# Supplementary material for: An Efficient Feature Selection Strategy Based on Multiple Support Vector Machine Technology with Gene Expression Data
Source: Biomed Res Int. 2018 Aug 30;2018:7538204. doi: 10.1155/2018/7538204 (PMC6136508; doi:10.1155/2018/7538204)
Supplement: Supplementary Materials — The supplementary materials contain the files of GEO data set and TCGA data set used in the experiment, as well as the main code files used in the experiment. [file 7538204.f1.xlsx]

## Sheet: Sheet1
ID_REF	GSM413367	GSM413368	GSM413369	GSM413370	GSM413371	GSM413372	GSM413373	GSM413374	GSM413375	GSM413376	GSM413377	GSM413378	GSM413379	GSM413380	GSM413381	GSM413382	GSM413383	GSM413384	GSM413385	GSM413386	GSM413387	GSM413388	GSM413389	GSM413390	GSM413391	GSM413392	GSM413393	GSM413394	GSM413395	GSM413396	GSM413397	GSM413398	GSM413399	GSM413400	GSM413401	GSM413402	GSM413403	GSM413404	GSM413405	GSM413406	GSM413407	GSM413408	GSM413409	GSM413410	GSM413411	GSM413412	GSM413413	GSM413414	GSM413415
100002	0.1134	0.056	-0.2562	0.1638	0.2423	0.6244	0.5118	0.6083	-0.1223	0.3054	0.286	0.3177	0.1891	0.1538	0.4773	-0.0308	-0.1494	0.1105	0.529	-0.3553	0.0458	0.1811	0.0384	-0.1046	0.0075	0.4332	0.1898	0.1262	-0.656	0.2551	-0.1838	0.0596	-0.2272	-0.0567	-0.2493	-0.4095	0.3698	0.607	0.2314	-0.0776	-0.418	0.2242	0.1081	0.6599	0.19	0.7022	0.5343	0.0776	-0.0499
100037	0.2036	-0.2881	0.3	-0.1245	-0.1931	0.6167	0.3156	0.1385	-0.1324	-0.0705	-0.0174	0.3047	0.0035	0.1665	0.351	0.2044	0.4278	-0.2796	0.2889	0.5666	-0.0985	0.6023	0.3301	0.0052	-0.0367	0.3618	0.1999	-0.0002	0.8466	-0.0997	0.031	0.1969	0.0009	0.1987	-0.4407	-0.0133	0.0543	0.8463	-0.0049	0.2764	-0.3405	0.3826	0.1299	0.441	0.5102	0.9225	0.0603	0.0742	0.1389
100058	-0.1888	-0.1852	-0.535	0.0004	-0.1942	0.5297	-0.0255	0.5359	0.4558	0.4745	0.0311	0.1156	0.0006	-0.2158	-0.313	-0.2704	-0.0857	0.1527	0.148	0.257	-0.287	-0.199	-0.1258	-0.0108	-0.2282	0.0826	-0.2379	0.1238	0.0218	-0.5111	0.4171	-0.1781	0.0827	-0.1111	0.0757	-0.2295	0.2552	0.2095	0.3863	0.0389	-0.2628	0.2971	0.0395	0.0824	0.0381	0.1078	-0.1648	-0.2195	0.1825
100079	0.4796	0.1218	-0.4838	0.0131	0.2402	0.2539	0.4935	0.6921	0.0927	0.4592	0.0829	0.2661	0.193	0.0344	0.5013	0.2007	0.2344	-0.1983	0.4137	0.2304	0.1444	0.0651	0.008	-0.2774	0.4204	0.1938	0.1569	0.0971	0.3189	0.0639	-0.1115	-0.1564	-0.0593	-0.4772	-0.3122	-0.2655	0.4354	0.5136	0.3736	0.0297	-0.596	0.2336	0.1594	0.3968	0.0704	0.5095	0.2118	0.0494	0.076
100100	-0.4458	-0.0933	-0.2071	0.0706	-0.2367	0.1844	0.0015	-0.3982	-0.0905	-0.162	0.0146	0.3374	0.1559	-0.0049	0.0288	-0.1635	0.3794	-0.2166	0.1746	0.129	-0.2764	0.1527	-0.0096	0.0612	-0.0563	0.1812	0.2441	0.4649	0.7903	0.0145	-0.1789	0.2792	0.4521	0.1718	0.1844	0.2838	0.0278	0.5325	0.498	-0.0865	-0.3082	0.3184	-0.1124	0.3353	-0.2901	0.1629	0.3138	0.1279	0.4586
100120	1.1943	-0.3895	0.8929	-0.4242	-0.3181	-0.0602	-0.1093	-0.6797	0.2609	0.0244	0.0144	0.0449	-0.0079	0.1167	0.0976	-0.1809	-0.2504	-0.4368	-0.4828	-0.5169	-0.2749	0.36	0.5293	0.518	-0.1556	0.1461	-0.1897	-0.3094	-0.0247	0.0227	0.1526	0.0625	-0.2349	-0.035	-0.6218	-0.2593	-0.0939	0.2977	-0.8592	-0.0681	0.1562	-0.3076	0.1526	0.1573	0.4171	0.3185	-0.293	-0.1844	0.5978
100130	0.1967	-0.0338	-0.0872	0.2796	0.1065	0.0686	0.4344	-0.1383	-0.6275	0.1631	-0.0333	-0.4878	0.3419	0.4161	0.8138	-0.0316	0.2908	0.0034	0.3695	-0.5292	0.2981	-0.0117	0.3969	0.3286	0.4958	0.7483	0.3123	-0.1379	0.3945	-0.0012	0.6039	0.0727	0.1906	-0.4673	-0.2532	-0.4801	0.2113	0.6128	0.4103	0.2544	-0.2052	0.0897	0.242	0.3424	-0.3998	0.5086	0.6015	-0.0087	0.2131
100137	-0.1341	0.0173	-0.266	-0.1232	-0.219	0.5358	-0.016	0.3299	0.2077	0.3385	-0.0139	0.0786	-0.0759	-0.1716	-0.4077	-0.0876	-0.1292	0.0582	0.1328	0.1139	-0.1687	-0.09	-0.1641	0.0215	-0.2306	0.0248	-0.0723	0.1318	0.3655	-0.3523	0.1616	0.056	-0.0377	0.0031	0.087	-0.2293	0.0886	0.3004	0.1208	-0.0061	-0.3239	0.1419	-0.1533	0.1318	-0.0893	0.0209	-0.1781	-0.2434	0.1431
100146	-0.071	0.1388	0.449	0.0927	0.2361	-0.5465	-0.0807	-0.2292	-0.4431	-0.7002	0.2054	-0.231	0.2536	0.3142	-0.0903	0.1264	-0.5206	0.127	-0.159	-0.1804	0.1272	0.0168	0.1458	0.0617	0.0218	-0.2565	0.0742	-0.5657	-0.5144	0.4561	0.2573	0.3857	-0.2522	0.103	0.2009	-0.0044	-0.339	-0.3241	-0.6854	0.3093	0.2145	-0.5432	0.1325	-0.2791	0.0502	-0.4344	0.1325	-0.0285	-0.5303
100181	-0.2515	1.086	-0.2211	-0.4432	-0.3977	2.0714	-0.5984	0.102	1.0142	1.127	-0.7919	0.0412	-0.5235	-0.6626	-0.5065	-0.1246	0.0129	0.1797	-0.3677	-0.1639	0.0755	-1.2255	-1.2087	-0.3419	0.1827	-0.6824	-0.8793	0.9898	0.2061	-1.709	1.6621	-0.8486	-0.122	-1.3447	-0.3572	-1.0233	0.2586	-0.4657	0.6075	-0.0582	0.0031	0.3539	-0.5473	0.6053	-0.1963	0.1695	-0.3188	0.0504	-0.4875
100184	0.1909	0.0101	-0.026	-0.0112	-0.0559	-0.2076	0.2709	-0.0686	-0.1613	-0.1872	-0.1244	0.0051	-0.0888	0.1254	-0.319	-0.036	-0.0929	-0.2145	-0.0298	0.1323	-0.1797	0.2731	0.0448	0.2612	-0.0693	0.343	0.0733	0.1945	0.5338	0.1515	0.3024	0.0737	0.1928	0.1756	-0.2287	0.1572	-0.1623	0.3183	-0.0277	0.2255	0.1128	0.1176	0.1294	-0.0276	0.1934	0.8825	0.2578	-0.04	0.2141
100195	0.6653	-0.3332	-0.3119	-0.3388	-0.1624	0.6127	0.0076	0.6832	0.0805	0.3034	-0.4213	-0.1067	-0.7244	-0.3029	0.3395	0.1756	0.0226	-0.0034	0.285	0.3479	-0.2915	-0.2657	-0.0127	0.183	0.0669	0.139	-0.2031	-0.1132	0.1612	-0.2245	0.2126	0.0511	-0.2267	0.0938	-0.1842	-0.0829	0.3535	0.4348	-0.1279	-0.0882	-0.6602	-0.0952	-0.0078	0.5076	0.436	0.3439	-0.7385	-0.1764	0.1438
100249	-0.1042	-0.2838	-0.8205	0.0383	0.5087	-0.2021	0.0216	1.7499	0.3245	1.5542	-0.0749	-0.3216	0.3401	-0.2291	0.7936	-0.6579	-0.1891	0.9352	0.7261	0.4759	0.0923	-0.834	0.4281	-0.3057	-0.1546	0.1985	-0.8453	0.1271	-1.6711	-1.1508	-0.2847	-0.9463	-0.7778	-0.6668	0.4255	-0.8775	0.9522	-0.5978	0.4409	-0.4091	-0.0045	0.3786	0.7239	0.7013	-0.9012	-0.5246	0.3453	-0.0825	-0.6576
100313	0.2671	0.1518	-0.5598	-0.0672	-0.1403	0.7476	0.3049	0.3865	0.2718	0.315	-0.0392	-0.0429	-0.0866	0.0384	-0.0407	-0.0785	-0.0656	-0.0683	-0.0068	0.2881	-0.2318	0.13	0.1891	-0.0771	-0.0927	0.291	0.0479	0.0639	0.3417	-0.276	0.151	-0.0439	0.0037	-0.2048	0.1613	-0.0201	0.4111	0.5264	0.6206	0.2005	-0.2541	0.2458	0.1067	0.3369	0.0101	0.2105	0.1156	-0.0756	0.2932
100340	0.6239	-0.6084	-0.3139	0.0355	-0.0016	0.3065	-0.1422	-0.0238	0.0609	0.36	-0.3495	-0.2359	-0.3411	0.0876	-0.0484	0.0548	-0.2421	-0.0298	-0.512	0.1784	-0.0855	-0.2172	0.186	0.3524	-0.0342	0.199	-0.2754	-0.502	-0.1737	-0.6952	0.2307	-0.0656	-0.4043	-0.2172	-0.1132	-0.4797	0.038	0.3463	0.0094	-0.0071	-0.1437	0.7986	0.2508	-0.267	-0.0568	0.1635	-0.0292	-0.4052	0.2115
100344	-0.4455	-0.349	-0.5153	0.2245	0.0928	0.583	0.1212	-0.2349	-0.2768	0.0404	0.6062	0.2307	-0.0354	0.0795	0.3702	-0.0064	0.1541	0.2909	0.5978	-0.0368	0.3314	0.15	0.032	0.1201	0.151	0.3979	0.5288	0.5655	-0.5134	0.0557	-0.2872	0.364	-0.0168	0.049	0.0641	-0.3542	0.0618	0.9578	0.2914	-0.0285	-0.2386	0.2911	0.2704	0.484	0.2238	0.6944	-0.0192	0.1844	0.3378
100348	-0.705	-0.2021	-1.0028	0.1543	-0.0158	0.0317	-0.224	1.3715	0.5355	1.4797	-0.381	-0.0776	0.1175	-0.3308	0.3699	-0.1019	0.1146	0.5193	0.8725	0.6891	-0.2572	-0.7432	-0.1771	-0.2035	-0.4735	0.2544	-0.9685	0.0525	0.1105	-1.2506	-0.3861	-0.8525	-0.1098	-0.6457	0.359	-1.024	1.0993	-0.1515	0.5921	-0.5319	-0.2644	0.5243	0.1438	0.113	-1.1124	-0.8055	-0.0589	-0.5097	-0.4615
100356	0.0071	0.1947	-0.9931	0.1467	-0.0529	0.5451	0.0081	0.2527	-0.0017	0.4551	0.4032	0.1996	0.094	-0.1299	0.8031	-0.3449	-0.1247	0.1011	0.2652	0.0336	-0.3489	0.1434	-0.2388	-0.1628	-0.1115	-0.0332	0.2923	0.3119	-0.0194	-0.0864	0.0094	0.2626	0.0063	-0.0426	0.0935	-0.048	-0.044	0.708	0.5097	-0.0482	-0.6858	0.5979	0.1049	0.4127	-0.3066	0.1704	0.1672	0.0552	0.2406
100384	-0.342	0.2196	-0.3398	0.3388	0.0084	0.465	0.1251	0.4314	-0.1232	0.3693	-0.133	0.3714	-0.11	-0.1541	0.0854	-0.0745	0.1238	-0.0744	0.3861	0.4407	-0.2814	-0.172	-0.2157	-0.3698	0.0655	0.2533	0.0854	0.0898	-0.0437	-0.4063	0.0962	-0.3072	-0.0315	0.2993	0.117	-0.301	0.2534	0.0715	0.6912	-0.263	-0.3038	0.2138	-0.1293	0.0563	-0.263	-0.2019	0.2146	0.3536	-0.066
100385	0.4629	-0.1473	-0.2571	0.024	0.0209	0.2343	0.6175	0.6464	0.2465	0.6216	-0.049	-0.0539	0.1971	0.1279	0.6784	0.2458	0.4274	0.4493	0.6431	0.4019	0.2822	0.026	0.2812	-0.0208	0.587	0.3666	0.2738	0.2036	0.0786	-0.4692	-0.048	0.0881	-0.3442	-0.2585	-0.1886	-0.4677	0.2493	0.7804	0.5311	0.2107	-0.2616	0.5411	0.2295	0.1969	0.1145	0.7132	0.1704	0.0874	-0.1523
100390	-0.3498	-0.3159	-0.9742	0.2446	0.0644	-0.0454	-0.3284	1.5573	0.7447	1.2177	-0.5417	-0.1743	0.0138	-0.5151	0.1265	-0.3209	0.2217	0.3839	0.7083	0.7446	-0.4632	-0.7391	-0.3596	-0.5303	-0.3893	-0.2025	-0.9478	0.0661	-0.4132	-0.8355	-0.4963	-1.0005	-0.3403	-0.8874	0.1292	-0.1362	0.8487	-0.3444	0.5094	-0.662	-0.0557	0.632	-0.0305	0.0311	-0.6621	-0.5693	-0.1801	-0.2911	-0.3095
100410	-0.3266	0.2502	0.1296	0.4025	-0.1038	-0.2228	0.0971	-0.9787	-0.2014	-1.0115	-0.067	-0.1361	0.573	0.0184	-0.2004	-0.0818	0.1751	-0.1781	-0.2216	-0.0375	0.4413	0.0804	-0.0358	-1.3369	-0.0295	-0.15	0.3377	-0.1385	-0.5467	0.8045	-0.1002	0.6194	0.016	0.1742	0.3713	0.1029	-0.5655	-0.0597	-0.6591	0.8066	0.3248	-0.7	-0.2849	-0.0344	0.1559	-0.3995	0.4045	0.2204	-0.4012
100423	-0.237	0.0306	0.1498	-0.0145	-0.3419	0.3811	-0.2137	0.1723	0.0924	-0.0189	0.0276	0.3599	0.3567	-0.1457	-0.2408	-0.0607	0.0905	-0.0388	-0.0145	-0.1758	0.0104	0.0316	0.1446	-0.1435	-0.3596	-0.1225	0.144	0.1727	-0.1812	0.1297	0.1673	0.2217	0.1398	0.0959	-0.0087	0.1794	-0.2027	-0.1357	-0.2252	0.2755	-0.2477	0.2066	-0.139	0.4053	0.0924	-0.1401	-0.116	0.0177	0.1673
100430	0.4683	-0.2269	-0.3935	0.3144	0.1386	0.4116	0.7312	0.4748	-0.434	0.4573	0.2582	-0.0038	0.3336	0.1491	0.1353	0.4073	0.4901	0.3023	0.4119	0.5267	0.0379	0.1832	0.3393	0.283	0.5896	0.2482	0.1057	0.2419	0.2156	0.0491	0.0323	0.4231	0.0245	0.0841	0.0047	-0.1803	0.0199	0.3332	0.3221	0.0198	-0.2786	0.5513	0.4416	0.3832	0.3857	0.4779	0.335	0.5918	0.068
100442	0.4412	-0.4595	0.4288	-0.2015	-0.2037	0.4169	0.3296	0.2037	-0.1728	-0.0469	-0.0705	0.3538	0.1847	0.1911	0.0868	0.159	0.43	-0.3847	0.0608	-0.0296	0.2498	0.3469	0.5399	0.5159	0.2955	0.4165	0.2418	0.2329	0.315	0.1903	-0.0419	0.3315	0.149	0.2511	-0.3347	0.0507	-0.0617	0.6585	-0.0491	0.0231	-0.1144	0.3419	-0.1619	0.2897	0.2857	0.7904	0.2099	0.1999	0.5909
100454	0.4455	-0.2041	-0.4315	0.3246	-0.1766	0.2837	0.0929	0.423	0.1943	0.5787	0.0598	0.098	0.2931	-0.103	0.173	0.0329	0.5537	-0.1829	0.4596	0.2872	-0.1412	-0.2036	0.0169	-0.3727	-0.3716	0.1548	0.2955	-0.0013	0.9662	-0.205	-0.3693	-0.2336	-0.2201	0.0997	-0.0497	-0.16	0.1642	0.8883	0.6766	-0.1406	-0.453	0.7715	-0.1184	-0.0462	-0.4379	0.2583	0.2274	0.0831	0.4982
100460	-0.2377	-0.0946	-0.158	0.0458	-0.2362	0.175	-0.0183	-0.3174	-0.2333	-0.092	0.0567	0.3575	0.0402	0.0966	0.2091	-0.1402	0.4173	-0.3355	0.3277	-0.0679	-0.1122	0.3241	0.1729	0.2654	-0.0905	0.1675	0.2238	0.4997	0.9843	0.2977	-0.2137	0.2524	0.4223	0.0249	-0.0581	-0.05	0.0997	0.7212	0.3935	-0.0703	-0.225	0.4141	-0.2553	0.2983	-0.2328	0.5344	0.3405	0.1508	0.5093
100485	0.146	-0.2312	-0.3763	-0.3047	-0.5039	0.5618	-0.1552	-0.4357	0.2889	0.1905	-0.2174	-0.5345	-0.8149	0.1879	0.3432	0.2254	-0.1616	-0.535	-0.2146	-0.0177	0.0899	-0.281	-0.3316	0.0692	-0.0779	-0.1294	-0.2843	0.2088	0.9119	-0.4989	0.465	-0.3103	-0.1672	0.0084	-0.5483	-0.1408	0.1069	0.1712	0.1231	0.0345	-0.0336	0.0036	0.1427	0.4236	0.4062	0.7278	-0.2832	-0.1319	0.421
100503	0.4299	-0.2317	-0.026	-0.0855	0.3562	0.6444	0.6377	0.5367	-0.1758	0.1916	0.0664	-0.0994	0.207	0.0476	0.6427	0.1644	-0.1257	0.2048	0.0636	-0.0385	0.259	0.2153	0.3133	-0.0844	0.5133	0.3538	0.1257	-0.2118	-0.404	-0.3201	0.2265	0.13	-0.1438	-0.2161	-0.4061	-0.1406	0.2509	0.1714	-0.1093	0.0396	-0.5133	0.2454	0.2365	0.4	0.4768	0.6684	0.0906	-0.0126	0.2047
100537	-0.2553	-0.1029	0	-0.0005	-0.3325	0.2907	0.0843	-0.4049	-0.0567	0.0669	-0.0489	0.2182	0.0544	0.057	-0.0358	0.0364	0.0615	-0.5371	-0.227	0.0179	-0.0695	0.2571	0.3467	0.4085	-0.1206	0.3395	0.1113	0.264	0.4419	-0.3614	0.4944	0.0219	0.2689	0.1342	-0.1027	0.5004	0.0122	0.4548	0.3466	0.1245	-0.3221	0.4631	-0.0181	0.1094	0.1162	0.1893	0.2387	-0.1388	0.5803
100543	-0.2066	-0.1954	0.176	-0.0694	-0.1462	0.2866	-0.4894	0.3636	0.2165	0.3337	-0.3036	-0.0536	-0.4269	-0.2811	-0.062	-0.1782	-0.0172	-0.5806	0.0225	0.1184	-0.1168	0.1534	-0.314	0.1228	-0.6627	-0.1567	-0.387	0.0627	0.4995	0.0917	-0.068	-0.0052	-0.0114	0.0975	-0.5454	0.1456	0.0957	0.2071	0.2455	-0.1565	-0.144	0.1357	0.011	-0.0941	0.4157	0.0598	-0.4977	-0.3125	0.5289
100552	0.2234	0.0269	-0.1719	-0.0289	-0.0622	0.432	0.1688	0.8561	0.343	0.5908	-0.0025	0.0327	0.2721	0.0067	0.0579	-0.1622	-0.117	0.3331	0.2561	0.1803	-0.1289	-0.2202	-0.0682	-0.2838	0.0171	0.201	-0.1595	0.3341	-0.1502	-0.3875	0.2478	-0.1282	-0.3606	-0.3552	0.0461	-0.2317	0.1778	0.4572	0.4119	-0.0059	-0.4608	0.6281	0.2806	0.3971	-0.1486	0.225	0.1903	0.148	0.0654
100591	0.0611	-0.3775	-0.1861	0.1142	0.1017	0.3619	0.3309	0.2196	-0.1347	-0.0063	0.0913	0.1236	-0.1111	0.004	0.2709	0.0793	-0.3457	-0.0999	0.1299	-0.2933	0.0275	0.2493	0.1201	0.1077	0.1302	0.0916	0.2252	0.1314	0.5849	0.1561	-0.0194	0.1686	-0.0358	-0.0959	-0.3157	-0.1909	0.0632	0.7268	0.0456	-0.0891	-0.3625	0.3082	-0.114	0.0406	0.0528	0.6349	-0.0098	-0.0964	0.3245
100627	0.0479	-0.4423	-0.3951	0.193	0.3124	0.2573	0.571	0.2251	-0.5053	0.1665	0.4643	0.0618	0.2643	0.1589	0.0827	-0.2022	-0.4482	0.0624	0.4152	-0.0734	-0.039	0.07	0.2017	-0.0326	0.04	0.4124	0.1803	-0.1418	-0.739	0.0567	-0.222	0.1248	-0.1635	-0.2092	0.0769	-0.5919	0.243	0.1926	-0.0947	0.0703	-0.3289	0.0733	0.1293	0.5187	-0.0373	0.3215	0.4541	-0.0501	-0.317
100629	0.1367	0.1852	-0.5279	-0.4392	0.0773	0.5092	-0.5048	0.2915	0.5919	0.5516	-0.3555	-0.0913	-0.1951	-0.0641	-0.2648	-0.6728	-0.6281	0.0024	-0.2423	0.2725	-0.1744	-0.2837	-0.4159	-0.1474	-0.2428	0.1737	-0.5206	0.4306	-0.2771	-0.842	0.9974	-0.0773	0.3582	-0.2538	-0.2411	0.0685	0.2595	-0.1378	-0.438	-0.053	-0.2631	0.1351	0.3116	0.276	0.0959	-0.0267	-0.1176	-0.059	0.4028
100636	-0.5105	-0.2746	0.0811	-0.2369	-0.3104	0.4744	0.4022	0.0722	-0.2998	-0.1207	0.5406	0.3162	0.2397	0.0696	0.1619	-0.0157	0.0645	-0.2098	0.3074	-0.0633	-0.0038	0.2386	0.0317	0.1324	-0.101	-0.1255	0.4574	-0.1133	0.4416	0.3665	0.024	0.2881	0.0478	0.0348	-0.0696	0.2231	-0.2204	0.7489	0.1476	0.1981	-0.3873	0.2143	0.0687	0.1334	0.1149	0.36	0.1379	0.0688	0.0897
100639	-0.0314	-0.1961	-0.3319	0.2758	-0.1398	0.5848	0.2465	-0.0414	0.1785	0.2492	0.2108	0.3695	-0.1466	-0.0432	0.3088	-0.2355	0.2215	0.1831	0.5616	0.3237	-0.2006	0.1146	-0.3485	-0.1596	0.0853	0.0931	0.0946	0.5527	0.5762	-0.1051	-0.2272	0.403	-0.0389	0.3401	-0.1843	-0.2299	0.3786	0.6653	0.6073	0.0075	-0.0089	0.5233	0.1053	0.3401	-0.0244	0.4363	-0.0971	0.2893	0.4676
100641	-0.0469	-0.0098	-0.6958	-0.2398	-0.0135	0.4991	-0.4355	1.0555	0.9449	1.0637	0.0902	0.2348	0.3024	-0.1985	-0.2607	-0.2729	-0.2158	0.5745	0.4794	0.7967	-0.2764	-0.452	-0.1261	-0.0829	-0.3958	0.1732	-0.7505	0.31	-0.1598	-1.0772	0.2274	-0.6258	-0.135	-0.3319	0.2055	-0.1351	0.5368	0.0346	0.3415	-0.2695	-0.3682	0.6907	0.4684	0.3527	-0.3672	-0.2855	-0.2101	0.1423	-0.1331
100664	-0.2377	0.0141	-0.1532	0.2087	0.18	0.1329	0.0222	0.0252	-0.1131	0.1926	-0.0111	0.1672	-0.2163	0.1296	-0.0536	-0.1033	-0.1061	0.3365	0.1493	-0.0092	-0.0108	0.131	-0.2653	0.1211	-0.0668	0.2066	-0.0098	-0.0747	0.5239	-0.4168	-0.244	0.2329	0.0939	0.0756	0.1508	-0.0131	0.1884	0.3324	0.308	-0.3103	-0.2798	0.2234	-0.3508	0.146	-0.4186	0.0641	-0.0863	0.1801	-0.2108
100691	-0.4902	0.123	-0.3001	-0.0229	-0.1708	0.2703	0.2013	0.1702	-0.2039	-0.2009	0.3654	0.1398	-0.111	0.1075	0.372	-0.508	0.1161	0.0631	0.2146	0.0605	0.1258	0.3225	-0.1776	-0.1543	-0.2471	0.3214	0.2254	0.3487	0.2285	0.3147	-0.3549	0.3281	0.0545	0.0937	-0.3778	-0.4547	0.4286	0.5192	0.0537	-0.0891	-0.2741	0.1893	-0.2586	0.3558	0.3509	0.7479	0.4041	0.0828	-0.0173
100694	-0.1404	-0.9521	-0.4432	0.0976	-0.6861	-0.4651	0.0371	-0.2698	-0.2417	-0.1195	-0.5065	0.0628	-0.2136	0.1515	-0.5947	-0.4894	0.6409	-0.8485	-0.4307	0.7353	-1.1592	-0.1146	0.6279	0.0094	-0.5978	0.4391	0.3184	-0.9899	-0.0256	-0.2725	0.2342	0.2016	0.4014	0.3379	0.3875	-0.4027	0.3295	0.2959	0.4313	-0.0502	-0.0833	0.3728	-0.159	-1.0854	0.107	-0.2115	0.3249	-0.7807	0.4943
100702	0.0817	-0.0348	-0.2737	-0.0733	0.0121	0.2579	-0.0105	0.1643	0.1177	0.3213	-0.1868	-0.078	0.0398	-0.0089	0.0698	-0.2407	-0.1704	0.0146	-0.0557	-0.088	-0.3283	-0.1218	-0.142	-0.1612	0.0084	0.2616	-0.3485	0.0325	-0.6463	-0.59	0.1102	-0.1591	-0.1191	-0.0489	-0.0786	0.216	0.1892	-0.1681	0.4967	-0.0867	-0.1958	-0.076	0.1051	0.1208	-0.1434	0.1169	0.1105	-0.1307	0.2665
100709	-0.091	-0.3818	-0.8427	0.0639	0.2868	0.0328	0.3562	0.5079	-0.0686	0.6593	-0.0962	-0.0153	0.1143	-0.1053	0.3561	-0.0943	-0.1725	-0.1355	0.2024	0.2653	-0.284	-0.1369	0.1167	-0.2887	0.3201	0.2594	0.0954	0.2523	-0.3978	-0.5284	-0.057	-0.0897	0.0719	-0.2284	-0.0684	-0.0722	0.3456	-0.5141	0.2209	-0.4496	-0.2652	0.4959	0.242	-0.2723	-0.2194	0.113	0.17	-0.0628	0.2755
100710	0.5842	-0.023	-0.6232	-0.1004	0.3206	0.1979	0.4206	0.7818	0.248	0.7478	-0.0894	-0.0213	-0.0441	-0.076	0.717	0.1616	-0.1495	0.3412	0.6026	0.3509	0.3085	-0.0862	0.3909	-0.1811	0.5143	0.3351	-0.1055	0.5388	-0.2308	-0.6833	-0.1182	-0.0649	0.034	-0.4691	0.1029	-0.3676	0.593	0.2953	0.4425	0.0413	-0.255	0.5482	0.0549	0.1335	0.0241	0.371	0.0305	-0.2971	-0.0624
100765	-0.1382	-0.0929	-0.336	0.1485	0.1281	0.7457	0.4729	0.4028	0.0844	0.3401	0.0147	0.1086	-0.2005	-0.0411	0.1088	-0.2105	-0.013	0.1537	0.2831	-0.1572	-0.2322	-0.0709	0.0058	0.1821	0.326	0.1813	-0.2311	0.9486	0.15	-0.3431	0.3426	-0.2744	0.2478	-0.0128	-0.1469	-0.4319	-0.005	0.4566	0.2114	0.0077	-0.6505	0.5369	0.282	0.3225	0.316	0.1785	0.0985	-0.1073	0.2561
100771	-0.0921	-0.3793	-0.4768	0.0751	0.0822	0.052	0.1863	0.5476	0.0205	0.2852	0.0092	-0.0722	0.1173	-0.0901	0.1496	-0.2529	-0.0009	0.3178	0.4299	0.2479	-0.1755	-0.3271	-0.1357	-0.1311	-0.2142	0.063	-0.412	-0.0169	-0.4373	-0.4525	-0.3006	-0.3481	-0.4243	-0.346	0.2435	-0.62	0.4219	-0.1346	0.1607	-0.2576	-0.2323	0.2785	0.0447	0.1778	-0.4581	-0.2235	0.0266	-0.1738	-0.1247
100777	0.5883	1.7556	0.7305	-0.1235	0.1216	-0.4891	-0.0169	0.2945	0.0867	0.0445	-0.5766	0.827	0.0473	-0.1781	0.7907	0.5016	0.0415	0.6369	0.5993	-0.207	0.4309	0.3256	0.0615	-0.3325	-0.4855	-0.9679	-0.2056	-0.4466	0.12	-0.0989	-0.7921	-0.0986	-0.1581	-0.1875	-0.1877	-0.0065	0.5788	-0.5983	0.4634	-0.8596	0.4603	-0.3524	0.0391	-0.2176	0.4392	-0.3001	-0.2478	0.6622	-0.2593
100826	0.1697	0.0143	0.3183	-0.1061	-0.0538	0.603	0.1151	0.1537	0.121	-0.1287	0.436	0.3118	0.4837	0.2223	-0.6102	-0.1565	-0.1556	0.0535	0.0221	-0.1503	0.0724	0.6977	0.3063	0.2563	-0.0976	0.4095	0.6271	0.3514	0.4283	0.115	0.496	0.2659	-0.1653	0.4509	0.0427	0.6644	0.0325	0.6973	-0.3399	0.4861	-0.4228	0.3723	0.2713	0.6408	0.5265	0.2437	0.1701	0.3316	0.4422
100840	0.1207	-0.0935	-0.1049	-0.1752	-0.5266	0.4065	-0.0533	0.5433	0.7001	0.5853	0.3952	-0.2402	0.0649	-0.3063	-0.6508	0.071	0.0882	-0.2691	0.0257	0.1534	-0.5992	0.2686	-0.1101	0.0961	-0.2997	-0.1799	-0.2766	0.8156	0.3711	0.0409	1.2132	-0.1536	0.3943	-0.0955	-0.298	0.5329	-0.0546	0.3741	0.0551	0.0475	-0.5674	-0.0243	0.0997	0.2736	0.416	-0.5476	-0.2088	-0.0282	0.4129
100845	0.0569	0.0098	-0.0546	0.0358	-0.0533	0.1345	0.0554	-0.0774	-0.2529	0.0752	-0.0795	0.2569	-0.0545	0.222	0.0849	0.1373	-0.1104	-0.0552	-0.0488	0.1217	0.0139	0.1265	0.0648	0.1814	0.1221	0.111	0.0825	0.3015	0.2025	-0.1501	0.3683	0.0353	-0.0461	-0.0443	-0.1011	0.132	-0.1781	0.3521	0.4595	-0.1826	0.046	0.3088	-0.096	0.1623	0.1715	0.0178	0.1571	0.1524	0.0122
100892	-0.0313	-0.5536	-1.163	-0.1058	0.4938	0.1267	0.6884	0.8755	-0.3737	0.1707	0.2327	-0.0516	0.2618	0.285	0.1642	-0.2585	-0.2549	0.0168	0.3141	1.0084	-0.2453	0.0404	-0.0238	0.0852	0.4619	1.1151	0.435	-0.1591	0.2666	-0.1933	0.693	-0.0092	-0.3977	0.5382	-0.0522	-0.1031	0.0198	0.7648	0.1148	-0.1494	-0.2919	-0.0644	0.0331	1.1073	-0.1466	-0.2142	1.1355	0.7489	0.3565
100894	-0.1413	0.2706	-0.2009	0.0925	0.4288	0.222	0.2327	0.5806	-0.0774	0.166	0.0131	0.0137	0.0019	-0.1928	-0.138	-0.1905	-0.471	0.348	0.326	-0.2753	-0.1702	-0.1501	-0.1994	-0.274	-0.1397	0.0076	-0.2284	-0.3559	-0.5662	-0.1631	-0.4231	-0.2306	-0.5008	-0.3182	0.2329	-0.4497	0.3692	-0.2198	0.1522	-0.272	-0.07	0.0826	0.0096	0.185	0.0613	-0.1189	0.0212	0.0813	-0.4535
100901	-0.0746	0.0722	-0.8238	-0.2717	-0.1081	0.3468	-0.3898	1.25	1.2011	1.5737	-0.2384	0.1546	0.0452	-0.2311	0.1326	-0.3667	0.3332	0.5844	0.9476	0.637	-0.2936	-0.4055	-0.0586	-0.1104	-0.5502	0.3241	-0.9463	0.8782	0.4311	-1.4919	0.3739	-1.0089	-0.0704	-0.3838	0.4398	-0.0618	0.6522	0.0753	0.7796	-0.3648	-0.311	0.8247	0.1177	0.305	-0.5181	-0.4724	-0.1847	-0.2842	0.2294
100914	0.2456	-0.19	-0.2729	0.2514	0.8097	-0.4273	0.5085	-0.1043	-1.2142	-0.371	0.9011	-0.3236	0.8611	0.7792	0.7464	0.0576	-1.2977	-0.2763	0.039	-0.6505	0.0527	0.5984	0.6316	0.0015	0.6705	0.5432	0.6805	-0.7252	-0.9203	0.3714	0.8101	0.4758	0.4441	0.0279	0.2466	-0.2112	-0.581	-0.6098	-0.2278	0.6405	-0.6232	-0.1799	0.3737	0.6831	0.0276	0.1309	0.6829	0.2158	-0.6167
100943	-0.0437	-0.1785	0.0441	-0.2054	-0.3737	0.302	-0.2098	0.0855	-0.5161	-0.1486	0.0807	-0.0433	-0.2029	-0.2004	0.351	-0.2195	-0.0346	0.2609	-0.0862	2.6611	-0.3378	0.0664	0.0338	0.082	-0.6064	0.1318	0.0805	0.4776	0.5476	0.0284	0.3378	0.0784	0.2801	-0.1078	-0.2321	-0.0528	0.0008	0.415	0.167	0.1516	-0.3086	0.89	-0.3596	-0.0552	-0.1223	0.1459	-0.0341	-0.4179	0.2755
100949	0.5909	0.2756	0.523	-0.294	-0.2231	-0.0175	0.0298	-0.1293	0.0795	-0.1626	-0.1587	0.1102	0.0365	-0.0619	0.3072	0.1601	0.0664	-0.2621	-0.1169	-0.2315	0.0827	0.1688	0.7036	0.2979	0.202	0.0437	0.0291	0.0768	0.5801	0.187	-0.1404	0.0019	0.0223	0.0885	-0.3186	-0.0085	0.0192	0.2433	0.0957	-0.0903	-0.1223	0.1482	-0.1404	0.1646	0.1483	0.2626	-0.1325	0.0437	0.2962
100951	-0.1287	-0.4699	-0.1677	0.4603	0.2845	-0.2391	0.5881	0.17	-1.1075	0.2612	0.1852	-0.489	0.1124	0.2908	0.7806	0.029	-0.1269	0.4252	0.0237	0.0667	0.321	-0.1652	0.0901	-0.3068	0.6837	0.2857	0.3457	-0.6843	-0.4432	-0.1133	-0.2231	0.3058	-0.1237	-0.4341	-0.0265	-0.2663	0.2938	0.2674	0.2328	0.3182	0.083	0.0906	0.374	-0.1086	-0.0571	0.6254	0.5372	-0.0669	-0.4282
100955	-0.1382	-0.2414	-0.3424	0.0317	0.272	0.588	0.4099	0.2136	0.0258	0.0612	0.4105	0.3744	0.0175	-0.1146	0.0048	0.0123	-0.2241	0.2163	0.5733	0.2003	0.0122	0.3657	0.0141	-0.05	0.0712	0.4261	0.3765	0.4467	0.5333	-0.0353	-0.3016	0.1321	0.174	0.1327	0.1047	-0.0605	0.1579	0.7179	0.1069	0.021	-0.1903	0.3734	0.066	0.3244	0.2922	0.6212	0.1928	0.066	0.2048
100963	-0.2884	0.0952	-0.0404	0.0552	-0.0259	0.2891	0.4386	-0.6292	-0.2011	0.1075	0.4255	-0.1075	-0.0909	0.0099	0.0978	-0.1372	0.2025	0.0125	0.1378	-0.3681	0.364	0.2617	0.0961	0.1167	0.2383	0.0706	0.3806	0.2198	0.1556	0.1544	0.0498	0.6117	0.0627	0.3365	-0.3552	0.0163	-0.5926	0.5046	0.2594	0.4536	-0.2535	0.1723	0.0097	0.4122	-0.3479	0.5836	0.3884	-0.159	0.2035
100966	-0.5183	0.1317	-0.5437	0.5477	0.26	0.1102	0.7488	0.3582	-0.4685	0.097	-0.7591	-0.225	-0.4283	-0.0289	0.5337	0.348	0.5266	-1.0319	0.4832	0.4557	0.0385	-0.0273	-0.1871	-0.4701	0.4679	0.3567	0.7443	-1.2341	0.1662	0.0746	-0.5591	0.1002	0.3809	-0.5106	0.0928	-0.9284	0.4193	1.1439	1.01	0.0737	-0.0552	1.1513	-0.7657	-0.7475	-0.3876	1.1431	0.6237	-0.1751	0.243
100969	-0.1795	0.1683	0.0904	0.3133	-0.0593	-0.0905	-0.0068	0.1131	-0.0335	-0.0975	0.1462	0.1148	0.2152	-0.0262	-0.1044	-0.0019	0.1718	0.3019	0.1684	-0.0995	0.092	-0.0685	-0.0874	-0.2641	-0.121	-0.4155	0.0093	0.0716	0.0723	0.1706	-0.2579	0.0492	-0.0221	-0.1886	-0.003	-0.1505	0.0036	0.1787	-0.0736	0.1725	-0.0198	-0.0685	-0.0217	-0.0795	0.0066	-0.038	-0.227	0.1688	0.0598
100989	-0.0918	0.095	-0.3665	0.3601	0.1774	-0.0668	0.3011	0.5173	-0.1956	1.5016	-0.4228	-0.1471	-0.3396	-0.1531	-1.9729	-0.0055	-0.454	-1.0543	-0.3341	0.8087	0.2748	0.7778	0.6339	0.9235	-0.7678	0.1138	0.4627	-0.5481	-0.3429	0.8801	0.5546	0.1228	0.4695	-0.1913	-0.4954	-0.1747	0.2602	0.0034	0.757	-0.16	-0.1709	0.5548	-0.5727	1.2507	0.1522	-0.8786	0.3317	0.4144	1.3683
101019	0.1082	0.2636	0.5153	0.1398	-0.5611	-0.4519	-0.1029	-0.3039	-0.3293	-0.741	0.1054	0.1512	0.3619	-0.0665	0.4159	0.2782	-0.0086	0.5867	-0.4054	-0.3949	0.2989	-0.1954	0.3665	-0.1973	0.2428	-0.626	0.424	-0.4981	-0.034	0.39	0.1448	0.1266	-0.124	-0.0656	0.2941	-0.1574	0.2692	-1.0751	-0.652	0.1987	0.1761	-1.1209	-0.0132	-0.678	-0.1808	-1.0217	-0.0772	0.024	-0.9815
101026	-0.3621	-0.4587	-0.2688	0.2215	-0.2915	0.2765	-0.2275	-0.6661	0.0321	-0.1135	0.3839	-0.0741	-0.4633	0.066	0.0721	0.0192	0.2409	-0.1906	0.0461	0.2629	-0.2064	0.083	-0.2266	0.2746	-0.0267	0.1261	0.1933	0.3204	0.2712	0.0576	0.2214	0.6517	-0.0745	0.2024	0.2538	0.5109	-0.3241	0.3389	-0.0426	-0.1348	0.0408	-0.0198	0.2358	0.3945	-0.2919	0.3164	-0.1293	-0.2537	0.4671
101039	0.1809	-0.2862	-0.5703	0.0249	0.3154	0.2834	0.351	0.6769	0.3043	0.5344	0.0246	0.1221	0.0797	-0.1301	0.2569	-0.2262	0.2085	0.0688	0.1005	0.237	0.0181	-0.3438	-0.0056	0.0249	-0.0976	0.1777	0.0382	0.406	0.5745	-0.1387	0.2062	-0.1626	-0.3136	-0.4542	0.0159	0.4151	0.1026	0.1333	0.3337	-0.1289	-0.5183	0.4281	0.2085	0.172	0.2539	-0.0191	0.3596	0.2576	0.8402
101042	-0.3338	-0.1606	-0.7791	0.5221	0.0954	-0.0097	0.0853	-0.7554	-0.0555	0.3756	-0.1214	0.1035	-0.0469	-0.0058	-0.1564	0.2348	-0.0066	-0.6196	-0.1471	0.621	-0.1995	-0.0346	0.076	0.0133	-0.0516	0.292	-0.0094	-0.4694	-0.2742	-0.3677	-0.3538	0.0806	0.0312	-0.0516	0.3531	-0.3327	-0.0579	0.1983	1.0607	-0.0997	-0.0418	0.7892	-0.325	-0.5836	-0.6893	0.1872	0.282	-0.0247	0.1623
101058	0.0297	-0.2268	0.0683	0.015	-0.0954	0.5567	0.0021	0.1167	0.1304	0.1968	0.4872	0.3442	0.4555	0.0069	0.1193	-0.1499	-0.0075	-0.1687	0.1492	-0.2164	-0.1473	0.3469	0.4632	0.123	-0.1235	0.1756	0.308	0.3661	-0.1361	0.1452	0.3049	0.1729	0.3871	0.1015	0.0074	0.4472	0.2776	-0.2586	0.0431	-0.0319	-0.2775	0.0067	0.0523	0.4664	0.0508	-0.0072	0.0086	0.086	0.7154
101065	0.1764	-0.0564	0.0558	0.0089	0.3243	-0.2266	0.2413	0.1164	-0.414	0.1467	-0.0256	0.0716	0.2732	0.3094	0.2833	0.1039	0.418	0.0749	0.3562	0.4061	0.1203	0.382	0.2804	0.3893	0.7194	0.1644	0.502	0.093	-0.4356	0.2291	0.2632	0.0837	-0.1873	-0.1618	-0.3003	-0.264	-0.3183	0.4517	0.9403	0.4836	0.0047	-0.1514	0.2208	0.4229	-0.0001	0.4696	0.47	0.3804	-0.4124
101068	-0.1164	-0.4126	-0.0575	-0.0254	0.0896	0.3511	-0.1774	-0.4048	-0.193	-0.1412	0.1913	-0.0679	-0.1453	0.0268	0.3827	-0.3131	0.0844	-0.3319	0.0145	-0.0861	-0.0964	0.0853	-0.0581	0.2953	-0.1082	0.119	0.0029	0.3991	0.5267	0.4717	-0.0293	0.1943	0.3587	0.3297	-0.0576	0.4655	-0.2276	0.4994	0.0575	0.0087	-0.0262	0.2115	-0.0759	0.3271	0.0294	0.0285	0.1655	-0.1275	0.6261
101070	0.1792	-0.1884	-0.4203	0.2507	0.0104	0.4246	0.2846	0.7187	0.0048	0.2523	0.0129	-0.1332	0.2231	0.009	0.002	-0.248	0.0799	0.2377	0.3801	-0.0872	-0.0744	0.0294	0.8485	-0.1764	0.1967	0.3368	0.1896	0.3513	-0.3519	-0.2454	0.2557	-0.0202	-0.2416	-0.0648	-0.1444	-0.2657	0.0021	0.611	0.1323	0.1111	-0.0379	0.6144	0.1622	0.2574	-0.0442	0.4762	0.3524	-0.0308	-0.0712
101072	0.4888	-0.5963	0.5672	-0.4587	-0.0975	0.1755	-0.0392	-0.4985	-0.2999	-0.0839	-0.3084	-0.4371	-0.3816	0.58	0.1654	0.0904	-0.222	-0.2095	-0.471	-0.3323	0.1101	0.3964	0.2248	0.3666	0.5711	0.3541	-0.1146	-0.0165	0.1161	0.1149	0.4626	-0.0371	0.1096	0.0724	-0.6443	0.1351	-0.3092	0.0125	-0.8348	-0.0498	-0.0448	-0.24	0.2892	0.3724	0.6271	0.5539	-0.2176	-0.37	0.1391
101108	-0.312	-0.6207	-0.5819	-0.044	-0.0547	0.0029	-0.2846	-0.4159	0.1469	0.3096	-0.3647	-0.1568	0.0162	-0.4906	0.0426	0.033	-0.3355	-0.2993	0.7994	0.9784	0.0761	0.0209	0.1212	0.0073	0.4746	0.498	0.2905	-0.1989	0.818	-0.7628	0.3245	0.0288	0.2949	0.2763	0.3362	0.2188	0.105	0.6092	0.815	-0.1329	-0.2458	0.4055	0.0652	-0.1007	-0.0981	0.0282	0.0277	-0.5456	0.4844
101113	-0.0442	-0.2102	-1.1606	-0.3151	0.5572	0.3455	-0.0152	2.0574	0.8765	1.6496	-0.2094	-0.0402	0.0379	-0.1407	0.2518	-0.5461	-0.318	0.6712	0.8192	0.9708	-0.3649	-0.991	-0.0406	-0.4057	-0.6257	0.2303	-1.0417	0.217	-0.4189	-0.9825	-0.3467	-1.0582	-0.8966	-0.6364	-0.0836	-0.5216	0.5493	0.2121	0.2177	-0.4938	-0.3741	0.8547	0.8609	0.5271	-0.7047	-0.1521	0.2804	0.021	-0.4353
101116	-0.0035	0.3637	-0.7488	0.4029	-0.1583	0.2954	0.2221	0.4829	-0.1353	0.3462	-0.3269	-0.0297	0.2589	0.2484	0.2582	0.0692	-0.0735	-0.143	0.4047	0.3721	0.3795	-0.1483	0.1536	-0.1683	0.2655	0.5199	0.3839	0.5191	0.4751	-0.5964	-0.15	0.3619	-0.0274	0.005	0.0102	-0.3868	0.4403	0.7214	0.947	0.126	-0.2305	0.5429	-0.1355	0.2521	-0.4305	0.508	0.2153	0.1754	0.4752
101120	-0.2957	0.0432	-0.1842	0.0557	-0.1329	0.252	0.0326	-0.2831	-0.1722	-0.0799	0.8804	0.3038	0.4118	0.0954	-0.2539	-0.1958	-0.0507	-0.1305	0.1149	-0.0674	-0.1175	0.2506	0.0389	0.1314	-0.2793	0.1281	0.232	0.3864	0.5857	0.0443	0.0264	0.3713	0.0732	0.0354	-0.2745	-0.0415	-0.0255	0.6296	0.0145	0.1963	-0.2941	0.446	0.1529	0.2028	0.1054	0.4017	0.2657	0.0575	0.1591
101125	0.5124	-0.3516	-0.4665	0.186	0.1427	0.5961	0.1458	1.0605	0.2759	1.1882	-0.0545	-0.3339	-0.1864	-0.1692	0.4405	0.077	0.3723	1.0439	0.8442	0.4153	0.4522	-0.2329	-0.0995	-0.2826	0.6078	0.0104	-0.0188	0.263	0.464	-0.742	-0.1405	-0.2564	-0.4101	-0.6273	-0.08	-0.9194	0.6599	0.623	0.7531	-0.2226	-0.2608	0.7813	0.3053	0.4332	0.0002	0.5489	-0.2703	-0.0035	-0.1656
101126	-0.1394	-0.2091	-0.1488	-0.191	-0.0949	0.0294	0.1121	-0.731	-0.2123	-0.1104	0.0724	-0.1661	-0.0046	0.2687	-0.0342	-0.2917	-0.3562	0.0222	-0.0197	-0.0688	-0.234	0.0437	0.0648	0.1785	-0.1385	0.3841	0.1846	-0.1163	-0.6972	-0.2074	0.2289	0.1112	-0.0622	0.0485	0.1455	0.1729	-0.2946	0.0999	0.1283	0.0346	0.0302	-0.0893	0.1561	0.2671	-0.2762	0.2606	0.1671	-0.2768	0.1827
101140	2.4807	-0.6659	-0.0626	0.2062	0.3309	0.105	0.2009	0.5732	-0.3711	1.0952	-0.9548	0.1919	-0.8343	0.1869	0.8491	0.5791	0.6765	0.3688	0.7609	0.8019	0.0743	0.7072	0.4113	0.6535	0.9411	0.1836	0.2381	-0.0383	0.9643	-1.0394	-0.878	-0.4852	-0.9922	-0.8337	-0.8889	-1.0444	0.0551	0.2789	0.2623	-0.3341	-1.3901	0.6973	0.0064	0.0671	0.3264	0.6243	0.2971	-0.122	0.9118
101145	0.4842	-0.4238	0.3637	-0.3258	-0.2014	-0.0966	-0.048	-0.2878	0.0734	0.0339	-0.2979	-0.131	-0.2281	0.1543	-0.2191	0.3438	0.0918	-0.3253	-0.617	0	-0.0127	-0.0481	-0.1348	0.2718	-0.0478	0.0956	-0.2935	-0.2848	0.5142	-0.4001	-0.0116	-0.2377	-0.2109	-0.0576	-0.5569	0.0278	-0.2881	-0.1827	-0.1704	-0.0398	0.1637	-0.0769	-0.0372	-0.3915	0.2276	-0.1719	-0.2137	-0.3422	0.196
101150	-0.4703	0.468	0.9782	0.2493	0.3083	-0.714	-0.2683	-0.3894	-0.0628	-0.9209	0.2511	-0.0576	0.2114	-0.1112	-0.2425	0.3849	-0.2551	0.3838	-0.3177	-0.3403	0.2843	-0.37	-0.1753	-0.4293	-0.0178	-0.8029	-0.0289	-0.7398	-0.4812	0.6461	-0.4949	0.1488	-0.4673	0.4236	0.5579	0.1241	-0.1939	-0.9236	-0.9918	-0.0055	0.5866	-1.1653	0.0423	-0.6964	0.0605	-0.9767	-0.448	0.4151	-0.897
101173	-0.4437	0.2561	0.6017	-0.0745	-0.0228	-0.1243	0.1355	-0.2202	-0.4579	-0.8489	0.0716	0.1904	0.4937	-0.0474	-0.0927	0.2906	0.4272	0.0996	-0.2088	-0.0255	0.1212	0.0495	0.1053	0.0179	-0.1888	-0.9525	0.3146	-0.0073	-0.296	0.6189	0.3187	0.2955	0.1083	0.3055	0.2133	0.1274	-0.0529	-0.2497	-0.0168	-0.1968	0.3137	-0.3869	0.0468	-0.65	-0.3333	0.1596	-0.3119	0.3333	-0.4771
101192	0.0918	-0.1935	-0.4931	-0.0807	0.3156	-0.0396	0.2467	0.3247	0.4569	0.241	0.2492	-0.119	-0.3793	0.3323	0.176	-0.0584	-0.3755	0.2371	-0.0918	-0.0387	-0.1553	-0.0268	-0.1777	0.0162	0.0441	0.0517	0.3229	0.1617	0.2331	-0.4455	-0.0198	0.19	0.0048	-0.1909	0.1122	-0.1709	-0.0245	0.0254	0.5475	-0.1099	-0.256	0.4112	-0.0443	0.0936	-0.1015	0.348	-0.0026	0.0581	0.1082
101193	0.49	-0.096	0.096	-0.1218	-0.0983	-0.0868	0.0719	-0.5195	0.1177	0.1186	-0.556	-0.407	-0.279	0.1826	0.0905	0.2689	0.0429	0.1567	-0.4549	-0.5632	0.1036	-0.1982	0.2237	0.2263	0.4519	0.2235	-0.3925	-0.5596	-0.3653	-0.2855	0.4526	-0.2445	0.0657	-0.2477	-0.6989	-0.4867	0.5105	-0.6994	-0.0184	0.113	-0.1165	-0.3919	0.2623	-0.1597	0.2755	0.2965	-0.196	-0.4331	0.1696
101194	-0.3081	-0.1728	-0.5312	0.0221	0.2083	0.0031	0.1313	-0.2717	-0.1558	0.108	-0.005	0.2234	0.0437	-0.0536	0.2296	-0.3572	0.0143	-0.7035	0.0912	0.2137	-0.4779	0.0155	0.099	0.0627	0.0544	0.5004	0.0228	0.1492	0.1647	-0.2065	-0.2225	-0.0149	0.6121	-0.0888	-0.2775	0.269	0.1211	-0.0174	0.1747	-0.3942	-0.2603	0.2374	-0.1829	0.3113	-0.254	0.3221	0.1204	-0.0313	0.282
101196	0.079	0.0946	-0.0595	-0.4808	-0.2619	0.3552	-0.0518	-0.6635	0.3219	-0.1584	-0.2549	0.1386	-0.5922	0.1698	0.2581	-0.0246	-0.2677	-0.2029	-0.6533	-0.6113	-0.0165	0.0512	-0.155	0.2469	0.1749	-0.0628	-0.165	0.2952	-0.1385	0.1992	0.6235	0.0113	0.4618	-0.13	-0.6141	0.0317	-0.4828	0.0525	-0.4199	-0.1573	0.1127	-0.0859	0.0642	0.2197	0.319	0.5302	-0.2667	-0.2059	0.2325
101213	0.1039	0.0405	-0.7318	-0.0823	0.0048	0.4856	0.5482	0.4051	0.0039	0.1999	-0.0302	0.0771	0.0944	0.1029	0.0884	-0.1362	0.0337	0.1972	0.3593	0.1244	-0.4201	-0.0874	-0.0281	0.0878	0.1582	0.2449	-0.0613	0.0779	-0.4779	-0.184	-0.3471	0.1699	0.4998	-0.2779	-0.3833	-0.5678	0.334	0.4162	0.2128	-0.0557	-0.3359	0.3339	-0.1689	0.1914	0.0839	0.4509	0.1553	-0.0435	0.0268
101220	-0.7969	1.0256	-0.9091	0.1372	0.7578	1.0754	0.8211	0.3263	0.9171	0.9365	0.1684	0.2189	0.8748	-0.6541	-0.275	0.6004	-0.5847	0.4378	-0.4768	0.621	0.4384	0.4145	-0.1416	-0.7757	0.8358	0.0492	0.5478	-0.1442	0.6924	-0.5888	-0.9882	0.5099	-0.1497	-0.0551	-0.7763	1.0027	-0.4201	0.6897	1.5342	-0.2935	-0.0533	0.3674	0.3242	-0.378	-0.3403	1.1907	0.0719	-0.1083	-0.0647
101239	-0.54	-0.081	-0.4264	0.1905	-0.1908	0.0737	0.1429	-0.2392	-0.2909	-0.1986	0.0672	0.2355	0.0017	-0.2152	-0.3645	0.0235	-0.0815	-0.498	-0.1315	0.1802	-0.5405	-0.0852	0.2323	-0.044	-0.5159	0.4794	-0.0188	-0.4015	0.2434	-0.3784	-0.5897	-0.005	0.2756	0.1183	0.4391	-0.2031	0.3227	0.5611	0.6474	-0.1183	-0.0763	0.9565	0.0164	-0.2144	-0.3469	0.2482	0.5162	-0.1611	0.0881
101252	-0.2147	1.304	0.9059	0.2462	-0.1637	-0.947	-0.4658	-0.0801	-0.0044	-0.7877	0.1479	0.2526	0.2529	-0.588	-0.3993	0.3533	0.3876	0.2529	-0.2612	-0.2627	0.2066	0.039	-0.2336	-0.3718	-0.3148	-1.5357	0.0662	-0.0501	-0.5941	0.8358	-0.7507	-0.0896	-0.0736	0.4212	0.4821	0.492	-0.1593	-2.1556	-0.8957	-0.0762	0.9243	-1.2562	-0.4973	-0.5823	0.2072	-1.3278	-0.8388	0.4373	-0.18
101255	1.0054	-0.4444	0.0387	-0.7164	0.3768	0.6041	0.1515	0.0675	0.1274	0.2362	-0.5359	-0.3625	-0.4956	0.2796	-0.0366	0.3269	-0.4385	0.1011	-0.4149	-0.2705	0.423	-0.0619	0.0603	0.2303	0.723	0.5823	-0.1449	-0.0892	-0.0214	-0.3923	0.3161	-0.1338	-0.3057	-0.2908	-0.5647	-0.5181	-0.223	-0.223	-0.5329	-0.1183	0.0028	-0.1836	0.2855	0.3508	0.6733	0.4216	-0.2313	-0.5025	-0.341
101266	0.3546	-0.138	-0.3987	0.2847	0.2088	0.2672	0.8257	0.7195	-0.1118	0.8484	-0.1032	0.0126	0.2641	-0.0082	0.7152	0.3144	0.6249	0.196	0.816	0.5148	0.1896	0.0066	0.3517	-0.1145	0.7717	0.7362	0.1875	0.1567	0.2989	-0.5944	-0.1457	-0.1764	-0.1308	-0.392	0.0037	-0.9196	0.8242	0.3229	0.7335	0.1521	-0.4046	0.5274	0.1871	0.4013	0.0278	0.8384	0.3074	0.1514	-0.2798
101287	-0.7535	0.2914	-0.5072	0.205	0.0658	-0.0279	-0.106	-0.3458	-0.1578	-0.3099	0.1393	0.5916	0.0554	-0.2052	-0.5903	-0.3098	-0.3289	-0.0216	0.268	0.2444	-0.2461	-0.1149	-0.2804	-0.0909	-0.2841	0.2527	0.1548	0.5588	0.2954	-0.2551	-0.7641	0.4266	-0.1161	0.4856	0.4046	0.0184	-0.0707	0.5168	0.4612	0.0557	0.0869	0.1869	-0.2308	0.2055	-0.5261	0.5745	0.475	0.128	-0.0781
101293	-0.2663	-0.6027	0.0919	-0.2027	-0.2718	0.0279	0.1104	-0.3317	0.0465	-0.1325	0.213	-0.0687	-0.0664	0.3035	0.1016	-0.2144	0.0425	-0.3711	-0.0065	-0.2252	-0.0824	0.4646	0.1991	0.118	0.019	0.5115	0.0481	0.4718	0.263	0.2085	0.2039	-0.0326	0.0432	-0.0674	-0.2198	0.1703	-0.0648	0.5426	0.0174	0.0546	-0.4046	0.1878	0.0333	0.75	0.2621	0.296	0.3194	-0.0102	0.6102
101300	0.0616	-0.0564	0.0148	-0.3254	-0.1249	-0.069	-0.0905	-0.5166	0.2788	0.1082	-0.2353	-0.0783	-0.1254	0.1698	-0.0172	-0.1248	-0.2234	-0.4164	-0.3607	0.061	-0.0093	0.0851	0.0554	0.2942	-0.3744	0.308	-0.0123	-0.2857	0.3916	-0.2213	0.1738	-0.0445	0.0127	0.237	-0.3043	-0.1837	-0.1437	0.4063	0.1246	-0.0559	-0.0418	0.1516	0.0953	0.2789	-0.2841	0.1019	0.1454	-0.1501	0.4548
101310	0.1369	-0.5741	-0.3957	0.1889	0.1342	0.1495	-0.035	0.0651	-0.0616	0.2545	-0.1478	0.1114	-0.0951	0.0527	0.1504	0.2633	0.0372	-0.2647	-0.219	0.3674	-0.2271	-0.0054	0.2347	0.0625	0.0297	0.2294	-0.1197	-0.3454	-0.0541	-0.6679	-0.042	-0.2177	0.0257	-0.1848	0.1348	-0.0645	0.3123	0.0873	0.6579	0.0453	0.0306	0.4507	-0.0956	-0.4821	0.1074	0.1981	0.1047	-0.0158	0.3749
101320	0.2868	-0.4104	-0.312	0.0026	0.1653	0.1444	0.1682	-0.1734	-0.1095	0.4775	0.087	0.0286	-0.001	0.0454	0.4106	0.1732	-0.1621	0.0635	0.2575	0.092	0.166	0.2122	0.1993	0.1087	0.412	0.3051	-0.0077	0.2935	0.4253	-0.1487	-0.0186	0.0623	0.0049	-0.1846	-0.1759	-0.1912	0.0625	0.2545	0.3996	-0.0044	-0.0399	0.4664	0.1829	0.3694	0.3064	0.365	0.1149	0.3055	0.1727
101331	-0.2477	1.5129	0.6464	0.0773	0.3531	-0.2561	-0.2679	-0.3267	-0.3762	-0.5658	-0.1724	-0.1739	0.1564	-0.1312	0.0364	0.3455	-0.3623	-0.101	-0.0496	-0.2617	-0.1856	-0.2939	-0.2489	-0.2437	-0.2741	-0.6289	-0.1187	-0.1984	-0.5087	0.8455	-0.2724	-0.1709	-0.1702	0.2915	0.6572	0.0792	-0.5509	-0.7055	1.1407	-0.2562	0.5298	-0.5706	-0.2509	-0.7082	-0.681	-0.854	-0.2495	0.4069	-1.0788
101333	0.0589	-0.5267	-0.4433	0.1325	0.0516	0.4476	0.0376	0.4783	0.0244	0.8129	-0.2626	-0.1459	-0.3688	-0.1611	0.2656	-0.1211	-0.036	-0.1168	0.3571	0.2818	-0.2685	-0.2214	-0.3342	-0.1016	-0.1156	0.3657	0.0467	0.6811	-0.1272	-0.2754	0.4572	-0.2719	-0.1605	0.2072	-0.329	-0.2932	-0.2119	0.2647	0.3456	-0.0525	-0.3348	0.4197	0.3836	0.3451	-0.0201	0.278	0.0622	-0.1356	0.3508
101339	-0.2488	-0.0331	-0.0224	0.0215	-0.37	0.3544	-0.2241	-0.0546	-0.061	0.1557	0.4614	0.1984	-0.1454	-0.1656	-0.0774	-0.415	-0.128	-0.1658	-0.022	-0.5063	-0.096	0.3483	-0.0089	-0.0052	-0.2306	0.0202	0.2569	0.3537	0.1386	0.2861	0.0441	0.2385	0.3816	0.0206	-0.0682	-0.0154	-0.1486	0.4664	0.072	0.0453	-0.2683	0.1282	-0.0475	0.2636	-0.1503	0.3709	-0.0847	-0.1659	0.4151
101365	0.0036	-0.4946	-0.7881	0.217	0.2317	0.3698	0.403	0.9501	-0.1645	0.4652	0.2184	-0.2006	0.2714	0.0535	0.2024	-0.547	-0.5514	0.405	0.3096	0.0856	-0.4028	-0.6824	-0.177	-0.2845	-0.1269	0.3907	-0.4504	-0.3468	-1.3704	-0.3844	-0.484	-0.4088	-0.5374	-0.697	0.1316	-0.4635	0.4808	0.1147	0.0434	-0.261	-0.4276	0.3443	0.4672	0.4019	-0.5452	0.2682	0.7702	0.1332	-0.371
101370	-0.2983	-0.0891	-0.4052	-0.5835	-0.5387	0.4266	0.0701	-0.3097	-0.0074	0.5883	0.0599	0.6015	-0.1355	-0.2319	0.1253	-0.4938	0.1333	-0.3155	-0.1348	-0.0611	-0.432	0.4598	-0.1091	0.0679	-0.0331	0.2792	0.3027	0.455	0.9608	-0.2567	0.221	-0.278	0.6422	0.0782	-0.0072	0.3708	0.1036	0.6018	0.7951	0.2964	-0.5726	0.616	-0.3092	0.3295	-0.279	0.211	-0.0953	-0.1612	1.0638
101377	-0.0854	-0.5103	0.3393	-0.0866	0.0928	0.0431	-0.3665	-0.1267	0.4989	0.108	0.1208	0.2185	0.1136	0.0123	-0.0028	-0.2724	0.0166	0.0278	-0.267	-0.0691	-0.0115	0.391	0.1877	0.0366	-0.5108	-0.0761	-0.3401	0.5164	0.6149	-0.276	0.3084	-0.0364	0.1452	0.1075	-0.1803	0.4771	-0.2834	0.2113	-0.1289	0.0607	-0.069	-0.2525	0.3005	0.32	0.0228	-0.1353	-0.0382	0.1559	0.7766
101381	-0.0691	-0.1659	-0.1301	-0.3019	-0.1759	0.218	0.0062	0.1104	0.5888	-0.2681	-0.0594	0.1071	-0.0989	0.1073	-0.0503	-0.3158	0.1561	-0.0001	0.1096	-0.2379	-0.2814	0.0223	-0.2973	-0.0561	-0.2044	0.2392	-0.3699	0.3289	0.2369	-0.0866	0.0609	-0.1558	0.1036	-0.1796	0.0222	0.0754	0.2004	0.6003	0.1915	0.0782	-0.1686	0.0815	0.002	0.278	0.2873	0.3964	-0.2227	-0.1781	0.4216
101397	0.6095	-0.091	-0.2846	-0.3101	-0.2376	0.3362	0.1872	0.148	-0.5632	0.3831	-0.6393	-0.013	-0.0277	-0.1348	0.2276	0.2132	-0.0584	0.0364	-0.0175	0.3737	0.2712	-0.1052	0.4	-0.0174	0.5564	0.3052	-0.3131	-0.083	0.0317	-0.3413	-0.1926	0.2499	0.0963	-0.6584	-0.7495	-0.4282	0.0688	-0.048	0.0966	-0.0975	-0.2441	0.596	0.2718	-0.0161	-0.4213	0.3859	0.2418	-0.6647	0.0183
101441	0.0948	-0.4287	-0.6028	0.3725	0.0363	0.0895	0.2663	0.7973	0.1598	1.0335	-0.3204	-0.2106	0.0752	-0.2454	0.3331	-0.161	0.2469	0.1319	0.618	0.4263	-0.3074	-0.4274	-0.0161	-0.353	-0.0023	0.1955	-0.5197	-0.2067	-0.0531	-0.7153	-0.137	-0.5921	-0.3024	-0.8864	0.1001	-0.7182	0.5479	0.155	0.9084	-0.296	-0.487	0.5834	0.1386	0.0903	-0.6804	-0.2441	0.421	-0.2265	0.0662
101445	0.2645	0.1265	-0.2242	0.4015	0.215	-0.0454	0.0459	0.2622	-0.4499	0.1951	0.2357	-0.0791	0.2473	0.1323	0.3489	-0.0132	-0.567	-0.3104	-0.1357	-0.3909	-0.2633	0.0615	0.5985	0.0057	-0.0816	0.0066	0.0823	-0.8925	-0.3113	-0.0761	-0.2461	0.0814	-0.1119	-0.0787	-0.0394	-0.0174	-0.2505	-0.2565	0.22	-0.1806	-0.3348	0.2743	-0.077	0.1502	-0.7097	0.2849	0.4258	0.0547	-0.2246
101447	0.1156	-0.138	-0.0177	-0.4656	0.4832	0.2615	-0.0368	0.035	0.142	1.2065	-0.0568	-0.1849	-0.5934	0.1451	0.3248	0.369	0.0571	0.8901	0.2483	0.0128	0.0794	-0.2233	0.0234	0.3731	-0.0447	0.5681	-0.0065	0.4333	0.8264	-0.6243	-0.1974	0.3006	-0.3803	-0.4343	-0.5806	-0.2291	-0.0553	-0.3083	0.2026	-0.2437	-0.3122	0.9105	0.0561	0.4503	-0.4398	0.3208	-0.0336	-0.318	0.1065
101487	-0.5722	0.1521	0.5893	0.6326	0.3717	-1.1155	0.1187	-0.2384	-0.4964	-0.3804	0.0844	0.0173	0.1466	-0.2026	0.1385	0.3479	0.1235	0.0987	-0.0832	-0.0339	0.0549	-0.0126	-0.1799	-0.15	-0.3577	-0.2626	0.1779	-0.6909	-0.4147	0.32	-0.2016	0.1045	-0.1402	0.5616	0.1414	0.0688	0.0778	-0.5615	-0.5219	-0.2601	0.4649	-0.2125	0.138	-0.4506	-0.0131	-0.6386	0.1319	0.4083	-0.6774
101499	0.2392	-0.609	0.6649	-0.6309	-0.1372	-0.0728	-0.1974	-0.1305	0.2103	-0.077	-0.1516	0.1309	0.0355	0.2167	-0.5741	-0.1617	0.3685	-0.4887	-0.3337	-0.2014	0.0071	0.31	0.0016	0.218	0.2874	0.1439	-0.1388	-0.0192	0.7564	-0.0435	0.3537	-0.1282	0.0352	-0.0147	-0.6232	0.3898	-0.5001	0.1815	-0.4062	-0.0117	0.0672	0.1369	-0.0574	0.095	0.2611	0.065	-0.1213	-0.3098	0.0427
101505	-0.3272	-0.8891	-0.8317	0.1461	0.0365	0.3579	0.2489	-1.2114	-0.3259	-0.8875	-0.1487	-0.0715	-1.6735	0.1914	0.1802	-0.0283	-0.034	-0.7829	0.733	-0.103	-0.2141	-0.1238	-0.903	0.0027	-0.0159	0.2088	0.2178	-1.4826	0.1028	-0.6092	-1.0989	0.1803	0.4654	-0.5836	0.9045	-0.2878	0.1642	0.6291	0.5503	-0.3388	-0.9123	1.1046	-0.3653	-0.8124	-0.6157	0.0405	0.3996	-0.4194	0.9452
101511	-0.1215	-0.4786	-0.1802	0.1444	-0.2038	0.0813	0.1185	-0.1274	0.0371	0.3093	-0.4257	-0.0211	-0.734	0.1778	0.5731	0.0602	0.3027	-0.3782	-0.1912	-0.073	-0.0295	0.0293	-0.2795	-0.0174	-0.053	0.2662	0.0217	-0.0859	0.6921	-0.3052	-0.2463	-0.3093	-0.3295	-0.7099	-0.3121	-0.2439	0.3145	0.5004	0.3893	-0.1657	-0.2294	0.1806	-0.2376	0.0666	-0.2444	0.4993	0.0375	-0.4105	0.4359
101526	-0.3898	-0.6248	-0.0016	-0.1179	-0.047	0.1857	0.079	0.2433	0.0348	-0.3838	0.537	0.5084	-0.1673	-0.1476	-0.2718	0.1202	0.0573	-0.3107	-0.0277	0.052	-0.186	0.4216	0.5606	0.1035	-0.0683	0.2144	0.1009	0.4971	0.7744	-0.2311	0.0135	0.1481	0.1828	0.4571	0.1496	0.5508	-0.1519	0.2522	0.0256	0.0496	0.222	0.1307	0.1096	0.2501	0.0266	0.3586	0.2689	0.2615	0.4506
101574	-0.5921	0.4976	-0.3022	-0.8097	0.2222	0.4828	-0.5179	-0.2257	-0.604	-1.1524	-0.0164	-0.1138	-0.2775	0.0629	0.6504	0.4838	-0.4235	0.1161	-0.0096	-0.5002	-0.0714	0.025	0.6558	0.4131	-0.115	-0.3284	0.5869	-0.8344	-0.432	0.7017	-1.0335	0.4357	0.9495	0.1204	-0.2197	1.0281	-0.1443	0.2941	0.3861	0.1591	0.3306	-0.5333	-0.6807	-0.5879	0.6984	-0.5455	0.0812	-0.3931	-0.2419
101588	0.4107	-0.2631	-0.3996	0.0062	0.182	0.3223	-0.0085	0.8848	0.3179	0.8679	0.0771	0.12	0.2176	-0.0168	-0.0257	-0.1875	-0.0524	0.4391	0.3283	0.2537	-0.2676	-0.0293	0.1335	-0.1562	-0.04	0.3537	-0.1169	0.2926	-0.1274	-0.5723	0.2018	-0.1511	-0.0845	0.0576	0.0037	-0.2294	0.2736	0.0592	0.1869	-0.0387	-0.3277	0.1508	0.1257	0.4394	-0.0396	-0.072	0.1296	-0.1117	0.1002
101611	0.5317	-0.2805	-0.0064	0.0663	0.2859	0.4692	0.5959	0.9688	0.1732	0.8792	0.0159	0.0626	0.1315	-0.3486	0.5555	0.309	0.47	0.2074	0.4513	0.2256	0.2714	-0.211	0.1124	-0.2347	0.1731	0.2326	0.0023	0.2611	-0.039	-0.7307	0.2923	-0.2646	-0.2836	-0.1348	-0.4048	-0.1338	0.2326	-0.3177	0.3182	0.0735	-0.6169	0.3307	0.3505	0.3174	-0.0354	0.0298	0.0765	-0.0402	-0.126
101623	-0.3268	1.0281	0.7929	0.2172	0.0997	-0.8891	-0.5659	-0.1113	0.0641	-0.4825	0.1208	0.0536	0.2924	-0.5739	-0.1621	0.2949	0.4389	0.2932	-0.0039	-0.1935	0.245	-0.0325	-0.0509	-0.3309	-0.1852	-1.683	-0.1107	-0.333	-0.0826	0.6756	-0.6325	-0.1628	0.3029	0.2279	0.5113	0.3684	0.1383	-1.8959	-0.7725	-0.0564	0.784	-0.9481	-0.4803	-0.6355	0.3495	-1.2186	-0.8371	0.3967	-0.712
101645	-0.2419	-1.2401	-0.3099	0.0818	-0.1735	0.1217	-0.1477	-0.0982	0.1994	-0.5264	0.1286	0.181	0.0778	0.3483	-0.0671	0.5481	0.1732	-0.9657	0.0531	0.3581	-0.2968	-0.2853	0.5654	-0.0335	0.2419	0.432	0.2873	-0.4649	0.0307	-0.15	-0.158	0.3738	0.6123	0.0026	0.1784	0.7575	0.2898	0.3271	0.5416	0.203	-0.2846	0.2188	0.0073	-0.5892	-1.0691	0.1358	0.8609	-0.4306	0.1701
101648	0.3353	-0.3619	-0.1313	-1.2376	0.9801	-0.0179	-1.1852	0.1392	1.314	0.7825	-1.5677	-0.9254	-0.0467	0.3867	-1.3948	-0.5107	-0.0456	0.7253	-0.3594	0.9558	-0.3194	-0.9752	-0.5058	0.3603	0.4537	0.7236	-0.4959	0.3753	-0.0355	-0.9733	0.5875	-0.7993	-0.0647	-1.2906	-0.0313	-1.3428	0.0357	-0.8111	-0.5054	-0.8293	-0.9305	-0.2312	-0.7938	-0.4792	-0.079	-1.4171	0.1072	-1.4346	-0.3964
101664	0.3947	-0.1025	0.0419	0.1206	-0.1558	0.3342	-0.1228	-0.2668	0.6496	-0.1445	-0.0858	0.1801	0.042	0.004	-0.4213	-0.3553	0.1421	0.0365	-0.0815	-0.3891	-0.5193	0.0602	0.0524	-0.2035	-0.4846	0.1524	-0.1551	0.396	-0.4375	-0.6446	0.2415	0.2726	-0.0096	0.4498	-0.1884	0.2741	-0.3596	0.3086	-0.0977	0.1002	-0.0538	0.2835	0.3402	0.0012	-0.1904	0.3373	-0.1114	-0.3426	-0.0088
101670	-0.3359	0.2834	0.278	0.2087	-0.0029	0.5865	-0.1993	0.673	-0.1612	0.4328	-0.1	0.2228	0.483	-0.0273	-0.0661	-0.4484	0.1478	0.3662	0.2711	-0.3657	-0.434	0.3532	0.6998	0.4495	0.2661	0.4755	0.3543	0.2489	0.5388	-0.5558	0.6008	0.3659	0.3591	0.1271	-0.4427	-0.4239	0.1119	0.7061	0.4012	0.7516	-0.5384	0.3497	0.3683	0.2651	-0.1859	-0.3959	0.2586	0.3394	0.2719
101676	0.2768	-0.2477	0.2688	0.144	0.1844	0.4369	0.2003	0.3082	-0.0132	0.1766	0.14	0.1464	0.1644	-0.1389	0.1882	0.1017	-0.0796	0.2222	0.2854	-0.0545	0.183	0.3742	0.2598	-0.0258	0.2043	0.36	0.1678	-0.0394	0.6883	-0.0767	0.1478	0.1475	-0.0963	0.0922	-0.2987	-0.1207	0.2716	0.4755	0.1603	-0.203	-0.2697	0.4913	0.1841	0.2934	-0.066	0.7138	0.2466	-0.146	0.2291
101686	0.8069	0.061	0.4278	-0.3112	-0.0432	0.9094	0.1522	-0.2891	0.4383	-0.3913	-0.1542	0.2218	-0.3396	-0.0605	-0.2094	0.1461	-0.2318	-0.0091	-0.5214	-0.0947	0.075	0.0978	0.1135	0.092	0.5464	-0.0084	0.0641	-0.2415	0.377	0.2027	0.4705	0.3154	0.0294	0.077	-0.8864	-0.4706	-0.2113	0.4174	-0.1246	0.0125	-0.053	0.0459	0.1943	0.1776	0.1984	0.4906	-0.1379	-0.0434	0.2568
101687	-0.2043	-0.4369	-0.1832	0.371	0.1085	0.4469	0.154	1.0598	0.6368	0.8759	0.1127	0.345	0.2845	-0.2898	0.2051	-0.0765	-0.28	0.1519	0.5514	1.8	-0.2667	-0.4362	-0.1472	-0.5301	-0.7015	0.135	-0.1411	0.2852	-0.314	-0.0451	1.2373	-0.6136	-0.2254	-0.2989	0.264	0.121	0.0879	0.4293	0.7939	-0.1187	-0.609	0.4229	0.2373	0.0995	-0.1723	0.1539	0.0058	0.2377	0.4181
101692	0.1326	-0.1605	-0.3043	0.0753	0.2519	-0.1748	-0.0321	0.6063	0.1907	0.4505	-0.1189	0.0502	-0.0209	-0.1237	-0.2835	0.0151	-0.8565	0.1628	-0.0981	0.2044	-0.0448	-0.5369	0.333	-0.2965	-0.079	-0.2154	-0.3546	-0.9924	-1.3039	-0.405	-0.1545	-0.0959	-0.3305	-0.0431	0.1611	-0.1503	0.3699	-0.2585	0.1113	0.1403	-0.0458	-0.2121	0.2245	-0.3533	-0.2112	-0.1339	-0.0577	0.0306	-0.2308
101693	-0.0559	0.1682	-0.2781	-0.0035	-0.1957	0.3587	-0.0236	-0.0794	-0.1016	-0.2212	0.1434	0.358	-0.0776	-0.0088	-0.1597	-0.0479	0.1755	-0.2074	0.1721	-0.3952	0.0209	0.2529	0.1097	0.1205	0.0302	0.2416	0.268	0.3175	0.2031	0.0289	0.1957	0.0045	0.2568	0.0555	-0.1089	0.1722	0.1469	0.6308	0.0874	-0.1568	-0.1781	0.2051	0.0324	0.4118	0.2401	0.4889	0.0018	0.1274	0.0445
101703	0.8473	-0.2422	0.2833	-0.5301	0.1002	0.5948	0.5009	-0.2311	-0.0999	-0.6986	-0.233	-0.0399	-0.0146	0.5352	0.1118	0.3941	0.1875	0.21	-0.4317	-0.3313	0.5983	0.3966	0.3528	0.1828	0.2981	0.2658	0.3588	-0.6014	-0.2577	-0.3292	0.4833	0.2303	-0.0206	-0.1186	-0.7155	0.2343	-0.3278	0.3269	-0.0921	0.1543	-0.3432	0.1064	0.1474	0.2822	0.3658	0.8837	0.4473	0.0224	-0.06
101711	-0.0845	-0.0816	-0.5091	0.0853	0.1459	0.2417	0.0591	0.2768	-0.1972	0.112	0.0856	0.3024	0.144	-0.1086	-0.3453	-0.1019	-0.1501	-0.0963	0.3556	0.0727	-0.3631	0.1742	0.0623	-0.1929	-0.013	0.2077	0.2617	-0.0054	-0.0229	-0.4915	-0.1929	-0.0026	0.2496	0.0714	0.088	-0.0155	0.2722	0.4063	0.389	0.0676	-0.3558	0.2875	0.0407	0.2215	-0.0749	0.2643	0.1615	0.1206	0.1743
101725	0.1921	-0.688	-0.5738	-0.1547	-0.0608	0.2842	0.5027	-0.3495	0.1891	0.8646	-0.377	0.0149	-0.6851	-0.1419	0.5644	-0.1188	0.1653	-0.1053	0.3993	0.2151	-0.2095	-0.4169	-0.5916	0.2998	-0.1648	0.6368	-0.1081	0.0485	0.1279	-0.4606	-0.7333	-0.7476	0.2837	-0.5699	0.3327	0.0549	0.4483	0.0384	0.96	-0.5765	-0.5136	0.3081	-0.2145	-0.1579	-0.455	-0.2156	0.3066	-0.4897	0.0228
101754	0.0236	-0.6642	0.3125	-0.1446	-0.2386	0.2366	-0.0972	-0.0571	-0.1147	-0.1508	0.017	0.2366	0.1109	0.297	0.0005	-0.0033	0.5787	-0.1938	0.1405	-0.0821	-0.2035	0.4493	0.2091	0.3831	0.0488	0.2066	0.1298	0.4251	0.7525	0.0361	0.1814	0.1699	0.3581	0.373	-0.2733	0.1021	0.0354	0.5275	0.1963	-0.115	-0.0072	0.2112	-0.1427	0.3043	0.2546	0.3261	0.1486	0.116	0.2498
101755	0.1073	0.0957	-0.0047	-0.0355	-0.1318	0.3705	0.2159	0.1203	0.0981	-0.1165	0.0368	0.0922	-0.2609	-0.0654	0.3438	-0.1947	0.0105	-0.1557	0.146	-0.4148	0.0124	0.0676	0.1777	0.0212	-0.0979	0.2868	-0.0432	0.2382	0.0625	-0.0976	0.0872	0.0217	0.1811	-0.144	-0.2533	0.0562	0.2238	0.4501	0.2279	0.0121	-0.2471	0.1908	-0.1405	0.3478	0.2503	0.6017	-0.028	-0.0935	0.3395
101781	0.126	0.206	-0.3049	0.0666	-0.0773	0.2522	0.2602	0.4236	0.134	0.4489	0.0006	0.3402	0.5285	-0.0258	0.2894	-0.0826	0.6736	0.2678	0.3934	0.3719	0.0046	0.1979	0.0943	-0.0875	0.1679	0.026	0.1741	0.3917	0.7836	-0.1221	-0.1468	-0.0428	0.0642	-0.3043	-0.0688	-0.0863	0.4684	0.5809	0.5497	0.0011	-0.3824	0.3045	-0.0645	0.1326	-0.0713	0.3644	0.3106	0.3484	0.1449
101798	-0.2411	0.0765	0.3213	-0.3425	-0.3789	-0.3532	-0.4812	0.4659	0.3941	-0.5177	-0.4259	-0.0049	-0.1764	0.0169	-0.2616	-0.089	0.4017	0.1347	-0.2079	0.3368	0.2901	0.1092	-0.4659	0.3408	-0.5593	-0.4222	-0.6034	0.2776	0.5929	-0.0987	0.0231	-0.0954	0.0256	-0.5198	0.3686	0.0251	0.1975	-0.2618	-0.1923	-0.5465	0.5244	0.0752	-0.5645	-0.3727	0.1142	-0.3222	-0.3422	-0.5401	0.3304
101811	-0.4978	-0.5727	-0.7022	0.272	-0.2238	0.3816	0.1422	0.1385	-0.1094	0.4058	-0.2048	0.0624	-0.2191	-0.3015	0.2262	-0.4149	0.2082	-0.4076	0.4695	-0.2467	-0.2928	-0.1604	-0.4029	-0.1218	-0.381	0.3089	-0.2513	0.3322	-0.1346	-0.0454	-0.4808	-0.1575	0.1697	-0.4402	0.1892	-0.4912	0.4708	0.2148	0.4813	-0.3123	-0.479	0.4807	-0.4318	0.1692	-0.4931	0.1039	0.0891	-0.3524	0.4142
101815	-0.3013	-0.4167	-0.8639	0.6973	-0.0171	0.3387	0.4493	0.186	-1.1535	-0.2061	-0.1394	0.1635	0.3711	0.3315	-0.0172	-0.7246	-0.444	-0.3887	0.5439	0.3408	-0.0386	0.1298	0.2657	0.2715	-0.0488	0.9404	0.3877	-0.0782	-0.8095	-0.7736	0.0712	-0.0032	-0.1553	-0.477	-0.5441	-0.1364	0.5368	-0.172	-0.065	-0.5408	-0.2591	0.8246	0.1061	-0.1986	-0.604	0.759	0.5007	-0.6771	-0.0952
101835	-0.1579	-0.318	0.1552	-0.2353	-0.1707	0.0991	-0.0825	-0.2851	-0.0682	-0.3459	0.1064	0.0014	0.0191	0.222	0.0991	0.0884	-0.076	-0.1591	-0.3398	-0.1891	-0.0663	0.2273	0.3439	0.2778	0.2175	0.1748	0.1705	-0.3496	-0.2372	0.1547	0.2634	0.4152	0.0802	0.647	0.0565	0.1483	-0.6137	0.3925	-0.0211	0.2035	-0.1472	-0.2125	0.0992	0.1994	0.2977	0.1757	0.1251	-0.1646	0.3043
101844	0.0441	-0.3875	-0.987	0.3216	-0.0198	0.6966	0.4727	0.9563	0.5482	0.9488	0.0117	0.2697	0.048	-0.2028	0.419	-0.2933	0.3123	-0.0746	0.6911	-0.2796	-0.4011	-0.4432	-0.0204	-0.4063	-0.0916	0.2539	0.0008	0.5016	-0.0918	-0.4585	0.1626	-0.3663	0.3529	-0.7861	-0.107	-0.4396	1.1566	0.539	0.9716	-0.4098	-0.6619	0.7433	-0.0814	0.5686	-0.7663	0.4366	0.6128	-0.2162	0.6183
101862	0.4013	0.1903	0.4658	-0.3976	0.7816	0.4226	0.1766	-0.2192	0.2114	0.1264	-0.075	-0.2842	-0.2988	-0.2718	-0.0424	0.2374	-0.0261	-0.0448	-0.0454	0.2121	0.2237	0.2833	0.0698	0.3355	0.0075	0.167	-0.1068	-0.2802	-1.0204	0.138	0.2408	-0.0668	0.292	0.0123	-0.488	0.0441	-0.1256	0.1306	0.4097	-0.2806	-0.0804	0.3641	-0.062	-0.2976	0.5867	0.5171	0.2698	-0.2864	-0.0692
101867	0.2391	0.3221	-0.5082	0.0649	0.1117	0.4367	0.2505	1.4826	0.4261	1.0182	0.0927	0.1703	0.3112	-0.1863	0.0352	-0.3079	-0.1204	0.3604	0.6184	0.5321	-0.246	-0.5087	-0.0468	-0.2615	-0.5868	0.2404	-0.6444	0.6674	-0.0935	-0.8817	-0.0915	-0.6974	-0.5757	-0.4902	0.0709	-0.651	0.3432	0.4648	0.2908	-0.1584	-0.3348	0.6578	0.5267	0.5553	-0.6455	0.0332	0.4593	0.1356	-0.3355
101887	0.6935	-0.2796	0.1997	-0.4965	-0.1303	0.0049	0.1691	-0.5592	0.065	-0.1372	-0.4974	-0.1621	-0.2107	0.2064	-0.1424	0.1222	-0.3282	-0.278	-0.4101	0.1716	0.0103	-0.1293	0.0658	0.4525	0.5518	0.5401	0.0242	-0.2314	0.3823	-0.028	0.2086	-0.1655	-0.0221	-0.2376	-0.3745	-0.3179	-0.1993	0.0794	-0.5634	-0.2136	0.2316	-0.1569	0.2909	-0.0628	0.0667	0.0906	-0.2159	-0.5711	0.1933
101893	0.1036	0.3955	-0.074	-0.3369	-0.3546	-0.0172	-0.017	-0.447	0.117	0.1648	-0.1743	0.0775	-0.2972	-0.0025	0.4047	-0.213	-0.2774	-0.038	-0.1343	-0.2345	0.0771	-0.0194	-0.3062	0.0573	0.0244	0.1403	-0.2234	0.2725	0.3777	-0.2456	-0.0741	-0.3778	-0.2353	-0.1641	-0.5384	0.1996	0.112	0.1038	0.094	-0.1953	0.1175	-0.0121	0.0848	0.3109	0.2951	0.3469	-0.4447	-0.3341	0.3026
101931	-0.1589	-0.1807	-0.288	0.0857	-0.1259	0.2641	0.171	0.3057	-0.0098	0.2079	0.1632	0.1255	0.1143	-0.0506	0.0569	-0.1314	0.4554	-0.1833	0.4353	0.0014	-0.2438	0.1128	0.0299	-0.0303	-0.0691	0.1446	0.1393	0.3073	-0.185	-0.1558	0.0648	-0.0067	0.1941	-0.0751	0.0212	-0.1461	0.1815	0.0501	0.3257	-0.1709	-0.2351	0.4489	-0.0729	0.3033	-0.2594	0.2246	0.2568	-0.0257	0.4594
101946	-0.0656	0.0041	-0.1392	0.0555	0.0085	0.1878	0.1002	0.2691	-0.0082	0.1183	0.1741	0.2631	0.1484	-0.0005	0.0623	-0.0059	-0.0268	0.0867	0.2003	0.0401	-0.1046	0.2192	-0.0204	-0.0646	-0.1475	0.0834	0.2323	0.2478	0.4473	-0.1051	-0.0829	0.1398	0.1078	0.023	-0.0464	0.1721	0.0022	0.5531	0.2811	0.1195	-0.1843	0.2145	-0.1502	0.1829	0.0103	0.1996	0.2169	0.1392	0.3803
101958	0.5836	-0.2878	0.3156	-0.2981	-0.276	-0.1007	-0.1331	-0.614	0.0136	0.0623	-0.1416	-0.2726	-0.1912	0.2933	0.3337	-0.0059	-0.0452	-0.4103	-0.3519	-0.1726	-0.1577	0.2733	0.4227	0.3401	0.1933	0.2115	0.0713	-0.0306	0.4196	0.0552	0.2843	0.0035	0.1504	0.1722	-0.1619	0.6589	-0.2805	0.1638	-0.2769	0.1071	0.0367	-0.271	-0.0278	0.3404	0.3098	0.1099	-0.0388	-0.1494	0.7948
101973	0.1548	0.6873	-1.0046	-0.8489	0.4623	1.0623	-0.6742	1.0261	0.4426	1.1617	-0.5126	-0.0984	-1.5246	-0.5288	0.1797	0.264	-0.9868	0.6138	0.7456	0.3857	-0.1607	-0.657	-0.3052	-0.563	-0.4322	-0.512	-0.1089	-0.8337	-0.4772	0.0304	-1.3845	0.1099	0.473	-0.6279	-0.6689	0.3371	0.4047	-0.4254	1.0399	-0.1463	-0.2244	-0.4621	-1.3063	-0.2142	0.422	-0.7101	0.0407	-0.3833	-0.3649
101974	0.4414	-0.4461	-0.3064	-0.1274	0.1611	0.1087	0.0583	0.3403	0.2238	0.7333	-0.1074	-0.1296	0.0729	0.0175	0.3704	0.0586	0.0932	0.2142	0.2015	0.4494	0.123	-0.141	-0.0008	-0.025	0.4808	0.1266	0.032	0.1893	0.3968	-0.5283	0.1313	-0.3073	-0.0004	-0.1788	-0.0981	-0.2941	0.2591	0.455	0.3888	-0.0013	-0.1555	0.3741	0.2494	0.2402	0.0163	0.3251	-0.0237	0.049	0.1192
101985	0.1489	-0.1082	-0.4581	0.2395	0.172	0.4323	0.4779	0.4827	-0.0704	0.3544	0.2569	0.1525	0.1137	0.0667	0.2451	0.019	0.3622	0.0557	0.5469	0.1847	-0.0004	0.2829	0.0953	-0.0839	0.339	0.2432	0.2983	0.2426	0.3023	-0.0372	0.0579	0.0392	-0.0861	-0.3864	-0.2069	-0.2242	0.2473	0.5139	0.2482	-0.0542	-0.3278	0.5076	0.053	0.344	0.078	0.417	0.2138	0.2388	-0.0428
101987	-0.367	-0.283	-0.4206	0.1622	0.0511	0.3759	0.1676	0.1202	-0.2518	0.1734	0.101	-0.0228	-0.1483	-0.0207	0.5533	-0.0764	0.0308	-0.1432	0.1943	0.2444	-0.1176	-0.0774	-0.2981	-0.1001	-0.1071	0.0133	0.1163	0.1059	0.0024	-0.255	-0.6854	1.2781	0.1803	-0.0698	0.0969	-0.2566	-0.0802	0.7641	0.4129	0.075	-0.2548	0.4656	0.0107	0.1476	-0.1354	0.3885	0.102	-0.0436	0.0679
102001	-0.2408	-0.2412	-0.6577	0.4795	0.2598	0.1384	0.391	-0.0939	-0.1136	-0.0498	-0.6016	0.0411	-0.2644	0.1335	0.3243	0.2491	0.3162	-0.4215	0.066	0.1521	-0.3051	0.03	-0.1661	-0.4632	0.0459	0.0036	0.2654	-0.9703	-0.1545	-0.4075	-0.9629	0.1719	0.1228	0.0265	0.2206	-0.2059	0.3864	0.7149	1.1997	-0.0542	-0.0595	1.0247	-0.3515	-0.7102	-0.6416	0.8077	0.3581	-0.2555	0.912
102037	-0.1598	-0.7475	-0.1311	0.2244	0.0306	0.3147	0.3816	-0.0421	-0.5612	0.0644	0.3817	-0.1675	0.3789	0.0426	0.2565	-0.0178	0.1972	0.0026	0.0617	-0.474	-0.0327	0.1306	0.6042	0.2623	0.2964	0.5127	0.184	-0.0245	-1.1887	0.1476	-0.002	0.1141	-0.0056	-0.3417	-0.1413	-0.5581	0.1349	-1.3514	-0.0695	-0.0831	-0.1963	-0.2731	0.1342	0.4361	0.0942	0.2478	0.3016	-0.0396	-0.0586
102040	0.9534	-0.243	0.3459	-0.3713	0.3255	-0.0684	0.2358	-0.1373	-0.3623	0.1842	-0.8217	-0.2471	-0.6966	0.5785	-0.1205	0.3799	-0.1912	-0.1183	-0.3953	-0.2399	-0.3725	0.4285	0.4402	0.3355	0.2342	0.5642	-0.0283	-0.4579	0.1577	-0.3409	-0.1557	-0.3578	-0.3658	-0.1897	-0.8238	0.2974	0.0269	0.5288	0.1035	0.326	-0.1097	0.2537	0.6264	-0.7361	0.4531	0.6454	-0.1379	-0.1111	0.0136
102046	-0.3204	0.7464	0.9646	0.1995	-0.0048	-0.9853	-0.5024	-0.4798	-0.2197	-0.7785	0.0316	-0.281	0.2123	-0.2579	0.066	0.2478	0.4751	0.0049	-0.449	-0.4793	0.2967	-0.0533	-0.0912	-0.2756	-0.0184	-1.3761	0.0422	-0.4661	-0.3475	0.8547	-0.395	0.1171	0.0298	0.3964	0.4535	0.6222	-0.4735	-1.2565	-0.6918	0.2371	0.8238	-0.8343	-0.4044	-0.684	0.0866	-1.1434	-0.4931	0.2708	-0.5263
102047	-0.2797	0.7862	1.126	0.049	-0.0075	-0.8298	-0.5016	-0.424	-0.2645	-1.036	0.1082	-0.3599	0.1571	-0.1705	-0.0158	0.2625	0.3551	0.2561	-0.2997	-0.4042	0.2504	-0.051	-0.0727	-0.3411	0.0462	-1.5771	0.0879	-0.5777	-0.5849	1.0067	-0.4483	0.2424	-0.0356	0.4607	0.5516	0.6613	-0.5435	-1.298	-0.792	0.2341	0.7216	-1.0672	-0.2859	-0.5644	0.1104	-1.0261	-0.5047	0.2731	-0.5004
102060	0.0055	-0.3869	0.6943	-0.3102	-0.3388	-0.2141	-0.3526	-0.0454	0.5239	0.0423	-0.5466	-0.2764	-0.5121	0.2847	0.457	0.2758	-0.4537	-0.3303	-0.6674	-0.0644	-0.4043	0.5306	0.5464	0.6316	-0.7854	0.2743	0.1122	0.3546	0.5719	0.2074	0.3313	-0.92	0.2369	0.0961	-0.7559	0.6145	-0.2408	-0.018	-0.0373	0.2361	-0.0467	0.3092	-0.1515	-0.4788	0.5338	-0.1069	-0.4362	0.2847	1.3051
102086	-0.9912	-0.2474	-0.0162	0.4659	-0.0083	0.5555	-0.2338	0.3783	-0.5084	-0.061	-0.0762	1.465	1.038	-0.2972	0.0237	-0.5708	-0.3758	-0.7715	0.1713	-0.2644	-0.0678	-0.1541	-1.1806	-0.6558	-0.68	0.4993	0.1173	0.0043	-0.7765	-0.2013	-0.7432	-0.3556	0.0556	-0.1717	0.1608	-0.7576	0.2246	0.1243	0.9215	-0.1913	-0.0524	-0.0034	-0.4556	0.7531	-0.8065	0.8803	0.2178	0.8929	-0.1669
102092	0.0631	0.3275	0.6768	-0.0367	-0.3216	-0.277	0.12	-0.5466	0.2077	-0.7769	-0.2152	-0.0205	-0.0151	0.0897	-0.1464	-0.065	-0.4336	-0.4597	-0.1352	0.0971	-0.0191	-0.0108	-0.2462	-0.17	-0.321	0.1973	-0.0118	-0.2012	0.4544	0.4475	0.4053	0.3813	-0.3002	-0.0069	-0.2125	0.1774	-0.6209	-0.0794	-0.1794	0.2824	0.2092	-0.348	-0.0049	-0.2524	-0.0929	-0.1198	0.1432	-0.0741	-0.472
102117	0.311	-0.6269	0.5693	-0.2214	-0.0154	0.2361	-0.3702	0.6373	0.3164	0.7129	0.0069	-0.0643	0.834	0.1249	-0.0564	-0.3028	0.5555	0.2796	0.315	-0.0591	0.0916	0.2896	0.481	-0.208	0.0877	0.2494	-0.1816	0.2302	-0.1104	-0.2874	0.8644	-0.3057	0.2547	-0.4	-0.2821	0.152	0.438	0.1297	-0.0375	0.3686	-0.998	-0.2101	0.3106	0.5885	0.0746	-0.4616	-0.111	0.2285	0.5874
102125	0.4862	-0.1902	0.3267	-0.3912	-0.2045	0.3669	-0.1067	-0.1727	0.1076	-0.2088	-0.0963	-0.1689	-0.1542	0.1222	-0.2014	-0.0587	-0.1888	0.0086	-0.3038	-0.1849	0.2298	0.0137	0.0153	0.309	-0.0308	0.1805	0.0698	0.0119	0.2708	-0.0619	0.3311	-0.031	0.1873	-0.1189	-0.3095	-0.0717	-0.0231	0.1875	-0.7756	0.0377	0.0747	0.0091	0.0628	0.1428	0.516	0.2232	-0.2622	-0.2576	0.3111
102133	-0.337	-0.4098	-0.6046	0.1307	-0.0444	0.1287	0.0157	0.1153	0.0736	0.17	0.3413	-0.052	-0.3292	-0.1266	0.1103	-0.0322	0.21	-0.434	0.0867	0.1188	-0.2166	-0.0004	-0.2933	-0.0267	-0.2882	0.2986	0.0643	0.3836	-0.0821	-0.3054	-0.0813	0.1592	-0.0056	-0.2133	0.1815	-0.1534	0.1407	0.2753	0.6023	-0.1505	-0.2685	0.6574	-0.0915	0.1335	-0.5239	0.3748	0.1043	0.0237	0.2573
102161	-0.3633	-0.0776	-0.6627	-0.193	0.3465	0.3656	0.1655	0.1918	0.2149	-0.2028	0.3775	-0.1133	0.0137	0.1865	-0.2162	-0.3211	-0.0568	-0.784	-0.1755	-0.242	-0.3078	-0.0799	-0.2229	-0.0896	-0.0576	0.0824	0.2139	-0.0013	0.1279	0.1419	-0.1664	0.2589	0.3433	0.238	0.0177	-0.2004	-0.1275	0.6724	0.3067	0.1741	-0.2723	0.1526	-0.0641	0.0084	-0.5086	0.478	0.2147	-0.1735	0.1774
102175	-0.4624	-0.3044	-0.7558	0.1244	-0.2337	0.3673	0.1161	-0.03	-0.3307	-0.1231	0.2778	0.2988	-0.0476	-0.0733	-0.3294	-0.1681	-0.255	0.2079	0.0877	-0.3237	-0.1685	0.0001	-0.1384	-0.2225	-0.0869	0.0016	0.2637	0.6099	0.5763	-0.1388	-0.5068	0.1322	0.1217	0.0014	0.2943	-0.0988	-0.0488	0.5823	0.0919	-0.0837	-0.2794	0.3328	0.0908	0.1824	-0.3437	0.378	0.0792	0.2354	0.1026
102183	0.0259	-0.7645	0.3077	-0.2257	-0.3141	0.0572	-0.1601	-0.4307	0.4097	0.1865	-0.482	-0.3776	-0.5987	0.1474	-0.1483	-0.7133	-0.1008	-1.0281	-0.2666	-0.9532	-0.1944	0.0168	0.5042	-0.3904	0.192	0.4753	-0.3166	-0.8848	0.6525	-0.7957	0.0882	-0.3634	-0.1884	-0.0037	-1.0643	-0.185	-0.2844	-0.4205	-0.7645	0.0017	0.4257	-0.4866	0.0431	0.6516	0.7348	0.6501	-0.2762	-0.5201	1.0873
102207	-0.2073	-0.1807	-0.2475	0.0978	-0.042	0.274	0.3032	0.0372	0.4221	0.3092	0.184	0.4532	0.0652	-0.0286	-0.3225	-0.0642	-0.256	0.3409	0.3356	0.3113	-0.0682	-0.065	-0.0771	-0.1203	-0.1788	0.2005	0.1183	0.4356	-0.1054	-0.3193	-0.1527	-0.1366	-0.3173	0.0154	-0.0379	-0.0295	0.0899	0.2944	0.2132	-0.1234	-0.1382	0.3251	0.1096	0.3024	0.3024	0.155	0.033	0.0564	0.2814
102210	0.0269	-0.4084	-0.5562	0.0556	-0.4845	0.265	0.3402	-0.2724	-0.0211	0.1198	0.1865	0.0404	-0.8149	-0.0077	0.4423	0.2106	0.0683	-0.2882	0.6662	-0.207	-0.3059	0.073	-0.2257	-0.046	0.0066	0.3044	-0.1244	-1.0844	0.0371	0.1746	-0.8494	-0.1903	0.5437	-0.3768	0.148	-0.2715	0.4676	1.0286	0.128	-0.4961	-0.2744	0.2505	-0.0412	-0.5297	-0.7424	-0.0555	0.0832	0.0047	0.1824
102218	0.061	-0.1384	-0.0739	-0.1165	0.4411	0.2085	0.2345	-0.0074	-0.203	-0.1814	0.5687	0.2792	0.218	0.2732	-0.0822	0.0509	-0.3884	0.1731	0.3123	-0.0002	0.3183	0.3873	0.4849	0.2874	0.2933	0.4445	0.4703	0.0917	-0.1926	0.091	0.1009	0.1273	0.1239	0.247	-0.0555	-0.0145	-0.0808	0.589	-0.2929	0.1189	-0.087	0.0121	0.2367	0.6714	0.4987	0.5828	0.3563	0.2673	-0.1369
102233	-0.3162	-0.1884	-0.29	0.1277	0.0856	0.3559	0.3338	0.1589	-0.1271	-0.0533	0.3164	0.1658	0.0773	-0.1821	-0.1052	-0.0053	-0.0692	-0.1531	0.3942	0.0558	0.0071	0.289	0.0448	0.0611	-0.0146	0.4332	0.5931	0.3617	0.1072	0.1996	-0.0807	0.4331	0.0407	0.3611	0.0873	0.0512	-0.2634	0.8289	0.0148	0.2146	-0.2796	0.4963	-0.066	0.2615	-0.0432	0.6298	0.6453	0.0628	0.1958
102236	-0.2051	-0.2581	-0.3858	0.2244	0.0906	-0.0447	0.1834	-0.3961	-0.0621	-0.1104	0.0502	0.0494	-0.1228	0.075	0.3048	0.0428	0.0222	-0.2296	0.2532	0.0253	-0.189	0.0642	-0.2001	0.1547	0.1131	0.3223	0.1438	0.3888	1.0036	-0.0604	-0.3314	-0.0599	0.2389	-0.0533	-0.2184	0.1337	-0.0849	0.583	0.1409	0.1211	-0.2739	0.409	-0.02	-0.1146	-0.2036	0.4054	0.4034	-0.0071	0.1997
102244	1.062	0.2957	-0.53	0.0246	0.2259	0.0544	0.3401	0.9562	0.3261	0.9435	-0.3235	-0.588	-0.1148	-0.1992	0.5181	-0.0323	-0.4274	0.4646	0.2688	0.1927	0.2371	-0.5299	0.0695	-0.402	0.2401	0.1187	-0.7113	0.2858	-0.0606	-0.816	0.2482	-0.3955	-0.6476	-0.1215	-0.4269	-0.2689	0.3043	0.3739	0.3085	-0.0396	-0.2851	0.4985	0.3794	0.2535	-0.4439	0.0609	-0.1513	-0.2208	0.3534
102257	0.3664	-0.2863	-0.2363	0.0534	0.0946	0.0096	0.0645	0.3525	-0.0141	0.4738	-0.1481	-0.0873	-0.0565	-0.0775	0.3433	-0.035	-0.0623	-0.0522	0.0753	0.0044	0.0098	-0.0648	-0.3387	-0.0576	0.1153	0.0628	-0.3373	0.1278	0.6351	-0.4017	-0.1708	-0.3313	-0.1164	-0.4717	-0.3687	-0.3921	0.3223	0.3549	0.1597	-0.0449	-0.3427	-0.1831	0.2159	0.2984	-0.1461	0.2043	-0.042	-0.1074	-0.0709
102267	-0.0189	-0.0103	-0.7854	0.0295	-0.0805	0.3622	0.0073	0.8472	0.5076	0.9671	-0.2814	0.2079	0.0764	-0.1746	0.1345	-0.1805	0.3653	0.1492	0.4274	0.4672	-0.3688	-0.2745	-0.2127	-0.2827	0.0066	0.1894	-0.4177	0.5133	-0.1493	-0.7467	-0.2114	-0.4364	-0.0575	-0.3014	0.0542	-0.2443	0.4562	0.0983	0.6888	-0.3591	-0.1631	0.5947	0.0933	0.1522	-0.311	0.1371	-0.032	-0.0348	0.001
102274	-0.1315	-0.1521	0.8089	0.1754	-0.0448	-0.6185	-0.2701	-1.2808	0.0519	-1.0538	0.2053	-0.2928	-0.0431	0.2013	-0.3903	0.0793	-0.1296	-0.0121	-0.3403	-0.4811	0.3656	0.0923	0.02	0.2046	0.0519	-0.3324	-0.0079	-0.4872	-0.4056	0.7823	0.1432	0.3091	-0.372	0.058	0.1125	0.1511	-0.4879	-0.7425	-0.9423	0.228	0.4942	-0.7773	-0.192	-0.4266	0.3337	-0.5745	0.0025	-0.2757	-0.392
102302	-0.1647	0.7044	0.9331	0.1508	0.2249	-1.5485	-0.3857	-0.2735	-0.1071	-0.7188	0.0882	-0.1959	0.5851	0.2205	0.1683	0.2788	0.0494	0.7607	-0.1936	-0.2471	0.3777	-0.1736	0.1529	-0.334	0.1033	-1.4614	0.0379	-0.4135	-0.8091	0.5362	-0.5416	-0.135	0.2332	-0.0756	0.4857	-0.0951	0.0466	-2.1615	-0.5078	-0.0988	0.699	-1.0892	-0.1756	-0.7659	-0.0502	-1.4055	-0.3582	0.4601	-1.0207
102314	-0.5972	-0.4882	0.0317	0.2701	-0.0929	-0.6655	-0.1742	0.1205	-0.2989	-0.6055	0.5483	-0.0045	0.3032	0.0139	0.3025	0.1231	0.1908	0.2308	-0.1499	-0.0631	0.1052	-0.2	0.1386	0.4807	-0.023	-0.1481	-0.2898	-0.4968	0.063	0.5639	-0.1706	0.0824	0.0881	0.2	0.6968	-0.0331	-0.5214	-0.904	-0.2141	-0.0778	0.158	-0.1853	-0.0774	-0.4006	0.2532	-0.838	0.2155	-0.1249	-0.2559
102334	0.4693	-1.2896	-1.5701	0.6326	0.5203	-0.1538	-0.0836	0.3757	-0.4798	0.5078	-0.0259	0.3803	-0.053	0.2448	0.129	-0.2703	0.8498	0.1139	0.8399	0.4559	-0.2774	0.0433	0.1132	0.7228	0.3277	1.1722	0.5399	0.7308	0.4843	-0.7703	0.0874	-0.452	0.0089	0.2232	0.1332	0.3029	1.1998	1.0089	0.9522	-1.1251	-1.2208	0.4852	-0.9041	0.8586	-0.6549	0.0976	1.3481	0.0307	0.6331
102335	1.383	0.2943	-0.3926	-0.7087	0.1951	1.3636	0.3651	0.9995	0.5394	1.4222	-0.8068	-0.4942	-0.2791	-0.0879	0.7089	0.2099	0.227	0.4328	-0.2275	0.1628	0.6362	-0.3608	-0.2374	-0.2441	0.8717	0.0396	-0.215	0.4862	0.5531	-0.8491	0.8147	-0.4007	-0.2798	-0.8412	-0.584	-0.8117	-0.066	0.421	0.6581	-0.0702	0.0753	0.4314	-0.1554	0.445	0.2082	0.7129	-0.4664	-0.4894	-0.9251
102338	0.037	-0.8038	-0.579	0.4807	0.2466	-0.4314	0.4166	0.1474	-0.4365	0.5458	0.1325	-0.5332	-0.0562	0.1117	0.8981	0.2251	-0.0712	-0.1738	0.0333	0.0484	0.1245	-0.0601	0.0268	-0.0966	0.5404	0.2961	-0.0064	-0.501	-0.5473	-0.3089	-0.036	0.0299	-0.3055	-0.4609	-0.1691	-0.4696	0.4727	-0.1992	0.3423	-0.0011	-0.0834	0.4101	0.0613	0.0563	-0.1873	0.276	0.4549	-0.2755	-0.4936
102342	-0.0067	-0.2506	0.0196	-0.0039	-0.1953	0.0836	-0.0313	-0.3751	0.0938	-0.1263	-0.0521	-0.0751	-0.4575	-0.0685	-0.0282	-0.1172	-0.0787	-0.4759	0.0377	0.0492	-0.1068	0.07	0.1062	0.3415	-0.0024	0.2345	-0.1527	0.0345	0.5919	0.1296	0.2898	0.046	0.1497	0.0687	-0.2331	0.0864	-0.1757	0.2909	-0.1526	-0.2168	0.0894	0.1661	-0.0946	-0.0455	-0.1324	0.2891	-0.1381	-0.0842	0.3356
102344	-0.0629	-0.6645	-0.0095	-0.1565	0.1548	0.1803	0.214	-0.2038	-0.1199	-0.4383	0.4956	-0.0636	-0.1402	0.342	0.2746	0.2147	-0.029	0.2398	0.071	-0.0152	0.1213	0.3088	0.1804	0.3318	0.3844	0.0848	0.6092	-0.044	0.2002	0.5112	0.2763	0.5814	0.3335	0.1947	0.0723	0.0318	-0.383	0.693	-0.2248	0.1	-0.1679	-0.116	0.2843	0.2508	-0.2917	0.7504	0.1651	-0.0486	0.141
102355	-0.0058	-0.5659	-0.0883	0.145	-0.3134	0.3213	-0.0323	-0.0233	-0.1823	-0.0035	0.3012	0.1189	0.0525	0.238	-0.0559	-0.0532	0.1969	0.4336	0.1287	-0.2006	-0.0519	0.2067	-0.0188	0.1444	0.0951	0.1548	0.2751	0.2843	0.2239	-0.0648	0.3216	0.2105	-0.0012	0.0413	-0.14	0.131	0.0574	0.7288	0.051	0.0012	-0.3481	0.4835	0.1905	0.3252	0.1338	0.1486	0.0473	0.1112	0.1871
102384	0.1309	-1.0163	-1.1562	-0.0309	-0.0019	0.2398	0.1893	-0.314	0.2513	0.4908	0.1469	0.3451	-0.3323	-0.2193	-0.1673	-0.0481	-0.0661	-0.4679	-0.1128	0.4088	0.1705	-0.5079	0.453	0.4881	0.1938	0.9538	0.6329	0.4134	0.2965	-0.0018	-0.1561	-0.1172	0.2046	0.7324	0.0536	0.1601	0.6822	0.4107	0.7061	-0.9554	-0.6132	0.0385	-0.7935	0.4285	-0.2977	0.1401	1.2772	0.4017	0.3474
102388	-0.1205	0.2035	-0.0229	0.2892	0.0443	0.2927	0.3014	-0.3819	-0.2932	0.1322	-0.6912	0.3862	-0.0268	0.1584	0.407	0.288	0.1908	-0.4122	-0.1197	-0.1437	-0.5533	0.3795	0.1486	0.0039	0.1175	0.2442	0.1587	0.3469	0.5339	-0.4725	-0.2034	0.3081	0.3824	0.1525	-0.4248	0.0238	0.0937	0.7833	0.2957	0.3691	-0.2744	0.566	0.2961	-0.3049	-0.4873	0.7181	-0.076	0.0432	0.5275
102396	-0.0909	1.1683	0.6917	-0.3478	-0.3724	-0.2599	-0.5727	0.2766	0.3056	0.1424	-0.6435	0.4547	-0.3656	-0.2279	-0.1062	0.1101	0.0649	0.6734	0.1699	-0.3375	0.177	-0.0792	-0.3345	0.0538	-0.3505	-0.7577	-0.3154	-0.1272	-0.3084	-0.2389	-0.3059	-0.4848	-0.3045	-0.2124	-0.004	-0.3737	0.3376	-0.6456	0.5543	-0.4472	0.3922	-0.0651	-0.1938	-0.215	0.1591	-0.0992	-0.3028	0.2461	-0.714
102397	-0.7258	-0.6758	-0.7626	0.137	-0.2522	0.444	-0.1051	0.181	-0.0726	0.4467	0.1655	0.0236	-0.1882	-0.2348	-0.18	-0.5413	-0.1607	-0.0424	0.3661	-0.0115	-0.499	-0.3185	-0.418	-0.1022	-0.3634	0.2029	-0.1485	0.192	-0.6226	-0.3506	-0.4645	-0.1005	0.1815	-0.2377	0.3635	-0.479	0.6572	-0.0177	0.2121	-0.5046	-0.5525	0.2505	-0.0658	0.1445	-0.5226	-0.0683	0.0046	-0.4646	0.221
102415	0.0731	-0.4905	-0.4566	0.3259	0.3362	-0.29	0.2846	0.0846	-0.6105	0.2553	0.2916	-0.7062	0.0137	0.3452	0.7918	0.018	-0.372	0.411	0.0211	-0.0471	0.2069	-0.0834	0.119	-0.1617	0.558	0.2236	-0.0364	-0.7873	-1.173	-0.1337	0.1537	0.1712	-0.3937	-0.2892	-0.1768	-0.4882	-0.0949	-0.1552	-0.029	0.3711	-0.045	0.1747	0.2195	-0.0763	-0.1454	0.4161	0.4105	-0.216	-0.6111
102419	0.2494	-0.3002	0.0618	-0.2457	0.0992	0.136	0.0798	-0.4056	-0.5713	-0.1724	-0.1457	0.0218	0.141	0.3244	0.2083	0.1754	0.2904	-0.3195	0.3117	0.1586	0.2088	0.1804	0.5321	0.4738	0.4189	0.4249	0.3393	-0.3214	0.0784	0.16	0.1057	0.2176	0.1796	0.0055	-0.3421	0.1203	-0.0659	0.2925	-0.1454	0.1187	0.0101	0.0564	0.045	0.3684	0.2934	0.5883	0.3753	0.2652	0.1058
102437	0.0669	-0.5454	-0.3186	-0.5259	-0.0656	0.1201	-0.4382	1.0074	1.0373	0.8701	0.1035	0.0188	0.4399	-0.2234	-0.3648	-0.4479	-0.6193	0.576	-0.1833	0.3704	-0.2247	-0.3583	0.0746	-0.2182	-0.0579	0.1012	-0.787	-0.0909	-0.4978	-1.5308	0.6387	-0.8646	-0.2638	-0.5585	-0.0607	-0.2206	0.5466	-0.4871	-0.4419	-0.24	-0.1546	0.0641	0.9087	0.6056	0.2558	-0.3488	-0.2715	0.0744	-0.0681
102438	0.0535	0.2152	0.178	-0.138	-0.1304	-0.0955	-0.1935	-0.385	-0.0371	-0.2713	0.1224	0.2162	-0.0937	0.1181	0.1405	0.0152	-0.2154	-0.345	-0.3187	-0.1596	0.0415	0.1287	-0.0372	0.1872	0.2966	0.1321	0.0648	-0.0611	0.2928	0.2508	0.2438	-0.0548	0.1624	0.0627	-0.2795	0.3782	-0.2412	0.0167	-0.4471	-0.0839	0.1118	-0.1062	0.0537	0.1582	0.1627	0.0582	-0.1546	-0.0788	0.3376
102451	0.1386	1.6596	1.143	-0.5673	0.5404	-0.5444	-0.1282	0.4414	-0.6946	-0.5076	-0.4296	0.6457	-0.0067	0.0525	0.65	0.3156	0.1076	0.8441	0.7993	-0.8243	0.4242	-0.2147	-0.3871	0.2699	-0.1833	-1.1848	-0.4724	-0.3252	0.0367	0.6496	-0.6104	-0.253	-0.3877	0.0038	0.2759	0.5518	0.1305	-0.9082	0.6626	-0.8459	0.3447	-0.1252	-0.2035	-0.3259	0.127	-0.3664	-0.388	0.5716	-0.8856
102454	0.4317	-0.0543	-0.0251	0.02	-0.2478	-0.1324	0.3828	0.5226	0.1033	0.5395	-0.8308	0.2157	-0.3624	-0.0845	-0.3688	0.1431	-0.0521	-1.0492	0.131	0.8226	0.3497	-0.6115	0.1486	0.0994	-0.1912	0.0173	-0.3985	-0.781	0.1953	-0.7478	0.0515	-0.036	-0.1902	-0.3236	0.0735	-0.1098	-0.1502	0.2366	0.4797	0.1947	0.1188	0.816	-0.3998	-0.7537	-0.478	-0.0226	0.2004	-0.5376	0.4404
102465	-0.3869	-0.4378	-0.5774	-0.0056	-0.0459	0.3853	0.1115	0.2057	-0.0917	0.2981	0.2506	0.0743	-0.047	0.1803	-0.2593	-0.3892	-0.4831	0.3788	0.0797	0.0903	-0.3357	-0.2342	-0.1706	-0.1417	-0.1438	0.3939	-0.1886	0.2152	-0.747	-0.4832	0.5224	-0.0029	0.0679	-0.1496	0.1186	-0.0977	0.117	-0.0124	0.2235	-0.0127	-0.2015	0.417	0.0186	0.0814	0.0271	-0.128	0.343	0.0269	-0.2618
102483	0.4913	0.0745	-0.6378	0.0454	0.3343	0.6981	0.7061	1.0902	0.3253	0.7994	-0.0049	0.1654	0.334	-0.1071	0.2455	0.2091	0.1562	0.3377	0.7816	0.5482	0.1294	-0.0133	0.1732	-0.1363	0.3285	0.6773	0.0742	0.4094	0.3361	-0.5479	0.19	-0.2037	-0.0032	-0.1839	-0.1149	-0.4539	0.5675	0.478	0.5825	-0.0243	-0.4606	0.5116	0.2081	0.4858	-0.0762	0.4102	0.1984	0.1547	-0.0823
102484	-0.0801	-0.6002	-0.8528	0.4571	0.3036	0.1207	0.1279	0.8952	-0.1531	0.8292	0.0213	-0.1248	-0.0309	-0.2937	0.3849	-0.2766	-0.0871	-0.0574	0.6642	0.2293	-0.3056	-0.3756	-0.1416	-0.4024	-0.2179	0.3277	-0.3206	-0.1923	-0.9477	-0.3839	-0.412	-0.4442	-0.1853	-0.6827	0.1176	-0.7541	0.5948	-0.0973	0.3293	-0.2412	-0.5033	0.2945	0.0969	0.1795	-0.4729	0.0014	0.3169	-0.1045	-0.1303
102491	0.2122	-0.1707	-0.4083	-0.0377	0.1481	-0.0835	0.2181	0.1956	-0.5024	-0.1722	-0.1624	-0.1166	0.0366	0.0108	0.8367	0.3811	0.1341	-0.1744	0.1	-0.254	-0.028	0.1896	0.3093	-0.1399	0.4058	0.6612	0.207	0.4057	1.1884	0.262	-0.4085	-0.017	0.1641	0.1277	-0.9303	-0.1836	0.1116	0.9018	-0.5317	0.2156	-0.019	0.2533	0.0123	0.4011	-0.2824	0.8136	-0.1516	-0.1842	0.7828
102492	0.1149	0.3745	0.2249	-0.2767	-0.3583	0.2379	-0.2829	-0.4816	-0.2255	-0.4522	-0.2532	0.1224	-0.4175	0.0488	-0.3997	-0.2481	0.0746	-0.2359	-0.2977	-0.1212	-0.1442	-0.0825	-0.1582	0.2662	0.021	0.116	-0.0593	0.1781	-0.228	0.2603	0.3199	0.093	0.558	0.1492	-0.2385	0.1548	-0.1505	0.0361	-0.1355	-0.0054	0.3327	-0.0265	0.0561	0.1568	0.1408	0.1589	0.0563	-0.0022	0.041
102514	0.0344	-0.6367	-0.5885	0.3246	0.2908	0.1822	0.1332	0.8852	-0.1372	0.9283	0.0584	-0.2168	0.0198	-0.0091	0.919	-0.3268	-0.1751	0.3673	0.6199	-0.2478	-0.052	-0.1098	-0.2383	-0.3465	-0.0512	0.318	-0.2782	0.0967	-0.7676	-0.404	-0.3166	-0.4152	-0.5128	-0.461	-0.1048	-0.5041	0.6363	0.0933	0.1615	-0.2966	-0.5494	0.2868	0.3867	0.6186	-0.4019	0.191	0.2254	-0.2308	0.1653
102518	-0.4634	-0.7354	-0.8425	0.1329	-0.1232	0.1836	0.0148	0.4833	0.0806	0.4708	-0.0411	-0.0221	-0.1952	-0.1306	-0.0109	-0.3513	0.1581	-0.0971	0.4398	0.1693	-0.4994	-0.4479	-0.6572	-0.1336	-0.4498	0.1361	-0.4426	0.2067	0.0985	-0.3099	-0.4878	-0.3205	-0.0531	-0.5626	0.1676	-0.3241	0.2961	0.3322	0.4765	-0.5318	-0.2035	0.595	-0.0978	0.0553	-0.4385	-0.1943	0.0276	-0.1076	0.2339
102521	-0.0818	0.6759	0.9173	-0.0342	0.0331	-0.9834	-0.3782	-0.4139	-0.1159	-0.6345	-0.1752	-0.0481	0.0969	-0.2205	-0.3747	0.1916	0.1842	0.2219	-0.2319	0.0183	0.3171	-0.1517	-0.1043	-0.4252	0.0172	-1.0517	-0.0894	-0.4992	0.1905	0.6663	-0.5328	-0.1137	-0.1266	0.3803	0.2937	0.4713	-0.1959	-1.1659	-0.6464	0.1265	0.7304	-0.8308	-0.4044	-0.7431	0.1896	-0.8881	-0.6592	0.2251	-0.761
102525	0.0367	0.074	-0.5458	0.1083	0.1393	0.5231	0.1546	0.5373	0.3725	0.569	0.1391	0.1498	0.0843	-0.1609	-0.1673	-0.3921	-0.2366	0.168	0.2823	0.1878	-0.3153	-0.2114	-0.2384	-0.3143	-0.2261	0.1762	-0.2676	0.2343	0.0825	-0.671	-0.2326	-0.2549	-0.0709	-0.262	0.0416	-0.0137	0.5614	0.2637	0.5679	-0.07	-0.5119	0.2535	0.0951	0.423	-0.3546	0.1004	0.0891	0.0009	0.0164
102551	0.356	-0.1937	0.1879	-0.2037	-0.0395	0.5333	0.2602	-0.0331	-0.1016	0.0079	0.1892	0.1748	-0.0824	0.1286	0.2568	0.104	-0.0319	-0.0114	-0.0213	-0.2609	0.0403	0.3315	0.1952	-0.0197	0.242	0.0797	0.3227	0.0614	0.4436	0.0506	0.0738	0.1963	0.0662	0.1915	-0.2962	-0.046	-0.1329	0.6472	0.1588	0.0955	-0.2844	0.2317	0.0954	0.4091	0.1507	0.6833	0.0161	0.0339	0.4559
102558	0.8788	-0.9527	0.4794	-0.5753	-0.1753	-0.2759	-0.0357	-0.9833	0.4891	-0.5426	-0.4036	-0.2911	-0.0589	0.2687	0.2943	0.0558	-0.5656	-1.3753	-1.065	-0.4935	-0.1846	0.4519	0.1159	0.8288	-0.2217	0.8821	0.0437	-0.5803	0.9568	-0.1088	0.1927	0.2168	0.0448	-0.1736	-0.452	0.3178	-0.3941	0.4661	-0.9513	0.1728	0.2855	-0.4166	0.2503	-0.0264	0.4443	0.7694	-0.1779	-0.2024	0.9424
102559	0.3445	0.666	-0.1426	-0.0035	0.2048	-0.2936	-0.1694	0.2034	0.0645	-0.0087	-0.2956	0.3153	-0.2947	0.1028	0.5722	0.1538	0.1321	0.3077	0.1982	0.0804	0.0919	0.3077	0.0178	-0.0313	0.1983	0.098	-0.2408	0.2051	0.5977	-0.2434	0.0028	-0.3924	0.0006	0.1088	0	-0.1229	0.1968	0.3051	1.1562	-0.3301	-0.234	0.1997	0.1418	0.3601	0.2874	0.2873	0.1783	0.0217	0.3736
102563	0.1394	-0.2833	-0.664	-0.0283	-0.0888	0.019	0.1782	0.0982	0.387	0.3104	-0.2045	-0.2055	0.1299	0.0607	-0.2573	-0.1526	-0.0034	-0.3947	0.1259	0.3403	-0.2599	-0.17	-0.1339	0.1108	-0.2264	0.2989	0.0501	-0.1083	0.8781	-0.6439	-0.1048	-0.0939	-0.2479	-0.1254	0.0153	0.1359	-0.0712	0.5369	0.5901	-0.2155	-0.0751	0.9352	0.1019	-0.4735	-0.3813	-0.1244	0.0897	0.016	0.261
102564	-0.1024	0.7551	0.241	-0.4051	-0.3809	0.3365	-0.2243	-0.3819	-0.095	-0.4919	0.1971	0.1613	-0.1494	-0.2579	-0.1937	0.4917	-0.3462	0.3461	0.2072	0.1621	0.1834	0.026	-0.3438	-0.4071	0.1297	-0.0447	-0.0498	0.313	-0.0211	0.3138	-0.4625	-0.238	0.2154	0.2333	-0.0434	0.4897	0.0131	0.0947	0.5501	-0.209	-0.0208	-0.2229	-0.18	0.0006	0.6226	0.2864	0.1015	0.3869	0.2838
102565	0.1854	0.2283	-0.0879	0.2411	0.342	0.1627	0.5107	0.4525	-0.2943	-0.0847	0.3228	0.1874	0.212	0.2768	-0.4838	0.3211	-0.38	0.1409	0.0372	0.3092	0.1382	0.1886	0.3579	-0.1005	0.3656	0.0999	0.3206	-0.0949	-0.362	-0.1762	-0.4676	0.2699	-0.2692	-0.5224	-0.0959	-0.2555	0.0497	0.0057	0.4135	0.2353	0.2189	0.3514	0.0689	0.3904	0.0033	0.5426	0.2155	0.6826	-0.6745
102571	-0.4354	0.108	0.2779	-0.0328	-0.0243	0.7971	0.1188	-0.1167	-0.0088	0.2002	-0.0373	-0.3856	0.109	0.6263	-0.9001	0.0485	-0.1765	-0.3413	0.5304	-0.2432	-0.2339	0.1291	-0.0518	-0.0966	0.4448	-0.3391	0.3862	0.2824	-0.099	-0.0182	0.243	0.593	0.4636	0.5481	0.023	0.2881	-0.4916	-0.1012	0.3311	0.4344	0.0572	0.1952	-0.2154	0.6414	-0.2134	-0.3817	-0.0111	-0.0966	-0.1425
102596	0.3126	-0.5315	-0.0348	-0.1863	0.3209	0.0476	0.029	0.5769	-0.1184	0.0631	-0.3828	-0.6331	-0.0948	0.2854	0.7208	0.6592	-0.0535	0.1907	-0.0373	-0.2684	0.3783	0.1201	-0.1852	0.0618	0.2499	0.3257	-0.2082	-0.0404	0.74	-0.2192	0.3628	-0.3974	-0.2577	-0.44	-0.5138	0.0677	0.0547	0.5628	-0.1416	0.0317	-0.2785	0.233	0.145	0.1986	0.414	0.5842	-0.2143	-0.2904	-0.3014
102597	-0.2918	0.8656	0.8313	0.1688	0.1505	-0.7673	-0.4176	-0.1473	0.0546	-1.1577	0.2068	0.1889	0.1474	-0.3154	-0.3022	0.1632	-0.2087	0.6019	-0.1345	-0.0904	0.317	-0.2132	-0.3922	-0.219	-0.2991	-1.2648	-0.1056	-0.4748	-0.2734	0.7504	-0.4531	0.0657	-0.2352	0.4098	0.5737	0.3875	-0.3615	-1.3507	-0.9622	-0.0105	0.818	-0.9059	-0.2745	-0.5026	0.0785	-0.8374	-0.6723	0.307	-0.8651
102598	-0.1341	0.4984	0.339	0.0835	-0.003	-0.6553	-0.3461	-0.0529	-0.054	-0.3457	-0.0211	-0.0418	0.2413	-0.2466	-0.3356	0.1742	0.315	0.099	-0.0879	-0.1289	0.1819	-0.0091	-0.0923	0.0311	-0.1597	-1.0266	-0.107	-0.2358	-0.8264	0.208	-0.2169	-0.3114	0.0718	0.1544	0.4892	0.3491	0.0056	-1.293	-0.3129	-0.1233	0.6221	-0.7849	-0.4054	-0.5464	0.3813	-0.7469	-0.5906	0.1988	-0.6792
102604	0.1162	0.0181	0.1375	0.0708	-0.0336	0.263	0.0485	0.1491	0.3125	0.2845	-0.1249	0.0098	-0.2589	-0.157	0.211	-0.0638	0.1113	-0.3448	-0.0328	0.141	-0.2214	0.0957	-0.2114	0.0457	0.0799	0.2638	-0.1882	0.1719	0.5541	-0.3032	0.3039	-0.067	0.0839	-0.1564	-0.0062	0.2008	0.1919	0.7127	0.356	-0.1945	-0.1188	0.2161	-0.1644	0.1402	0.1605	0.1629	-0.0899	-0.1271	0.7301
102617	0.0308	-0.275	-0.486	0.2735	0.1832	0.2789	0.5041	0.5372	-0.4015	0.4017	0.2908	-0.0342	0.094	0.0256	0.0829	-0.3087	-0.0123	0.0085	0.4738	0.0114	0.0306	-0.0326	0.0293	-0.0868	0.0032	0.4705	0.1131	0.1313	-0.237	-0.0921	-0.2154	0.0381	-0.0635	-0.2078	-0.0035	-0.321	0.2796	0.2498	0.1531	-0.065	-0.3476	0.2579	0.0401	0.3415	-0.2618	0.197	0.4924	-0.0735	-0.0451
102622	-0.1526	0.0951	0.5643	0.2252	0.4299	-0.755	-0.4924	-0.546	-0.2716	-0.683	0.2046	-0.4932	0.242	0.1238	-0.153	0.216	0.2546	0.4607	-0.3958	-0.0046	0.1494	-0.1415	-0.1259	-0.139	0.071	-1.5835	0.0108	-0.3713	-0.5729	0.826	-0.0445	0.6144	0.2551	0.2866	0.4302	0.0634	-1.0517	-0.6879	-0.7232	-0.0007	0.6217	-0.5134	-0.1308	-0.9112	0.3919	-0.3074	-0.3251	0.0413	-1.2426
102632	-0.0972	-0.1551	-0.2933	-0.0151	0.086	0.4142	0.2711	0.4834	-0.1166	0.3124	0.0303	0.084	0.09	0.0388	-0.1505	-0.1389	0.3989	-0.4455	0.3562	-0.3381	0.026	0.0986	0.0703	0.2008	-0.083	0.4145	0.1814	0.3762	0.6452	-0.0151	0.2051	0.1681	-0.1002	-0.1456	-0.2107	0.0328	-0.1094	0.4974	0.1849	0.1357	-0.3574	0.5228	-0.0907	0.0131	-0.1109	-0.0597	0.3596	0.0811	0.4381
102654	-0.2584	0.4701	0.3182	0.4143	-0.4416	0.2835	-0.4658	-0.3791	0.8425	-0.6176	0.0744	0.5666	-0.4891	-0.431	-0.3718	-0.2399	0.3735	0.0227	-0.031	0.2507	0.2242	-0.263	-0.0725	-0.3024	-0.4302	-0.0392	-0.046	0.22	0.0658	0.0002	-0.4283	-0.5663	-0.2994	0.5215	-0.2464	0.2068	0.1368	-0.351	-0.325	-0.5692	0.3423	-0.4262	0.1247	-0.2704	-0.3389	-0.5608	-0.1624	0.196	0.3178
102664	-0.2788	0.0759	-0.7685	0.0833	-0.2263	0.2677	-0.1156	0.1893	-0.3119	0.274	0.3047	0.2817	0.6473	0.1857	0.0375	-0.3417	-0.1386	-0.4706	0.2472	0.0175	-0.3003	0.055	0.026	-0.0968	-0.1974	0.2306	0.3182	0.3551	0.0853	0.2263	0.2543	0.0368	0.1026	0.1152	0.0326	-0.124	0.1168	0.2142	0.4898	0.0565	-0.789	-0.276	-0.0802	0.418	-0.4446	0.362	0.2336	0.181	0.9711
102688	0.4427	-0.5829	0.2853	-0.2999	-0.0343	-0.0323	0.0385	-0.4644	-0.0935	-0.1017	-0.1425	-0.0545	-0.2234	0.4309	0.3606	-0.0179	-0.1208	-0.389	-0.383	-0.32	0.1641	0.3211	0.2072	0.3981	0.2578	0.4139	0.0354	0.2311	0.1469	0.0025	0.3521	-0.1009	-0.1748	-0.0354	-0.6276	0.4339	-0.3673	-0.0077	-0.3385	0.0719	0.1983	0.0961	0.3432	0.1264	0.3653	0.4631	0.2063	-0.027	0.3684
102706	0.2409	-0.3348	0.0464	-0.4629	-0.3027	0.3514	-0.2077	-0.7298	0.6113	0.0645	-0.5004	-0.1762	-0.4719	0.0769	0.1259	-0.0074	-0.5655	-0.4753	-0.7313	-0.4579	-0.1533	-0.5813	-0.5247	0.1607	0.2627	-0.168	-0.5704	0.3521	-0.3648	-0.0671	0.1609	-0.3528	0.1608	-0.4517	-0.238	0.2206	-0.2172	-0.6702	-0.3631	-0.0878	0.0479	-0.1623	-0.4831	-0.2004	0.4063	-0.2649	-0.5354	-0.6195	0.2589
102718	0.0879	0.0478	0.0081	-0.2214	-0.325	0.2979	0.0382	0.1603	-0.173	-0.1275	-0.0164	0.2035	0.3873	0.1036	-0.0079	-0.3121	-0.1032	-0.2723	0.0592	-0.0914	-0.3412	0.2617	-0.0433	-0.0934	-0.1429	0.0639	0.1092	0.4855	0.5596	-0.0603	0.2724	0.0788	-0.1005	0.4672	-0.0476	0.239	-0.2623	0.733	0.1393	0.2766	-0.3176	0.1836	0.1904	0.3139	0.0181	0.4274	0.163	-0.0952	0.4438
102721	-0.1606	1.1188	1.0218	0.2127	-0.1928	-0.1005	0.7273	-0.6403	0.0249	-0.8783	-0.625	0.0805	-0.0929	0.4468	0.2608	0.0273	-0.148	-0.6337	-0.5387	0.5482	-0.063	0.203	0.1949	0.1831	0.213	-0.1193	0.4229	0.4815	-0.1508	0.1683	0.4439	0.3559	-0.3914	0.1585	-0.1981	-0.3656	-0.2727	0.4792	0.1078	0.8796	-0.041	-0.5854	0.283	-0.5472	-0.2528	-0.165	0.3702	-0.5295	-0.3725
102723	0.2641	0.2791	-0.469	0.0806	-0.0659	0.242	0.1942	0.4677	0.2908	0.6264	-0.0529	0.1212	0.3439	-0.0731	0.4045	-0.2264	0.2985	-0.0866	0.5231	0.1592	-0.2298	0.064	-0.155	0.0157	-0.0262	0.2293	0.1205	0.3384	0.6685	-0.4079	0.1672	-0.3441	0.3128	-0.4043	0.2278	-0.0618	0.494	0.5074	0.6626	-0.0006	-0.4299	0.4935	0.0112	0.2693	-0.2408	0.1827	0.2335	0.1477	0.1569
102732	1.0372	-0.3812	0.4264	-0.3062	-0.1818	0.2981	0.1223	-0.0881	-0.0331	-0.0932	-0.1392	-0.0829	-0.285	-0.0191	-0.3673	-0.0698	-0.15	-0.0939	-0.3116	-0.1648	-0.3256	0.1142	0.2184	0.1642	-0.3167	0.2733	-0.1891	0.1119	0.4794	-0.1052	0.402	0.0287	-0.3708	-0.0496	-0.4783	0.1546	-0.468	0.1388	-0.2663	-0.0176	0.0031	0.1584	-0.1854	0.2863	0.1098	0.1385	-0.0406	-0.0204	0.3286
102734	-0.0904	0.7711	0.5855	0.1128	0.096	-0.8776	-0.2424	-0.1658	-0.1494	-0.3617	-0.0249	0.1465	0.1426	-0.6397	-0.2836	0.0988	0.1718	0.1717	-0.16	-0.2172	0.3344	0.0269	-0.0133	-0.1798	0.1633	-0.7249	0.4062	-0.159	-0.2107	0.5258	-0.2783	-0.0099	0.1434	0.6081	0.1153	0.1639	-0.002	-0.7712	-0.7057	-0.1501	0.5492	-0.7766	-0.1545	-0.2776	-0.0152	-1.3163	-0.1602	0.4994	-0.5221
102788	-0.2508	-0.0809	-0.4599	0.2501	-0.1384	0.3787	0.2303	-0.1574	-0.0479	0.2086	0.1475	0.1792	-0.0134	-0.1442	-0.0207	-0.175	0.1886	-0.3439	0.2372	-0.2677	-0.3644	0.0875	-0.2625	-0.1729	-0.2677	-0.0022	0.1909	0.4187	0.5796	0.1686	-0.1274	0.2029	0.2947	-0.0124	0.043	-0.1145	-0.126	0.5202	0.7391	0.0687	-0.4579	0.5001	-0.3821	0.3411	-0.375	0.0956	-0.0413	0.0309	0.3745
102828	-0.1505	0.0403	-0.1321	-0.1338	-0.2938	0.1657	0.0279	-0.2307	-0.0021	-0.0764	0.2819	0.1789	0.0971	0.0691	0.0987	-0.1784	0.2521	-0.397	-0.053	-0.0251	0.0185	0.2827	-0.0242	0.2086	-0.1966	0.1082	0.1259	0.547	0.8364	0.2687	0.2161	0.2468	0.2208	0.2556	-0.1295	0.2612	-0.0888	0.9537	0.0845	-0.014	0.0056	0.3808	-0.1139	0.4546	0.0876	0.0623	0.1281	0.0054	0.5719
102836	-0.0708	0.6694	1.0583	0.0762	0.0924	-1.1212	-0.3915	-0.0493	-0.2787	-0.9772	0.0214	-0.1735	0.2581	-0.0855	-0.0811	0.2862	0.185	0.2848	-0.2678	-0.253	0.4807	-0.0321	-0.1364	-0.2902	-0.0832	-1.5668	-0.0027	-0.4619	-0.4307	0.8497	-0.2944	0.0769	-0.1614	0.2441	0.5923	0.5606	-0.3713	-1.6547	-0.7788	0.2127	0.8249	-0.867	-0.2797	-0.6471	0.1401	-1.2999	-0.4505	0.3682	-1.0754
102841	0.5714	-0.1271	-0.6371	0.0946	0.1854	0.652	0.6298	1.2972	0.393	1.267	-0.2278	-0.1284	0.0245	-0.207	0.5474	0.2777	0.6858	0.476	1.0144	0.4995	0.4686	-0.1536	0.327	-0.1544	0.4978	0.4116	-0.022	0.311	0.1723	-0.8605	-0.0453	-0.4261	-0.4109	-0.4377	-0.18	-0.8028	0.6256	0.3884	0.5435	-0.1015	-0.489	0.7752	0.2347	0.3886	-0.1072	0.4831	-0.0201	-0.1745	-0.1239
102845	-0.4177	-0.0418	-0.5207	-0.0045	0.606	0.4753	0.0767	0.4023	0.0772	0.5793	0.1096	-0.0467	-0.1394	-0.0293	-0.0424	-0.0116	-0.0055	0.4169	0.4505	0.3676	-0.1194	-0.1427	0.0138	-0.1435	-0.1495	0.4199	0.0001	0.1289	0.2523	-0.4415	0.2314	0.1323	-0.1182	0.1245	-0.0419	-0.0616	0.2146	0.2944	0.3019	0.0235	-0.0708	0.2168	0.2059	0.377	-0.0271	0.3998	0.1613	-0.0086	0.1786
102848	-0.3205	-0.2771	0.4416	0.0413	-0.4756	0.6457	-0.0489	-0.4924	-0.273	-0.4446	0.1103	0.5016	0.0005	0.0623	0.6883	-0.8276	0.4779	-0.6814	0.432	0.4835	-0.4403	0.5326	-0.235	0.1158	-0.0599	0.4301	0.5172	0.2876	0.5461	0.041	-0.0113	-0.0945	0.897	-0.422	0.5035	0.3717	-0.354	0.7112	0.4522	-0.2895	0.2446	0.0709	-0.1725	0.0596	-0.4123	-0.1328	0.6575	-0.7131	0.6339
102875	0.0651	0.5143	-0.2662	-0.0175	-0.1915	0.4864	-0.0842	-0.0241	0.4651	0.4552	-0.2422	0.0853	0.0434	0.0038	0.2544	-0.0653	0.1169	-0.0464	-0.1984	-0.319	-0.0558	0.014	0.0563	0.0989	0.1403	0.3078	-0.1452	0.3725	0.5672	-0.1865	0.5494	-0.1035	0.2502	-0.0483	-0.1318	0.4917	0.1321	0.1246	0.0093	-0.1145	-0.2301	0.1664	-0.0681	0.2003	0.1988	-0.352	-0.3669	-0.087	1.0007
102907	0.3661	-0.271	-0.0619	-0.1513	0.0936	0.3069	0.083	0.204	0.0898	0.3049	-0.1024	-0.1514	-0.1881	0.1524	0.1875	-0.1572	-0.0273	0.496	0.3011	0.1392	0.1253	-0.0123	-0.0875	-0.0249	0.4217	0.2112	-0.0132	0.094	0.6157	-0.3388	-0.0558	-0.0703	-0.3883	-0.0888	-0.1847	-0.3663	0.0206	0.5742	0.3361	-0.0266	-0.2492	0.3614	0.0968	0.4997	0.0344	0.4025	0.0282	0.2359	0.2104
102910	-0.0217	-0.0454	0.1025	-0.2703	0.0242	0.4189	0.0797	-0.0987	0.0007	-0.1304	-0.1534	-0.0734	-0.1316	0.0473	-0.2008	0.0516	0.0289	-0.3205	-0.1552	0.0676	0.0087	0.1983	0.2577	0.2074	-0.1399	0.1614	0.1057	0.0541	0.7831	-0.0342	0.5215	-0.0718	0.079	0.3229	-0.2216	0.2889	-0.0631	0.4066	0.0117	-0.095	-0.1204	0.1886	-0.1625	0.0052	-0.1404	0.1129	-0.0745	-0.2917	0.5914
102915	-0.7959	-1.3267	-0.8742	0.6157	0.2494	0.2262	-0.4859	-0.4318	0.0876	0.3521	-0.3252	0.1077	-0.0364	-0.1787	-1.5104	-0.9335	0.7239	-0.7694	-0.1133	0.3979	-0.8431	-0.1842	0.0992	0.8225	-0.7581	0.9016	0.7353	0.8511	-0.2322	-0.6023	0.2889	0.0071	0.2133	0.6852	0.5191	-0.292	0.4207	0.5463	0.6453	-1.1536	-1.1985	0.9051	-0.8059	0.685	-1.1954	-0.3525	1.155	-0.2744	0.9562
102924	0.5707	0.7558	-0.0316	-0.2622	0.6923	0.737	-0.0605	-0.0661	-0.3028	0.4087	-0.2499	0.2345	-1.2012	-0.0395	0.4215	0.4617	-1.1408	0.1234	0.1714	0.1308	0.1425	-0.6085	-0.3813	0.0907	0.0005	-0.5085	0.2486	-0.5039	0.0401	0.7176	-0.2149	0.4914	0.6406	-0.7417	-0.6914	0.819	-0.0257	0.0898	0.2649	0.4951	-0.0858	-0.3096	-0.8438	-0.0413	0.8911	-0.0677	0.2027	0.0906	0.267
102937	0.4781	-0.4749	-0.1756	-0.1458	0.1196	0.4089	0.423	0.1727	-0.0998	0.2335	-0.0984	-0.2438	-0.3687	0.0456	0.1265	0.5026	-0.2041	0.0258	0.2748	0.2511	0.1155	0.1605	0.2991	0.1095	0.7038	0.6651	0.1004	-0.2808	0.0965	-0.3981	0.0893	-0.1479	-0.3223	-0.3653	-0.3056	-0.3468	0.1745	0.6507	-0.2669	-0.1777	-0.0427	0.4352	0.4354	-0.0578	0.1948	0.3959	0.2397	-0.2281	-0.3679
102967	0.742	-0.7783	-0.2329	-0.0509	0.0177	-0.55	0.2392	-0.0682	-0.1638	0.2791	-0.2961	-0.1849	-0.3202	0.3241	-0.1149	0.3608	-0.2409	-0.4731	-0.0123	0.9252	-0.1581	-0.0013	0.4968	0.3184	0.3143	0.6308	0.1043	-0.6775	0.1917	-0.7832	-0.2259	-0.0512	-0.262	0.1092	-0.1432	-0.0873	0.1557	0.3781	0.4242	0.4472	0.0477	0.4716	0.2916	-0.3291	0.132	0.3447	0.3105	-0.3242	0.0759
103010	0.5835	0.1376	0.0043	-0.1083	0.6191	0.1108	0.4608	0.3981	0.2673	0.0049	-0.2194	0.2896	-0.2726	0.1863	0.5743	0.2253	-0.131	0.3299	0.6115	-0.4015	0.0734	-0.0881	0.1507	-0.4017	0.0963	0.4274	-0.0119	0.2949	0.9098	-0.0462	-0.411	-0.3366	0.2348	-0.7306	-0.8298	-0.447	0.1747	0.377	-0.2438	0.2298	-0.0012	0.337	0.3063	0.3934	-0.4229	0.4811	-0.1714	0.157	-0.054
103021	-0.2153	-0.3105	-0.1422	0.058	-0.0303	-0.0764	-0.0417	-0.6425	-0.4297	-0.201	0.0405	0.2147	-0.0637	0.2863	0.1907	0.3244	0.0273	-0.2424	0.3498	-0.0226	-0.0583	0.2547	0.301	0.1824	0.0414	0.3769	0.0726	0.1152	0.1761	0.0116	0.1228	0.2269	0.3528	0.289	0.1047	0.2386	-0.0412	0.5055	0.3361	0.0815	-0.0975	0.2511	0.0244	0.0672	-0.2599	0.3316	0.3232	0.0553	0.4349
103034	0.0812	-0.3191	-0.2569	0.1112	0.2362	-0.03	0.2617	0.2253	-0.2596	0.5142	0.0874	-0.1449	0.2139	0.2271	0.5445	-0.0434	0.1181	0.3365	0.4066	0.0601	0.1541	0.1102	0.5414	-0.0002	0.5085	0.5094	0.2747	-0.0106	-0.5243	-0.2252	0.0073	-0.0606	-0.0054	-0.3578	0.2221	-0.8059	0.3849	-0.3334	0.3328	0.0693	-0.1501	0.2267	0.1562	0.4707	-0.2346	0.4153	0.4083	0.1762	-0.4484
103085	-0.1318	-0.2609	-1.2955	-0.0309	0.4224	0.1323	-0.0957	2.758	0.869	2.0294	-0.2038	-0.2098	0.1677	-0.2069	0.605	-0.6132	-0.0733	1.0551	1.2746	1.2495	-0.0989	-0.8475	0.2692	-0.2884	-0.436	0.4141	-0.952	0.486	-0.4843	-1.1297	-0.2083	-0.9238	-0.6444	-0.6853	0.0704	-0.376	0.8399	0.415	0.3817	-0.3093	-0.3053	0.7197	0.8216	0.8013	-0.8894	-0.3117	0.1404	-0.1171	-0.1404
103095	-0.3237	-0.4912	-0.5113	0.3256	-0.0211	0.0995	0.0897	0.4184	-0.3271	0.5314	0.2544	-0.0691	-0.0425	-0.2651	0.0709	-0.2706	-0.034	-0.0426	0.4642	-0.076	-0.2915	-0.1983	-0.1249	0.0488	-0.256	0.1845	-0.1798	0.1715	-0.4136	-0.0991	-0.3917	-0.1088	0.0164	-0.3768	0.2681	-0.6446	0.3856	-0.7217	-0.1469	-0.227	-0.2055	0.1931	-0.127	-0.0576	-0.5612	-0.3361	0.2656	-0.3135	-0.349
103097	-0.4022	-0.5139	-1.1161	-0.112	-0.0004	-0.0169	-0.353	1.6833	0.6401	1.4904	-0.2295	0.1171	0.1009	-0.2289	0.3111	-0.3262	0.1879	0.5347	0.8364	0.7966	-0.423	-0.7844	-0.2622	0.0267	-0.5558	0.5445	-1.2005	0.2988	-0.0325	-1.5321	-0.2823	-1.0419	-0.306	-0.7557	0.4069	-0.7326	0.9749	-0.3242	0.4133	-0.6233	-0.2939	0.6745	0.4048	0.2415	-0.9447	-0.745	0.2787	-0.3053	-0.3541
103100	0.3877	-0.1901	0.3681	-0.4218	-0.131	0.3219	0.3222	0.2573	0.0871	0.0344	-0.2602	0.0383	0.2733	0.3567	0.2785	0.1433	0.3401	0.1573	-0.158	0.0182	0.4603	0.6196	0.7588	0.2499	0.4582	0.1334	0.3429	-0.1719	-0.0778	0.482	0.635	0.2179	0.1865	0.0651	-0.3796	0.0141	-0.2351	0.2734	-0.837	0.0374	-0.4394	-0.1974	0.1198	0.5351	0.4312	-0.1124	0.4304	0.2457	0.1322
103113	-0.3478	-0.2354	-0.1417	0.3415	-0.093	0.8541	-0.0572	-0.0129	0.2076	0.1354	-0.2835	0.2522	-0.5677	-0.2848	0.157	-0.0236	0.1533	-0.2989	0.5361	-0.3054	-0.2012	-0.1968	-0.3919	0.077	-0.0065	0.1869	-0.1573	0.1922	0.1135	-0.0449	-0.2439	0.0343	0.4239	0.1774	-0.089	0.1343	0.1221	0.5094	0.0067	-0.5723	-0.3242	0.5765	0.2334	-0.1141	-0.0136	-0.0289	-0.1398	-0.3516	0.709
103150	0.1907	-0.4947	0.2235	-0.6103	-0.2866	-0.2611	0.092	-0.1966	0.1161	-0.1292	-0.2501	-0.2618	-0.3184	0.3592	0.1477	0.2128	0.064	-0.4563	-0.3308	0.0902	0.1254	0.0517	0.2491	0.2567	0.0935	0.2966	-0.0514	-0.1149	0.6121	-0.1554	0.1058	-0.0662	0.0246	-0.0088	-0.6236	0.105	0.0505	0.1515	-0.2663	0.1105	0.2011	-0.1173	0.1416	0.2968	0.4075	0.3371	-0.0556	-0.2431	0.3343
103153	-0.1515	-0.4988	-0.5656	-0.0518	-0.102	-0.1812	-0.2995	-0.557	-0.2651	-0.2277	-0.079	-0.0434	-0.0742	0.9722	-0.0584	0.0272	0.0222	-0.3155	-0.2442	-0.4138	-0.1661	-0.1076	0.2718	0.0039	0.5335	0.1543	0.0349	-0.4822	-2.2676	-0.4432	-0.1355	-0.2895	-0.1024	0.0642	-0.1336	0.2246	-1.148	-0.0789	0.2923	0.2723	0.3561	-0.4143	0.185	0.6369	-0.4494	-0.1057	-0.191	-0.1636	-0.2576
103169	1.2914	0.155	-0.8827	-0.5243	0.4605	0.7875	0.1143	0.0051	0.0569	0.3322	0.6038	-0.4792	0.5335	-0.4815	-0.2278	0.923	0.6136	-1.1502	0.1829	0.1224	-0.0051	1.2368	1.8196	0.4807	-1.5142	0.4193	-0.3917	0.0043	0.8409	0.1478	1.0432	0.0807	-0.8167	0.0827	-0.0109	1.0268	-0.1308	-0.796	-1.6411	-0.7043	-0.0567	-0.2542	-0.9644	-0.081	0.5029	0.4171	-0.1191	0.712	0.6186
103183	-0.2302	0.4929	0.5459	0.2188	0.1421	-0.8477	-0.228	-0.2579	-0.2633	-0.4525	0.1213	-0.1976	0.3397	-0.2642	-0.2053	0.3172	0.0992	0.216	-0.1295	-0.2281	0.2282	0.01	0.091	-0.0374	0.0033	-1.262	-0.1054	-0.541	-1.1737	0.5681	-0.2432	-0.0176	-0.0431	0.3179	0.4483	0.2598	-0.2571	-1.9361	-0.719	0.1776	0.7124	-1.1008	-0.3395	-0.4802	0.2287	-1.0065	-0.4973	0.2294	-1.0096
103185	-0.028	-0.3535	-0.1114	0.2737	-0.5632	-0.1234	0.0972	0.0803	-0.1844	-0.2445	0.083	0.227	-0.1699	0.0959	-0.0334	0.076	0.4539	-0.6625	-0.0615	0.4252	-0.1432	0.1489	0.1466	0.3493	-0.0575	0.1916	0.2445	0.2789	0.8746	0.1899	0.1555	0.3201	0.4789	0.3457	0.0324	0.3307	-0.1838	0.6483	0.3024	-0.1043	-0.0062	0.4485	-0.0654	0.1664	-0.1455	0.0005	0.5068	-0.1117	0.4858
103201	0.4485	-0.416	-0.4097	0.0167	0.5511	-0.0461	0.37	0.2119	-0.2907	0.5676	-0.0512	-0.2996	0.334	0.3803	0.2917	-0.0027	-0.7472	0.1355	-0.4713	-0.1068	0.0648	-0.1641	0.6012	0.068	0.5195	0.5869	-0.1706	-0.2611	-0.8741	-0.5244	0.508	-0.2913	-0.2798	-0.324	-0.0214	-0.5464	0.1452	-1.3247	-0.3046	0.0519	0.0113	-0.147	0.4465	0.187	0.2163	0.0966	0.3432	0.0314	-0.4001
103206	0.2913	-0.5996	-0.2768	-0.2613	-0.2821	2.7935	-0.4417	-0.7605	-0.1197	-0.4989	-0.6728	-0.6048	-0.7862	0.0278	-0.225	-0.2525	-0.5475	-0.2373	-0.4766	0.3435	-0.3307	-0.4796	0.0061	-0.1063	0.142	-0.206	-0.4637	-0.5369	-0.6379	-0.4055	0.0817	-0.1979	-0.2229	2.5239	3.1272	0.0871	-0.3926	-0.3898	0.0894	2.0939	-0.1327	-0.4152	0.0736	-0.7096	-0.357	0.1331	-0.2986	-0.6428	0.1017
103225	0.0494	-0.2206	0.2064	-0.2775	-0.0628	0.8281	0.0449	0.7444	0.5021	0.5743	0.3024	0.3185	0.5642	0.0824	-0.3515	-0.0357	0.3149	0.1334	0.2752	0.253	-0.1797	0.2792	0.5434	0.3314	-0.008	0.2802	0.1669	0.4917	0.5866	-0.0541	0.6956	-0.0211	-0.0332	0.12	-0.2016	0.3797	-0.037	0.688	0.2858	0.3162	-0.252	0.3981	0.1685	0.385	0.1725	0.1523	0.0009	0.1042	0.328
103291	-0.2992	1.0961	0.8071	0.1725	-0.0199	-0.9131	-0.3766	-0.3132	-0.0482	-0.4796	-0.0444	-0.0254	0.2173	-0.3789	-0.3017	0.2629	0.1771	0.1347	-0.242	-0.0808	0.2384	-0.0876	-0.1787	-0.3192	-0.1596	-1.3784	-0.0302	-0.451	0.1454	0.7779	-0.4975	0.0866	0.1118	0.4128	0.4477	0.2513	-0.0842	-1.1317	-0.8081	0.0926	0.8201	-0.9657	-0.5308	-0.5682	0.0836	-1.1378	-0.4706	0.332	-0.7093
103306	-0.1366	0.4565	0.6936	0.0204	0.0215	-0.365	-0.3488	-0.5691	-0.2488	-1.0787	-0.0209	0.3018	-0.06	0.1033	-0.256	0.4379	-0.715	-0.3713	-0.1835	0.272	0.1141	-0.3896	0.1007	-0.064	-0.0686	-0.18	0.0695	-0.2721	0.4126	0.1705	-0.0169	0.0237	-0.0961	0.3505	0.2613	0.0129	0.0797	-0.4364	-0.7198	-0.0004	0.4153	-0.8228	-0.2098	-0.2601	-0.0723	-1.1577	0.0325	0.2449	-0.0503
103341	-0.3813	-0.0849	-0.2442	0.3564	-0.1104	0.4932	0.1531	0.183	0.2334	0.1804	-0.0062	0.3383	-0.2626	-0.3382	0.2694	-0.3952	0.3085	-0.0787	0.3848	-0.8324	-0.3642	0.0332	-0.2507	-0.2791	-0.477	-0.0157	-0.1245	0.4343	0.713	0.1176	-0.5738	-0.046	0.2852	0.074	0.1488	0.426	0.2326	0.5362	0.5704	-0.1511	-0.24	0.6135	-0.4287	0.2758	-0.7757	0.2553	-0.0146	-0.1094	0.6108
103342	-0.3767	1.1467	0.9774	0.0374	-0.4476	-0.4929	-0.3312	0.5852	0.5787	-0.8804	0.4509	0.1958	-0.1458	-0.4867	-0.4869	0.1338	0.0864	0.4157	-0.0709	-0.3097	0.2525	0.1677	-0.4152	-0.5122	-0.1894	-1.4574	0.1998	0.2079	-0.794	0.6597	-0.649	-0.1934	-0.3619	0.6047	0.1214	0.2899	-0.0839	-0.635	-1.0745	0.0007	0.7208	-0.7467	-0.1965	-0.9161	-0.0547	-1.257	-0.9053	0.3887	-0.3758
103350	-0.3839	-0.3441	-0.397	0.0555	0.1074	0.0113	0.0843	-0.3936	0.1661	0.1717	0.0534	0.231	-0.0368	-0.3402	-0.1235	-0.1678	0.0221	-0.5494	0.0226	0.1903	-0.3436	0.2143	-0.3799	0.0715	-0.2843	-0.1047	-0.0038	0.1086	0.6772	-0.3719	-0.3232	-0.2098	0.4986	-0.2597	0.2489	0.1431	0.0527	0.1578	0.1435	0.1888	-0.3139	0.1788	-0.1079	-0.1414	-0.1273	-0.0749	-0.2143	-0.2097	0.3576
103357	0.8355	-0.8469	0.1774	-0.1263	0.1413	0.468	0.4284	0.2488	0.1253	0.7054	-0.3033	-0.0377	-0.1367	0.1889	0.0983	0.0438	0.1297	-0.0212	0.3215	0.4959	0.3305	0.1499	0.2652	0.1597	0.0584	-0.0077	-0.001	0.0569	0.7621	-0.3453	0.3826	0.0754	-0.2946	-0.2337	-0.3992	-0.4279	-0.0435	0.8591	-0.2709	-0.0463	-0.2926	0.4058	0.1035	0.2694	0.4284	0.8069	-0.3001	0.1524	0.2957
103366	-0.3059	-0.3603	-0.4437	0.362	0.2058	0.6149	-0.0391	0.3236	-0.0295	0.2023	0.3679	0.0409	0.0939	-0.1429	0.0141	-0.2796	0.1874	-0.2224	0.0074	-0.0647	-0.177	-0.6071	-0.4365	-0.5038	-0.0444	0.2719	0.1649	0.2668	0.4355	-0.1374	-0.1626	-0.2759	0.4024	-0.1658	0.6093	-0.2465	0.707	0.5638	0.4584	-0.0413	-0.4373	-0.2666	0.1438	0.5212	-1.3905	-0.0423	0.3868	-0.6026	0.3438
103382	0.2307	-0.2438	-0.1229	-0.8754	-0.6815	0.3379	0.4749	0.3306	0.1571	0.2858	-0.0135	0.4847	-0.3079	0.21	-0.03	0.4242	-0.5264	-0.1575	-0.9248	0.4701	-0.3088	0.3022	0.1666	0.0962	-0.506	0.1878	-0.083	0.2785	0.2979	-0.0595	0.3146	0.3366	0.1005	0.7693	0.1116	-0.0557	-0.4327	0.4636	0.2968	-0.092	-0.3204	0.0741	-0.5149	0.0645	-0.2779	-0.3385	0.4142	0.4102	0.5572
103384	0.321	-0.1967	0.162	-0.1063	-0.0271	0.0125	-0.0017	-0.7681	-0.099	-0.8801	0.021	-0.0146	-0.172	0.35	0.3981	0.3779	0.0786	-0.2299	-0.3652	-0.0213	0.0371	0.4376	0.4999	0.3698	0.226	0.2447	-0.0676	-0.3825	-0.1846	0.1142	-0.0157	0.3664	0.1485	-0.0904	-0.105	-0.1427	0.0495	0.3749	-0.0654	-0.0237	0.2262	0.1513	0.2898	-0.085	0.1109	0.6037	0.291	-0.1532	-0.4205
103392	1.2459	-0.0635	0.3197	-0.1106	0.3685	0.1055	0.3861	0.2513	0.1335	0.3254	-0.577	-0.254	-0.3946	0.2623	0.5275	0.4447	-0.2853	0.2763	-0.0568	-0.0972	0.3752	-0.0754	-0.1768	0.2469	0.4361	0.6345	-0.1083	-0.5299	0.3901	-0.1953	-0.1563	-0.2862	-0.7003	-0.5102	-0.9108	-0.6966	-0.1386	0.145	-0.062	-0.071	-0.2142	0.3473	0.2716	0.099	0.4564	0.4933	-0.2472	-0.2769	-0.0287
103395	0.2972	-0.3219	-0.3867	-0.1829	0.3637	-0.1539	0.3727	-0.1163	-0.1701	0.1162	-0.0369	-0.1444	0.0043	0.2289	0.4809	0.1129	-0.7754	0.0994	-0.1788	-0.2229	0.1688	0.0642	0.3179	0.123	0.4418	0.3648	-0.132	0.0237	-1.5774	-0.2523	0.2106	-0.1136	-0.1957	-0.2119	-0.1139	-0.161	-0.104	-0.5744	-0.0265	0.2479	-0.0051	-0.0991	0.3255	0.3337	0.1755	0.4957	0.2666	0.0945	-0.1282
103409	0.0816	-0.4777	-0.3956	-0.3013	-0.3535	0.3684	-0.2483	-0.3356	0.0995	0.4525	-0.4219	-0.1784	-0.5778	-0.071	-0.2574	-0.102	0.0716	-0.4249	-0.3668	-0.1823	-0.1865	-0.0881	-0.4962	0.1211	-0.0077	0.1931	-0.1537	0.3395	0.4117	-0.4357	0.2769	-0.3886	-0.1952	-0.149	-0.2692	0.1653	-0.1897	0.1751	0.1438	-0.197	-0.0489	0.2366	-0.0957	0.1318	-0.0715	-0.0329	-0.3049	-0.4478	0.653
103413	0.3686	-0.0325	-0.2668	0.0186	0.0375	-0.0352	-0.2815	0.7143	0.7068	0.7842	-0.5102	0.0193	-0.4791	-0.3443	-0.2009	-0.166	-0.0384	-0.4264	0.0916	0.2926	-0.4085	-0.4215	0.092	-0.2885	-0.2235	0.0875	-0.5175	-0.1181	0.262	-0.8706	-0.0337	-0.2876	-0.1928	0.1012	0.0636	-0.0313	0.2624	0.542	0.8647	0.0782	-0.2442	0.7355	0.1528	-0.288	-0.5481	-0.2211	0.1621	-0.1428	0.3043
103415	-0.1528	0.0237	-0.4722	0.1536	-0.0798	0.324	0.0865	0.2271	-0.1381	0.0876	0.1107	0.0094	0.0878	0.0518	-0.1309	-0.3637	-0.2499	0.1285	0.1218	-0.0945	-0.266	-0.1655	-0.1064	0.048	-0.1708	0.1918	-0.0902	0.0061	-0.9154	-0.2567	0.0894	-0.0356	-0.2632	-0.0928	0.263	-0.0965	-0.0547	0.1472	0.25	0.0943	-0.3328	0.2877	0.2104	0.2408	-0.0352	0.3252	0.1363	0.1084	-0.0687
103418	-0.3411	0.0147	-0.6106	0.2242	0.2351	0.0563	0.4128	0.0222	-0.1899	0.1781	-0.2868	0.1885	-0.0331	0.1277	0.1744	0.0682	0.1961	-0.531	0.0757	0.2309	-0.1808	-0.0808	-0.019	0.1954	-0.0998	0.2128	0.1317	-0.0486	0.4778	-0.1384	-0.0517	0.0876	0.1348	-0.0576	-0.2539	-0.243	0.2569	0.3402	0.3927	0.2099	-0.3276	0.4404	-0.0688	0.0565	-0.318	0.6247	0.2391	-0.3611	0.4477
103423	-0.0565	-0.1701	-0.3617	0.0955	0.0218	0.0106	-0.015	0.1773	0.3159	0.3712	-0.1973	0.1648	-0.0556	-0.0832	0.0453	0.0008	-0.1444	-0.0234	0.1247	0.1924	-0.1477	-0.1077	-0.1638	-0.1553	-0.1385	0.0984	-0.1113	-0.0174	0.2671	-0.1073	-0.1713	-0.0309	0.1527	-0.2054	0.1329	-0.1724	0.4543	0.0365	0.1827	-0.1858	-0.0941	0.1941	-0.1649	-0.1799	-0.1569	-0.0272	-0.1336	-0.1034	0.1996
103430	-0.1825	0.4337	0.9862	0.1811	0.2035	-0.7503	-0.2365	-0.4613	-0.3335	-0.9818	0.1641	-0.2125	0.5095	0.1481	-0.0973	0.1273	-0.2689	0.2913	-0.4328	-0.8597	0.3327	-0.1961	-0.0717	-0.2123	0.1665	-0.8981	0.0149	-0.4617	-1.173	0.8355	0.0547	0.2703	-0.1938	0.2067	0.3853	0.1663	-0.3332	-1.2348	-0.825	0.1701	0.4887	-0.963	-0.1745	-0.2259	0.0461	-0.6109	-0.2654	0.1449	-0.8929
103441	-0.0842	0.1943	-0.4631	0.1073	-0.1369	0.2998	0.1132	0.228	0.4187	0.3079	-0.2706	-0.0157	-0.1071	-0.1488	0.2148	0.0034	0.0007	-0.1545	0.0426	0.2039	-0.2171	-0.2077	0.1051	-0.2709	-0.2164	0.356	-0.0958	0.5896	-0.2699	-0.0993	0.1728	0.04	0.1912	-0.0655	-0.0966	-0.3068	0.2908	-0.081	0.2929	0.1123	-0.0627	0.0741	0.0662	0.1117	-0.0039	-0.1023	0.0447	0.239	0.2107
103446	-0.2805	0.4176	0.6602	0.0718	-0.1318	-0.5726	-0.4006	-0.3604	-0.1276	-0.7171	0.1767	-0.0135	0.0552	-0.2849	-0.368	0.0925	-0.1529	0.3083	-0.2106	-0.3239	0.2066	-0.0475	0.0236	-0.2892	-0.1475	-0.8214	0.0626	-0.4117	-0.6714	0.5721	-0.484	0.1323	-0.1696	0.1901	0.4064	0.1242	-0.132	-0.861	-0.8929	0.0413	0.6144	-0.7476	-0.2187	-0.1566	0.2974	-0.6114	-0.4695	0.2433	-0.4627
103451	1.167	-0.1326	0.1881	-0.2335	-0.0793	0.4567	0.7183	0.7115	0.1047	0.6183	-0.4873	-0.2109	-0.4408	0.0639	0.6512	0.7062	0.3548	-0.3207	0.1857	0.0578	0.4648	0.3272	0.2604	-0.1002	0.5232	0.2602	-0.023	0.0103	1.16	-0.3537	0.0866	-0.1065	-0.1331	-0.337	-0.7812	-0.1342	0.4957	0.6798	0.018	-0.0643	-0.7148	0.1756	0.2626	0.1626	0.5233	0.7664	-0.1098	-0.0048	0.3315
103457	0.1798	-0.4783	0.0183	0.1546	0.3566	-0.1459	0.6101	0.0126	0.0682	0.0157	0.1255	-0.0268	-0.3735	0.45	0.0053	-0.2548	-0.0667	0.2857	0.1174	-1.3492	0.1647	0.2239	0.0669	-0.0995	0.0191	0.1744	-0.0675	0.0153	0.3069	0.0876	-0.0207	0.2659	-0.2414	0.0406	-0.3785	-0.1466	-0.2152	0.6294	-0.1274	0.2057	-0.0404	0.0256	0.2627	0.179	0.3022	1.0916	0.0606	0.0156	-0.0347
103461	0.0122	0.8335	0.6318	0.0338	-0.0426	-0.0411	0.1233	-0.1677	0.2649	0.1848	-0.8473	-0.3928	-0.2312	-0.206	-0.2902	0.4705	-0.1753	0.1811	-0.1436	-0.069	0.2009	-0.4544	-0.2706	0.0084	-0.0689	-0.6375	-0.3929	-0.2507	-0.1446	0.0854	-0.145	-0.1219	0.0682	-0.0268	-0.406	0.0119	-0.1556	-0.3001	0.2838	-0.0454	0.3918	-0.6235	-0.0545	-0.2999	0.0007	-0.0795	-0.2662	-0.3271	-0.3146
103463	-0.3258	-0.0806	-0.3167	0.1653	-0.1986	0.3752	0.0773	-0.0259	-0.0378	0.144	0.1088	0.0577	-0.1983	-0.0435	-0.218	-0.0849	-0.1063	-0.3826	0.0854	0.7223	-0.3787	0.1143	-0.285	-0.155	-0.306	0.0809	0.1043	0.2313	0.2852	-0.1535	-0.0966	0.3589	0.3073	0.1304	-0.0765	0.2492	0.0869	0.4425	0.2672	-0.0152	-0.4076	0.3091	-0.0988	-0.0055	0.2131	0.2544	-0.0845	-0.2017	0.2378
103465	-0.1152	-0.5593	-0.6976	0.1113	-0.0612	0.1918	0.0478	0.6964	0.2203	1.194	-0.1726	0.005	-0.0821	-0.1544	0.2637	-0.4707	0.2515	0.1798	0.5541	0.1787	-0.2034	-0.5625	-0.3643	-0.1761	-0.17	0.1367	-0.6677	0.4375	-0.5581	-0.5664	-0.2563	-0.5064	-0.3721	-0.3594	-0.0408	-0.3366	0.4018	0.0316	0.4526	-0.4134	-0.3037	0.6594	0.0697	0.2454	-0.5573	-0.1905	0.02	-0.1064	0.2774
103476	0.1539	0.6172	-0.1357	-0.233	0.0419	0.1293	0.0425	-0.5341	0.1979	-0.2671	-0.5856	0.4106	-0.4558	0.1291	-0.3255	0.0271	0.0975	-0.5138	0.0775	0.4044	-0.2382	0.0035	-0.0388	0.2948	0.046	0.2702	0.0303	0.1766	0.1984	-0.4309	-0.0429	-0.2021	-0.1045	0.1696	-0.0233	0.7951	-0.0908	0.6205	0.006	-0.0994	-0.0355	0.1392	0.2061	-0.4861	-0.8077	0.3546	0.1321	0.067	0.1288
103481	0.0036	-0.0058	-0.2078	0.1479	0.0296	0.1786	0.3286	0	-0.1078	0.0271	0.3409	0.332	0.2735	0.2112	0.1661	-0.2537	0.3872	-0.0414	0.2368	0.4433	0.0462	0.2558	-0.087	0.3362	-0.0247	0.3694	0.4405	0.3018	0.5644	0.058	-0.1788	0.0519	0.0105	0.0575	0.0473	-0.2247	0.2569	0.8844	0.6023	0.322	-0.3884	0.6574	0.0957	0.114	-0.3221	0.3896	0.3503	-0.0237	-0.0974
103491	0.2019	-0.1613	-0.4317	0.3438	0.2109	0.1759	0.1867	1.1021	-0.0315	0.8466	0.1674	0.2052	0.486	-0.0771	0.314	0.089	-0.2136	-0.0331	0.4993	0.194	0.2974	-0.0286	0.019	-0.1347	-0.106	0.0953	0.1495	-0.0279	-0.3199	-0.4858	0.5129	-0.3113	0.3422	-0.483	0.0837	0.1523	0.7749	0.3619	0.474	-0.3411	-0.2023	0.4222	0.1061	0.2641	-0.3022	0.6945	0.4395	-0.2967	-0.2814
103516	-0.1574	0.4001	0.6842	0.0601	-0.162	-0.0967	-0.2634	-0.2802	0.0327	-0.7358	0.3373	0.3436	0.2236	-0.3043	-0.2016	0.208	0.099	0.1314	0.0779	-0.4347	0.1738	-0.029	-0.1135	0.0865	-0.287	-0.6359	0.2211	-0.0917	0.2309	0.5277	-0.1444	0.1286	0.1041	0.2385	0.3023	0.4833	-0.2306	-0.3836	-0.5076	-0.0405	0.267	-0.5585	-0.1531	-0.0149	0.0788	-0.5049	-0.2379	0.1871	-0.0434
103522	0.901	-0.2548	0.1635	-0.399	-0.1863	0.5441	-0.1827	-0.6525	-0.0591	0.2201	-0.6715	0.0053	-0.7026	0.1884	-0.0735	-0.167	-0.3124	-0.2029	-0.564	-0.5067	-0.1268	-0.1428	-0.3219	0.0877	0.3873	0.4435	-0.2319	0.1683	0.0009	-0.1691	0.8127	-0.3263	0.1148	-0.1899	-0.3605	0.1865	-0.4063	0.1529	-0.3101	-0.1966	-0.0547	-0.0605	-0.1305	0.1646	0.1685	0.0393	-0.2281	-0.3576	0.4087
103537	0.3563	0.2885	0.1946	-0.5195	-0.5142	-0.3434	-0.4099	0.3785	0.2012	-0.0364	-0.0728	0.1766	0.0502	-0.5636	0.031	-0.2139	0.0197	0.2326	-0.5803	-0.2336	-0.2295	0.1853	0.4704	0.3432	-0.474	-0.3099	-0.1706	-0.2338	-0.2061	0.2831	0.2897	0.3228	0.0403	0.4066	-0.1156	0.6567	-0.3818	0.1621	-0.7422	0.0138	0.4108	-0.1824	-0.382	-0.4101	-0.014	-0.4729	-0.2034	0.259	0.4484
103567	0.0876	0.5865	-0.4617	-0.1064	0.0647	-0.8189	0.0268	-0.2094	-0.1302	-0.7374	0.2047	-0.275	0.1603	0.0717	0.1787	0.0097	0.6382	-0.0482	0.0467	0.7793	0.0152	-0.2619	0.0631	-0.0201	0.3956	-0.0865	0.2841	-0.2689	0.7589	0.6236	-0.2707	-0.0974	-0.0077	0.0682	0.2505	0.0072	-0.2721	-1.3399	-0.5025	-0.1911	0.3994	-0.9097	-0.009	-1.0542	0.2033	-0.2424	-0.1701	0.6663	-0.3685
103585	-0.0981	-0.0246	-0.0118	-0.0805	0.159	0.3506	0.1072	-0.0386	0.0368	-0.0165	0.3673	0.284	0.1163	0.0096	-0.3178	-0.094	-0.2843	-0.04	0.1629	-0.0253	-0.2324	0.2345	0.175	0.1372	-0.163	0.1295	0.3341	0.193	-0.1525	0.1602	0.2447	0.3227	0.0753	0.2906	-0.2447	0.1914	-0.1099	0.4621	-0.1216	0.2481	-0.2558	0.2052	0.0218	0.4605	0.3465	0.194	-0.0128	-0.007	0.3371
103587	-1.2987	0.5548	-0.0594	0.2577	0.9377	-1.3682	0.9758	0.6736	1.0821	-0.0978	0.2114	1.2149	0.4407	-0.2615	-0.0451	0.6373	-0.5667	0.3271	-0.6825	0.9985	0.7588	0.8759	-0.1775	-1.1727	0.891	0.5675	0.752	0.7059	1.5864	-0.2691	-0.4295	0.1281	0.1686	0.9226	0.155	0.9445	-0.4307	0.3178	1.1512	1.2011	0.5156	0.98	0.9985	-0.5592	0.2228	0.9245	0.0431	0.915	-0.241
103589	-0.3534	0.4181	0.2174	0.285	-0.2871	-0.4432	-0.1482	-0.0139	-0.335	-0.6413	0.307	0.415	0.267	-0.2345	-0.3174	0.1159	0.5689	-0.4233	-0.1622	-0.6284	0.1961	0.0559	-0.4697	-0.0997	-0.3843	-0.7004	0.2244	-0.1531	0.4873	0.6279	-0.595	0.0716	-0.0139	0.6191	0.4415	-0.2228	-0.1492	0.0158	-0.3655	-0.0781	0.2479	-0.1303	-0.6544	-0.2979	0.0095	-0.2937	-0.0631	0.3227	-0.5341
103604	-0.1207	-0.0201	0.0169	-0.3602	-0.1912	0.1489	-0.2386	-0.6463	-0.0453	-0.153	-0.1707	0.2072	-0.6003	0.1545	0.1835	-0.0095	-0.2145	-0.6199	-0.2881	-0.0365	0.1738	0.1683	0.0318	0.5003	0.2346	0.1686	0.1547	0.3919	0.6788	0.1657	0.187	0.1321	0.6441	0.0822	-0.2115	0.2191	-0.286	0.3434	-0.0553	-0.326	0.0748	-0.1543	-0.1101	0.0227	0.0041	0.2787	-0.1441	-0.1466	0.4085
103617	0.4799	-0.0234	-0.2951	-0.0725	0.1518	0.3625	0.1781	0.9143	0.4473	0.6665	-0.322	0.0012	0.0253	-0.219	0.2691	0.1688	0.2521	0.3504	0.4435	0.22	0.1246	0.1332	0.2178	0.0821	0.1491	0.5063	-0.6287	0.5101	1.3069	-0.5025	0.2386	0.0493	0.1533	-0.301	-0.4094	-0.0168	0.3212	0.6869	0.0211	0.2022	-0.2655	0.6416	0.0681	0.1632	0.0651	0.2248	0.1697	0.1535	0.2602
103624	-0.1104	-0.1291	-0.8711	-0.1038	0.1955	0.0381	-0.0491	2.9723	0.8629	1.9416	-0.4061	-0.0916	0.3132	-0.2589	0.9352	-0.4991	0.1196	1.0606	1.1643	1.2284	0.0036	-0.9862	0.1064	-0.3648	-0.4035	0.3414	-0.9189	0.3155	-0.5742	-1.1495	-0.1872	-0.936	-0.8693	-0.6943	0.0201	-0.3485	0.7479	0.4829	0.5378	-0.1541	-0.2818	0.7701	0.8175	0.7585	-1.0196	-0.4991	0.2729	-0.0972	-0.0439
103625	0.1338	-0.2273	-0.0624	0.1727	-0.1543	0.2797	0.3891	0.2576	-0.0669	0.483	-0.5258	0.2075	-0.0101	0.1039	0.0766	0.157	0.5823	-0.5083	0.66	0.2915	0.1299	0.1301	0.5115	0.1691	0.0275	0.5821	0.2415	-0.1917	0.5791	-0.0526	0.0148	0.2271	0.0464	0.1406	-0.2105	-0.2823	0.1749	0.9913	0.4896	0.1768	-0.2187	0.685	0.2099	-0.0514	0.0067	0.7715	0.3738	-0.2473	0.3091
103641	-0.3694	-0.3152	-0.3212	0.0326	0.2174	0.2312	0.3507	-0.0896	-0.2371	-0.0403	0.2499	0.1942	0.1693	0.2553	0.2547	0.2286	0.2157	0.0491	0.2354	0.2668	0.1366	0.2021	0.2439	0.0928	-0.0209	0.3751	0.3653	0.2064	0.5726	0.1643	0.0326	0.3004	0.3063	0.2291	0.0641	0.2165	-0.1074	0.5839	0.1601	-0.1316	-0.1009	0.1897	0.1987	0.2074	-0.057	0.4656	0.3594	0.1601	0.1698
103678	0.0648	0.2378	0.3112	0.1999	0.3013	-0.4964	0.0425	-0.5099	-0.1544	-0.2887	-0.0125	-0.1026	0.3244	0.1077	0.056	-0.0366	-0.202	0.068	-0.2006	-0.2586	0.2141	0.0431	0.2587	0.1262	0.1354	-0.1084	0.2673	-0.6678	-0.8634	0.4404	0.1512	0.1761	0.3191	0.0933	0.37	0.0594	0.0327	-0.0217	-0.5051	0.1696	0.0558	-0.278	-0.109	0.0224	-0.0724	-0.2485	0.0634	-0.0991	-0.1987
103682	0.0841	-0.0292	-0.2111	-0.1425	-0.0267	0.142	0.103	-0.571	-0.3557	-0.5456	0.4188	0.3586	0.1348	0.3237	0.1319	-0.0799	-0.1649	-0.2326	-0.1138	-0.4704	0.0315	0.3018	0.4453	0.1458	-0.0257	0.3965	0.3732	-0.0265	-0.2272	0.2853	0.1982	0.2188	0.2051	0.3408	0.0769	0.2389	-0.1723	0.3272	-0.514	0.0717	-0.1027	-0.1349	0.1348	0.4823	0.3728	0.5276	0.3697	0.1987	0.2068
103690	0.0123	0.4828	0.5065	0.3668	-0.2928	-0.1243	-0.049	-0.1319	0.0613	-0.6199	0.0344	0.4771	-0.0331	-0.0068	-0.4153	0.0527	-0.0842	-0.1332	-0.0959	0.4031	0.0916	-0.0367	-0.2022	-0.1875	-0.5066	-0.0641	0.1843	0.1103	0.037	-0.0305	-0.3345	-0.0585	-0.1142	0.1778	0.0804	0.0077	0.036	0.0076	-0.5516	-0.1076	0.031	-0.2158	-0.1079	-0.4496	-0.0381	-0.2587	-0.1328	-0.0061	-0.1729
103693	0.0579	0.2548	-0.4565	-0.0355	0.2877	0.5736	0.5481	0.6152	0.1401	0.3419	0.033	0.1058	0.3109	-0.1718	-0.1365	-0.1209	0.1566	0.1443	0.6048	0.2586	-0.0712	0.2036	0.1494	-0.1315	0.0791	0.1813	0.1221	0.1788	0.1207	-0.309	-0.376	-0.3368	0.132	-0.474	-0.0412	-0.4672	0.3196	0.1933	0.3379	0.1095	-0.2172	0.2754	-0.1097	0.2745	-0.2155	0.4993	-0.0352	0.1823	0.0542
103694	0.4007	0.0344	-0.443	0.1144	0.0523	-0.1217	-0.0232	0.6887	0.6364	0.7463	-0.5029	0.0043	-0.1393	-0.137	-0.2857	-0.0088	0.0677	-0.303	0.1307	0.5026	-0.3146	-0.4427	0.0446	-0.3561	-0.2218	-0.0778	-0.5475	-0.2972	0.5185	-0.782	-0.2185	-0.2259	-0.2166	-0.0472	0.1923	-0.0036	0.5155	0.5946	0.8511	0.0649	-0.1892	0.4358	0.1741	-0.3765	-0.5193	-0.2067	0.1283	-0.1713	0.1839
103705	0.3109	0.124	-0.5666	-0.0248	-0.0284	0.668	0.1347	1.134	0.3037	0.9224	0.291	-0.0869	0.193	-0.0417	0.0954	-0.336	-0.1372	0.0251	0.2893	0.4632	-0.3025	-0.1959	0.045	-0.1749	-0.0223	-0.0737	-0.2119	0.4859	0.4489	-0.4766	0.4103	-0.4694	0.0495	0.0239	-0.0113	0.1557	0.3244	0.1894	0.6728	0.2727	-0.4624	0.7713	0.1468	0.3904	-0.201	-0.149	0.2408	0.0971	0.2944
103717	0.4979	-0.1905	0.6608	-0.34	-0.364	0.805	0.1433	0.4342	0.3193	-0.1685	-0.142	0.4294	0.2452	0.2274	0.5	0.155	0.8898	-0.4471	0.0536	0.7191	-0.1137	0.4956	0.3342	0.8251	0.1363	0.2846	0.2509	0.1433	1.0848	-0.096	0.6394	0.1855	0.5103	0.2293	-0.3781	0.1842	0.0234	0.3273	-0.164	0.3029	-0.2138	0.2866	-0.108	0.1131	0.4597	0.2986	-0.2044	0.0687	0.3644
103719	-0.1893	0.2556	0.3788	0.1179	0.0388	-0.6871	-0.2969	-0.3243	-0.0343	-0.255	-0.1175	-0.4562	-0.0112	0.0633	-0.0672	0.1042	0.2134	-0.2756	-0.3752	-0.295	0.0832	0.1372	-0.0459	-0.0057	0.0864	-0.7342	0.0075	-0.3285	-0.3654	0.3137	0.2946	-0.104	0.1667	0.3054	0.2073	0.2389	-0.4148	-0.5559	0.1981	0.0946	0.3039	-0.651	-0.2076	-0.3846	0.0607	-0.8259	-0.3248	-0.0707	-0.5862
103720	0.7389	0.1916	0.0493	-0.1965	-0.0027	0.2364	0.2596	0.1242	0.148	0.3217	-0.3109	0.3403	-0.2153	-0.0107	0.728	-0.0159	0.33	0.3381	0.0283	-0.0975	0.2198	0.535	0.143	0.2855	0.2301	0.302	-0.0406	0.2773	0.3962	-0.1479	-0.0131	-0.4427	-0.2809	-0.5142	-0.5468	-0.3703	0.1508	0.3226	0.3948	-0.4804	-0.2167	0.2655	0.1625	0.3853	0.4803	0.5382	-0.0045	0.1789	-0.1325
103726	-0.201	-0.4812	-1.1842	-0.0854	0.3262	0.0346	-0.1626	1.9579	0.6635	1.7635	-0.2864	-0.1485	0.1854	-0.3158	0.5596	-0.3995	0.1081	0.9353	1.1698	0.8915	-0.1333	-0.7245	-0.0089	-0.2199	-0.3507	0.3994	-0.9219	0.2791	-0.4856	-1.2333	-0.2335	-0.9426	-0.5888	-0.5775	0.388	-1.4199	0.9415	0.1258	0.6482	-0.5233	-0.3593	0.5163	0.6367	0.3429	-0.9529	-0.5202	0.1954	-0.3221	-0.3412
103754	0.902	-0.5144	0.0485	-0.5274	-0.1669	0.2946	-0.0649	-0.0087	0.2661	0.1968	-0.6543	-0.4333	-0.5022	0.4453	-0.7115	0.1006	-0.4066	-0.4571	-0.7971	0.4337	-0.373	-0.1475	0.2933	0.1813	0.3213	0.5706	0.4062	-0.5855	0.5076	-0.475	1.1192	-0.13	-0.0739	0.0374	-0.3697	0.0398	-0.3871	0.0089	-0.5271	-0.0758	0.0639	0.226	0.3327	-0.1002	0.1011	-0.1282	-0.0635	-0.6231	0.2634
103786	-0.4724	0.3851	0.8018	-0.4772	0.2678	-0.3548	0.332	0.3533	0.0002	-0.3577	-0.0823	0.0031	-0.4062	0.1024	0.2182	0.7914	0.1406	1.0362	-0.4719	-0.3887	0.741	-0.3107	0.2331	-0.8007	0.0899	-0.0285	0.3227	-0.0299	0.2577	0.2986	0.0677	0.3281	-0.8185	-0.0255	-0.2932	0.5052	-0.568	-0.1962	-1.4024	0.2834	0.3734	0.1519	0.254	-0.688	0.0019	-0.7519	0.2466	0.6502	-0.3689
103793	0.0268	0.6846	0.2434	-0.4612	-0.1642	0.3321	-0.3641	0.8184	0.452	-0.0553	-0.3626	-0.0507	-0.0104	-0.4239	0.155	0.0964	0.2929	0.2765	0.1278	0.3947	-0.9496	-0.0346	-0.1371	-0.3212	-0.5541	-0.2898	0.215	-0.3601	-0.1577	-0.3034	0.021	-0.1094	-0.322	-0.1722	0.2488	-0.7158	0.1643	0.1673	1.5792	-0.7357	0.1214	0.6218	-0.5357	0.0951	0.4713	-0.4981	0.2334	-0.0469	0.0187
103810	0.3472	-0.8684	0.2621	-0.3183	0.2053	-0.1892	0.1135	-0.0534	-0.2377	0.0836	-0.6573	-0.2476	-0.2418	0.5996	-0.2393	0.3353	0.1745	-0.2124	-0.2372	0.21	0.3008	0.1892	0.189	0.577	0.4147	0.3522	0.1106	-0.6163	0.5135	-0.4719	0.3654	-0.0878	0.1703	0.256	-0.2063	0.2509	-0.2918	0.394	0.152	0.2827	-0.0012	0.2362	-0.0746	-0.4137	0.1604	0.2013	-0.0065	-0.7081	-0.1521
103831	-0.5864	0.777	-0.0073	0.4248	-0.0334	0.1006	0.1569	0.072	0.5151	-0.3233	0.2758	0.4392	-0.3329	-0.5008	-0.4922	0.0989	0.2611	-0.0682	-0.4608	0.145	0.0156	-0.3762	0.1434	-0.1494	-0.7218	0.284	-0.0377	0.4365	0.0358	-0.5734	-0.9193	-0.6901	-0.2656	0.6656	-0.0577	0.0309	0.5194	-1.0973	-0.6456	-0.5796	0.1754	-0.6037	0.0986	-0.1274	-0.2995	-0.2763	-0.3814	-0.2304	0.017
103851	0.0946	-0.2449	0.0602	0.0402	0.0709	0.2433	0.3048	0.6277	0.1162	0.3567	-0.1705	0.1199	0.2134	-0.0353	-0.0467	-0.1251	-0.2576	0.0435	0.1125	0.3718	-0.4188	-0.1976	-0.0668	0.045	-0.1234	0.4296	-0.3485	0.3551	0.0495	-0.3746	-0.0207	-0.3843	-0.0175	-0.3052	-0.3709	-0.3523	0.2858	0.52	0.1667	-0.3533	-0.3045	0.6727	0.0159	0.0663	0.0045	0.5335	0.1658	0.0712	-0.015
103870	1.2346	-0.3651	0.0222	-0.493	-0.1584	0.3749	-0.0487	-0.1674	-0.0919	0.3635	-0.7229	-0.4838	-0.7962	0.3909	0.1194	0.3713	0.0251	-0.0278	-0.0503	0.2516	-0.0338	-0.0119	0.3033	0.2127	0.1775	0.3807	-0.1702	-0.1507	-0.0137	-0.4313	-0.0404	0.1822	-0.541	-0.0995	-0.7223	-0.1556	0.1934	-0.021	-0.5822	-0.39	-0.1252	0.1285	0.22	0.484	0.1169	0.5216	-0.3939	-0.1307	0.4063
103907	0.1347	-0.2039	0.2037	0.0338	0.0123	-0.53	-0.1042	-0.6594	-0.1637	-0.4427	-0.393	-0.7045	-0.0393	0.4669	-0.1109	0.117	-0.1124	0.0267	-0.3365	-0.0876	0.235	0.0401	-0.0754	0.0557	-0.1437	-0.5002	0.0799	-0.828	-0.3264	0.2007	0.0984	0.3992	-0.0069	0.1162	0.1334	0.54	-0.5706	-0.0093	-0.0629	0.5821	0.1693	-0.5599	-0.2348	-0.3131	0.2139	-0.0834	0.207	-0.423	-0.3756
103910	0.1177	1.1886	0.685	0.0749	0.5339	-0.4975	-0.3949	0.4364	0.1885	-1.027	-0.2062	0.7865	0.1209	0.3277	0.4603	-0.3451	0.0393	0.7933	0.5571	-0.3835	-0.0558	-0.4756	0.5843	0.0436	-0.5648	-0.7053	-0.3482	0.6988	-0.4006	-0.3126	-0.3251	-0.0225	-0.3748	0.2431	0.4778	0.4802	-0.0833	-0.7888	1.2935	-1.2592	0.416	-0.5986	-0.126	0.0582	0.7099	-0.5976	-0.0576	0.6709	-0.102
103919	1.5211	-0.3813	0.1937	-0.1862	0.0641	0.2812	0.2994	-0.2171	-0.4557	-0.0864	-0.7117	0.1603	-0.3943	0.3431	-0.5528	0.414	-0.0267	-1.1913	-0.1103	0.2832	-1.2489	0.3956	0.204	0.2196	0.5112	0.2759	0.2022	-0.3365	0.548	-0.131	0.1573	-0.0499	-0.3994	-0.1314	-0.7369	0.1908	-0.3295	0.8565	0.1931	0.0866	-0.1621	0.0015	1.2101	-1.7358	0.4341	1.1428	-0.0307	-0.0656	0.0971
103928	-0.0149	-0.8349	-0.0736	0.2557	-0.6185	-0.6896	-0.1502	-0.5688	0.5686	-0.2612	-0.0513	0.035	-0.0455	-0.3473	-0.4549	-0.0441	-0.8637	-1.3636	-0.6759	0.3555	-0.499	-0.0792	0.5431	0.6353	-0.6683	0.4767	-0.0583	-1.3213	0.2247	-0.2617	-0.2022	0.0727	-0.1085	0.5768	-0.0246	0.3662	-0.067	0.2945	-0.2112	-0.4881	0.4796	0.4772	-0.4581	-0.6118	-0.0881	0.1929	0.0561	-0.4188	1.3574
103944	-0.0021	0.0711	0.4833	0.0302	-0.0019	-0.5916	-0.4465	-1.0537	-0.2062	-0.6577	0.2954	-0.4664	0.1725	0.2756	-0.3609	0.1245	0.1211	-0.286	-0.1296	-0.8461	0.1605	0.056	-0.2036	-0.0871	0.1215	-0.3292	0.1058	-0.2788	0.1814	0.5323	0.0636	0.2089	-0.0736	0.2108	0.3319	0.27	-0.5584	-0.1004	-0.5268	0.3401	0.3304	-0.8585	0.0638	-0.2468	-0.4108	-0.1341	0.0434	0.2859	-0.7787
103950	0.9954	-0.7863	-1.8729	0.2671	0.3757	-0.1577	-0.8556	-0.5146	-0.1261	0.3643	0.1695	-0.2303	-0.1138	0.2945	-0.9431	-0.5125	0.8801	-1.0445	0.118	0.6048	-1.612	-0.143	0.1392	0.856	-0.1851	1.0299	0.1628	1.2774	0.3555	0.1853	0.3587	-0.0779	0.39	0.5768	0.3247	0.9825	-0.5106	0.1041	1.2927	-1.8423	-2.12	0.7576	-0.9216	0.7187	-0.9904	0.0301	1.3934	-0.1627	0.697
103970	0.029	-0.2948	0.1078	-0.2481	-0.0186	-0.1422	-0.198	-0.3689	-0.2164	-0.3469	0.2321	-0.1783	-0.3433	0.1221	-0.3074	-0.1254	-0.0542	-0.2809	-0.1241	-0.1829	-0.0015	-0.022	-0.1775	0.1049	1.304	-0.1976	0.1104	-0.0613	0.1835	0.4799	0.0542	0.2649	0.014	-0.0456	-0.1025	0.1167	-0.5566	-0.1472	-0.3239	0.2539	0.0277	-0.1918	-0.1338	-0.113	-0.0275	-0.4535	0.0232	-0.0314	0.0195
103999	0.7452	-0.7745	0.1095	-0.4749	-0.0046	0.1556	0.022	-0.6732	0.0108	-0.2594	-0.5815	-0.1588	-0.4273	0.1821	0.4513	-0.0455	-0.4633	-0.3201	-1.0492	-0.2301	0.2575	0.0894	-0.3066	0.4013	0.3608	0.5364	-0.3538	-0.0534	0.2414	-0.216	0.317	-0.18	-0.3585	0.0137	-0.7343	0.4688	-0.4542	0.1175	-0.7274	0.1207	0.0457	0.0868	0.2381	0.1095	0.7464	0.4809	-0.4601	-0.4519	0.5882
104009	0.5226	0.421	-0.2434	-0.1634	0.1885	0.3559	0.1928	0.5551	0.2078	0.3768	-0.4881	0.1521	0.4438	0.3024	0.093	-0.3336	-0.0115	-0.364	0.6407	0.6918	0.1465	0.0981	0.266	-0.2338	0.291	0.4274	0.1221	0.1692	0.6571	-0.2258	-0.2147	0.1615	0.6537	-0.6485	-0.1079	-0.3282	0.275	0.7746	0.8315	0.0338	-0.2948	0.0456	0.0341	0.7299	0.2506	0.5137	0.3423	0.4116	-0.0134
104054	0.9316	-0.5743	0.8137	-0.4953	-0.6923	0.5081	0.6471	0.5342	0.0542	0.0773	0.1154	0.2009	0.0493	0.2985	-0.0829	0.2852	0.1139	-0.3032	-0.1841	-0.1612	0.3104	0.0468	0.2256	0.2173	0.5545	-0.6883	0.3204	-0.7184	0.5667	0.102	0.0703	0.1916	-0.2054	-0.3538	-0.6926	-0.2366	-0.5152	0.8719	-0.2302	-0.0188	-0.3294	0.3483	0.0265	-0.314	0.6616	0.6338	-0.1254	-0.0866	-0.2676
104057	0.4456	0.0111	-0.4033	0.1454	0.2158	0.3797	0.3674	0.5031	-0.1585	0.4534	0.031	0.0347	0.1516	0.1392	0.461	-0.1419	0.1747	0.0623	0.5025	0.2745	0.0509	0.0036	0.0379	-0.0105	0.4619	0.223	0.1692	0.1512	0.0873	-0.1794	0.0855	-0.1881	0.0111	-0.432	-0.1726	-0.3748	0.4292	0.4892	0.5162	-0.0376	-0.4161	0.4839	0.0707	0.268	-0.0023	0.5561	0.2226	0.1421	-0.0576
104059	-0.1403	-0.1856	-0.4394	-0.062	-0.0112	0.1045	0.2695	-0.3131	-0.2819	-0.1664	0.3616	0.6961	0.1204	0.2497	0.2415	-0.1217	0.2991	-0.2679	0.0777	-0.7248	-0.2545	0.2851	0.1021	0.3185	-0.0282	0.126	0.4066	0.6648	0.307	0.1136	-0.0437	0.3127	0.2406	0.1988	0.0013	-0.1797	-0.5767	0.6271	0.2298	-0.1066	-0.0812	0.1955	0.0145	0.4193	-0.025	0.3833	0.306	0.1678	0.6837
104096	-0.4471	-0.355	-0.2865	0.2358	-0.1449	0.5157	0.04	-0.1646	-0.0742	0.0014	0.1439	0.3933	0.0871	-0.1494	-0.4385	-0.2583	-0.1448	-0.1083	0.2052	0.2543	-0.3913	0.0955	-0.144	-0.1181	-0.1193	0.2299	0.1592	0.2987	0.3646	-0.0832	0.1452	0.0819	-0.0366	0.2438	0.171	-0.0237	-0.0267	0.5393	0.4196	0.1596	-0.4064	0.3432	-0.0706	0.2246	-0.5939	0.5399	0.3277	-0.1635	0.2708
104115	0.6508	-0.3646	-0.2085	-0.1179	0.2226	0.2354	0.7735	0.3256	0.1838	0.634	-0.2376	-0.1015	0.0036	-0.0255	0.4975	0.2272	-0.0581	0.0654	0.2324	0.4848	0.3973	0.0325	0.498	0.2199	0.705	0.5897	0.0608	0.0549	0.0936	-0.5348	0.2049	-0.1531	-0.3823	-0.3149	-0.2693	-0.6231	0.2665	0.0462	-0.0378	0.0202	0.0148	0.4017	0.2894	0.1511	0.4436	0.7223	-0.0238	-0.0673	-0.1534
104116	0.2207	0.1006	0.3227	0.1083	0.3835	0.0259	0.796	-0.5266	-0.0389	-0.5338	0.5015	0.0131	-0.1928	0.0786	0.143	-0.0696	0.2273	0.3548	0.2556	-0.2838	0.0152	0.048	-0.0135	0.0661	0.1754	0.278	-0.3895	0.4253	0.5847	-0.2003	-0.0952	-0.1401	-0.0782	0.3055	-0.0837	-0.0636	-0.2681	0.3805	-0.2928	-0.1246	-0.083	0.2732	-0.0342	0.1798	0.2659	0.0177	-0.2033	0.4608	-0.5477
104131	0.0191	0.1772	-0.0461	-0.2556	-0.1181	0.4271	0.2597	-0.0101	0.1928	-0.2323	-0.2017	0.4894	0.01	0.1482	0.1339	0.2022	0.5423	-0.2949	0.0531	0.0814	0.0242	0.4928	0.2738	0.0832	-0.0293	0.2949	0.0986	0.6008	1.1809	0.1219	0.2933	0.1912	0.1465	0.158	-0.2514	0.0604	-0.0863	0.691	0.5569	0.0879	0.0234	0.6343	0.1788	0.1368	0.2097	0.4944	0.242	0.4716	0.0767
104140	0.0555	0.2323	0.6233	-0.3759	-0.2033	0.6475	0.3285	0.0341	-0.1109	-0.2376	0.1843	0.5681	0.1862	0.2359	0.162	0.0339	0.2907	-0.1952	0.3379	0.1047	0.1069	0.3227	0.369	0.3672	-0.026	0.3586	0.1808	0.3508	0.7485	0.2575	0.4999	0.1092	0.3534	0.0668	-0.1673	-0.0157	0.0218	0.8641	0.1622	-0.1076	0.0762	0.2674	-0.1678	0.4112	0.0899	0.4777	0.2846	0.3583	0.1274
104142	-0.0933	0.6991	0.6118	0.1794	0.0157	-0.9048	-0.3392	0.0881	0.1595	-0.5668	0.1627	0.1515	0.3803	-0.1648	0.0354	0.2193	-0.0012	0.8444	0.1345	-0.0036	0.3224	-0.248	-0.2236	-0.319	-0.2994	-1.0143	-0.2672	-0.4799	-0.5055	0.2737	-0.2519	-0.3016	-0.3729	0.002	0.3111	0.2479	-0.1237	-1.1172	-0.4245	0.1008	0.5293	-0.6541	-0.0826	-0.5869	0.0058	-0.7839	-0.5273	0.3489	-0.711
104157	-0.1015	-0.0527	-0.8429	-0.0469	0.0871	0.2437	-0.0465	0.2291	0.5072	0.0048	0.43	0.2575	0.2637	-0.1417	-0.1769	-0.2454	0.257	-0.8127	0.2182	0.0349	-0.2695	0.3821	0.3165	0.2435	-0.5193	0.2262	0.0337	0.3822	0.2973	0.118	0.2644	0.3686	0.5174	0.0202	0.2973	0.3487	0.0631	0.5483	0.5108	0.4044	-0.4027	0.1695	-0.1456	0.4207	0.1125	-0.0368	0.0964	0.2585	0.4852
104193	0.1523	-0.2292	-0.3663	0.2132	0.1338	0.0569	0.195	0.2812	-0.0659	0.5947	-0.1227	-0.031	0.3332	0.0857	0.47	0.0322	-0.2073	-0.1073	-0.2008	-0.2393	-0.1957	-0.1403	0.2661	-0.139	0.1231	0.3417	-0.2698	0.0286	-1.3016	-0.5088	0.2589	-0.1412	-0.1521	-0.2923	-0.0475	0.1667	0.23	-1.2141	0.4937	0.0456	-0.196	-0.0734	0.137	0.1535	-0.3774	-0.0148	0.2389	0.1379	0.1534
104196	-0.2326	1.2224	-0.645	-0.0422	-0.1004	1.282	-0.1917	0.4189	0.6065	0.4943	-0.0111	0.4365	-0.1456	-0.2568	-0.4376	-0.1223	-0.1354	-0.0281	-0.148	0.1802	-0.3292	-0.0023	-0.3091	-0.2139	-0.0658	-0.1949	-0.1729	0.9418	0.3687	-0.0662	1.2372	-0.0472	0.6962	-0.07	-0.0537	0.1666	-0.1337	0.2001	0.4165	0.2339	-0.0883	0.4828	-0.023	0.3365	-0.0748	0.0394	-0.3921	0.2534	-0.2092
104200	0.1205	0.0915	-0.5731	0.2694	0.1367	0.286	0.1815	0.2404	-0.448	0.4193	0.092	-0.0779	0.47	0.08	0.193	-0.2386	-0.0435	0.1363	0.3384	0.0316	0.123	0.1278	0.1709	-0.1414	0.3759	0.3658	0.2849	0.1735	-0.0525	-0.0625	-0.1091	0.3218	0.1477	-0.2917	-0.0826	-0.3568	0.1476	-0.4834	0.0667	-0.1659	-0.2979	0.1255	0.0952	0.0929	-0.1397	0.1994	0.312	0.1372	-0.2005
104213	0.1667	-0.4796	-0.3783	-0.139	0.0304	0.2772	0.2872	0.0574	0.0864	0.068	-0.2788	-0.3966	-0.0898	0.1237	0.3505	0.0317	0.4838	0.0223	0.1391	0.1098	0.0297	-0.0651	0.1186	0.3417	0.0332	0.3145	0.0751	0.0223	0.7708	-0.0314	-0.0795	0.0547	0.025	0.1115	-0.3943	-0.0157	0.3055	0.5882	-0.0166	-0.1953	-0.0471	0.401	0.0706	0.0055	0.1806	0.6647	0.2006	-0.1901	0.1155
104220	-0.1073	-0.039	0.3988	-0.3631	-0.451	-0.0817	-0.2687	-0.3034	-0.7043	-0.2721	-0.2672	-0.5676	0.0483	0.142	-0.1202	-0.1807	0.0756	-0.0902	-0.4097	0.1065	-0.4281	-0.3175	-0.1559	-0.0646	-0.0193	0.1553	-0.5804	-0.5899	0.123	-0.294	-0.0036	0.0027	-0.3415	-0.0071	0.0013	-0.6426	-0.3715	0.0989	-0.5781	-0.0431	-0.1573	0.0039	0.0844	-0.1693	0.3713	0.0401	0.1939	-0.1579	-0.3096
104225	0.1688	-0.5562	-0.0794	0.2065	-0.0441	0.0921	0.1295	0.0403	0.2897	0.1891	-0.3325	-0.1369	0.0858	-0.2273	0.029	-0.0802	0.19	-0.4122	0.4105	0.7237	-0.1593	0.2551	0.3905	0.1066	0.0762	0.8081	0.2537	-0.3165	-0.1954	-0.1795	0.1654	0.1319	0.0164	0.1806	0.0103	-0.4359	0.4118	0.5684	0.9837	0.1309	-0.0332	0.7889	0.0212	-0.2129	0.3252	0.3046	0.2022	-0.4217	0.2673
104245	-0.1144	-0.1871	-0.2019	0.1794	0.0289	0.314	0.1897	0.016	-0.1931	0.0555	0.3281	0.2907	0.0902	0.0892	0.1319	-0.0802	-0.1434	-0.2635	0.2098	-0.1713	-0.1795	0.3129	-0.0631	0.137	-0.102	0.3166	0.1946	0.2451	0.4364	0.13	0.0001	0.0633	0.2049	-0.0427	-0.073	0.3122	0.1603	0.4301	0.2904	-0.0596	-0.2916	0.0301	0.1806	0.3507	0.021	0.328	0.1777	0.1929	0.3223
104254	-0.2024	-0.0996	-0.1186	0.1727	0.3693	0.5947	0.2274	0.4541	-0.8995	0.1712	0.3837	0.2419	-0.2351	0.0976	0.5795	-0.0406	0.0163	-0.1776	0.4136	0.9026	0.298	0.6246	0.2621	0.1644	0.1392	0.3505	0.347	0.101	0.6939	0.4543	-0.2425	0.294	-0.2352	0.0987	-0.4859	-0.4568	0.3177	0.7074	0.0338	0.0537	-0.6696	0.3427	-0.0902	1.0426	-0.4529	0.5163	0.3007	-0.1639	0.3729
104260	-0.3707	-0.0888	-0.5525	-0.0156	-0.1474	0.2275	0.1413	0.6124	0.3787	0.6806	0.0658	0.2684	0.0967	-0.3214	-0.2327	-0.3055	-0.048	-0.0949	0.4302	0.1099	0.2812	-0.1993	-0.1877	-0.0413	-0.4228	0.219	0.0372	0.2161	0.144	-0.6509	-0.0105	-0.0313	0.1034	-0.1932	0.0763	-0.1566	0.3524	0.1898	0.4411	-0.0746	-0.3272	0.3124	-0.0648	0.0565	-0.2814	0.0117	0.0986	-0.1223	0.2574
104276	0.1428	-0.3476	-0.1914	-1.1953	0.7314	0.6462	-0.8622	0.3814	1.3153	0.2395	-1.0347	-1.2339	-0.3031	0.0587	0.1706	0.0646	-0.5435	0.177	-0.8826	0.2451	0.0451	0.1709	0.6028	-0.3481	0.1045	0.583	-0.5216	0.292	-0.3756	-0.5945	0.8957	0.1074	-0.0741	0.3906	-0.0378	-0.4696	-0.2577	-0.1039	-0.2148	-0.1485	0.8153	-0.7596	1.007	0.4952	0.3757	-0.5665	-0.6481	0.0342	0.0996
104280	-0.1941	0.2699	0.3076	-0.1442	-0.0588	-0.1045	-0.3212	-0.5663	-0.0281	-0.5622	0.0092	-0.2259	-0.2591	0.1808	-0.231	0.0191	0.0326	0.0946	-0.4997	-0.4769	0.0159	-0.1594	-0.0447	-0.0049	0.0325	-0.5078	0.093	-0.3827	-0.3507	0.4043	0.1933	0.1333	0.3155	-0.029	0.104	0.0131	-0.3405	-0.598	-0.3611	0.1302	0.1926	-0.4237	-0.1389	-0.193	0.0015	-0.3072	-0.1328	-0.0894	-0.3207
104292	0.5362	-0.6244	0.1176	0.4228	-0.2455	0.0056	0.3996	0.1015	-0.1947	0.6745	-0.1203	0.1212	-0.1269	-0.0993	0.6986	-0.0925	0.5461	-0.1283	0.0781	0.4789	-0.1174	-0.0008	-0.1954	-0.0212	0.1213	0.2127	-0.2389	0.284	0.5976	-0.4877	0.6361	-0.0589	-0.2607	0.334	-0.2328	-0.247	0.314	0.5463	0.0123	0.0976	-0.3047	0.274	0.1255	0.1671	0.2515	0.2349	-0.0942	-0.0237	0.2275
104293	0.7852	-0.3782	0.4761	-0.3412	-0.1374	0.1407	0.1854	-0.6391	-0.02	-0.0109	-0.241	0.0385	-0.2609	0.411	0.6482	0.0521	-0.4465	-0.5404	-0.5197	-0.1842	0.3105	0.2336	0.0406	0.7621	0.1151	0.4146	0.1101	-0.1951	0.5858	0.2052	0.1233	-0.0091	0.3183	0.098	-0.821	0.4957	-0.347	0.1494	-1.0165	-0.0193	0.3728	-0.2364	0.3282	0.229	0.5117	0.7379	-0.3717	-0.2156	0.6574
104309	-0.2218	0.1494	0.2992	0.205	-0.1651	-0.4461	0.0204	-0.3042	-0.4701	-0.5913	0.2469	-0.3619	0.1966	0.239	-0.0029	0.1184	-0.1843	0.1293	-0.2938	-0.1183	0.2896	0.0651	-0.2386	-0.0793	0.0957	-0.3071	0.0242	-0.2782	-0.566	0.6097	0.061	0.3931	-0.148	0.0945	0.3916	0.0699	-0.4227	-0.0753	-0.3266	0.2748	0.1147	-0.1457	-0.0006	-0.5292	-0.1919	-0.3354	0.1983	0.0362	-0.6521
104341	-0.3182	-0.3472	-0.6785	0.0949	-0.4144	0.2376	-0.3143	0.7289	0.4598	0.7762	-0.3004	0.0736	-0.1077	-0.3722	-0.1643	-0.2091	0.412	0.0272	0.4454	0.4469	-0.4528	-0.3285	-0.2649	-0.0422	-0.3644	0.1661	-0.5329	0.171	0.6455	-0.8129	-0.0618	-0.4926	0.2472	-0.4536	0.3296	-0.4296	0.7626	0.3598	0.6496	-0.5021	-0.3669	0.5413	-0.1384	-0.0166	-0.4505	-0.2824	-0.1061	-0.2463	0.2191
104346	-0.0309	0.1316	0.4469	0.0063	0.0968	-0.2032	-0.0348	-0.2902	-0.0776	0.4888	0.101	-0.1067	-0.0275	0.0869	-0.0756	-0.2593	-0.0479	0.0489	0.0938	-0.1723	0.2369	0.1595	-0.2384	-0.0204	-0.1642	-0.0918	-0.0892	-0.0379	0.2133	0.2896	0.0503	0.2809	-0.1493	0.4406	-0.063	0.4232	-0.4986	0.3496	-0.1027	0.1589	0.0829	0.0846	0.1096	-0.2357	-0.106	-0.0049	0.0085	-0.3963	-0.2302
104350	0.5445	-0.5582	0.0507	0.0805	0.0092	0.4306	0.019	0.088	0.1315	0.2322	0.1341	0.0857	-0.2346	0.0719	0.1783	-0.0269	-0.0638	-0.4523	-0.5909	-0.604	0.3264	0.0375	-0.0877	0.2537	0.2587	0.2981	-0.3544	-0.2976	0.5986	0.2831	0.1203	-0.0794	0.0223	-0.0834	-0.4205	-0.0169	-0.4167	0.5079	-0.3114	-0.1996	-0.3794	0.1989	0.1706	0.411	0.4391	0.4636	-0.2087	-0.2377	0.4341
104360	-0.8798	0.0251	-0.5551	0.2098	0.6253	-0.2327	-0.3898	-0.5258	0.4346	-0.5804	-0.0007	0.6915	-0.1083	-0.6971	-0.5146	0.0895	-0.3871	-0.292	-0.4824	0.3004	-0.1171	0.2263	-0.405	-0.6455	-0.245	0.4997	0.2298	1.4431	0.2856	0.4504	-0.7506	0.6426	0.4227	0.646	-0.1879	0.6698	-0.0204	0.3977	0.3528	0.3277	0.6048	0.5086	0.4807	0.4254	-0.0832	0.6904	-0.1061	-0.0658	-0.0092
104372	0.3828	0.0957	0.0524	0.1415	0.0922	0.2892	0.4693	0.2174	0.251	0.1335	0.1662	0.3541	0.0028	0.1265	0.3452	0.0914	0.238	-0.1103	0.2191	-0.0575	0.3445	0.2349	0.0627	0.1443	0.3462	0.246	0.094	0.4618	0.5691	0.3131	0.1384	0.084	0.2011	0.1448	-0.0381	0.3075	0.2407	0.4992	0.1587	0.1088	0.0072	0.4644	0.1828	0.3689	0.2346	0.6237	0.0753	0.2251	0.464
104377	-0.1322	-0.3157	-0.1945	0.3469	0.1102	0.3425	0.0553	0.0836	-0.7032	0.3828	0.1674	0.1078	0.2211	-0.0953	0.2177	-0.0152	0.5819	-0.1335	0.3421	0.0119	-0.1776	0.2231	0.1039	0.2161	0.1368	0.4744	0.2931	0.2075	0.7027	0.0379	-0.1828	0.2501	0.5202	0.1837	0.1647	-0.0837	0.0835	0.4905	0.4704	-0.0866	-0.1802	0.119	-0.0374	0.2835	-0.3943	0.2425	0.4082	0.3225	0.4387
104384	1.0366	0.641	0.5011	-0.9832	0.453	0.545	-0.1721	0.1519	0.2776	0.756	-0.185	-0.1672	-0.9176	0.0594	0.4593	0.473	-0.0904	0.2019	0.5084	-0.3023	0.0862	-0.0939	0.3489	0.1955	0.2937	0.1956	0.2448	-0.0828	1.1108	-0.1059	-1.1913	0.1533	0.5754	-1.0402	-1.274	0.4837	0.5334	0.25	0.6151	0.1536	-0.518	-0.3432	-0.9966	0.4561	0.2834	-0.1803	0.1011	0.0626	-0.185
104387	0.9416	-0.2146	-0.1535	-0.0682	-0.1988	-0.1823	0.4708	-0.7238	-0.6664	-0.2772	-0.3298	-0.328	-0.2498	0.3384	0.6317	0.0646	0.1434	-0.3911	-0.084	-0.0483	-0.0033	0.2414	0.4434	0.2443	0.6271	0.3918	0.2277	-0.1085	0.6537	-0.0325	0.0446	-0.3442	0.091	0.2045	-0.2336	0.3059	-0.0728	0.461	0.0392	-0.0918	-0.3044	-0.0517	-0.0947	0.6339	0.2906	0.5716	-0.26	0.0267	0.0673
104402	-0.2234	-0.0951	0.1402	0.1118	0.4642	0.6846	0.6249	0.5237	-0.0993	0.4581	-0.6375	0.1064	0.2185	-0.017	0.4134	0.1242	0.2389	-0.0282	0.6687	-0.1367	0.138	0.6222	0.4804	-0.4789	0.499	1.2109	0.1573	0.9415	0.3954	0.1849	0.4477	0.5784	0.0168	-0.2033	-0.3064	-0.2688	0.4363	0.0023	0.1795	0.5246	0.0554	0.736	0.5303	0.8321	-0.1431	1.126	0.6846	0.0887	-0.1224
104409	-0.4721	-0.7182	-0.936	0.3455	0.0509	0.5151	0.2098	1.0186	0.1066	0.6485	-0.0535	-0.1129	-0.0585	-0.2993	0.1162	-0.4747	-0.2743	0.2904	0.5213	-0.1995	-0.6295	-0.6494	-0.2309	-0.4617	-0.2114	0.0629	-0.1936	-0.2065	-1.7828	-0.3788	-0.6787	-0.3022	-0.3787	-0.6709	0.2582	-0.594	0.906	-0.6431	0.3943	-0.525	-0.4669	0.142	0.0067	0.1769	-0.568	0.2314	0.1675	-0.2743	0.0886
104427	0.2372	-0.1315	-0.3669	-0.2162	0.1337	0.5146	0.232	1.3573	0.7524	1.1452	0.0328	0.1699	0.2612	-0.0181	0.0442	-0.1439	-0.0989	0.6735	0.3027	0.6292	-0.2701	-0.2867	0.1262	-0.2203	-0.1678	-0.1464	-0.3308	0.6312	0.4611	-0.5701	0.1661	-0.4552	-0.2343	-0.2479	-0.0728	-0.1175	0.3381	0.3475	0.2339	-0.1309	-0.3183	0.6052	0.6877	0.3587	-0.0201	0.0514	-0.0689	0.312	0.1718
104431	-0.2314	0.0642	-0.2373	0.1759	-0.3085	0.2847	-0.0217	0.0031	0.1188	0.0571	-0.1203	0.0694	0.0133	-0.1148	-0.2435	0.2747	1.2756	-0.9917	0.1394	0.0397	-0.4015	0.1234	-0.1727	0.0021	-0.1912	0.1129	0.1434	0.0647	0.4318	-0.1905	0.0962	0.0174	0.5038	-0.0246	-0.0232	0.295	-0.082	0.7253	0.495	-0.2019	-0.2702	0.4335	-0.1783	-0.0551	-0.5208	0.1293	0.2153	-0.1405	0.4975
104456	-0.4512	-0.4188	-0.9158	0.3771	-0.2415	0.3056	0.0599	0.8473	-0.0832	0.7776	-0.2095	-0.5483	-0.255	-0.4366	0.0749	-0.5031	0.0508	0.0372	0.8396	0.0724	-0.544	-0.447	-0.5615	-0.1628	-0.2956	0.2694	-0.2744	0.1983	0.0457	-0.1588	-0.5093	-0.2303	-0.1131	-0.543	0.3471	-0.4993	0.6124	0.3662	0.1902	-0.3497	-0.4873	0.6664	-0.1005	-0.0613	-0.8504	-0.3006	0.0916	-0.4501	0.1194
104477	-0.4164	0.8723	0.2437	0.2556	-0.1114	-0.7955	-0.3631	-0.3629	-0.3113	-0.5819	0.1449	0.0762	0.2976	-0.1724	-0.0757	0.205	-0.1471	0.1754	-0.2257	0.0639	0.5186	-0.1186	0.0841	-0.1019	-0.1963	-0.67	0.3367	0.0857	-0.531	0.6496	-0.0355	0.144	-0.0497	0.4534	0.1258	0.2909	-0.248	-0.6701	-1.1908	0.159	0.4654	-0.9417	0.0429	0.069	-0.0918	-1.2731	-0.0466	0.1803	-0.656
104483	-0.0019	-0.3109	-0.379	0.0021	-0.077	0.5985	0.2012	0.5618	0.1545	0.4003	0.0642	0.0341	0.0599	-0.0597	-0.0304	-0.1346	0.2272	0.7364	0.4295	-0.153	-0.194	-0.0699	0.018	-0.0924	0.1114	0.1848	0.0569	0.2285	0.2811	-0.2592	-0.1784	-0.0162	0.0458	-0.0378	0.066	-0.325	0.2796	0.3662	0.3115	-0.1096	-0.4119	0.3571	0.0981	0.1502	-0.0021	0.3588	0.0423	-0.0426	-0.0028
104490	-0.4872	-1.1023	-0.8421	0.5065	-0.0523	-0.3079	-0.2574	-0.7337	-0.0886	-0.2238	0.2333	0.2893	-0.1327	-0.0377	-0.654	-0.2656	0.355	-0.4811	0.0934	0.6049	-0.7443	0.2431	0.0622	0.638	-0.3792	0.8222	0.6707	0.4749	0.779	-0.7644	0.2558	0.0375	0.3654	0.6976	0.3559	0.4202	0.4537	0.7965	1.287	-0.2067	-0.7168	0.4295	-0.3031	-0.0126	-0.4484	-0.2407	1.0744	-0.4396	0.9726
104504	-0.1926	-0.6902	0.3774	-0.5985	-0.0775	-0.0384	-0.2998	-0.5807	0.0761	-0.146	-0.5189	-0.1212	-0.4247	0.3337	0.2111	-0.302	0.0829	-0.5259	-0.5537	-0.3409	0.3036	0.2316	0.0005	0.2022	0.0311	0.3222	0.0566	0.3947	0.9021	0.1443	0.4778	-0.2296	0.0216	-0.0168	-0.4322	0.6813	-0.5623	0.0148	-0.4033	-0.0126	-0.0351	-0.1475	-0.0586	0.2294	0.4373	-0.1283	-0.3921	-0.2271	0.9177
104539	0.0985	-0.6025	0.5486	-0.2283	0.061	0.4123	-0.7725	0.028	0.2227	-0.18	0.3843	-0.5033	0.0423	-0.144	-0.7713	0.2262	0.5393	-0.1631	-0.4652	1.1476	0.2436	0.0619	0.0157	0.0126	0.5445	0.219	0.5997	-0.2173	-0.1271	0.333	0.7049	0.0378	-0.0943	0.1381	0.4396	0.323	-0.1458	-0.0185	-0.2333	0.0768	-0.1074	0.0594	-0.1119	0.3265	-0.3005	-0.5236	-0.2896	0.0564	0.5651
104547	0.3189	-0.2574	-0.0022	-0.236	0.0721	0.299	-0.083	-0.0649	-0.2095	-0.1643	-0.0108	-0.0557	-0.4342	0.0434	-0.1047	0.0015	-0.0299	-0.1973	-0.1397	-0.5684	-0.1281	0.1349	-0.1054	0.1302	0.1938	-0.0434	-0.0812	0.2329	0.1084	0.1825	0.2072	0.1016	0.0034	0.0724	-0.3848	0.0347	-0.2015	0.2663	-0.3102	-0.0297	-0.019	-0.266	-0.0439	0.3456	0.1225	0.5613	-0.4823	-0.2567	-0.0215
104562	-0.208	-0.2921	-0.1275	0.0205	-0.2341	0.0945	0.0232	-0.2247	0.0972	0.0986	0.0635	0.2083	0.175	-0.0425	-0.0786	-0.1987	0.0996	-0.3085	0.0235	-0.0747	-0.162	0.1548	-0.1217	0.1454	-0.3122	0.0925	0.0077	0.3026	0.6788	0.0394	0.0912	0.1522	0.2679	0.1151	0.0685	0.1302	-0.0033	0.3389	0.229	0.0084	-0.1246	0.0663	-0.2239	0.2288	-0.1567	0.0693	0.1437	0.0555	0.4568
104564	-0.2053	0.3571	-0.0933	0.0418	-0.05	0.2352	-0.0765	-0.1943	-0.0821	-0.0913	0.2365	0.4448	0.0192	-0.0018	0.1093	-0.141	0.0268	-0.0588	0.1702	-0.0994	0.0046	0.2715	-0.0817	-0.0559	0.0597	0.1976	0.1918	0.3138	0.5533	-0.0249	-0.0974	0.0586	0.0528	0.1013	0.042	-0.0307	0.0207	0.3874	0.5564	-0.1478	-0.0254	0.3498	-0.1552	0.1666	-0.0779	0.0663	0.1643	0.0969	0.2654
104566	-0.1778	0.1554	-0.1259	-0.1419	-0.1556	0.3289	0.0943	0.0745	0.1319	0.0992	0.0331	0.2972	-0.1424	-0.201	0.0715	-0.0842	0.1972	-0.0884	0.3678	0.1463	-0.1141	0.1384	-0.1381	-0.0578	0.0616	-0.0569	0.1628	0.5851	0.6986	-0.2245	-0.1415	-0.0585	-0.0364	0.0621	-0.0237	0.0404	-0.0782	0.4905	0.3801	0.0663	-0.1875	0.5931	0.1586	0.2505	-0.1207	0.1685	0.0071	0.189	0.3534
104569	-0.1356	-0.1106	-0.4752	0.1356	-0.0465	0.1667	0.1931	0.034	-0.3695	-0.093	0.2215	0.2944	0.1587	0.0681	0.0508	-0.3149	-0.2629	-0.0505	0.4289	-0.0256	0.0199	0.1301	-0.1606	-0.0831	-0.2965	0.341	0.2326	0.4728	0.5046	0.0425	-0.321	-0.1906	-0.1176	-0.0472	-0.1845	-0.457	0.0892	0.7656	0.3527	-0.1851	-0.044	0.5195	-0.1181	0.1053	-0.2512	0.5831	0.388	-0.0395	0.1767
104594	0.0459	-0.3303	-1.4461	0.0143	0.236	0.2137	0.0461	2.0275	0.8815	1.9321	-0.3301	-0.1109	-0.0632	-0.2898	0.631	-0.2162	0.4066	1.0685	1.2641	1.1123	-0.0591	-0.9794	-0.2745	-0.3908	-0.5159	0.2815	-1.4791	0.3044	0.3734	-1.6969	-0.4977	-1.367	-0.855	-0.963	0.105	-0.7143	1.2076	0.4386	0.5835	-0.7215	-0.2188	0.9678	0.835	0.4008	-1.1802	-0.6148	0.015	-0.3632	-0.1737
104610	0.0679	-1.25	-0.1849	-0.7369	0.1985	0.2635	-0.4904	-0.1698	0.1048	0.2771	-0.652	0.0311	-0.4882	-0.7486	0.1227	-0.1156	0.4849	-0.2304	0.0533	-0.3804	-0.0773	-0.4221	-0.8317	0.3497	-0.167	-0.1669	-0.7523	0.0415	0.8046	-0.1701	0.4234	0.1701	-0.2897	-0.128	0.0447	0.2292	-0.2699	0.6607	0.0027	-1.139	1.1261	-0.0628	-0.0986	0.0132	-0.1743	-0.3637	-0.3049	-0.5363	0.9464
104619	0.0586	0.3835	0.5953	-0.502	-0.1828	0.0858	0.177	-0.2148	-0.4144	-0.0888	0.3385	-0.1641	0.2458	-0.2126	-0.1916	-0.0084	-0.5529	-0.0152	-0.2839	-0.1137	0.0672	-0.2443	0.0076	-0.4297	0.6648	-0.5693	0.2813	-0.4294	-0.6257	0.2432	-0.3594	0.0666	-0.508	-0.2933	-0.0076	0.4058	-0.1466	-0.0966	-0.7358	0.2215	-0.1068	-0.5121	0.0358	-0.2877	0.1108	-0.4167	0.4341	0.2375	-0.1858
104625	-1.5455	-0.4201	-2.4988	-2.0123	0.6842	0.7526	-1.8425	0.3354	-0.2525	0.368	0.9119	-1.8179	-1.9506	-1.7751	0.7977	0.5021	0.0458	0.9652	1.2598	0.0519	0.0166	-0.3279	-0.026	0.605	-2.289	0.5554	-0.0299	0.0724	0.4698	-1.9728	-1.4344	-1.6889	0.3365	0.0147	-1.5022	-2.1836	0.9562	0.2571	0.6123	-0.263	0.2367	0.8933	0.3176	-1.7764	-0.3674	-1.8269	0.8676	-0.0161	0.6415
104627	0.2992	0.1645	-0.5263	0.0423	0.2101	0.4585	0.3428	0.788	0.1492	0.6425	0.3554	-0.1067	0.561	-0.0372	0.2323	-0.4536	-0.0612	0.6096	0.5518	0.3834	0.2281	-0.0111	0.1579	-0.1183	0.2403	0.573	-0.1427	0.1494	-0.1477	-0.4908	0.2393	-0.575	-0.2245	-0.4178	-0.0417	-0.5772	0.6843	0.3283	0.1026	-0.0127	-0.2021	0.389	0.3769	0.5271	0.0708	0.4474	0.1346	0.8295	-0.2364
104638	0.4496	0.2229	-0.1689	0.2315	0.1592	0.3575	0.5377	0.1245	0.0946	0.286	-0.1017	0.0409	0.0439	-0.252	0.467	0.1329	0.061	-0.2022	0.3706	0.1915	0.0836	0.1753	0.4103	-0.0986	0.5085	0.2113	0.032	0.2902	0.7035	-0.2736	0.4417	-0.0485	0.1194	-0.0858	-0.3326	-0.2052	0.3926	0.6622	0.3007	0.1542	-0.0542	0.292	0.1629	0.7419	0.415	0.5649	0.2206	0.0964	0.5738
104651	0.6211	-0.1953	-0.2473	-0.3444	-0.0472	-0.0071	0.3599	-0.4685	0.2789	-0.1911	-0.0396	-0.1806	-0.1137	0.2891	0.1362	0.063	0.3947	-0.3615	-0.0624	-0.2726	-0.4445	0.6542	0.3361	0.1145	0.3774	0.7551	0.0437	0.2234	0.8111	0.1425	0.1806	0.0298	-0.1538	-0.0537	-0.4651	0.1854	-0.3556	0.0979	0.2151	0.1462	-0.2151	-0.434	0.3683	-0.3811	-0.0107	0.6375	0.1212	0.0776	0.2349
104683	0.1829	0.0123	-0.3724	0.0696	0.0098	0.3997	0.1663	0.5073	0.1956	0.6596	-0.3371	0.3179	-0.1429	-0.1003	0.2507	-0.0067	0.4069	-0.0731	0.451	0.1753	-0.0055	0.1094	-0.338	-0.1018	-0.0004	0.3573	0.0203	0.5552	0.6066	-0.3626	-0.0316	-0.2674	0.1245	-0.1781	-0.2295	-0.0406	0.3178	0.6904	0.6208	-0.0772	-0.3378	0.6031	-0.068	0.422	-0.1326	0.5009	-0.0119	0.1818	0.4663
104690	0.6398	-0.1178	0.0157	-0.1129	-0.0078	0.5591	0.6745	0.3348	0.0883	0.2873	-0.0878	-0.0315	-0.1503	0.4029	0.8185	0.1503	0.4718	-0.1886	0.4016	0.3713	0.3389	0.4557	0.0941	0.1491	0.5568	0.3752	0.1332	0.164	1.0165	-0.2399	-0.0621	-0.0703	-0.1528	-0.4968	-0.6586	-0.4603	0.3756	0.8436	0.2646	0.1489	-0.275	0.2692	0.1747	0.254	0.4368	0.7912	0.1958	0.2602	0.3251
104697	-0.0921	0.7365	0.5185	-0.2905	0.0758	-0.3457	-0.6907	0.674	0.2777	0.2031	-0.6893	0.2024	-0.2175	-0.1354	-0.2453	0.092	0.4669	-0.1662	0.1386	-0.4971	-0.15	-0.2453	-0.5206	-0.4582	-0.672	-1.4409	-0.1855	0.29	0.3012	-0.1599	-0.4855	-0.1332	0.1566	0.0501	-0.0115	0.0908	0.4572	-0.6037	0.4268	-0.583	0.1783	-0.2766	-0.6392	-0.327	0.0285	-0.7825	-0.6603	0.2269	-0.0222
104723	-0.0682	-0.2182	0.1766	0.1243	0.112	-0.0789	-0.0491	-0.875	-0.1031	-0.331	0.254	0.024	-0.0122	-0.1446	-0.2823	-0.3275	0.054	-0.1078	-0.1546	-0.6032	-0.2238	-0.0603	-0.1096	-0.4151	0.077	-0.1815	0.0582	0.0008	0.1068	0.3753	0.2198	0.1806	-0.0586	0.3194	0.1097	-0.0171	-0.2727	0.1924	-0.3362	0.1505	0.2901	0.078	-0.1988	-0.0561	0.1104	0.1686	-0.1704	0.0988	0.0577
104728	-0.5942	0.8991	0.6324	0.3527	0.3941	-0.9592	-0.3612	-0.3072	-0.2477	-0.8992	0.1427	0.0604	0.3768	-0.2693	-0.2848	0.193	0.0612	0.1093	-0.2676	-0.2093	0.3316	-0.0111	-0.1151	-0.4063	0.068	-0.9233	0.1041	-0.0604	-1.1445	0.5676	-0.3479	0.2688	0.059	0.3843	0.5001	0.2137	-0.0667	-1.1186	-0.3312	0.1733	0.8096	-1.0358	0.029	-0.4582	0.1018	-0.722	-0.1533	0.4273	-1.0942
104731	-0.2342	-0.3681	-0.2572	0.3275	-0.0394	0.1329	0.2425	0.4356	-0.2099	0.1982	0.0375	-0.1364	0.1202	-0.0308	0.3323	-0.2428	0.0194	-0.1129	0.2907	-0.1306	-0.204	-0.0557	-0.0818	-0.1788	-0.0231	0.1347	-0.0328	0.0131	0.0875	0.0665	-0.1876	-0.1288	0.1224	-0.4284	0.072	-0.3674	0.4968	0.1256	0.2665	-0.0906	-0.4459	0.1224	0.0767	0.0854	-0.1941	-0.1491	0.3296	-0.0279	0.0068
104739	0.1623	-0.1442	0.7078	-0.2857	0.0661	-0.4318	-0.373	-0.4564	-0.2206	-0.5494	0.0015	-0.3276	0.0485	0.5186	0.0432	0.2822	-0.1829	0.0054	-0.4862	-0.1077	0.1335	0.1807	0.2103	0.2901	0.3922	0.1051	0.2548	-0.794	-1.3355	0.2603	0.5993	0.1643	0.0592	-0.0604	0.1224	-0.0643	-0.339	-0.4061	-0.373	0.2305	0.3136	-0.677	0.2654	-0.1141	0.2032	0.0696	0.0465	-0.085	-0.5087
104741	-0.2291	-0.1313	0.3075	-0.1825	0.0161	0.0707	-0.015	0.1273	-0.036	-0.0207	0.4144	0.2904	0.2441	-0.1033	-0.1966	0.0951	-0.5258	0.063	-0.1798	0.2171	0.279	-0.0202	0.2989	-0.0732	-0.3869	0.0647	0.0592	0.0662	-0.0496	0.0355	-0.0765	0.1364	-0.0689	0.1565	-0.0161	-0.3151	-0.3233	0.0312	-0.4642	0.2054	0.1983	0.126	0.1097	0.1272	0.4575	-0.0764	-0.2113	-0.1406	0.4084
104742	0.2011	0.4767	-0.1062	-0.1775	-0.7311	0.2607	0.2272	0.2068	-0.0842	-0.4706	0.0963	0.4891	0.5018	-0.0217	-0.3241	-0.1991	-0.2228	0.2704	-0.1503	-0.7046	-0.0097	0.2747	0.3699	0.3812	0.1187	0.1119	0.1876	0.3306	0.919	0.3127	0.1743	0.6854	0.1801	0.1822	-0.3114	0.285	-0.0269	0.4114	-0.0155	0.2286	0.0423	0.317	-0.0632	0.3601	0.0182	0.3891	0.0411	0.0945	0.1382
104743	0.644	-0.4662	0.3027	-0.2229	-0.1065	0.4012	0.4018	-0.1975	-0.1016	-0.2802	-0.2245	-0.114	-0.2376	0.1543	0.0976	0.1842	-0.1424	-0.179	-0.0712	0.4165	0.1066	0.1452	0.3067	0.1244	0.36	0.3733	0.1329	-0.2405	0.1106	-0.035	0.3622	0.015	-0.2621	0.0756	-0.6417	-0.2889	-0.0024	0.5903	-0.1668	0.0269	-0.0848	0.2015	0.1702	0.4027	0.3656	0.6454	0.0076	-0.2008	0.3997
104748	-0.315	0.6778	0.6694	0.1474	0.1817	-0.773	-0.3646	-0.3822	-0.1355	-0.6973	0.136	-0.0402	0.0833	-0.2623	-0.3569	0.2717	-0.0182	0.1788	-0.1773	0.0168	0.1767	-0.0655	-0.3452	-0.1679	-0.1343	-0.7794	0.0385	-0.2957	-0.3594	0.5251	-0.2505	-0.081	-0.1153	0.2493	0.4281	0.4683	-0.3457	-1.042	-0.8256	-0.026	0.6627	-0.8484	-0.2594	-0.5826	0.2187	-0.9981	-0.3884	0.3945	-0.5852
104750	0.7573	-0.1783	0.4346	-0.0976	0.0274	0.0569	0.4541	0.0265	-0.1733	0.5446	-0.4362	-0.0056	-0.0625	0.3631	0.7058	0.2673	0.3043	-0.4238	-0.1489	-0.2293	0.3993	0.3964	0.2469	0.1178	0.429	0.2347	0.0918	0.0274	1.1044	0.1532	-0.0982	-0.198	-0.1246	0.0593	-0.6726	0.1941	0.0409	0.6893	-0.1177	0.2398	-0.1469	0.1226	0.0205	0.2834	0.5922	0.5058	-0.1934	0.0621	-0.0986
104764	0.0154	0.491	0.0475	0.0519	-0.7108	0.1926	-0.1526	-0.436	0.1118	-0.18	0.0078	0.2066	-0.0948	-0.1212	0.3491	-0.5428	0.3571	-0.1448	-0.2323	-0.1737	-0.0976	0.0995	-0.0841	-0.2208	-0.403	-0.0242	-0.048	0.1897	0.2401	0.0594	0.1704	-0.0868	0.1815	0.388	-0.0809	0.4115	0.1066	0.3666	-0.0284	-0.2333	0.0128	0.0982	-0.1225	-0.1722	0.0896	-0.4066	-0.3983	-0.0224	0.192
104772	-0.2092	-0.1782	-0.1951	0.0907	0.1266	0.0918	0.1462	-0.1744	-0.1135	-0.13	0.5218	0.2276	-0.0367	-0.01	0.1702	0.0683	-0.1807	0.2948	0.3002	-0.0464	0.0676	-0.089	-0.1308	0.1199	-0.1315	0.0519	0.0258	-0.1144	0.1333	0.1687	-0.3627	0.0295	0.0545	0.0432	0.0347	-0.1415	0.044	0.3413	-0.445	-0.0622	-0.1006	-0.1147	0.0459	0.06	0.0377	0.0674	0.0029	-0.2006	0.0916
104782	0.0441	-0.1426	-0.5129	0.2008	0.0392	0.3718	0.2658	0.2585	-0.0418	0.2382	0.1001	-0.0068	0.028	-0.0306	-0.0621	-0.0861	-0.1667	0.0986	0.5456	0.2431	-0.3653	0.0051	-0.1455	-0.0577	-0.2284	0.2533	0.2267	-0.0056	0.0916	-0.1214	0.029	0.0227	0.0081	-0.2184	0.2484	-0.1492	0.2942	0.4916	0.2959	-0.2026	-0.5312	0.1949	0.0362	0.1158	-0.2577	-0.0518	0.3368	-0.1362	0.0527
104861	0.079	-0.007	-0.3221	-0.1546	-0.3525	0.3566	0.0692	0.288	0.2799	0.1805	-0.046	-0.1435	-0.1608	0.0043	-0.3022	-0.2389	-0.1772	-0.1131	-0.0409	0.2023	-0.2183	-0.1578	-0.1716	-0.116	-0.0159	0.0851	-0.0224	0.158	-0.2108	-0.3298	0.1379	0.0209	-0.108	-0.1425	-0.0353	-0.0175	0.116	0.0059	0.1625	-0.1439	-0.1377	0.1585	0.2087	0.1777	-0.0707	0.1886	-0.0619	-0.1366	0.0687
104873	0.9568	0.1871	-0.1643	0.1871	0.4829	0.5938	1.1358	1.1373	0.0411	0.5383	-0.4017	-0.1196	0.2252	0.1363	0.8391	0.3488	0.4203	0.6248	0.8822	-0.3961	0.5457	0.3693	0.3989	-0.1208	0.7854	0.4706	0.1619	0.0728	-0.5817	0.0175	-0.4385	-0.1629	-0.5546	-0.4632	-0.6293	-0.2871	0.4268	0.6928	0.3586	0.0257	-0.2548	0.3269	0.3685	0.6243	0.329	1.2291	0.3574	0.2765	-0.3618
104890	-0.2146	-0.4093	-0.4401	0.0492	0.3421	0.4433	0.1911	0.5477	-0.042	0.1854	0.4064	0.0575	-0.2121	0.1161	0.1985	0.1597	0.2203	0.2422	0.2243	-0.0835	0.1663	-0.1305	0.4304	-0.0216	0.3341	0.112	0.3664	-0.2285	0.0632	-0.2788	0.0376	0.2803	0.1848	-0.1016	0.2018	-0.8659	-0.0722	0.5302	0.3592	0.5541	-0.2672	0.5381	-0.063	-0.0552	-0.1491	0.3053	-0.0516	-0.5684	-0.4215
104901	0.1513	-0.1446	0.5353	-0.0314	0.0707	-0.3694	0.121	-0.4926	-0.3754	-0.3175	0.3605	-0.476	0.7016	0.4146	-0.147	-0.2745	-0.3883	-0.2521	-0.3698	-0.3333	-0.0405	0.3849	0.5528	0.3725	0.2511	0.6011	0.3022	-0.6711	-1.4606	0.1267	0.6953	0.3206	0.1631	0.0124	0.1809	-0.0143	-0.2313	-0.2169	-0.2476	0.444	0.0031	-0.5161	0.3532	0.3058	-0.0669	-0.2907	0.5939	-0.2083	-0.1539
104921	-0.1045	0.6614	0.3001	0.1745	-0.3717	-0.3281	-0.2345	0.0316	-0.0761	-0.4191	-0.0433	0.0262	-0.2753	-0.248	-0.3735	0.1763	0.2216	0.1541	-0.1879	-0.3807	0.122	-0.2635	-0.0339	-0.2894	-0.1016	-0.3293	0.0984	-0.0786	-0.622	0.2694	-0.1343	-0.224	-0.1972	0.2537	0.2608	0.141	0.0503	-1.0389	-0.4637	0.1523	0.2405	-0.8208	-0.339	-0.1072	0.25	-0.7799	-0.1715	0.1038	-0.28
104925	0.2642	-0.4419	0.4882	-0.2786	-0.0516	0.4177	0.009	-0.3334	-0.076	-0.5004	0.1875	0.0249	-0.0845	0.2538	-0.0205	-0.1858	-0.4132	-0.0687	-0.6022	-0.1183	0.0492	0.2142	0.3466	0.68	0.0801	0.0676	0.053	-0.1372	-0.0423	0.2877	0.6639	0.2915	0.1946	0.2719	-0.5056	0.3853	-0.3828	0.1437	-1.0959	0.1205	0.1323	-0.1256	0.0888	0.2232	0.5035	0.1616	-0.2063	0.0378	0.1781
104934	-0.0716	0.6569	0.7036	0.1472	0.0457	-0.7885	-0.4432	-0.414	-0.0034	-0.5865	-0.0367	-0.0787	0.0119	-0.2087	-0.2767	0.1485	0.0877	0.0281	-0.1757	-0.2083	0.1557	-0.1084	-0.2227	-0.0518	-0.0372	-0.7364	0.0597	-0.2763	0.0157	0.4938	-0.306	-0.0373	-0.1375	0.4065	0.3636	0.2573	-0.3832	-0.924	-0.6137	-0.0484	0.6765	-0.6863	-0.3304	-0.5454	-0.0633	-0.8125	-0.3492	0.3099	-0.6424
104945	-0.2465	0.2779	0.3534	0.2839	-0.0894	-0.0347	-0.2207	-0.2861	0.115	-0.8551	0.3372	0.4898	-0.1029	-0.209	-0.2584	0.0182	-0.1512	0.3337	-0.1926	-0.1599	0.3326	-0.2869	0.0492	-0.0584	-0.1863	0.2612	0.0671	0.0634	-0.5825	-0.1614	-0.2694	-0.3294	-0.2603	0.0103	-0.0721	-0.0639	0.1369	-0.1917	-0.8391	-0.3644	0.1376	-0.4848	0.1494	-0.0361	-0.0663	-0.2409	-0.1684	0.0895	-0.0719
104948	-0.1371	0.827	0.7767	0.1998	-0.0975	-0.6319	-0.4178	-0.6192	0.1102	-1.3051	0.3719	0.3755	0.1101	-0.1376	-0.2945	0.2304	-0.2672	0.4235	-0.3393	-0.6642	0.259	-0.2435	-0.1924	-0.3131	-0.351	-0.7529	0.0199	-0.0849	-0.3095	0.6139	-0.2357	0.0123	0.2667	0.1355	0.2892	0.1344	0.1577	-1.0427	-0.8446	0.0575	0.6287	-1.0425	-0.0776	-0.1494	-0.1671	-1.1826	-0.2245	0.3299	-0.5576
104959	-0.0679	0.4797	1.0256	0.1317	0.0525	-0.7574	-0.4687	-0.3123	0.3746	-0.14	-0.0652	-0.5084	-0.0543	-0.2524	-0.252	-0.0275	0.2707	-0.2716	0.326	0.1059	-0.1369	0.1453	-0.2776	-0.0258	0.037	-0.3104	-0.188	-0.0404	1.0344	0.4207	-0.0352	0.0521	-0.3287	0.1788	0.0453	0.3747	-0.5985	0.1651	-0.2025	-0.0453	0.1811	0.0753	-0.0832	-0.2063	-0.0748	-0.3071	-0.1448	0.0327	0.1585
104988	0.3788	0.0248	-0.2938	-0.0256	0.2322	0.0164	0.0807	0.182	-0.0061	0.0968	0.1302	0.0692	0.0666	-0.0553	-0.1441	-0.0558	-0.1484	0.2241	0.0733	0.3669	-0.0452	0.1847	0.0404	0.0749	0.1023	-0.0155	0.0759	-0.0306	-0.1295	-0.2847	-0.3911	-0.1841	-0.194	-0.3839	-0.0208	-0.163	0.1117	0.2436	0.2513	-0.0494	0.0099	0.1793	0.2018	0.1714	0.4239	0.442	0.1	0.0375	-0.1221
105030	0.0173	-0.1985	-0.2229	0.1931	-0.2146	0.1137	0.1538	0.3225	0.0903	0.3789	-0.3177	-0.0098	-0.2013	0.1248	0.1809	-0.1133	0.0731	0.3328	0.463	0.3889	0.2433	-0.1136	-0.175	-0.1616	0.2128	0.4937	-0.0137	0.4222	0.3748	-0.3471	-0.1043	-0.0023	0.0984	-0.3439	-0.1623	-0.3881	0.3911	0.5077	0.5734	-0.0678	-0.3457	0.5958	-0.0416	0.4176	-0.2775	0.6893	0.0661	0.0555	-0.0718
105040	-0.4233	-0.2213	-0.3357	0.0718	-0.2227	-0.0335	-0.0673	-0.4479	-0.116	0.1239	-0.007	0.0404	0.1496	0.1642	-0.0737	-0.0399	0.2093	-0.2424	-0.2914	0.1715	0.1414	0.4194	0.0251	0.1829	0.0132	0.4638	0.1391	0.5482	0.8744	-0.1118	0.3806	0.1226	0.3627	0.1617	-0.102	0.1993	0.0477	0.6057	0.2726	-0.003	-0.342	0.4036	0.1436	0.5426	0.1541	0.3236	0.213	0.0581	0.5542
105056	-0.1618	-0.1088	-0.4492	0.3088	-0.003	0.2435	0.1789	0.336	-0.4832	-0.1102	0.0455	-0.1153	0.068	0.0342	0.0197	-0.3975	-0.3735	0.0334	0.4324	0.2771	-0.1056	-0.1564	0.0007	0.0821	-0.1152	0.7544	0.1826	0.1624	-0.038	-0.4024	-0.1733	-0.0101	-0.1012	-0.2327	-0.1028	-0.3052	0.3423	0.4802	0.3155	-0.2129	-0.3062	0.5576	0.0041	0.2168	-0.5054	0.4391	0.4956	-0.2833	0.071
105079	0.3118	0.8867	0.1072	-0.1058	-0.1866	0.8703	-0.2506	0.4765	0.1308	-0.4561	-0.106	0.289	0.0336	0.0631	0.0556	-0.1136	0.1095	0.3786	-0.2117	-0.1698	-0.4348	0.507	0.1689	0.0809	-0.2551	0.0251	0.1774	0.2778	0.9976	0.1234	0.973	-0.1062	0.3346	0.2363	-0.2023	0.0308	0.056	0.0541	-0.0017	0.2972	0.1194	0.1186	0.1201	0.1943	-0.0594	0.0853	-0.0292	0.1859	0.1309
105080	0.3423	-0.4341	0.4393	-0.7897	-0.4351	0.0285	0.486	-0.1618	-0.5008	-0.7234	0.0039	0.1315	0.0127	0.2301	0.1924	0.1761	0.2639	-0.5246	-0.6759	0.8357	-0.2022	0.2761	-0.1697	0.1576	0.1437	-0.7699	-0.572	-0.3086	0.2752	-0.6396	0.2555	0.2005	-0.0998	0.2853	-0.4693	0.3974	-0.9886	1.0547	0.1435	0.4932	0.3727	0.3649	1.08	-0.3312	0.1502	0.1928	0.5679	-0.3414	1.0553
105082	0.2227	-0.2868	-0.3556	-0.1316	-0.0684	-0.2357	-0.0423	0.1053	0.4424	0.6825	-0.3475	-0.2855	-0.3198	-0.0048	0.2965	-0.111	0.0606	0.08	0.2174	0.4284	0.0701	-0.2436	-0.0639	0.0659	0.2409	0.3611	-0.3456	0.1352	0.314	-0.7275	-0.0112	-0.2223	-0.2818	-0.1607	-0.0149	-0.4902	0.1316	0.4217	0.3175	-0.1496	-0.1803	0.396	0.0178	0.0097	0.0147	-0.0066	-0.2014	-0.4574	0.1191
105087	0.3046	-0.4689	-0.2106	0.3568	0.4152	-0.737	0.5472	-0.6771	-0.674	0.6711	-0.1491	-0.4896	0.2596	0.3288	0.7055	0.0528	-0.2249	0.438	-0.2985	0.1313	0.3117	0.2483	0.6062	0.0047	0.7607	0.0386	0.1429	-1.2905	0.4228	0.0762	0.3339	0.2584	-0.5349	-0.5851	0.2583	0.1766	0.0733	0.216	0.1415	0.1506	0.6076	0.0716	0.0566	-0.3282	-0.8182	0.0951	0.7843	-0.5594	-0.668
105105	-0.1052	0.0661	-0.6557	-0.0002	0.2252	0.1967	0.3865	0.5879	0.0749	0.3974	-0.2627	0.206	-0.1639	0.167	-0.0027	-0.1188	0.2152	0.0435	0.3712	0.3363	0.3358	0.0129	-0.1715	-0.077	0.326	0.1153	0.0973	0.4135	0.0612	-0.2153	-0.2375	-0.0891	-0.5385	0.3188	-0.0969	-0.3981	0.2234	0.5688	0.3611	-0.1649	-0.1766	0.4794	0.0397	0.2056	0.1424	0.3386	0.2092	0.1256	-0.0466
105120	-0.0361	-0.0049	0.2002	-0.3642	-0.0473	0.085	0.0585	-0.1496	-0.2573	-0.2475	0.0292	-0.0954	-0.0869	0.0889	-0.1463	0.103	-0.25	0.1467	-0.1315	-0.3257	-0.0265	0.084	0.2024	0.1817	0.2799	0.0744	0.1477	-0.2804	-0.6312	-0.0575	0.0593	0.1636	0.0512	0.093	-0.0739	-0.2216	-0.21	-0.2019	-0.0281	0.0925	-0.0024	-0.3234	0.0452	0.1985	0.1343	0.2267	0.1557	0.0083	-0.003
105155	-0.4023	-0.5911	-0.7374	-0.0916	-0.3311	0.2676	-0.2821	0.9586	0.4401	0.7596	-0.1119	0.0833	-0.0812	-0.327	0.0685	-0.4267	0.3405	0.4095	0.7682	0.377	-0.4592	-0.6482	-0.369	-0.3293	-0.2664	0.0739	-0.652	0.1395	-0.04	-0.7867	-0.5249	-0.5336	-0.1757	-0.5505	0.3689	-0.5855	0.8131	-0.0436	0.3752	-0.4898	-0.3595	0.389	0.0759	0.3101	-0.7121	-0.3446	0.0328	-0.2734	-0.0278
105172	-0.3091	0.0781	0.4167	0.0119	0.1691	-0.5422	-0.1826	-0.5909	-0.4523	-0.6478	0.0546	-0.5045	0.162	0.2213	0.0104	0.0689	-0.1354	0.0487	-0.2762	-0.2025	0.1771	0.021	0.0832	-0.067	0.1303	-0.4956	0.1324	-0.5144	-0.4956	0.6218	0.2159	0.3303	-0.0881	0.154	0.3585	0.1083	-0.6011	-0.2483	-0.4692	0.4606	0.2292	-0.524	0.0511	-0.5206	0.0417	-0.2777	-0.0079	0.0609	-0.5816
105173	-0.0099	0.044	-0.5351	0.3847	0.2412	0.3207	0.1477	0.7348	0.286	0.7336	-0.0762	0.4517	-0.1091	-0.245	0.4811	-0.2199	-0.0932	-0.3066	0.2173	-0.0093	-0.287	-0.3402	-0.4911	-0.5138	-0.3556	-0.0935	-0.2826	-0.1899	-0.0017	-0.3377	-0.5922	-0.3241	0.0033	-0.3469	0.0198	0.1356	0.2938	0.2513	0.8646	-0.1663	-0.1484	0.7142	0.2632	-0.0472	-0.5233	0.0439	-0.0586	0.252	0.5309
105194	0.0827	-0.024	-0.2222	0.0241	0.0284	0.491	0.462	0.5178	0.1201	0.3364	-0.0239	0.0836	-0.0792	-0.0495	0.0919	-0.1481	-0.0087	0.1852	0.5301	0.1794	0.0911	-0.0524	0.0312	-0.0993	0.0108	0.0954	-0.0354	0.1921	0.4693	-0.3538	-0.1674	-0.1422	-0.3118	-0.1898	-0.19	-0.4845	0.2984	0.512	0.2512	-0.2129	-0.2848	0.6286	-0.027	0.3427	0.1772	0.4949	0.0205	0.0862	0.024
105208	0.2284	0.1076	-0.5645	0.3559	0.0875	0.4271	0.4287	0.8852	0.2599	0.8108	-0.0033	0.122	0.347	-0.2179	0.3658	-0.2784	0.3394	0.4058	0.802	0.0253	0.0236	0.0911	-0.0359	-0.315	-0.0116	0.1774	-0.0313	0.2684	0.603	-0.4599	0.1047	-0.0609	-0.101	-0.1393	-0.0322	-0.1809	0.7334	0.5241	0.5525	-0.1032	-0.1944	0.3779	0.0151	0.2493	-0.5546	0.1436	0.1446	-0.2508	0.1352
105211	-0.4414	-0.2485	-0.8943	0.2164	-0.2742	0.252	-0.1154	0.4096	0.0797	0.621	0.0822	0.0032	0.0549	-0.2722	0.2926	-0.4982	-0.0979	-0.1718	0.1838	-0.0217	-0.3188	-0.4282	-0.3705	-0.1179	-0.3524	0.2285	-0.2585	0.0387	-0.4921	-0.2616	-0.481	-0.2453	0.2466	-0.6112	0.1988	-0.3131	0.5582	-0.2624	0.2451	-0.5704	-0.3289	0.3442	-0.0786	0.2317	-0.6827	-0.2433	0.01	-0.2073	0.1779
105226	-0.365	0.1316	-0.3205	0.0227	0.0321	-0.0585	-0.2284	0.1785	0.2339	0.258	-0.1492	0.0042	-0.1755	-0.3123	-0.3756	0.0577	0.0139	-0.0857	-0.1258	0.2234	-0.0407	-0.0718	-0.3479	-0.0584	-0.3726	-0.1463	0.1033	0.7389	0.6975	0.0785	0.0213	0.1045	0.4028	0.0653	0.0823	0.1273	-0.0249	0.6015	0.3609	0.0954	0.2404	0.4351	-0.3488	-0.1967	-0.156	-0.3913	-0.4739	0.1301	0.0554
105227	-0.3014	0.6843	0.8733	0.2449	-0.1619	-0.5855	-0.2051	-0.4096	-0.3749	-0.7822	0.2394	-0.0476	0.3966	-0.1685	-0.3234	0.2835	-0.0028	-0.0462	-0.3819	-0.7394	0.1481	-0.1936	0.0664	-0.1906	-0.1271	-0.7767	0.2343	-0.4415	-0.8647	0.7248	-0.2667	0.2112	-0.1635	0.2452	0.2893	0.2809	-0.0929	-0.7804	-0.6261	0.3317	0.5282	-0.6147	-0.1778	-0.385	-0.0839	-0.5003	-0.3362	0.349	-0.8475
105239	0.0432	0.0129	-0.3651	0.0852	-0.1718	0.2519	0.2972	0.6715	0.0257	0.6519	0.0824	-0.0741	0.2527	-0.003	-0.2324	-0.1021	-0.1453	0.3495	0.4256	-0.183	-0.0983	-0.3167	-0.0321	-0.2315	0.2709	0.1421	0.4693	0.2078	-0.1713	-0.3872	-0.0857	0.1977	-0.2697	-0.2425	-0.0431	-0.4208	0.3899	0.0195	0.5247	0.0276	-0.2832	0.336	0.4124	0.3794	-0.7691	0.2208	0.2973	-0.0729	0.1481
105260	0.5477	-0.0654	0.2302	-0.3723	-0.1428	0.1215	0.2329	-0.2906	0.3609	0.4615	-0.5375	-0.2194	-0.4367	0.1885	-0.1458	-0.0607	-0.1929	0.2791	-0.38	-0.3077	-0.0776	-0.1251	-0.3881	-0.0244	0.1062	0.4712	-0.2749	-0.3677	0.0764	-0.5896	0.135	-0.2771	-0.6286	-0.6186	-0.5304	-0.9112	-0.151	0.0266	-0.0843	0.0998	0.1323	0.0903	0.4077	0.1426	0.121	0.4398	-0.0661	-0.4944	0.2832
105266	-0.5795	-0.121	-0.3053	0.2764	-0.2504	0.4493	0.1	-0.3153	-0.2745	-0.1897	0.0328	0.1848	-0.1267	-0.0066	0.0944	-0.3835	-0.1774	0.0546	0.3781	0.2032	-0.3411	-0.0216	-0.4294	-0.1213	0.1038	0.3093	0.054	-0.3731	0.5372	-0.0391	-0.2059	0.0489	0.4378	-0.1365	0.0836	-0.3923	0.2041	0.3853	0.1479	-0.0916	-0.1184	0.5693	-0.0549	-0.1355	-0.1555	0.2966	0.0404	0.0482	0.6263
105271	-0.0528	0.551	0.6404	-0.285	-0.5035	0.0346	0.0864	0.1029	0.481	0.4567	-0.3579	0.1709	0.379	-0.3882	-0.5842	-0.291	0.5042	-0.1429	0.129	0.049	-0.3903	0.0928	-0.0176	0.0028	-0.3232	0.0917	0.1883	-0.1273	-0.186	-0.3682	-0.244	-0.283	0.0774	-0.9032	0.2871	-0.1992	0.5868	0.3378	0.6212	-0.3629	-0.449	0.1782	-0.4595	-0.3257	-0.69	0.0821	-0.2809	0.0373	0.2502
105274	-0.1575	-0.3523	0.1278	-0.4502	-0.4171	0.667	-0.2751	-0.1456	0.1276	0.3336	0.0377	0.1841	0.0231	0.1701	0.2884	0.1902	0.3364	-0.3867	-0.0757	-0.1739	-0.162	0.0535	0.1474	-0.1287	0.0986	0.1421	0.0377	0.7507	0.3772	-0.0847	0.7403	0.5659	0.2073	0.2289	-0.2174	0.1069	0.0058	0.1612	-0.0086	0.0005	-0.0798	0.1641	-0.2317	-0.0105	-0.0983	0.3531	-0.2655	-0.0157	0.4637
105289	0.2173	0.028	0.1831	-0.2081	-0.1067	-0.1353	-0.2545	-0.1064	-0.1166	0.0058	0.1805	0.2338	0.0034	0.0608	0.2016	-0.0086	0.1343	-0.161	0.1936	0.0585	0.1212	0.2164	0.1901	0.2644	-0.0235	-0.2257	-0.1023	0.0351	0.3652	0.0758	-0.0118	-0.0844	0.2342	0.0683	-0.1632	0.2466	-0.0024	0.0441	-0.0354	-0.0433	0.1295	-0.1971	-0.1466	0.2428	0.1718	-0.0366	-0.1998	0.0903	0.2647
105293	-0.1832	0.6385	0.9344	0.1861	0.4427	-0.6688	-0.2217	-0.104	-0.2237	-1.0099	0.104	-0.0734	0.4094	-0.1965	-0.2489	-0.4206	-0.0535	0.2696	0.0378	-0.1769	0.3797	-0.0731	-0.3939	-0.0533	-0.2261	-1.1887	-0.2552	-0.1407	0.4245	0.733	-0.3222	0.1498	-0.1357	0.5118	0.5919	0.6107	-0.3408	-1.196	-0.7422	0.0694	0.7848	-0.8539	-0.3572	-0.6554	0.3525	-0.8293	-0.4992	0.416	-0.8192
105296	-0.2928	0.8942	0.1468	0.4121	-0.6772	0.205	-0.0641	-0.0824	0.8033	-0.6252	0.1026	0.8698	-0.2807	-0.6223	-0.675	-0.0009	0.2471	-0.0047	-0.4069	0.5197	0.162	-0.3706	-0.3104	-0.5231	-0.7798	0.1437	-0.0045	0.6222	-0.302	-0.2883	-0.8706	-1.0324	-0.5976	0.5772	-0.0331	0.1191	0.3058	-0.2638	-0.9425	-0.811	0.1614	-0.6528	0.1754	-0.1221	-0.4678	-0.9113	-0.0154	0.2347	0.1661
105298	0.2113	-0.2076	-0.3713	0.5027	-0.33	0.288	-0.0239	-0.6183	-0.1543	-0.0421	0.68	0.2254	-0.4202	0.0281	-0.0338	-0.126	-0.1351	-0.1854	0.1575	-0.6259	-0.1532	0.4375	0.003	0.1364	0.0756	0.0608	0.1979	0.5342	0.212	0.4036	0.1587	0.2574	0.4612	0.3739	-0.283	0.2288	-0.13	0.6334	-0.1603	-0.0551	-0.365	0.2502	0.0716	0.3667	0.1378	0.2146	-0.1311	-0.1828	0.4898
105317	0.0065	-0.1082	0.3675	-0.0511	-0.0063	-0.7005	-0.204	-0.69	-0.492	-0.7255	0.0398	-0.4253	0.0765	0.444	-0.0757	0.0974	-0.2108	-0.0167	-0.4518	0.0458	0.149	-0.0448	0.0163	0.1484	0.42	-0.1416	0.3878	-0.6042	-0.0392	0.47	0.0803	0.3753	-0.1016	0.0267	0.1963	-0.1574	-0.6028	0.08	-0.3686	0.4052	0.3529	-0.7407	0.239	-0.5557	0.03	-0.2511	0.276	-0.0212	-0.5651
105321	-0.068	-0.3516	0.9437	-0.1531	-0.0764	-0.8826	-0.7695	-0.2564	0.1144	-0.4393	0.1451	-0.4312	0.2244	0.6967	0.112	0.0057	-0.3131	-0.0893	-0.5067	-0.2377	0.3687	0.1115	0.0299	0.1679	-0.2625	-0.0843	0.1765	-0.2041	0.5565	0.5895	0.4321	0.4095	-0.2546	0.3485	0.4376	0.303	-0.4361	0.4829	-0.2783	0.3399	0.1135	-0.2437	0.167	-0.0692	-0.0902	-0.1681	0.142	0.3582	0.4769
105322	-0.1957	0.5747	0.8146	0.253	-0.1462	-0.7044	-0.2123	-0.4119	-0.1473	-0.7814	0.209	0.004	0.3083	0.1415	-0.1625	0.466	-0.0343	0.635	-0.2661	-0.1239	0.2991	-0.323	-0.0664	-0.3295	-0.0074	-0.8507	-0.1583	-0.5102	-0.6797	0.4306	-0.2213	0.0408	-0.4076	0.1765	0.2907	-0.0727	-0.4579	-0.8062	-0.5678	0.2	0.5371	-0.8638	-0.065	-0.5638	-0.2507	-0.4869	-0.381	0.0209	-0.5771
105334	-0.1628	-0.01	0.2328	0.1692	-0.233	0.2202	-0.1378	-0.1502	-0.0092	-0.0784	0.3458	0.3441	-0.0061	-0.0657	0.151	0.0824	0.227	-0.2949	-0.0345	-0.2821	-0.0138	0.3404	-0.0049	0.0895	-0.2772	0.0972	0.2852	0.3074	0.5582	0.2611	0.1451	0.1053	0.1194	0.4019	0.0152	0.3878	-0.2251	0.6687	0.0805	0.1143	-0.1468	0.282	0.092	0.2516	-0.1582	0.1968	0.1182	0.3153	0.4762
105351	0.0645	-0.1776	-0.2811	0.0967	0.1929	0.3173	0.2505	0.4355	0.003	0.233	0.1421	-0.0229	0.0207	0.1137	-0.1884	0.3067	0.2293	0.3351	0.357	0.8224	-0.0033	0.3417	0.1496	0.0905	0.4513	0.6293	0.31	0.2882	-0.0682	0.0426	0.1037	-0.0758	-0.4031	-0.1536	-0.0526	-0.3098	0.263	0.5818	0.3422	-0.1585	-0.3198	0.3751	-0.0568	0.3097	0.0969	0.1262	0.7627	0.3944	0.2306
105355	-0.1862	0.9158	0.9431	0.2446	-0.2036	-0.9751	-0.3543	-0.8524	-0.535	-1.1399	0.1438	-0.0343	0.3362	-0.1699	-0.3067	0.2074	0.0343	0.2928	-0.3739	-0.4991	0.2213	0.0943	0.0173	-0.2921	-0.1868	-0.8937	0.1758	-0.2509	-1.0584	0.8141	-0.2523	0.2919	0.0648	0.2709	0.4205	0.2034	-0.0073	-1.2928	-1.0144	0.3302	0.7771	-1.5591	-0.251	-0.3878	0.1739	-1.2248	-0.2838	0.1782	-0.8361
105365	-0.1439	-0.2115	0.1251	-0.4105	-0.2885	-0.1484	-0.0241	0.0105	0.027	-0.1125	-0.0984	-0.0394	-0.0771	0.5323	-0.2281	0.1415	-0.0742	-0.3736	-0.1566	0.4288	-0.3271	0.1023	-0.0755	0.707	0.2627	0.06	-0.0958	0.1718	0.5431	-0.1583	0.3665	0.1174	0.2818	0.0258	-0.1853	0.1488	-0.0986	0.4327	-0.0667	0.3871	-0.2579	-0.1705	-0.1999	0.0611	-0.4402	-0.1135	0.3859	0.0999	0.2851
105376	-0.0987	-0.5612	-0.1475	-0.2423	0.0628	-0.3514	0.2617	-0.4584	-0.0818	-0.5957	0.1525	-0.2948	-0.4733	0.2969	-0.3717	0.09	0.4985	0.0135	-0.0475	0.2269	0.0109	0.109	-0.2252	0.0626	0.4491	-0.0625	0.1093	0.4772	0.4653	0.0151	-0.2186	0.2803	0.1388	0.2944	-0.0058	-0.0861	-0.1367	0.328	-0.0432	0.1242	0.329	0.1561	-0.136	-0.0594	-0.5138	0.4293	-0.106	-0.8999	0.0856
105378	0.5306	1.5175	1.1904	-0.5537	0.2025	-0.4408	0.2238	0.2524	-0.1329	-0.1142	-0.631	0.6458	-0.165	0.4261	0.3369	0.1679	0.2604	0.7038	0.2258	-0.5347	0.4399	-0.1157	0.0559	-0.0365	-0.0387	-0.7888	-0.1973	-0.3785	-0.6688	-0.2037	-0.6897	-0.3037	-0.1191	-0.1307	0.0321	-0.5912	0.5498	-0.6966	0.3162	-0.5615	0.1068	-0.5656	-0.1711	-0.0344	0.1486	-0.0146	-0.133	0.5572	-0.4972
105383	-0.2115	0.0483	0.2928	-0.1973	-0.3509	0.3233	-0.0917	-0.4304	-0.0499	-0.4115	0.1635	0.0684	-0.1348	0.039	-0.323	-0.2304	-0.0062	-0.0103	-0.0178	0.0231	-0.0153	0.1181	-0.2312	0.2179	-0.2345	0.0007	0.1229	0.4121	-0.1678	0.162	0.401	0.3363	-0.1215	0.4773	-0.0591	0.3853	-0.5597	0.5252	-0.0619	0.1375	-0.1277	0.1366	-0.0436	0.151	0.0153	0.4129	0.1153	-0.0152	0.3078
105404	-0.2115	0.4432	-0.2324	-0.0082	-0.0802	0.0624	0.13	-0.2531	-0.1956	0.142	0.1036	0.4755	0.0455	-0.0068	0.2693	-0.0957	0.0719	-0.3548	0.5065	-0.1684	0.0475	0.3286	-0.0512	0.1601	-0.0772	0.2655	0.2293	0.5441	0.5469	0.2303	-0.5219	0.0365	0.2808	-0.1075	0.1133	0.0461	0.2062	0.7577	0.061	-0.2425	-0.2275	0.3889	-0.1364	0.4978	-0.0774	0.3019	0.3306	0.3165	0.3283
105417	-0.3792	-0.6379	-0.1882	-0.059	0.0606	0.1074	0.0324	-0.0822	0.3218	0.3736	-0.1734	0.007	-0.1222	0.072	0.193	0.268	0.3164	-0.2195	0.3978	0.2986	-0.0898	0.1516	-0.2459	-0.0588	0.1582	0.2551	0.0081	0.408	0.4107	-0.1087	-0.0409	-0.1491	0.2075	-0.0589	-0.3912	-0.0864	-0.3164	0.6996	0.1141	0.0088	-0.4298	0.0992	-0.1502	0.2835	-0.2412	0.2649	0.0425	-0.5758	0.5728
105421	0.1192	0.0189	0.1217	-0.0776	0.0469	-0.2999	0.2756	-0.4919	0.0811	-0.5142	-0.5448	0.2336	0.2512	0.3334	0.04	0.4198	0.0409	-0.6622	-0.31	0.3574	-0.1664	0.0896	0.7018	-0.0153	-0.2698	0.453	-0.1698	-1.1257	0.2662	-0.125	0.0075	0.5292	-0.0369	0.2036	0.3046	-0.7125	-0.0715	1.3212	0.392	0.1458	-0.0391	0.5722	-0.0061	-1.0672	-0.1167	0.8549	0.3337	-0.1442	0.1438
105423	0.4201	-0.1469	-0.2473	-0.2007	-0.0695	0.3081	0.2843	0.3755	0.3316	0.433	-0.2008	-0.1917	-0.2134	0.0628	0.2415	-0.061	-0.1644	0.0151	-0.0977	0.1053	-0.0426	-0.2022	-0.0178	-0.0218	0.1223	0.1749	-0.3886	-0.1557	-0.0687	-0.5635	0.12	-0.3795	-0.3591	-0.3291	-0.2371	-0.1242	0.1151	0.1345	0.0988	-0.0305	-0.1416	0.3748	0.2137	0.2674	0.2507	0.3391	-0.0422	-0.031	0.1012
105427	0.4122	0.1113	0.7744	-0.6514	0.378	0.5027	0.5981	1.2461	-0.7646	0.0203	-0.5836	-0.4871	0.2842	0.0921	0.1026	0.3567	0.7195	0.8532	0.0407	-0.7962	0.8107	-0.0633	0.5754	0.2967	1.1684	0.5074	-0.1435	0.152	-0.041	-0.1137	0.7788	-0.2265	-0.8454	-0.3425	-0.6992	-1.3924	0.2156	0.5657	0.0487	0.4815	0.1734	0.2983	0.4218	0.7206	0.6233	0.8475	0.1568	0.1889	1.7158
105431	0.4182	-0.0579	-0.6034	0.0137	0.0237	0.4449	0.1163	0.5201	0.1841	0.6065	-0.1074	-0.0126	-0.0437	-0.201	-0.061	-0.072	-0.3157	0.0174	0.1845	0.2313	-0.0905	-0.1416	-0.1872	-0.0444	-0.0436	0.3305	-0.13	0.3786	-0.0605	-0.4703	0.028	-0.2231	-0.2657	-0.2607	-0.258	-0.3306	0.3459	0.0888	0.1092	-0.065	-0.0586	0.2719	0.0441	0.2465	0.1156	0.2004	-0.0499	-0.1062	-0.0021
105434	-0.0186	-0.1316	-0.2481	0.0571	-0.0368	0.4948	0.5849	0.8243	-0.129	0.1874	-0.3842	-0.456	0.0996	-0.053	0.0409	0.1619	0.1411	0.2202	0.3716	0.1124	-0.287	0.3996	0.3027	0.2449	0.0931	0.4962	-0.1668	0.3298	0.3406	-0.4476	0.1905	0.2059	0.0408	-0.3042	0.2111	-0.1334	0.0679	0.5256	0.6906	0.0387	-0.5535	0.5185	0.1658	-0.4713	-0.2906	0.4299	0.0659	-0.0371	0.437
105435	-0.149	-0.1451	0.0665	-0.0898	0.0648	0.1381	0.4104	0.3014	0.3288	0.0169	0.3497	0.1464	0.2707	-0.0554	0.3771	-0.1309	-0.2534	-0.5258	0.4025	-0.2764	-0.0572	0.4763	0.3906	0.2243	0.0468	0.3264	0.145	0.5404	0.2557	0.0975	0.0464	0.1012	0.0173	0.252	0.1816	0.2711	-0.1904	0.6451	0.2933	0.4299	-0.2891	0.037	-0.2206	0.5313	0.0817	0.4056	0.2944	0.1039	0.6727
105463	1.4674	-0.402	0.155	-0.1205	-0.0203	0.1527	0.4364	0.3744	0.3819	0.8089	-0.6878	-0.3313	-0.128	-0.1377	0.4413	0.3214	0.5557	0.0003	0.1908	0.1729	0.4078	0.0342	0.1977	-0.0523	0.5658	0.5175	-0.1166	0.033	0.3241	-0.5775	-0.092	-0.3724	-0.4621	-0.6772	-0.6633	-0.6219	0.1952	0.5034	0.0073	-0.1756	-0.1859	0.3984	0.1201	0.1935	0.2369	0.7709	-0.2032	-0.1778	-0.0166
105497	0.0136	-0.035	-0.03	-0.0269	0.0947	0.2632	0.1812	-0.1239	0.3039	-0.0319	0.0938	-0.027	0.0435	0.1326	-0.0096	0.0187	-0.1505	-0.0265	0.1985	-0.0532	-0.0533	0.2018	0.1051	0.1709	-0.0137	0.2411	0.1828	-0.122	-0.415	-0.0146	0.1404	0.249	0.0156	-0.004	-0.004	-0.1049	0.0452	0.1386	-0.0915	0.0439	-0.2328	0.144	0.0866	0.1685	0.3337	0.4964	0.2456	-0.0631	-0.0978
105510	-0.378	0.1259	0.1012	0.1179	0.0441	-0.129	-0.0432	-0.3618	-0.5893	-0.612	0.088	0.0562	-0.0709	-0.0166	0.1183	-0.1309	-0.0338	-0.1571	0.3589	-0.4921	0.0743	0.0874	-0.2493	-0.1151	0.0028	-0.2852	0.0209	-0.1142	-0.6365	0.5467	-0.4665	0.3191	0.2089	0.0402	0.1382	-0.2557	-0.2152	-0.0487	-0.1153	-0.006	0.1173	-0.3148	-0.1445	0.1518	-0.272	0.3221	0.1248	0.0339	-0.2992
105515	0.0097	-0.0596	0.5271	0.0183	0.0285	-0.656	-0.1845	-0.5807	-0.4734	-0.4873	0.0361	-0.3985	-0.109	0.096	0.1377	0.1714	-0.1473	-0.0709	-0.2819	-0.3727	0.2362	0.0753	0.1192	0.2402	0.0366	-0.2367	-0.1892	-0.5188	-0.5235	0.4004	0.0946	0.189	-0.1201	0.2502	-0.0014	0.3532	-0.3574	-0.261	-0.4832	0.2032	0.3172	-0.2859	0.104	-0.0086	0.2157	-0.0983	0.0259	0.0715	-0.2701
105520	0.0777	-0.1196	-0.0047	-0.5525	-0.3674	-0.4246	0.0328	-0.1813	0.15	-0.671	-0.7401	0.1827	-0.0313	0.2695	-0.5004	0.4921	-0.5219	-0.701	-0.5631	0.6751	-0.766	-0.2854	0.7134	0.4127	-0.0796	0.5978	-0.2947	-0.8469	0.8128	-0.6982	-0.0075	0.1214	0.0728	0.521	-0.1459	0.5608	-0.3157	-0.2949	0.3395	0.2133	0.5706	0.1361	-0.0265	-0.4347	-0.0425	-0.0955	0.7236	-0.1889	-0.1471
105525	0.7794	-0.5	0.1563	-0.5258	-0.1051	-0.3444	0.473	-0.126	-0.6212	-0.446	-0.4013	-0.2762	-0.5512	0.1405	0.1155	0.4522	0.1369	-0.6977	-0.2802	0.3	-0.0472	0.0376	-0.0217	0.0729	0.0923	-0.0309	0.2201	-0.8274	0.4279	-0.0447	0.4022	0.3786	-0.0324	0.1089	-1.2356	0.4561	-0.4282	0.6215	-0.0769	0.3096	0.4291	0.2383	-0.07	-0.236	0.282	0.594	-0.3746	-0.3066	0.5248
105530	0.4202	-0.1446	0.2445	-0.1533	-0.0368	0.5523	0.1775	0.0645	-0.0943	-0.0662	-0.1737	0.1007	-0.3389	0.0884	0.1265	0.235	0.0104	-0.252	0.0342	-0.4402	-0.0665	0.3892	0.0015	0.1135	0.2331	0.3951	0.2771	0.1731	0.6847	0.0947	-0.2261	0.1188	0.0298	-0.0901	-0.5747	-0.1812	0.1153	0.5524	0.2311	-0.0059	-0.3339	0.1404	0.1664	0.3204	0.404	0.7531	-0.1929	-0.144	0.1726
105539	-0.5716	-0.1124	-0.2726	0.0669	0.1554	-0.1401	-0.7728	-0.0306	-0.0352	0.0419	-0.137	-0.0618	-0.3982	-0.2148	-0.5126	-0.4996	0.2965	0.0447	0.1163	0.0185	-0.3384	-0.2929	-0.3722	0.087	-0.224	0.0778	-0.0286	0.2207	0.3445	-0.1553	0.0857	-0.3251	0.1523	0.4323	0.2756	0.4162	0.3643	0.4302	0.1885	-0.1558	-0.1483	-0.0862	-0.1938	0.0007	-0.4725	-0.3484	0.11	-0.1829	0.2843
105550	-0.1379	-0.0292	-0.6767	0.2774	-0.1154	0.232	-0.1706	0.3675	0.5539	0.4237	0.3943	0.229	-0.0452	-0.1602	0.0838	-0.2044	-0.0949	0.2554	0.4176	0.3211	-0.5006	0.0497	-0.0614	0.1001	-0.0907	0.2564	0.0488	0.5666	0.1904	0.1202	-0.0349	-0.505	0.0238	-0.0638	-0.0141	0.1741	0.5924	0.3249	0.4157	-0.1998	-0.2646	0.2126	0.2279	0.5074	0.1154	0.531	0.2848	-0.0195	0.2625
105553	-0.269	0.0392	-0.7919	-0.0493	0.7089	0.2533	0.4927	0.2945	0.0789	0.5748	0.1541	0.0772	0.2423	-0.4223	-0.523	0.4181	-0.1263	-0.2436	0.3377	0.0523	0.0761	0.0279	-0.1773	-0.1896	-0.3814	0.1872	-0.502	0.6551	0.4059	-0.6895	-0.2213	-0.288	-0.5712	-0.045	0.053	0.2259	-0.2206	-0.4249	-0.0224	-0.0976	-0.1094	0.1797	-0.1196	-0.2872	-0.9295	-0.4014	0.056	0.3257	-0.3074
105555	-0.0954	0.3454	-0.7824	-0.0905	-0.3235	0.6473	-0.0401	0.4274	-0.2361	0.2992	0.0622	0.1597	-1.0299	0.0037	0.0761	-0.2153	-0.8385	0.4115	-0.2678	0.146	-0.2358	-0.119	-0.4485	-0.0741	0.2103	-0.0066	-0.4692	0.5452	0.3501	-0.3246	-0.2856	0.0342	0.2498	-0.0956	-0.467	0.5083	0.0812	0.7312	1.0129	-0.946	-0.0237	0.8291	0.4022	0.2935	-0.2559	0.3615	0.1619	0.1175	-0.3247
105559	0.1206	-0.5048	-0.661	0.2679	0.339	0.0963	0.7634	0.7659	0.009	0.1047	0.0333	0.1742	0.2835	-0.1734	0.4936	0.3235	-0.5445	0.1291	0.0245	-0.2332	0.0975	-0.0363	0.1136	0.0908	0.2825	0.7989	0.1485	0.5336	0.0254	-0.2777	0.8699	0.1991	0.2677	-0.4839	-0.2114	-0.2409	0.4394	0.5201	0.2268	0.0235	-0.0575	0.1543	0.3433	0.3375	-0.1063	0.4916	0.4568	0.0641	-0.3431
105570	0.5447	1.4969	1.3028	-0.7447	0.0252	-0.5512	0.235	0.2555	-0.0972	-0.0961	-0.7274	0.6494	-0.1844	0.4948	0.4326	0.2067	0.5352	0.6024	0.1958	-0.8374	0.4497	-0.1221	0.3118	-0.0343	0.0098	-0.9613	-0.2302	-0.8327	-1.0452	-0.176	-0.6514	-0.2702	-0.3259	-0.0805	-0.1191	-0.6177	0.2919	-0.9766	0.3799	-0.5189	0.0455	-0.353	-0.1558	0.0755	0.0819	0.0687	-0.0983	0.53	-0.5956
105575	0.7326	-0.5764	0.6031	-0.4055	0.151	-0.2121	0.1605	-0.078	-0.5523	-0.219	-0.3699	-0.3961	0.0698	0.3313	0.7423	0.2905	0.6243	-0.189	0.0071	0.0764	0.511	0.5387	0.7864	0.834	0.8383	0.4404	0.2125	0.0165	0.7056	0.367	0.2441	0.1964	0.2124	0.1331	-0.9279	0.4861	-0.1502	0.545	-0.4913	0.2004	-0.119	0.1201	0.1742	0.3872	0.3943	0.8256	0.1878	-0.0212	0.0794
105587	0.1196	-0.6775	0.4473	-0.142	-0.1203	0.4019	0.1284	0.2316	-0.1485	0.4584	0.206	0.1002	0.0108	0.32	0.4686	0.0904	0.7426	0.1823	0.4426	0.0396	0.186	0.3413	0.2027	0.2889	-0.0369	0.2452	0.3114	0.4238	0.703	0.0021	-0.211	0.2343	0.2596	-0.0209	-0.0801	-0.0041	0.3259	0.7697	0.1243	-0.0333	-0.2996	0.3867	-0.2551	0.2025	-0.0633	0.4894	0.3658	0.1165	0.2004
105591	0.7553	-0.3935	0.0464	-0.4241	0.16	0.4528	0.306	0.5074	0.3168	0.4724	-0.4889	-0.472	0.0079	0.147	0.2932	0.1589	0.4046	0.0951	0.1378	0.174	0.1713	0.133	0.4237	0.2067	0.7496	0.5659	-0.0207	-0.0958	0.0663	-0.4888	0.2124	-0.1974	-0.1488	-0.5239	-0.3781	-0.5605	0.0969	0.0703	0.0749	-0.1178	0.027	0.2373	0.2782	0.1312	0.2524	0.191	-0.0696	-0.2547	-0.1247
105597	-0.6966	-0.6022	-0.6885	0.0967	-0.1986	0.2557	0.0688	0.5297	0.123	0.6757	-0.1608	0.0841	-0.1404	-0.251	0.0114	-0.4001	0.2031	-0.1746	0.5311	0.3077	-0.414	-0.4071	-0.3938	-0.2059	-0.518	0.2566	-0.3564	0.199	0.1246	-0.4403	-0.3662	-0.3622	0.0043	-0.5945	0.1612	-0.6258	0.533	0.3806	0.4396	-0.4528	-0.3182	0.4407	0.0149	0.1095	-0.7432	-0.1907	0.1468	-0.3528	0.1623
105602	-0.0607	-0.1593	-0.2543	0.0677	-0.1721	0.4479	0.1111	0.2272	-0.0526	0.317	0.1451	-0.1993	-0.0609	-0.1484	-0.1615	-0.2487	0.0701	-0.0973	0.2664	0.0249	-0.2784	-0.0049	-0.0298	-0.0302	-0.0895	0.2162	-0.0445	0.2073	-0.2129	-0.2585	0.2554	0.0018	0.108	-0.1862	0.0283	-0.2821	0.0368	0.2876	0.2536	0.1284	-0.3645	0.3113	-0.193	0.11	-0.3594	-0.0539	0.1075	-0.1859	0.0705
105603	-0.4456	-0.4717	-0.2264	0.0994	0.2021	0.2365	-0.0602	-0.3442	-0.4787	-0.4608	0.0358	0.0353	-0.4909	0.093	0.4093	0.0084	0.1913	-0.4976	0.5219	-0.202	-0.0723	0.081	-0.4912	0.1549	-0.2397	0.5503	0.2287	0.3545	0.4428	0.4278	-1.0481	0.3297	0.446	-0.0813	0.154	-0.31	-0.2104	0.9208	0.0314	-0.1276	-0.0937	0.3886	-0.2261	0.1421	-0.4374	0.3617	0.4408	0.174	0.2026
105605	-0.3856	-0.9264	-0.6569	0.2554	-0.0991	0.1903	-0.0311	0.4309	0.1942	0.5974	0.0948	-0.043	-0.0635	-0.2386	0.359	-0.4957	-0.1539	-0.125	0.5473	0.2992	-0.2452	-0.2293	-0.5327	-0.0554	-0.4014	0.343	-0.2495	0.139	-0.2249	-0.2938	-0.1738	-0.451	-0.0567	-0.5606	0.2897	-0.168	0.4039	0.0498	0.2827	-0.2109	-0.2538	0.3689	-0.0102	0.1547	-0.3316	-0.251	-0.0909	-0.3556	0.3464
105615	-0.1727	-0.1359	-0.3825	0.1122	-0.1076	0.0978	-0.1175	-0.1196	0.026	-0.0591	0.2688	0.3858	-0.0608	0.2082	-0.2649	-0.1919	0.2476	-0.2335	-0.032	-0.1094	-0.228	0.3576	-0.1725	0.2853	-0.3388	-0.0622	0.0957	-0.0636	0.4303	0.0512	0.3049	0.0076	0.1356	0.218	-0.0497	0.3486	-0.1724	0.6462	0.552	0.1296	-0.4837	0.4233	-0.093	0.2279	-0.4185	0.4588	0.1657	-0.0084	0.6327
105637	-0.0391	0.5043	0.6312	0.0453	-0.3304	-0.4428	-0.2566	0.1558	-0.2014	-1.0546	-0.1838	-0.4381	0.169	-0.2201	-0.4993	0.1135	-0.385	0.1783	0.1267	-0.2397	0.0265	0.2726	0.1423	-0.259	-0.0186	-0.5806	0.2377	0.2482	-0.4049	0.4594	-0.3672	0.2925	-0.0647	0.0942	0.4519	0.434	-0.3458	-1.01	-0.5421	0.141	0.4329	-0.5738	-0.1594	-0.1564	0.0893	-0.4242	-0.2532	0.0601	-0.3762
105643	-0.4571	0.1125	-1.1865	-0.0984	-0.0144	0.3679	0.1444	0.9332	0.431	1.1562	-0.2439	0.5465	0.3878	0.037	0.0606	-0.6869	0.5298	0.197	0.407	0.4441	-0.1193	-0.4854	-0.0418	-0.0579	-0.4293	0.3862	-0.4357	0.7636	0.3399	-0.6457	-0.1449	-0.9547	-0.4062	-0.6234	0.1737	-0.3607	0.7564	0.0398	0.7444	-0.4699	-0.4313	0.687	0.3563	0.2815	-0.5314	-0.586	0.2665	-0.3519	0.096
105686	0.203	0.2796	-0.1894	-0.027	-0.1077	0.5032	-0.1958	0.1034	0.8531	0.4091	0.0893	0.2505	0.0001	0.1393	0.0657	-0.0007	0.2101	-0.5161	0.1491	0.1963	-0.2363	0.1813	0.0335	-0.2083	-0.2526	-0.0635	-0.0332	0.2846	0.0299	-0.0605	0.3253	-0.0271	0.16	0.055	-0.1277	-0.3676	0.3494	0.6049	0.2312	-0.3104	-0.3545	0.2645	-0.076	0.0702	0.0333	0.4572	-0.0206	0.2649	0.3541
105687	-0.1451	0.0348	-0.0757	-0.0074	-0.2182	0.158	0.0753	0.1069	-0.1077	0.301	-0.0111	0.2559	-0.1112	-0.1024	0.0797	0.0897	-0.0079	-0.2925	-0.157	0.0781	-0.5015	-0.0124	-0.1121	-0.0222	-0.0262	0.002	-0.124	0.1049	0.3966	0.4223	0.0148	-0.0494	-0.0306	0.1664	-0.0622	0.6791	0.038	0.2803	0.0477	0.0341	-0.2067	0.431	-0.2234	0.2224	-0.3204	0.0801	-0.1804	-0.0227	0.6856
105689	-0.3029	-0.3755	-0.7761	-0.1034	-0.1154	0.6036	-0.002	0.5917	0.3232	0.8466	-0.1768	0.0748	-0.5684	-0.3244	0.0705	-0.5567	-0.1069	0.0877	0.4385	0.2642	-0.4798	-0.442	-0.2822	0.1004	-0.3197	0.4819	-0.7457	0.4209	0.6648	-0.4458	0.0718	-0.5519	0.1782	-0.3934	0.2383	-0.1475	0.9259	0.2506	0.2538	-0.3471	-0.7261	0.5687	0.2822	0.2524	-0.7166	-0.1637	-0.1669	-0.3995	0.4361
105701	-0.0495	-0.3445	-0.2202	0.3289	-0.131	0.4983	0.1055	0.8116	0.5732	0.6664	0.0904	0.1484	-0.0461	-0.3336	0.0786	-0.4676	-0.1265	-0.0617	0.3869	-0.1321	-0.3531	-0.1935	-0.554	-0.4165	-0.5032	0.0939	-0.1456	0.3187	0.3095	-0.2382	-0.3307	-0.2263	-0.2469	-0.265	0.0515	-0.0105	0.1311	0.7295	0.3315	-0.2915	-0.4707	0.7476	0.0929	0.3115	-0.6397	0.359	0.0402	0.0768	0.371
105712	0.1963	-0.4507	-0.291	0.5912	0.285	0.0618	-0.1415	0.3842	0.3156	0.5394	-0.0864	-0.0915	-0.2241	-0.0176	0.3546	-0.1525	-0.0366	0.0191	0.0007	0.3874	-0.2881	-0.0102	-0.2799	-0.111	0.0115	0.2089	-0.2639	0.4169	0.8534	-0.315	-0.0404	-0.2566	0.0562	-0.2437	-0.2417	0.404	0.328	0.5677	0.3286	0.1115	-0.2191	0.2818	0.1043	0.1179	0.0391	0.1695	-0.1002	-0.2	0.6307
105718	0.288	0.038	-0.3968	-0.2157	-0.1008	0.5003	0.142	0.3056	0.3258	0.1653	-0.1617	-0.2115	-0.2059	-0.1534	-0.1568	-0.1422	-0.1895	0.0531	-0.1146	0.0195	-0.1178	-0.1814	-0.0532	-0.0275	-0.1623	0.2519	-0.1042	0.3039	0.551	-0.3758	0.0978	-0.1055	-0.0795	-0.2297	-0.4013	-0.0469	0.1085	0.1732	-0.1086	-0.2366	-0.0668	0.2919	0.1726	0.1808	0.1118	0.1246	-0.048	-0.2832	0.1618
105726	-0.4889	-0.512	-0.5498	0.27	-0.2135	0.0806	-0.047	0.0868	-0.2702	0.5191	0.0678	-0.1301	-0.0738	-0.0981	0.1727	-0.3629	0.0826	-0.2961	0.3974	-0.1529	-0.3818	-0.2248	-0.2446	-0.0846	-0.1325	0.1404	-0.1411	-0.0197	-0.6559	-0.0038	-0.2851	-0.0142	0.286	-0.3697	0.2589	-0.5467	0.3145	-0.097	0.1676	-0.3026	-0.4227	0.1395	-0.1356	0.0496	-0.7697	-0.197	0.2929	-0.384	0.1576
105744	0.0087	-0.0069	0.6376	-0.4413	-0.2973	-0.5187	-0.3087	-0.6619	-0.3261	-0.582	-0.2194	-0.37	-0.188	0.276	-0.7919	-0.0934	-0.1046	-0.0237	-0.7578	-0.3462	0.1099	0.0274	-0.2315	0.3013	0.05	-0.158	-0.1053	-0.3014	0.1012	0.2112	-0.1345	-0.1463	-0.3633	-0.0812	-0.1082	0.0727	-0.5442	-0.6014	-0.8905	-0.2736	0.4327	-0.4846	-0.2241	-0.2693	0.2785	-0.662	-0.1712	-0.4686	-0.7352
105790	0.3616	-0.1026	0.0846	-0.5216	-0.0662	0.3437	-0.0501	0.6221	0.4226	0.3468	-0.2849	-0.045	-0.1225	0.0658	0.4492	0.0947	-0.1461	0.0711	0.002	-0.0498	0.1526	0.0863	0.2144	0.0345	0.1204	-0.096	-0.1819	-0.2204	-0.1173	-0.4696	0.7094	0.0382	0.1043	-0.0319	-0.3936	0.1132	0.2322	-0.0539	-0.1878	0.1723	-0.0268	0.1129	0.2717	0.2405	0.241	0.1511	-0.2841	-0.2581	0.6331
105793	0.2407	-0.344	-0.1498	0.1772	0.0078	0.4547	0.4304	-0.0679	-0.1548	0.0644	0.1355	-0.0474	-0.1302	0.1184	0.6857	0.0652	0.5224	0.4151	0.2139	-0.2124	0.4168	0.0254	0.0475	-0.0808	0.4452	0.1389	0.1987	-0.0437	0.1056	-0.0232	0.0226	0.1255	-0.1702	-0.0597	-0.2691	-0.5397	0.0252	0.5052	0.3681	0.1598	0.0459	0.7961	0.0963	0.2763	0.0956	0.7748	0.0623	0.2263	-0.0537
105808	-0.1223	0.6681	1.1527	0.0573	-0.1238	-0.7204	-0.293	-0.4883	0.1517	-0.9388	0.2687	0.0201	0.2758	-0.2058	-0.1762	0.3857	0.0385	0.246	-0.1855	-0.2409	0.2417	-0.2302	-0.102	-0.3284	-0.0668	-0.849	0.0405	-0.1653	-0.8911	0.78	-0.065	-0.0742	-0.1388	0.2747	0.3881	0.2999	-0.2662	-0.8311	-0.6835	0.2686	0.6424	-0.8681	-0.3605	-0.5581	0.2477	-0.7632	-0.3162	0.3962	-1.0118
105811	-0.1483	-0.2846	0.0215	0.2908	0.0874	-0.1582	0.2647	-0.1911	0.2461	-0.1381	0.0586	0.3407	0.2402	-0.2414	-0.0151	0.0343	-0.5782	0.4815	0.2054	-0.3285	0.163	-0.0584	0.0529	-0.0161	-0.0129	0.3488	0.152	-0.5284	0.1124	0.098	-0.2558	-0.3374	0.0017	0.2907	0.0943	0.1528	0.1993	0.1921	-0.4444	-0.2928	0.0998	-0.5228	0.2329	0.1151	0.094	-0.0587	-0.0063	0.1526	0.1274
105813	-0.4777	-0.6469	-0.4432	0.1034	0.0243	-0.2488	-0.1317	-1.1369	-0.0924	0.0709	-0.3966	0.2399	-0.2527	0.1023	0.2633	-0.2032	-0.2545	-0.4404	-0.2217	0.0696	0.0266	0.2181	-0.5701	-0.3656	0.1681	0.2704	-0.0772	0.449	0.2396	-0.591	-0.7997	0.0866	0.0602	0.1826	-0.019	0.498	-0.3224	-0.1522	0.0789	-0.1281	-0.0383	0.0542	-0.0973	0.1052	-0.0503	0.4072	-0.2746	-0.3573	0.1929
105816	-0.2957	-0.2944	-0.5742	0.1915	0.1833	0.0122	-0.09	0.447	-0.1345	0.3428	-0.0347	-0.2149	0.0444	-0.0268	0.1843	-0.3674	-0.2162	0.0969	0.2955	0.2013	-0.4318	-0.2442	-0.2785	-0.088	-0.1011	0.0415	-0.1671	-0.3191	-0.8135	-0.1616	-0.3852	-0.3289	0.0615	-0.5017	0.4019	-0.5314	0.6113	-0.3214	0.43	-0.2589	-0.0371	0.1215	-0.2193	-0.0815	-0.1492	-0.3355	0.159	-0.0542	-0.3848
105822	0.4118	-0.2253	0.0515	0.3209	0.165	-0.2529	-0.1445	-0.8668	0.7579	-0.7178	-0.0557	0.2993	-0.1982	0.2028	-1.2016	0.1442	0.1545	-0.7669	-0.104	0.2467	-0.8233	0.1084	1.0743	0.7874	-0.4613	0.78	0.396	-1.4769	0.2005	-0.4525	0.4974	0.2246	-0.0992	0.7073	0.39	0.7526	0.0936	0.7146	0.5602	0.1121	-0.4299	0.4627	-0.6036	-0.6631	-0.8928	0.2918	1.153	-0.2121	0.3821
105835	-0.2101	-0.1589	0.1664	-0.0165	-0.1101	-0.0989	0.156	-0.4796	-0.3476	-0.0765	0.2097	0.0545	-0.0546	0.3028	0.1692	0.0287	0.0334	-0.2752	-0.2044	-0.1675	-0.0932	0.1036	0.0538	0.1768	-0.0639	-0.1764	0.0129	0.9545	0.5036	0.243	0.1329	0.4368	0.3219	0.3579	0.019	0.1768	-0.2566	0.1717	0.1627	0.1743	0.054	0.0369	-0.1123	0.3371	-0.2502	0.3533	0.2269	0.1332	0.5118
105864	0.2134	-0.5379	-0.3364	0.0796	-0.1011	0.0476	0.2747	-0.2845	-0.2321	0.0418	-0.019	0.0639	-0.3224	0.1641	0.1214	0.2797	-0.0388	-0.5169	0.1575	0.1598	-0.0598	0.2827	0.2121	0.2452	0.1549	0.476	0.0363	-0.2605	0.1341	-0.1291	-0.1729	-0.048	0.1459	-0.029	-0.1203	-0.0705	-0.0029	0.5529	0.385	-0.0546	-0.4175	0.5381	-0.1225	0.0053	0.0852	0.4877	0.2329	-0.1468	0.3203
105868	-0.0253	0.3336	-0.4712	-0.2875	-0.5267	0.4797	-0.1241	-0.1121	0.2156	0.282	-0.0092	0.5424	0.0223	0.0157	0.6271	-0.0816	0.6593	-0.8716	0.1863	-0.6662	0.3843	-0.3064	0.1318	0.5054	-0.0442	0.4525	0.0607	0.1892	0.3617	-0.483	-0.1417	-0.3955	0.1176	0.3545	-0.0217	-0.4526	0.0644	0.7885	0.4311	0.2622	-1.4233	0.5395	-0.1236	0.4153	-0.3275	0.5404	0.3893	-0.3572	1.1096
105869	0.6953	-0.0331	-0.3876	-0.0046	0.2265	0.4726	0.7694	0.7267	0.326	0.8274	-0.2323	-0.4249	-0.1022	0.0383	0.6165	0.368	0.4254	0.0124	0.6401	0.1701	0.3103	0.0543	0.3256	0.2026	0.5293	0.3791	-0.1207	0.0323	-0.3599	-0.313	0.0122	-0.5386	0.2238	-0.4655	-0.3202	-0.8887	0.5493	0.0942	0.2069	-0.1573	-0.1166	0.3335	0.2495	0.427	0.0224	1.0199	0.2103	-0.0494	0.0065
105924	0.3789	-0.1777	-0.1036	-0.1696	-0.1963	0.5822	0.0723	-0.1882	0.161	0.1196	-0.1719	0.0011	-0.4635	0.0983	0.1064	-0.1352	0.0295	-0.3098	-0.3362	-0.2671	-0.1204	0.2703	-0.0734	0.2001	0.294	0.3159	-0.0917	0.1809	0.5627	-0.1106	0.4838	-0.1392	0.3933	-0.1759	-0.539	-0.1276	0.2222	0.3181	-0.1014	-0.2149	-0.2617	0.2645	0.0715	0.1007	0.4659	0.241	-0.2298	-0.3274	0.4707
105931	0.0732	-0.2883	-0.125	-0.2344	0.0212	0.2278	0.0892	0.6782	-0.4098	-0.2306	0.0819	0.1767	0.0164	-0.0942	0.023	-0.2142	0.291	0.0004	0.1697	0.1208	0.2297	0.0626	0.2343	0.5021	-0.1344	0.3331	0.1435	0.1235	0.2966	0.1444	-0.0089	0.3049	0.0529	0.1732	0.0798	-0.0767	-0.2177	0.7165	-0.1491	0.0404	0.1832	0.4198	0.175	0.2232	0.6613	0.7963	0.2703	0.0379	1.1524
105933	0.0535	0.5993	0.4523	0.2734	-0.0048	-0.2826	0.0321	0.055	0.001	-0.4004	-0.1985	-0.0224	-0.0544	-0.0694	-0.1671	0.232	0.1934	-0.0193	-0.2019	-0.2687	0.2557	-0.0083	-0.2537	-0.1624	0.0016	-0.3965	0.0635	-0.1411	0.0951	0.3051	-0.2709	-0.0406	0.032	0.2236	0.0804	0.1782	0.1058	0.0275	-0.1749	-0.0869	0.2023	-0.3243	-0.273	-0.0929	-0.0603	-0.2279	-0.287	0.0817	-0.5258
105937	-0.0656	0.0331	-0.1886	-0.0963	-0.3093	0.4505	0.0241	0.3017	0.0446	0.2782	0.0014	0.1446	0.0092	0.0824	-0.4269	-0.3872	-0.1727	-0.1799	-0.0642	0.0454	-0.2134	0.0132	-0.015	0.0839	-0.3628	0.3419	-0.0778	0.1715	0.2898	-0.2488	0.1749	0.0301	0.0008	-0.1154	0.0205	0.2902	-0.0539	0.4627	0.3156	0.0484	-0.3627	0.4265	-0.1369	0.2475	-0.1243	0.3253	-0.0256	-0.276	0.1225
105950	-0.0092	0.3808	-0.2162	-0.1488	0.2159	0.3691	-0.0698	-0.0443	0.01	0.041	-0.1831	0.125	-0.6141	-0.1274	0.1152	0.0706	-0.2272	-0.0167	0.0442	-0.002	-0.3289	-0.2633	-0.2699	-0.0487	0.0603	-0.1201	-0.2545	0.0258	0.0257	0.1643	-0.9842	0.2	0.1894	-0.2362	-0.1011	0.1825	-0.0107	0.1796	0.6752	0.1517	-0.2303	0.1747	-0.5837	-0.048	0.169	0.0191	-0.0809	0.0389	-0.2764
105954	-0.2608	-0.2282	-0.3543	-0.3396	0.1162	0.0256	-0.1052	-0.4477	-0.0339	-0.1979	-0.1286	0.0384	-0.1406	0.2385	0.0105	-0.215	-0.469	-0.3614	-0.0897	0.2348	-0.3311	0.3308	0.0795	-0.0736	0.0707	0.2577	0.2833	-0.0191	0.3412	-0.1149	-0.0943	0.1814	0.423	-0.0347	0.0883	0.0935	-0.1382	0.5044	-0.2881	0.0104	-0.0352	-0.0548	0.0526	0.0998	-0.0947	0.198	0.0968	0.2542	0.3354
105959	0.5076	0.1301	0.4915	-0.196	-0.5196	0.3525	-0.2489	-0.0159	0.1346	0.1278	0.2255	-0.1661	0.0356	-0.0337	-0.1271	-0.2088	-0.0604	-0.0541	-0.1612	-0.4317	-0.3974	0.1756	-0.0239	-0.1305	-0.2623	0.1598	-0.1234	0.0601	-0.0038	-0.0236	0.2837	0.0703	-0.1549	-0.1763	-0.2404	0.8018	-0.1999	0.285	-0.4189	-0.0425	-0.2654	0.044	-0.0875	0.0728	-0.1062	-0.0094	-0.2371	-0.2999	1.0168
105963	-0.4884	-0.3161	-0.6942	0.1325	-0.1978	0.2963	0.0226	0.4739	0.0595	0.5381	-0.435	0.0266	-0.2689	-0.3334	-0.1148	-0.4315	0.2493	-0.2338	0.3486	0.1487	-0.4705	-0.1765	-0.2909	-0.1092	-0.3376	0.2375	-0.2763	0.1694	0.1183	-0.2732	-0.3563	-0.1716	0.2819	-0.3755	0.2644	-0.5015	0.4989	0.2305	0.3528	-0.431	-0.3944	0.359	-0.2065	0.1556	-0.4821	-0.1927	0.098	-0.4593	0.3159
105973	-0.5857	-0.5874	-0.6519	0.0932	-0.1696	0.3059	-0.1115	0.6159	0.1871	0.6998	-0.2516	0.063	-0.1538	-0.3107	-0.0366	-0.4691	0.3214	-0.0843	0.5919	0.2706	-0.4709	-0.4549	-0.5211	-0.1938	-0.5664	0.1855	-0.3996	0.2208	0.4301	-0.4717	-0.3877	-0.3017	0.1087	-0.5045	0.1046	-0.5572	0.6273	0.4006	0.5369	-0.3827	-0.2817	0.4509	-0.0441	0.0382	-0.7797	-0.2421	0.0876	-0.2142	0.199
105974	-0.6943	-0.6136	-0.6335	0.1259	-0.1384	0.3252	-0.0426	0.4182	-0.0903	0.4889	-0.0245	-0.0612	-0.0247	-0.1026	-0.1135	-0.4911	-0.1729	0.1595	0.3199	-0.0228	-0.4768	-0.4466	-0.2146	-0.2593	-0.5139	0.1791	-0.1562	-0.221	-0.5413	-0.4265	-0.3928	-0.1355	-0.0029	-0.4888	0.1234	-0.6896	0.5258	0.0846	0.1957	-0.3616	-0.3372	0.0672	0.1048	0.2373	-0.6348	-0.13	0.2232	-0.3031	-0.1103
105979	0.0531	-0.5694	-0.3849	-0.0494	0.3739	0.1165	0.29	0.1144	0.0764	0.129	-0.1024	0.1288	0.1178	-0.1338	0.0005	-0.1938	0.3673	0.3289	0.238	0.1632	-0.0864	-0.2213	-0.0576	0.0654	0.0403	0.0999	-0.1627	0.2952	-0.233	-0.0255	0.0817	0.0484	-0.2318	-0.2113	-0.0599	-0.3119	-0.1167	0.5539	0.4166	-0.1506	0.014	0.5522	0.526	0.1289	-0.4065	0.3658	0.3784	-0.1056	0.4085
105982	-0.1319	-0.3529	0.3206	0.6056	0.041	-0.1296	0.1514	0.259	-0.1768	0.2385	0.0921	0.5023	0.8115	0.3112	0.0777	-0.0971	0.0581	0.5363	0.5715	0.0247	0.0405	0.1365	0.0005	0.5571	0.2411	0.0484	0.1351	0.295	-0.1027	0.2928	0.2521	0.4773	0.2557	-0.0574	0.1571	-0.1649	0.0061	0.1141	-0.409	-0.0282	1.0381	-0.2358	0.0975	0.2596	0.0368	0.142	0.7965	0.1496	-0.3824
105984	-0.0793	0.0727	-0.7101	-0.3914	-0.1133	-0.092	-0.1466	1.0502	0.7625	1.0624	0.0319	-0.4273	-0.1496	-0.378	-0.1194	-0.5436	-0.0587	0.4807	0.0915	0.7329	-0.246	-0.1624	-0.2462	-0.3178	0.1699	0.3027	-0.3169	0.3365	0.4667	-1.1898	0.4673	-0.8058	-0.3305	-0.2546	0.2993	-0.3887	0.8047	0.2262	0.4374	-0.0054	-0.336	0.3719	0.2239	0.4001	-0.2899	-0.8216	0.0032	-0.3097	0.1352
105988	-0.6693	-0.0789	-0.1793	0.0439	-0.1922	0.2275	0.0361	-0.4941	-0.5713	-0.0823	0.5178	0.2701	-0.0353	-0.0524	0.045	-0.3441	-0.0109	-0.409	0.2708	-0.0984	-0.2293	0.0616	-0.0152	0.2478	-0.1223	0.2108	0.2837	0.4785	0.1369	0.3205	-0.0114	0.422	0.4363	0.1686	-0.1776	-0.1466	-0.1354	0.4759	-0.0693	0.0585	-0.164	0.0954	-0.1198	0.5117	-0.2149	0.4038	0.2857	-0.0394	0.3441
106005	-0.3154	-0.2092	-0.6394	0.3764	0.015	0.4202	0.0966	0.7249	0.0333	0.8601	-0.0065	-0.0961	0.1227	-0.2389	0.3804	-0.5757	0.0122	0.0805	0.2485	-0.0557	-0.405	-0.4243	-0.4439	-0.261	-0.2401	0.1818	-0.389	0.0567	-0.3581	-0.1463	-0.4371	-0.371	-0.1525	-0.5703	0.1503	-0.4675	0.4369	-0.1001	0.5193	-0.2427	-0.4734	0.3285	-0.1078	0.2711	-0.4635	-0.0782	0.162	-0.071	0.0277
106007	-0.4145	-0.1868	-0.4317	0.2576	-0.0754	0.5448	-0.0623	0.1808	-0.0286	0.5974	-0.1215	0.1254	-0.2007	-0.3499	0.5404	-0.512	0.2202	-0.1921	0.5031	-0.1594	-0.3053	-0.1884	-0.4818	-0.2457	-0.3291	0.0063	-0.1062	0.3368	0.2766	-0.0446	-0.6462	0.0076	0.2316	-0.4607	0.1389	-0.0634	0.6114	0.4691	0.5083	-0.5019	-0.4298	0.2476	-0.2302	0.1243	-0.5143	-0.0333	-0.0114	-0.261	0.8035
106012	0.0196	0.2811	0.1567	-0.0249	0.3834	-0.2626	0.6366	0.4558	0.1079	0.1924	-0.6583	-0.0979	-0.2434	-0.2062	0.5276	-0.1792	-0.4823	0.354	0.2261	-0.1699	0.1039	0.1554	-0.0328	-0.6279	-0.085	-0.2069	-0.1819	0.0914	0.1174	-0.1844	-0.3906	0.1214	0.1278	-0.0211	-0.1355	-0.5451	0.1339	0.2173	0.4673	-0.1542	-0.3164	0.0227	0.1874	0.4694	0.1466	0.7741	0.3085	-0.3752	-0.34
106014	-0.1308	0.4706	-0.3035	0.5172	-0.3672	0.1491	-0.0134	-0.5315	-0.2271	0.0743	0.2256	0.1038	-0.401	-0.2198	0.2033	0.0013	-0.1129	-0.2103	0.1544	0.2339	0.1424	0.1986	-0.3073	0.2243	-0.0803	-0.1721	0.152	0.3301	0.6744	0.1994	-0.0292	-0.0308	0.0022	-0.0111	-0.1617	0.3784	0.1982	0.6134	-0.0256	-0.2885	0.142	0.1969	0.0054	0.0062	0.206	-0.2972	-0.5533	0.0219	0.4744
106015	-0.2314	0.0457	0.0893	0.0757	0.0986	0.0485	0.0733	0.0744	-0.0523	0.0443	0.2852	0.3367	-0.0932	-0.1232	0.0308	-0.1728	-0.4422	-0.1797	0.162	-0.2823	-0.0647	0.2323	0.0902	-0.1497	-0.0446	0.0459	-0.0842	0.3386	0.2848	-0.0341	0.0078	0.0129	0.2209	-0.1084	0.0389	0.1875	0.1615	0.2053	0.1622	0.0234	-0.2038	0.1563	-0.1086	0.2562	0.0727	0.0133	-0.0455	0.1057	0.4592
106022	-0.1711	-0.1092	-0.8126	0.1789	0.1804	0.3966	0.0868	0.4223	0.1622	0.4722	0.0932	0.1818	0.0775	-0.1665	-0.1583	-0.077	-0.1694	0.2565	0.4309	0.2516	-0.2275	-0.0711	-0.3571	-0.1018	-0.305	0.0469	-0.1033	0.2823	0.2486	-0.3728	-0.509	0.0749	-0.1068	-0.2736	0.1699	-0.312	0.4234	0.4428	0.4598	-0.4146	-0.1644	0.3508	-0.1501	-0.0556	-0.3963	0.1252	0.1289	-0.1111	0.1216
106052	-0.1183	-0.0339	0.6461	0.0107	0.1692	-0.7668	0.0536	-0.1663	-0.443	-0.3883	-0.0689	-0.2624	0.2726	0.32	0.2292	0.213	-0.5998	-0.299	-0.3829	0.3864	0.2687	-0.1011	0.1337	0.1482	0.4551	-0.2789	-0.0135	-0.6404	-0.808	0.3388	0.1565	0.2916	-0.5296	0.1719	0.0188	-0.0054	-0.077	-0.3732	-0.7042	0.2741	0.4669	-0.9345	0.1877	-0.299	-0.0756	-0.0758	0.1125	-0.093	-0.8253
106064	-0.1274	0.0799	-0.7238	-0.4755	-0.1568	-0.1251	-0.1078	0.9426	0.5757	0.9889	0.1358	-0.5415	0.0198	-0.0986	0.0483	-0.5219	-0.2262	0.636	-0.0662	0.6799	-0.1245	-0.1614	0.0142	-0.2171	0.2981	0.3945	-0.3639	-0.0207	-0.4204	-1.0986	0.6295	-0.7944	-0.2995	-0.1908	0.2964	-0.5601	0.6096	-0.1636	0.4359	0.0755	-0.354	0.2141	0.3342	0.2453	-0.2165	-0.9552	0.1417	-0.3325	-0.2218
106067	0.1327	0.3338	0.6969	-0.1181	-0.2321	-0.0084	-0.2806	-0.0826	-0.0966	-0.113	-0.3103	0.2323	0.0262	0.3525	-0.097	-0.0379	-0.3547	-0.0518	-0.1127	0.0071	0.1696	0.2023	0.1922	0.1355	-0.0631	0.028	0.2119	0.3133	0.7317	0.1146	-0.4939	0.265	-0.1832	-0.0059	-0.0715	-0.066	-0.0895	0.7533	-0.2016	0.0576	-0.1084	0.3996	-0.024	-0.0023	0.0192	0.3728	-0.0334	-0.1503	0.3267
106094	1.1491	-0.637	0.1482	-0.2001	0.258	0.1727	0.0864	0.6285	0.2899	1.6186	-0.6366	-0.7277	-0.3436	-0.0942	0.5588	0.6361	0.3704	0.5117	0.165	0.739	0.5681	-0.3015	0.3342	0.2973	1.0173	0.013	0.0393	-0.097	0.111	-0.6922	0.5476	-0.1527	-0.0922	-0.3759	-0.4389	-0.4547	0.5214	-0.1031	0.4022	-0.0938	0.0735	0.4707	0.3561	0.434	0.276	0.7369	-0.7132	-0.2283	0.0696
106095	-0.2943	-0.3699	-0.6634	0.0482	-0.047	0.4006	0.1455	0.1476	-0.0338	0.1372	0.3706	0.2161	0.054	-0.0144	-0.3319	-0.2749	-0.1836	-0.1011	0.2096	0.0623	-0.4342	-0.0233	-0.2148	-0.0178	-0.2487	0.2612	0.1089	0.1768	-0.0264	-0.1057	0.0437	0.2017	0.1352	-0.0244	0.2602	-0.1586	-0.0935	0.3517	0.299	-0.0035	-0.5447	0.3704	-0.1368	0.1703	-0.098	0.1114	0.1083	-0.2065	0.1697
106096	0.4544	-0.0326	0.4019	-0.279	0.0797	0.4202	0.3573	0.1102	0.2331	0.4588	0.0387	0.0187	-0.1054	0.0774	-0.1773	0.6705	0.0949	0.0193	0.17	0.0628	0.4053	0.3894	0.5895	0.4123	0.6695	0.6949	0.1488	0.3437	0.5587	-0.2399	0.8374	0.0823	0.0164	-0.1795	-0.6366	-0.1678	-0.0812	0.3159	0.2855	0.0557	-0.1804	0.2608	0.0804	0.3247	0.1388	0.5887	0.1092	0.1038	-0.1554
106111	-0.2545	-0.4318	-0.5234	0.2449	0.1717	0.0498	0.0332	0.4687	-0.1014	0.4059	0.0482	-0.2092	0.1262	-0.0601	0.4579	-0.33	-0.2751	0.2312	0.2224	-0.0549	-0.2631	-0.1582	-0.2646	-0.2844	-0.0577	0.0988	-0.2212	-0.356	-1.4295	-0.1391	-0.3511	-0.3816	0.0359	-0.6768	0.3332	-0.4126	0.7072	-0.6792	0.4411	-0.3311	-0.0044	-0.0499	-0.1881	-0.0566	-0.1265	-0.3441	0.0393	-0.1127	-0.3618
106122	0.3561	-0.2402	-0.1889	0.3181	-0.2963	0.2995	0.6199	0.0821	-0.0975	0.3179	-0.0256	0.1936	-0.1294	0.2576	0.4006	0.0182	-0.5775	-0.3892	-0.2717	0.1588	-0.5341	0.3488	-0.0518	-0.138	-0.0607	0.2917	0.5961	-0.4573	-1.693	0.2357	0.2198	-0.1644	0.013	0.0945	-0.2842	0.2675	0.2189	0.1336	0.445	0.3643	-0.3177	0.6226	0.1858	-0.1407	-0.1548	0.7397	0.1422	0.2657	0.0845
106128	0.5067	2.1847	-1.8552	-0.7251	0.2476	1.7999	-0.9636	0.7493	2.9377	0.2005	-0.6679	-0.7464	-0.9892	-0.0456	-0.8778	-0.0246	1.2172	0.8792	-1.8303	0.2102	-0.3476	-0.8484	-0.6155	0.5978	1.2768	-0.3547	-0.8557	1.5485	0.355	1.2699	1.4402	-0.2238	2.6336	-0.3512	-0.6783	0.6489	-0.4442	-0.6911	-0.9445	-0.0825	-0.1918	1.0909	-0.8119	-0.1328	0.4582	0.0653	-0.4552	0.5038	-0.2197
106136	0.0065	0.1962	0.0287	-0.1081	-0.3019	0.4449	0.3517	0.1298	0.0066	-0.0423	-0.0585	0.0235	-0.165	-0.1098	0.3171	-0.1625	0.2393	-0.0824	0.1174	-0.3227	0.1089	0.1548	0.101	0.036	-0.0163	0.1964	0.0445	0.2888	0.2329	-0.1995	0.0959	0.0643	0.1929	-0.0901	-0.2203	-0.107	0.3494	0.3169	0.276	-0.0347	-0.356	0.1518	-0.1212	0.3803	0.2156	0.6851	0.0246	-0.0821	0.5801
106164	-0.2065	-0.0319	-0.3534	-0.0294	-0.0576	0.3993	-0.1398	-0.0696	0.4002	0.2747	0.0475	0.2148	-0.1362	-0.5515	-0.1504	-0.2162	0.1698	-0.1736	-0.012	0.0943	-0.2506	0.0128	0.0317	-0.0585	-0.0686	0.1443	-0.0291	0.4836	0.7594	-0.2193	0.1753	0.0587	0.3614	-0.1438	0.1201	0.2596	0.0001	0.4773	0.4646	-0.2991	-0.5391	0.3875	-0.0897	0.2462	-0.4617	-0.0636	0.0118	-0.3359	0.6753
106167	0.0118	-0.1457	-0.5772	0.2287	0.1464	0.4252	0.0856	0.6732	0.2068	0.4491	0.1407	0.0623	-0.085	-0.2624	-0.1065	-0.277	-0.3236	0.2889	0.2376	0.1026	-0.2488	-0.2449	-0.2249	-0.2726	-0.1984	0.1985	0.0121	0.1351	0.2496	-0.5337	-0.0748	-0.4695	-0.1211	-0.228	-0.0335	-0.1453	0.3313	0.2193	0.2469	-0.1276	-0.3217	0.2836	0.1676	0.3615	0.0101	0.0846	0.144	-0.0219	0.5705
106171	-0.0489	0.2767	0.0107	0.2192	0.1134	0.2119	-0.0178	-0.009	0.0127	0.2699	0.4286	0.2385	0.0857	-0.0007	-0.1157	-0.1816	0.0867	-0.3536	0.3054	0.1637	-0.0868	0.2425	0.0384	-0.0547	0.1176	0.184	0.3732	0.3787	-0.0921	-0.0766	0.3096	0.1749	0.046	0.1306	0.0215	0.0359	-0.0605	0.331	0.6485	0.3485	-0.1915	0.1768	0.1638	0.1586	-0.1153	0.1434	0.3143	0.3084	0.4179
106172	-0.439	-0.17	-0.3816	0.1604	-0.1332	0.1851	0.1124	-0.082	-0.0194	0.3803	0.1772	0.101	-0.1062	-0.2485	0.1764	-0.3142	0.1042	-0.4913	0.1953	-0.0289	-0.3786	0.1178	-0.2562	0.103	-0.1882	0.0987	0.1718	0.3177	0.3582	0.0263	-0.236	0.1895	0.1923	-0.0882	0.1201	0.1044	0.2919	0.577	0.2496	-0.2852	-0.5064	0.3611	-0.1768	0.2162	-0.5316	-0.0238	0.0766	-0.2261	0.942
106192	0.742	0.2855	-0.3303	-0.5635	0.4639	0.4293	0.6699	0.7513	-0.1168	0.4908	-0.4479	0.1784	-0.04	0.1039	0.4439	1.1768	0.4818	0.0496	0.2223	0.3888	0.717	0.2948	0.1615	0.3665	0.8817	0.9728	0.0073	0.5526	1.0732	-0.6667	0.3087	-0.0917	-0.22	-0.043	-0.4826	-0.1571	0.3782	0.482	0.3517	0.1652	-0.2312	0.536	0.1811	0.4576	0.4224	0.8314	0.1412	0.1143	-0.3096
106201	0.5072	1.3602	0.3882	-0.0228	0.083	0.2792	-0.1586	-0.1213	-0.0488	0.3766	-0.6522	0.3277	-0.473	0.0249	-0.1111	0.2217	0.6185	0.0347	0.665	-0.266	-0.3268	-0.5993	-0.6995	0.1397	0.1763	0.6608	0.0034	-0.4398	-0.3271	-0.3169	-0.43	-0.8121	0.818	0.0978	0.0775	-0.3101	0.4695	-0.8584	0.7757	-0.8976	-0.82	-0.0372	-0.2338	0.3016	-0.3411	0.1028	0.4087	0.0968	0.0362
106202	0.1309	-0.1774	-0.0878	0.1451	0.0455	0.5303	0.4396	0.1946	-0.5014	0.0291	0.4325	0.1271	-0.0516	0.1975	0.6865	-0.1063	0.4296	0.1102	0.3925	0.3191	-0.0017	0.046	0.0075	-0.0067	0.0846	0.2069	0.2658	-0.1124	0.3052	0.3545	-0.4789	0.3154	-0.0601	-0.1381	-0.0634	-0.2896	0.0963	0.5129	0.279	0.0949	-0.4267	0.4285	-0.1886	0.462	-0.2119	0.5819	0.3898	0.2041	0.3118
106211	-0.4785	-0.1268	-0.0152	-0.196	-0.2802	0.4629	0.1043	-0.1757	0.2887	0.2909	0.0126	0.3903	0.0626	-0.0484	0.0766	0.0212	0.4317	-0.2502	0.1927	0.0146	-0.07	0.2636	0.0393	0.0458	-0.3128	0.2275	0.3225	0.3834	0.2433	0.2612	0.0805	0.3173	0.6461	0.3009	0.0044	0.1849	-0.0267	0.4362	0.3907	0.1248	-0.3854	0.3934	-0.1152	0.2509	-0.1081	0.2044	0.2547	0.1135	0.6118
106212	-0.2504	1.1303	0.5278	-0.5733	0.0886	-0.8668	-0.7939	-0.0355	0.3426	-0.5074	-0.5786	0.4071	-0.4621	-0.0917	0.0908	-0.1056	-0.3811	0.4459	0.4433	-0.2475	0.2498	-0.1062	-0.2478	-0.1205	-0.884	-1.2847	-0.5624	0.178	-0.5632	-0.207	-0.2464	-0.346	-0.1735	0.2197	0.5952	0.2325	0.0489	-1.0825	0.661	-1.0292	0.689	-0.2839	-0.3372	-0.4531	-0.0512	-0.2918	-0.3132	0.4722	-0.9345
106225	0.0771	-0.1183	-0.3609	0.2132	-0.1551	0.4548	0.4248	0.4258	-0.1981	0.4896	-0.1158	0.0664	0.0815	-0.0413	0.195	-0.149	0.4398	-0.1544	0.518	-0.1188	-0.0142	0.0514	-0.0084	-0.0353	-0.0208	0.4865	0.0385	0.3645	0.3811	-0.0733	-0.1923	0.0203	-0.0613	-0.3793	-0.0158	-0.4409	0.3064	0.5715	0.574	-0.1482	-0.4305	0.5671	0.0364	0.3598	-0.3108	0.3959	0.5108	-0.1283	0.2456
106226	-0.0861	-0.2217	-0.5039	0.2434	0.2866	-0.0791	0.0916	0.5222	0.4383	0.8372	-0.6782	0.1779	-1.0665	-0.1926	-0.1342	0.5427	0.2144	0.0707	0.1024	0.7995	-0.315	-0.2625	0.4727	0.0296	-0.0474	0.3536	0.1414	-0.3054	-0.024	-0.9555	0.0757	-0.1739	-0.0042	-0.5807	0.2974	-0.318	0.2062	0.6655	0.9153	-0.2075	-0.1434	0.7157	-0.3411	-0.5374	0.1267	0.3582	0.1803	-0.3991	0.2026
106282	-0.3264	-0.1007	-0.6946	-0.1195	-0.2026	0.0639	-0.2005	-0.3574	0.0708	-0.0402	0.6705	0.105	-0.2933	-0.0069	-0.022	-0.0554	0.2082	-0.5271	0.0936	0.0711	-0.1628	0.1775	-0.2151	0.0427	-0.0699	-0.0095	0.2274	0.2997	0.5939	0.1226	-0.319	0.17	0.4938	-0.0917	0.2412	-0.0584	-0.2329	0.4568	0.0513	-0.1611	-0.2955	0.4509	-0.0896	0.1207	0.0946	0.1203	0.1144	0.138	0.3645
106295	-0.321	0.275	1.0073	0.1019	0.5902	-1.2736	0.0212	-0.3664	-0.2077	-0.9496	0.2422	-0.3621	0.4397	-0.1221	-0.1243	0.3347	-0.1511	0.442	-0.3089	-0.722	0.4199	-0.0357	0.0382	-0.1888	0.0947	-1.5844	-0.0185	-0.4784	-1.1762	0.8633	-0.106	0.2098	-0.0592	0.5424	0.8083	0.078	-0.5984	-1.628	-0.9336	0.2244	0.8179	-1.4443	-0.127	-0.4447	0.2885	-0.6357	-0.4942	0.5247	-1.2
106304	-0.4165	-0.7649	-0.0379	-0.1208	-0.435	0.0384	-0.0939	-0.4734	-0.1478	-0.0711	0.1962	-0.2069	-0.6707	0.1704	-0.0113	-0.2988	-0.4021	0.0866	-0.1446	-0.037	-0.2646	-0.1401	-0.2531	-0.0091	-0.0486	0.0083	0.0872	0.1864	-0.1287	-0.2872	0.065	0.093	-0.3202	-1.0161	-0.0001	0.389	-0.3103	-0.0501	0.3043	-0.1786	0.152	-0.1404	-0.0008	0.305	-0.4088	-0.1457	-0.1081	-0.6557	0.2303
106311	0.2169	0.0836	-0.3051	0.2331	0.1216	0.3926	0.6389	0.8195	-0.0531	0.7264	-0.4863	0.0824	-0.0637	-0.2886	0.5223	0.0438	0.6256	0.3371	0.8268	0.2337	0.0532	0.0259	0.0328	-0.2366	0.4225	0.4163	0.1153	0.37	0.0373	-0.1404	0.008	0.0087	-0.3324	-0.5661	-0.0717	-0.978	0.234	0.7274	0.7371	-0.1329	-0.2985	0.6538	0.1172	0.2544	-0.0944	0.5386	0.2105	0.154	-0.4367
106320	0.4738	-0.5703	-0.348	0.537	0.3801	-0.3365	0.4068	-0.083	0.0223	0.3459	0.3846	0.1822	0.1373	0.0638	0.3914	0.2491	0.559	0.328	0.0955	0.4028	0.2101	0.0401	-0.1991	-0.3014	0.5859	0.3041	0.3463	0.5732	-0.0952	-0.161	-0.3252	0.0217	-0.1257	-0.0512	0.2201	-0.4041	0.3439	0.6175	0.2531	-0.2027	-0.059	0.3569	0.0694	0.3222	-0.2392	0.4392	0.131	0.2236	0.1556
106325	0.1901	-0.91	0.7298	-0.5181	-0.0078	-0.4132	0.0115	-0.4747	0.3653	0.0648	-0.471	-0.0195	-0.4941	0.5049	-0.878	-0.1887	-0.3338	-0.9083	-0.8101	-0.3259	-0.5912	0.0819	-0.0895	0.3277	0.2225	0.1927	-0.4983	0.0739	0.743	-0.4168	-0.0656	-0.0276	0.1335	-0.2687	-1.0403	0.2495	0.0718	0.1319	-0.4341	-0.2478	0.2917	0.1033	0.6622	-0.225	0.2906	0.2396	-0.1997	-0.6771	0.8588
106334	0.098	-0.2037	0.0453	0.1572	-0.1501	0.4328	0.2226	0.1281	-0.0765	0.3646	0.0629	0.1514	0.0379	0.1766	-0.1006	-0.2945	0.2616	-0.1823	0.3932	-0.0958	-0.1999	0.2079	-0.0208	0.0948	-0.0217	0.3402	0.1556	0.1338	0.1655	-0.1268	0.2163	0.077	0.2015	0.0184	0.1012	-0.2687	-0.0045	0.3042	0.126	-0.2254	-0.415	0.3264	-0.0793	0.3275	0.0032	0.1618	0.2027	-0.1158	0.258
106345	0.1312	-0.4318	-0.8134	-0.2208	-0.4167	0.0018	0.0608	-0.4779	-0.3094	0.0136	0.1258	0.1732	-0.4542	0.1842	-0.0331	-0.328	-0.3293	-0.3225	-0.1128	-0.449	-0.2818	0.0272	-0.2276	-0.086	0.0255	0.2916	0.0398	-0.2704	0.6035	0.1436	-0.5215	-0.0809	-0.2348	0.1176	-0.0898	0.1793	-0.3148	0.2132	0.0195	-0.2374	-0.008	0.1437	0.0903	0.021	-0.037	0.394	0.0591	-0.2698	0.1703
106373	-0.4354	0.1999	-0.193	0.0333	-0.2845	0.814	0.0983	0.0705	0.0573	0.2195	0.337	0.163	0.0876	-0.4564	-0.3533	-0.1653	0.2103	0.0701	0.3396	-0.3544	-0.2337	0.1429	-0.0511	-0.2696	-0.2012	0.0502	0.0199	0.2961	0.4357	0.0613	0.2791	0.0558	0.2269	-0.1736	-0.0604	-0.2286	0.0552	0.2391	0.2684	0.1928	-0.3923	0.3212	-0.1745	0.4308	0.1587	0.0305	0.0138	-0.2383	0.2824
106376	1.1534	-0.2339	0.0414	-0.0093	0.0529	0.4428	0.4699	0.5316	0.0506	0.0023	0.16	-0.5744	0.3181	0.4475	0.3245	0.1355	-0.1935	0.2447	-0.0257	0.1353	-0.4799	-0.1523	0.7418	0.1496	-0.1602	0.0201	-0.5934	-0.0057	0.0413	-0.5252	0.5302	0.0793	0.1059	-0.3719	0.6159	0.2051	0.3746	-0.3396	0.6648	-0.126	-0.2992	0.4262	-0.2415	-0.1765	0.4495	-0.0338	0.3103	-0.1319	-0.2826
106378	-0.0671	-0.2274	-1.1783	0.1338	0.4448	0.3402	-0.6935	0.1233	0.4266	0.0111	-0.1044	0.3574	-0.3616	0.1019	-0.3897	-0.5574	0.0042	-0.1634	0.5567	0.221	-0.4026	-0.0075	-0.1541	0.0279	-0.4663	0.2953	0.2742	0.2355	0.6448	-0.2055	0.1413	-0.074	-0.1178	0.5915	0.1339	-0.1081	0.2356	0.6938	0.1749	-0.5829	-0.4015	-0.2196	-0.899	0.3284	-0.9303	-0.1195	0.5618	0.3447	0.2404
106386	-0.3835	0.4824	0.4779	0.2842	-0.0789	-0.6943	0.1508	-0.5103	-0.0592	-0.4492	-0.0164	-0.2063	0.2179	-0.2612	-0.3505	-0.2143	0.2809	-0.158	-0.3946	-0.4077	0.4005	-0.183	-0.2523	-0.1855	0.061	-0.4365	0.0785	-0.2266	-0.4042	0.5324	-0.151	-0.2288	-0.0329	0.4789	0.1116	0.1277	-0.2019	-0.5059	-0.2998	-0.0386	0.2783	-0.421	-0.0923	-0.665	-0.8775	-0.5916	-0.1034	0.2448	-0.1868
106389	-0.336	-0.6971	-0.6134	0.3622	0.2809	-0.9549	-0.0584	0.6745	-0.5306	0.7567	0.1585	-0.8627	0.5801	0.4339	0.7648	-0.2066	-0.0832	0.6964	0.4781	0.5622	-0.2112	-0.0683	-0.0741	0.1555	0.2378	0.4431	-0.219	-0.9947	-0.6831	-0.7169	0.1756	-0.2505	-0.1641	-0.5778	0.8431	-0.752	0.3608	0.0265	0.2925	0.2107	-0.2722	0.1553	0.6301	-0.1354	-1.1638	-0.7886	0.7767	-0.2246	-1.3279
106409	0.5745	-0.4234	0.4525	-2.2269	-0.6549	-0.9681	-0.0687	-1.8581	-1.213	-1.6948	-1.3829	-0.0845	0.3816	-0.3385	0.0996	0.1534	-1.7465	-2.5212	-1.1952	0.4583	-1.7564	0.1437	0.0969	-1.2117	-0.2534	0.8995	-2.3677	-0.7163	-1.6179	-1.0196	-0.7828	0.3602	0.3009	-0.3092	-2.316	1.2451	-0.4753	-1.6335	0.0102	-0.3587	0.595	-0.3966	-0.6108	-1.2279	0.6325	-0.5113	0.3721	-0.5555	0.0048
106426	0.2697	0.4326	-0.09	0.0472	0.2671	0.4349	0.9597	0.4616	-0.0401	-0.0087	-0.1524	0.4347	0.1239	0.1838	0.4565	0.3505	0.431	0.2575	0.4598	0.2506	0.5238	0.2997	0.1872	-0.1638	0.3301	0.293	0.4493	0.3252	1.0324	0.0424	-0.5595	0.1971	0.0477	-0.0172	-0.3238	-0.3584	0.0922	1.0863	0.3786	0.2073	-0.1571	0.7752	0.3918	0.1682	0.2073	1.1377	0.2835	0.3764	-0.0745
106441	-0.089	0.2279	0.5607	0.0185	0.0535	-0.7199	-0.3734	-0.522	-0.4372	-0.6249	-0.1495	-0.7051	0.3662	-0.4177	-0.2955	0.1974	-0.35	-0.3211	-0.1393	-0.2907	-0.2531	0.0035	-0.1344	0.1851	-0.0518	-0.4408	0.0407	-0.5466	-0.1306	0.6475	0.4228	0.265	0.0033	0.2583	0.1161	0.2403	-0.5839	-0.4752	-0.1545	0.4404	0.2772	-0.8308	-0.353	-0.4123	-0.2133	-0.3811	-0.2689	-0.1103	-0.9878
106464	0.3444	0.2757	-0.4392	0.0861	0.496	0.4399	-0.0463	0.1301	-0.1826	0.2212	-0.3686	-0.0173	-0.0625	0.185	0.2289	0.1643	-0.6034	0.2315	0.3781	0.5731	-0.3928	-0.2456	0.4247	0.0008	0.0193	-0.063	-0.1241	-1.0967	-0.6205	0.2089	-0.8809	0.3144	0.1067	-0.2393	0.078	-0.3805	0.4211	-0.039	0.6518	0.2909	-0.2655	-0.0442	-0.4278	-0.4068	0.1482	0.2095	0.1832	-0.4121	-0.2671
106465	-0.3543	0.1344	-0.1525	-0.0067	-0.1863	0.2348	-0.0033	0.0034	0.2585	0.0336	0.1909	0.1409	0.024	0.131	-0.5288	-0.1555	0.1731	-0.1462	0.2348	0.0661	-0.1985	0.2831	-0.0719	0.3093	-0.0468	0.3087	0.2745	0.7302	0.6972	0.2558	0.2208	0.1584	0.5749	0.3119	-0.0377	0.3799	-0.0076	0.385	0.2386	0.0298	-0.296	0.4548	-0.0654	0.2518	0.0599	0.004	0.1936	0.0285	0.447
106466	-0.2463	0.4984	0.513	-0.2063	-0.0503	-0.4447	-0.2541	-0.3005	-0.0356	-0.5329	0.1546	0.0564	0.129	-0.2363	-0.1156	0.0316	0.208	-0.3243	0.0882	-0.2796	0.0815	0.1213	-0.2399	-0.1735	-0.0564	-0.4279	0.0817	0.2108	0.4918	0.5058	-0.2077	0.1793	0.1993	-0.0211	0.202	0.1969	-0.0487	0.0235	-0.1548	0.0004	0.3509	-0.3036	-0.1721	-0.1078	0.2048	-0.4797	-0.3028	0.3402	-0.1962
106478	0.0536	-0.769	0.5849	-0.6281	0.325	0.0234	0.7071	-0.8755	0.0044	-0.0649	-0.0491	-0.2577	-0.5899	0.2188	-0.2053	-0.4625	-0.8792	0.4313	-0.6066	-0.9801	-0.3026	-0.5476	-0.7309	0.3586	0.3879	0.8006	-0.3341	-0.2332	-0.3726	-0.6049	0.5835	-0.3211	-0.4327	-0.2645	-0.4241	-0.9772	-0.3581	-0.4724	-0.0738	-0.0624	-0.443	0.031	0.1326	0.0075	0.4493	0.0766	0.0461	-0.9458	0.4105
106486	0.3344	-0.1491	-0.6149	-0.0837	-0.0226	0.1877	0.222	-0.267	-0.0768	0.0431	-0.2064	-0.0535	-0.6077	0.3367	0.2266	0.1561	-0.244	-0.46	-0.3529	-0.1866	-0.3995	0.0856	0.1656	-0.0093	-0.1075	0.3111	-0.0259	-0.1436	-0.4533	-0.1789	-0.0002	0.0805	0.0836	-0.0933	-0.1804	-0.1828	-0.1357	0.4426	0.0907	-0.1158	-0.321	0.2459	-0.2004	-0.1801	0.1688	0.6926	0.0669	-0.1059	0.2662
106502	-0.7559	0.8798	0.2008	-0.106	0.8929	-0.1146	1.0192	-0.1147	0.9554	-0.7148	0.1001	1.1173	0.2444	0.1516	-1.2248	0.7198	-0.4128	-0.828	-0.6542	0.1202	0.5456	1.3796	0.4411	-0.6524	0.1694	0.2741	0.8479	1.0802	1.3644	0.2524	-0.6682	0.8954	0.2927	1.1394	-0.2528	0.9377	-0.3919	1.3657	1.3003	0.6	0.5228	0.6006	1.4702	-0.9319	0.5453	1.519	0.4105	0.8211	-0.1509
106517	-0.0037	-0.1727	0.453	-0.1447	0.1361	-0.469	-0.1326	-0.1252	-0.6509	-1.0184	0.2934	-0.6499	-0.1087	0.4304	0.0416	0.0542	-0.7186	-0.2127	-1.0927	0.1185	0.4114	-0.0516	-0.1054	0.2178	0.0303	-0.0955	0.1235	-0.7044	-0.3321	0.6958	-0.2796	0.2608	0.0083	-0.2217	0.1052	0.3343	-1.133	-0.5313	-0.7134	0.2556	0.2467	-0.3969	0.3507	-0.9769	-0.2867	-0.1628	-0.0202	-0.4502	-1.0066
106552	0.5824	0.2416	-0.3644	-0.045	0.4161	0.6043	0.8045	0.5943	0.13	0.3861	0.4697	0.0858	0.1625	0.2196	0.5137	0.2983	0.4306	0.3426	0.1569	0.4669	0.4894	0.5344	0.0663	0.3662	0.7255	0.016	0.2405	0.3657	0.4392	-0.1034	0.321	0.3197	0.2568	0.0132	-0.2348	-0.1331	0.4857	0.892	0.5714	-0.3039	-0.1816	0.4817	0.2845	0.7315	0.1513	0.5918	0.2758	0.3261	0.0811
106571	-0.3147	0.3596	0.3312	0.5551	-0.4017	-0.2012	-0.3792	-0.3196	-0.3867	-0.8086	-0.2653	0.3722	-0.1112	-0.2762	-0.1221	-0.7873	0.8122	-0.6516	0.1732	0.165	0.2131	-0.1742	-0.4895	-0.3679	0.2045	0.0414	0.3794	0.1621	-0.3773	-0.0051	-0.4491	-0.3111	0.2305	0.6668	0.0037	-0.2878	0.4484	-0.4824	-0.3626	-0.5778	-0.0074	-0.7134	-0.0856	-0.0476	-0.1161	-0.1118	-0.2115	0.2022	0.1884
106600	-0.0402	0.362	-0.2503	0.002	-0.5068	0.2767	-0.6755	-0.3799	-0.2708	-0.2774	-0.1575	0.0186	-0.0795	-0.0542	-0.6363	-0.3295	0.0614	-0.1506	1.3486	-0.5361	0.1706	-0.4381	-0.5914	-0.1972	-0.0826	-0.4259	-0.4378	-0.4045	-0.3486	0.4766	0.3762	0.0317	0.4243	-0.0587	0.007	-0.3038	-0.17	-0.2766	0.5683	-0.2373	-0.222	-0.3897	-0.4042	-0.2236	-0.0811	-0.3029	0.0386	-0.2654	-0.0945
106601	0.5929	-1.2543	-0.5513	0.0273	0.405	0.1321	0.1298	0.1818	0.3732	0.879	-0.5484	-0.0774	-0.0378	-0.1951	-0.0357	0.5289	-0.2961	0.093	0.35	0.3627	0.0969	-0.2865	0.2573	-0.2078	0.532	0.4559	-0.2745	-0.3979	0.3534	-0.9177	0.2175	-0.1238	0.0724	-0.2411	0.3333	-0.1739	0.5669	0.6451	0.9619	0.2228	-0.2227	0.8316	-0.0422	-0.042	-0.0362	0.5381	0.1506	-0.3906	0.4429
106626	0.1521	-0.3771	-0.1636	-0.2673	0.0479	0.3415	0.2073	-0.1808	-0.2326	0.1054	-0.1447	0.2493	-0.4172	0.1903	0.5619	0.4679	0.6605	-0.1656	0.5371	0.5948	-0.2969	-0.2663	0.0866	-0.1555	0.1285	0.5127	-0.0774	-0.0179	-0.326	-0.374	0.0351	-0.2821	-0.2036	-0.0424	-0.3801	-0.2364	0.2217	0.1263	0.2688	-0.0449	-0.0699	0.3127	-0.2203	-0.0008	0.0879	0.0938	0.1597	0.2595	0.5116
106637	0.3288	-0.3903	-0.7921	-0.1273	-0.0508	0.7617	-0.1429	1.13	0.3531	0.4942	0.0004	0.4492	0.1205	0.2144	0.2944	-0.2154	0.499	-0.2218	0.3254	0.4739	-0.5334	-0.1514	0.1881	-0.0206	0.0373	0.1032	0.1613	0.5415	0.1507	-0.0322	0.3515	0.3727	0.0453	-0.2756	-0.0109	0.0187	0.1348	1.1119	0.7831	-0.2143	-0.5284	0.3615	-0.2519	0.4818	0.0363	0.5151	0.2934	-0.3941	0.4367
106672	-0.0258	-0.2752	-0.4324	0.032	0.0291	0.2882	0.5019	0.4052	0.2547	0.1576	0.1791	0.3067	0.4268	0.0364	0.2553	-0.1879	0.0484	-0.1174	0.1093	-0.4314	-0.171	0.0449	0.2172	0.2277	0.0311	0.1214	0.1238	-0.0532	-0.6891	-0.0384	0.5218	0.1937	0.1778	-0.0364	0.1397	-0.0068	0.2395	0.1833	0.4476	-0.1409	-0.3409	0.2067	-0.1559	0.3854	-0.161	0.4109	0.1236	-0.1075	0.1038
106712	0.0293	-0.117	-0.0906	0.1128	-0.1276	0.1972	0.1774	0.224	0.1874	0.2855	0.1935	0.2811	0.2776	-0.0198	-0.0724	-0.0952	0.0577	-0.2285	0.025	0.2387	-0.1295	0.075	0.039	0.1322	-0.087	0.2053	0.2168	0.3797	0.5375	-0.1008	0.2401	0.1793	0.2449	0.0159	-0.1639	-0.0968	0.0982	0.5651	0.2672	0.0462	-0.1899	0.288	-0.0398	0.2316	-0.1655	0.07	0.0441	0.0233	0.3759
106722	0.311	-0.5254	-0.0908	-0.3023	0.1094	0.1787	0.0548	0.2149	0.3391	0.4516	-0.0424	-0.2374	-0.0877	0.0412	0.022	0.0074	0.0617	0.3063	0.2197	0.4321	0.0709	0.0176	0.1676	0.1194	0.3992	0.1834	0.212	0.2929	0.6689	-0.2874	0.1413	0.1765	-0.2098	-0.1684	-0.1141	-0.4678	-0.0608	0.6958	0.1955	0.0359	-0.0853	0.4199	0.1413	0.1939	0.1276	0.3362	-0.0357	-0.0888	-0.0275
106723	0.6861	0.0158	0.1329	-0.3483	-0.0095	0.4631	0.1411	0.805	0.6107	0.9536	-0.2756	0.1439	-0.1248	-0.2068	0.2594	-0.0725	0.2223	-0.0649	0.4294	0.2575	-0.0364	-0.0501	0.2881	-0.1389	-0.0054	0.3423	-0.4186	0.2699	0.3359	-0.8478	0.2852	-0.6302	-0.3877	-0.3927	-0.3016	-0.1791	0.3646	0.4148	0.5068	-0.1898	-0.2513	0.3966	0.1486	0.4952	-0.0161	0.134	-0.0511	0.1918	0.442
106768	-0.4786	-0.5534	-1.2285	-0.2969	-0.0631	-0.0199	-0.4465	2.0479	1.1035	2.0573	-0.3256	-0.112	0.0981	-0.2723	0.4992	-0.3835	0.3588	0.8573	1.208	1.0218	-0.1935	-0.808	0.0539	-0.119	-0.2931	0.4629	-1.1885	0.4757	-0.5386	-1.3938	-0.1305	-1.1387	-0.0604	-0.8005	0.355	-0.7096	1.2045	0.0328	0.655	-0.6167	-0.2184	0.7026	0.6295	0.5171	-0.8797	-0.7564	0.0283	-0.4376	-0.0872
106774	0.3211	-0.4346	0.1865	-0.1494	-0.1358	0.4895	-0.0002	-0.4316	-0.0173	-0.2139	-0.2509	-0.2107	-0.1215	-0.1256	-0.5107	-0.0318	-0.3583	-0.578	-0.3676	0.0594	0.0003	0.0722	-0.0526	0.4159	-0.0591	0.3394	-0.2264	-0.0864	0.3065	-0.2103	0.1562	0.1508	0.1502	-0.0157	-0.3148	-0.082	-0.1397	0.3187	-0.365	-0.046	-0.2107	0.0435	0.1346	0.04	0.1107	0.0883	-0.3241	-0.4755	0.5288
106777	0.2229	0.1553	-0.2346	0.009	0.0408	0.5866	-0.0986	0.7162	0.3308	0.8442	-0.5541	-0.0875	0.0246	-0.2128	-0.3874	-0.1812	0.3235	-0.3491	0.7245	0.2481	-0.1184	0.0147	-0.153	0.0249	-0.0335	0.1215	-0.0508	0.5499	0.3023	-0.5463	0.4167	-0.301	-0.2493	-0.3865	0.0823	-0.444	-0.2336	0.2594	0.3234	0.0797	0.1043	0.1634	0.1382	0.1239	-0.098	-0.1098	-0.0879	-0.2272	0.006
106787	0.5697	0.1533	-0.4984	-0.1789	0.3302	0.3595	-0.0323	0.1765	0.2302	0.5841	-0.6439	-0.1487	-0.5664	-0.126	0.3904	0.2879	-0.0407	-0.2597	0.0228	0.6473	0.169	-0.1339	0.0587	-0.0116	0.4204	0.2593	-0.1847	-0.1353	0.1142	-0.3749	0.3073	-0.2126	0.3958	-0.4248	-0.3622	-0.3259	0.0246	0.1722	0.3821	0.1242	0.0124	0.2988	-0.294	-0.3445	0.1611	0.2861	0.0499	-0.4181	0.2106
106788	0.0432	-0.442	-0.0366	-0.4336	0.336	0.3247	-0.0407	0.2655	-0.3976	0.897	-0.0837	-0.3391	-0.2323	-0.0161	0.3526	0.2151	-0.554	1.029	0.0249	-0.6479	0.029	-0.196	0.1151	0.332	0.083	0.3319	-0.0139	0.1232	-0.1762	-0.2683	-0.1156	0.2545	-0.5517	-0.1534	-0.2787	-0.4622	-0.0379	0.0691	0.0184	-0.2885	-0.3305	0.5495	0.1526	0.5143	0.1326	0.3704	0.0449	-0.4397	0.0283
106796	1.0373	0.0034	0.017	-0.2799	0.0224	0.5253	0.7854	0.337	0.0851	0.0636	-0.5129	-0.0109	-0.2704	0.3566	0.129	0.293	0.1185	0.0211	0.0892	-0.0954	0.2957	0.199	0.1474	0.2141	0.5708	0.5219	0.0525	-0.2282	0.3392	0.0045	0.0335	0.0512	-0.4982	-0.5575	-0.8985	-0.5494	0.3196	0.509	-0.2852	0.0232	-0.2514	0.1502	0.3791	0.4023	0.6071	1.0303	-0.2776	-0.3844	0.0336
106809	0.0983	-0.2392	-0.5464	0.1484	-0.2705	0.1949	0.2111	0.4057	0.0188	0.4258	-0.2651	0.0997	0.0732	-0.139	0.341	-0.0757	0.4368	-0.0534	1.118	-0.3195	0.1965	-0.2295	0.0974	-0.2481	0.3116	0.4127	0.4291	0.5303	0.1278	-0.1777	-0.2317	-0.2881	-0.1565	-0.2322	0.0166	-0.2681	0.3848	0.368	0.6095	-0.2048	-0.3178	0.6117	-0.2353	0.4476	0.0817	0.4805	0.1693	0.1112	0.1992
106839	0.4017	0.0208	0.0449	-0.1773	0.0685	-0.2423	0.0159	-0.5604	-0.5924	-0.292	-0.3839	-0.3002	-0.2844	0.4238	0.36	0.1426	-0.244	-0.2038	-0.3246	-0.4743	0.1269	0.0588	0.2599	0.573	0.4672	0.4072	-0.1054	-0.4836	-0.2654	-0.0775	0.1846	-0.0472	0.3072	-0.0801	-0.216	-0.0366	0.048	-0.4122	-0.1112	-0.0814	0.1141	-0.2588	0.1355	0.157	0.4333	0.3712	-0.1552	-0.0784	-0.1577
106846	-0.0502	0.7184	-0.4164	0.5499	0.4712	-1.1291	-0.3263	0.5477	-0.238	0.0095	0.2537	0.4384	-0.4483	0.2036	-2.0881	0.3989	0.532	1.0604	0.2966	0.2888	-0.4821	-0.1459	0.1187	-0.3594	-0.7536	-0.8268	-0.3082	-0.0696	-1.2268	0.3573	-0.1771	0.0479	-0.1876	-0.2031	-0.1818	0.726	0.3323	-0.9529	-0.1164	0.1864	0.9244	-0.6221	0.1752	-0.6618	0.4795	-0.9192	-0.6652	0.2226	-0.2449
106874	0.7587	-0.2135	-0.396	0.0707	0.243	0.351	0.4397	0.92	0.525	1.145	-0.6703	-0.3831	-0.0295	-0.2873	0.5046	0.3744	0.6538	0.4122	0.8538	0.5548	0.4509	-0.1386	0.2768	-0.1672	0.7009	0.5952	-0.0576	0.0446	0.374	-0.7373	0.0239	-0.1905	-0.3767	-0.2777	-0.0996	-1.0911	0.365	0.4651	0.6617	-0.001	-0.2162	0.6432	0.2389	0.0439	0.1306	0.7106	0.1685	0.0468	-0.3001
106891	0.2856	-0.0105	0.0741	-0.0098	-0.0885	0.3024	0.2248	0.091	-0.4273	-0.1753	0.1086	-0.1689	-0.002	0.1479	0.0538	0.2167	-0.1314	-0.1195	0.1465	0.062	0.05	0.2082	0.5886	0.0352	0.316	0.3893	0.2488	-0.1638	-0.3031	-0.2887	-0.0543	0.2295	-0.136	-0.1215	-0.5237	-0.3427	-0.252	0.4119	-0.2779	0.1349	-0.1221	0.3353	0.1614	0.2164	0.3165	0.6065	0.086	0.1339	-0.1819
106901	-0.599	-0.3197	-0.2867	0.0068	-0.1644	0.4773	-0.1734	-0.1558	-0.1477	-0.0151	0.3548	0.3185	0.0613	-0.1677	-0.3305	-0.3343	-0.1039	-0.1417	0.2052	-0.0448	-0.2065	0.1384	-0.2471	-0.0183	-0.0535	0.2638	0.1858	0.4826	0.5495	-0.0182	-0.0429	0.4517	0.177	0.0879	0.0772	0.1672	-0.0554	0.7326	0.2329	0.0131	-0.4928	0.4906	0.002	0.3366	-0.6827	0.1841	0.1297	0.174	0.3835
106918	-0.34	-0.3622	-0.3582	0.0232	-0.2627	0.3965	0.1946	0.0566	-0.0147	0.2407	0.0947	0.1224	-0.1701	-0.1265	0.3121	-0.1708	-0.0189	-0.0404	0.3545	-0.1228	-0.2906	0.0075	-0.2943	-0.0827	-0.2461	0.1589	0.0262	0.3285	-0.2868	-0.1481	-0.2243	0.0046	-0.0447	-0.2828	0.0701	0.123	0.2669	0.1945	0.1879	-0.1219	-0.4109	0.3492	-0.1413	0.3771	-0.1856	0.1306	0.1453	-0.2479	0.6663
106976	0.1474	0.0562	-0.6537	-0.0085	0.0694	0.6589	0.4293	0.0868	-0.1737	0.611	-0.1045	0.2436	-0.1545	0.1725	0.0533	-0.4618	-0.444	-0.2624	0.3419	0.3465	-0.1689	-0.2149	0.0332	-0.058	0.708	-0.1707	-0.0161	-0.3756	0.4992	-0.1522	0.2034	0.6269	0.4089	-0.6916	-0.0021	-1.1231	0.2464	0.2916	0.4387	-0.0564	0.1262	0.6899	-0.0076	0.3434	-0.0245	0.4081	0.2338	0.1991	0.0697
106979	0.8947	-0.0135	0.1161	-0.2698	0.0018	0.2816	0.4281	0.2078	0.1917	0.2672	-0.7358	-0.0404	0.006	0.1487	0.356	0.2423	0.2759	-0.0148	0.0344	-0.0014	0.3173	0.1235	0.1094	0.1135	0.2302	0.4728	-0.0114	0.1563	0.5119	-0.3096	0.1659	-0.046	0.001	-0.147	-0.3255	-0.1429	0.1095	0.4789	0.2946	0.2188	-0.0688	0.3734	-0.0426	0.1155	0.3139	0.4391	-0.108	-0.0666	0.2017
106981	0.4307	-0.4018	0.1409	-0.2555	0.1519	0.2426	0.2295	-0.2866	0.1243	0.1842	-0.1387	-0.3028	0.0982	0.4296	0.2936	0.3282	0.3473	-0.0214	-0.1551	0.2189	0.3482	0.1319	0.8491	0.4773	0.8579	0.5487	0.2554	0.2318	0.0576	0.3457	0.7034	0.2423	-0.0336	-0.0111	-0.2692	-0.2926	-0.2716	-0.2296	0.0034	-0.0279	-0.039	-0.1072	0.1706	0.1397	0.3862	0.6141	0.3167	0.0746	-0.1551
106983	0.1088	0.1988	-0.3994	0.0854	0.2102	0.2493	0.4313	-0.0418	-0.3747	-0.0094	-0.0983	0.3349	0.0832	0.1927	0.2454	0.5417	-0.1722	0.1255	0.1109	0.0759	-0.2028	0.178	0.3065	0.1189	0.352	0.2578	0.3446	-0.4218	-0.2849	0.0296	-0.2726	0.2922	0.0649	-0.2273	-0.0466	-0.2959	0.0727	0.6951	0.9861	0.5294	-0.1213	0.737	0.0463	-0.1462	-0.2968	0.8031	0.472	0.1266	1.4057
106991	0.3717	-0.4895	0.1216	-0.1611	0.1676	-0.0677	-0.2223	-0.656	-0.411	0.13	0.1396	-0.5965	-0.457	0.3988	0.3509	0.0192	-0.4469	-0.0039	-0.3455	0.084	0.2039	-0.0309	0.1054	-0.1475	0.2465	0.4278	0.0867	-0.1983	-0.8054	-0.1293	0.5118	0.1492	0.092	-0.3776	-0.6014	0.2077	-0.2133	-0.3242	-0.3925	-0.0973	0.047	-0.0574	0.1936	0.0549	0.4903	0.1392	0.342	-0.2185	0.174
107026	-0.1472	-0.3129	-0.7433	0.3291	-0.2805	0.3257	0.2208	0.8413	0.0579	1.022	-0.388	0.3288	-0.2028	-0.2645	0.288	0.2352	0.1827	0.0661	0.9073	0.2375	-0.0739	-0.285	-0.382	-0.4055	-0.447	0.0036	0.0202	0.7613	0.3277	-0.4503	0.4189	-0.0446	-0.1073	-0.4243	-0.3152	-0.4533	0.1873	0.0022	0.437	-0.5755	-0.0895	0.4829	-0.2484	0.3962	-0.0917	0.0935	-0.6013	-0.1619	0.2583
107030	0.0387	-0.1903	-0.4951	0.0923	0.1821	0.4577	0.3802	0.9398	-0.0072	0.6545	-0.0039	-0.065	0.5133	-0.132	0.3817	0.0004	0.1356	0.4068	0.1804	-0.0427	-0.0309	-0.4896	-0.138	-0.6713	-0.113	0.0104	-0.3434	-0.0987	0.8191	-0.2823	-0.0175	-0.067	-0.477	-0.181	0.0054	0.1679	0.0353	0.3056	0.493	-0.0846	-0.5707	0.4693	0.3951	0.1021	-0.5424	0.1536	0.1991	0.1029	0.0917
107034	0.382	-0.3269	-0.3235	-0.3495	0.0733	0.2812	0.1158	0.4697	0.2745	0.5383	-0.3586	-0.2796	-0.2125	0.1571	0.1375	-0.0904	-0.4596	0.0997	-0.2113	0.1355	-0.1309	-0.2983	-0.0802	-0.1789	0.1498	0.2225	-0.2396	0.1322	-0.1761	-0.654	0.1306	-0.3185	-0.3531	-0.2376	-0.257	-0.1636	0.0324	0.0407	0.2037	0.0736	-0.1429	0.1787	0.2474	0.2369	0.298	0.2626	-0.0184	-0.0894	0.0306
107040	0.6492	1.4488	0.3701	-0.4167	-0.0162	0.5154	0.4362	0.088	0.5192	0.4013	-0.8457	0.3867	0.1639	0.1996	-0.2739	-0.2829	-0.056	0.8544	0.0212	0.2992	-0.082	-0.0538	-0.0541	-0.501	0.0583	-0.1048	-0.029	-0.1103	0.3631	-0.321	-0.1741	-0.5802	-0.3159	-0.3557	-0.6665	-0.536	0.5408	-0.1173	0.827	-0.2267	0.2398	-0.1499	-0.3363	-0.1337	0.0907	0.3747	-0.49	0.3978	-0.018
107050	-0.1581	-0.4076	-0.1408	-0.0896	0.0081	-0.1598	0.0589	-0.2103	-0.1195	0.0568	-0.0847	-0.1365	-0.1695	0.2607	0.2327	0.1828	0.0657	-0.3939	-0.0181	0.4374	-0.4545	-0.0672	0.0043	0.0797	0.1404	0.0692	-0.0519	-0.7106	-0.5985	-0.0633	0.0994	0.2149	-0.3626	-0.0054	0.0759	0.0817	-0.0561	0.1843	0.3805	0.0749	-0.1884	0.2535	0.275	-0.4809	-0.1553	0.2216	0.345	-0.0758	-0.4288
107051	0.1701	0.3825	0.5464	0.1886	0.2996	-1.0194	-0.2459	-0.6203	-0.4309	-0.6904	0.0344	-0.3615	0.3145	0.1399	0.1497	0.1674	-0.4572	-0.0358	-0.2913	-0.4057	0.2075	-0.0192	-0.0235	0.2319	0.1848	-0.1442	0.0437	-0.6586	-0.8363	0.5723	0.4589	0.2438	-0.0134	0.1461	0.3615	0.0257	-0.3793	-0.9695	-0.4651	0.3943	0.4914	-0.8723	0.1013	-0.4688	-0.0441	-0.7234	0.3195	0.2729	-0.9157
107053	0.7026	0.4245	-0.7756	-0.3699	0.2613	0.6081	-0.0783	1.2191	0.8957	1.2054	-0.4998	-0.1641	-0.0728	-0.1846	0.2196	0.1954	-0.0641	0.8245	-0.0405	0.6095	0.3369	-0.8439	0.2226	-0.065	0.4416	-0.0221	-0.6545	0.4355	-0.48	-0.5716	0.6613	-0.5017	-0.0199	-0.6395	-0.2516	-0.5848	0.2448	-0.306	-0.0292	-0.088	0.0184	0.0109	0.5313	0.3008	0.0465	0.1678	-0.3546	0.0334	-0.5783
107061	-0.1007	0.4494	0.4133	0.5517	-0.0662	-1.1229	-0.1958	-0.3118	0.0258	-0.5887	0.2098	0.4641	0.1267	0.1582	-0.5186	0.2745	0.0683	0.647	-0.4639	-0.1124	0.197	-0.1821	-0.333	0.6335	-0.5778	-0.4929	-0.0196	0.1322	0.0932	0.1701	-0.5497	0.0996	-0.4847	0.1824	0.1948	0.0661	-0.2779	-0.7717	-0.2609	0.0442	0.3733	-0.6328	-0.0437	-0.7608	-0.0411	-0.1505	-0.0518	0.1068	-1.0978
107073	-0.6374	-0.0348	0.2252	0.1022	-0.3943	-0.0373	0.1378	-0.1296	0.0998	-0.5407	0.1591	0.0436	-0.183	-0.3855	-0.3197	0.1055	0.4854	-0.2649	-0.1995	0.4576	0.0797	0.1381	-0.2975	-0.0651	0.3	-0.0465	-0.1044	0.013	0.0473	-0.1121	-0.1648	-0.124	-0.0763	0.3851	-0.211	0.1801	-0.2516	-0.3081	-0.2632	-0.2551	0.5614	-0.3992	0.1109	-0.0049	-0.0339	-0.6928	-0.34	-0.2862	-0.1461
107085	0.2161	-0.228	-0.2599	0.2726	0.3209	0.1447	0.67	0.6356	-0.1897	0.2849	-0.0293	-0.9063	0.1294	0.4477	0.0426	-0.3242	-0.2476	0.7946	0.2738	-0.7807	-0.0539	-0.2126	-0.0282	0.0213	0.3606	0.3982	0.0147	-0.83	-0.7443	-0.2	0.3342	0.0786	-0.3257	-0.416	-0.1467	-0.5107	-0.181	-0.9844	-0.42	0.788	-0.1734	0.0684	0.304	0.3098	0.0021	0.1619	0.4674	-0.0179	0.0119
107094	0.862	-0.0101	0.3703	-0.7018	0.0321	-0.2608	0.0462	-0.3697	-0.0668	0.6349	-0.744	-0.5174	-0.4804	0.5356	0.0915	0.3504	-0.247	-0.1461	-1.1672	-0.1076	-0.0064	-0.0181	-0.4692	0.2584	0.6477	0.5329	-0.3548	-0.2281	0.2207	-0.6529	-0.2515	-0.2723	-0.1476	-0.803	-0.7051	-0.7801	-0.1997	-0.4592	-0.408	0.2869	-0.1292	-0.0706	0.2572	0.0198	0.1042	0.2595	-0.3539	-0.4993	-0.2475
107104	0.1384	0.3269	-0.3947	-0.2586	0.3048	0.345	0.0657	0.835	0.7515	0.7824	0.165	0.0732	0.6013	-0.035	-0.1853	-0.104	-0.2592	0.419	0.3731	0.0931	-0.2202	-0.1102	0.1934	-0.1997	-0.0779	0.0329	-0.1745	0.0788	-0.4493	-0.7287	0.2531	-0.4912	-0.2357	-0.1266	0.0514	-0.2974	0.3381	0.015	0.7049	-0.0845	-0.3746	0.0552	0.3146	0.3035	-0.198	-0.0369	0.0074	0.0933	-0.1006
107117	0.2315	-0.3192	0.1361	-0.5522	-0.0159	0.5817	-0.2364	0.072	-0.1099	0.0699	0.1278	0.193	-0.1981	0.0826	-0.3679	0.2699	-0.3285	0.0068	-0.1088	-0.1511	-0.0405	0.3059	0.206	0.2044	0.1268	0.3986	0.0802	0.3889	0.3268	-0.1637	0.4004	0.114	0.0565	0.0912	-0.5051	0.3659	-0.1827	0.3172	0.0821	0.21	-0.0746	-0.1554	0.0563	0.2875	0.5075	0.2373	-0.1326	-0.1092	0.5049
107121	-0.2501	0.0898	0.1558	0.0429	-0.1969	-0.225	-0.184	-0.6018	0.2229	-0.2841	-0.1213	0.0786	-0.2518	0.1308	0.1512	-0.0422	0.5618	-0.2877	-0.1898	-0.0219	-0.3664	0.0245	-0.0913	0.1461	-0.0051	-0.3352	0.2977	0.107	0.2945	0.3571	-0.4054	0.0466	0.2062	0.1918	0.1395	-0.0002	-0.0251	0.5382	-0.3093	-0.4689	-0.1784	-0.4582	-0.0653	-0.0978	-0.9326	0.2456	-0.0258	0.0986	-0.0472
107132	-0.0975	-0.1289	0.1238	-0.3803	-0.3295	0.5929	-0.0462	0.1262	-0.0099	0.0177	0.3317	0.096	0.34	0.0459	-0.242	-0.2073	-0.0298	-0.0807	-0.2723	-0.1443	-0.2471	0.1243	0.1727	0.2464	-0.3379	0.0865	0.2389	0.9724	-0.6779	-0.0253	0.3067	0.2905	0.0358	0.163	-0.12	-0.0538	-0.1041	-0.0131	-0.2201	0.0749	-0.3459	-0.0346	-0.0704	0.396	-0.0615	0.1746	-0.0693	-0.0816	0.3035
107158	0.357	-0.227	0.4742	-0.2794	-0.2134	0.2196	0.0608	-0.2404	0.0356	-0.0818	-0.0434	0.0677	-0.0912	0.0986	-0.007	-0.2369	-0.0793	-0.3402	-0.2957	-0.0241	0.0695	0.2121	0.1006	0.3264	0.1173	0.2206	-0.1561	-0.0974	0.6844	0.1174	0.4714	0.0799	-0.0456	0.1987	-0.3174	0.6505	-0.3916	0.3597	-0.2933	-0.0958	-0.0193	0.3486	-0.2817	0.1509	0.2926	0.0195	-0.1061	-0.1671	0.6186
107176	0.2536	-0.007	-0.3822	-0.0423	0.0275	0.5902	0.2006	0.3336	-0.3503	0.1876	0.3647	0.1484	-0.0325	-0.0188	-0.2316	-0.0256	-0.621	0.3041	-0.0676	1.0078	0.1575	0.0543	-0.1598	0.171	0.1548	0.2895	-0.1585	0.0843	0.6639	-0.5219	0.2319	0.0824	-0.0978	-0.4474	-0.5406	-0.1518	0.0328	0.4123	-0.0905	0.1183	-0.2212	0.0639	0.2717	-0.0404	0.1727	0.0794	-0.2054	-0.1395	0.0045
107178	-0.197	0.9472	0.647	0.0696	-0.1795	-0.4899	-0.1072	0.4578	0.4914	-0.4769	0.3224	0.8912	0.3873	-0.3006	-0.178	0.7175	-0.4278	0.7479	-0.0565	2.77	0.2885	-0.3332	-0.1208	-0.8524	-0.6405	-1.0028	-0.122	0.0463	-0.243	0.2516	-0.9624	-0.6846	-0.3471	-0.2946	0.2714	-0.2381	0.5747	-1.6386	-0.5051	-0.3454	0.4617	-1.0627	-0.1508	-0.608	0.0493	-0.6174	-0.3914	0.0155	-1.117
107201	1.0005	-0.2309	0.2023	-0.5408	0.3871	0.3133	0.259	0.2561	0.286	-0.078	-0.2298	-0.4308	-0.0654	0.2739	0.2562	0.0961	0.5578	-0.1112	-0.1431	0.0364	0.087	0.3555	0.348	0.1399	0.8712	0.637	0.4618	0.1814	-0.0041	-0.0249	0.5289	-0.116	-0.2294	-0.0359	-0.56	-0.2254	-0.2203	0.4453	-0.0624	0.3923	-0.2454	0.1393	0.3344	0.7529	0.76	0.862	-0.1768	-0.4168	0.0047
107220	-0.2449	0.6159	0.5529	0.5246	-0.1591	-0.2828	-0.4841	-0.5857	0.4746	-0.5453	0.1083	0.049	-0.2834	-0.6203	-0.3025	0.0723	0.3185	-0.377	-0.109	0.0103	0.1687	-0.0308	-0.3881	-0.3441	-0.3207	-0.9387	0.3157	0.3257	0.5745	-0.1332	-0.4931	-0.4677	0.1707	0.8126	0.1609	0.1521	0.0951	-1.2425	-0.075	-0.3947	0.5833	-0.7156	-0.4938	0.1574	0.1245	-1.7576	-0.6952	0.6707	0.0249
107237	0.5692	-0.2105	0.2199	-0.9619	0.2602	0.6919	-0.0914	0.2521	0.6908	0.8688	-0.6041	-0.5949	-0.1086	0.475	-0.32	0.3637	0.3439	-0.1247	-0.6132	-0.0213	0.1304	-0.0284	0.4824	0.0447	0.308	0.0932	0.3616	-0.2391	0.3726	0.2464	0.7754	0.0701	-0.0218	0.3921	-0.2069	-0.2549	-0.7878	0.161	0.0195	-0.156	-0.4119	-0.0894	-0.028	0.0011	0.5734	-0.2163	0.2012	-0.6677	0.1018
107266	0.7727	-0.3407	0.1933	-0.4728	-0.1507	0.3779	-0.1176	-0.2712	0.1101	0.4435	-0.8067	-0.1312	-0.4787	0.3585	-0.4097	-0.0252	0.2999	0.1243	-0.5659	-0.2599	-0.0293	-0.2409	-0.3849	-0.1685	0.0852	0.4879	-0.4664	0.3773	0.3941	-0.5821	0.4078	-0.5647	-0.2835	-0.5671	-0.5213	-0.2534	-0.1462	-0.2044	-0.124	-0.3967	-0.2736	0.0875	-0.1054	0.0654	0.161	-0.0646	-0.1839	-0.6224	0.1902
107290	0.3304	-0.0073	-0.3059	0.2137	0.276	0.7288	0.2774	0.6668	0.0857	0.2876	0.2385	-0.0534	0.065	-0.0996	0.4045	0.2114	0.4457	0.2752	0.551	0.1652	0.1588	0.0302	0.1158	-0.0704	0.2769	0.4743	0.3344	0.6457	0.4138	-0.1526	0.0414	0.2729	-0.14	-0.2448	0.0633	-0.436	0.318	0.605	0.3177	0.3777	-0.0953	0.6556	0.2504	0.3262	-0.028	0.6654	0.2381	-0.022	-0.2671
107292	-0.1201	-0.1686	0.1827	-0.1757	-0.1541	-0.1008	0.2159	-0.3528	-0.3346	-0.1237	0.299	0.3166	-0.0567	-0.0025	-0.1875	-0.0618	-0.3668	-0.279	-0.4562	0.2369	0.1454	0.2977	0.1147	0.176	0.315	0.3384	-0.0286	0.438	0.4368	-0.0428	-0.0445	0.198	-0.0345	0.2448	-0.2772	0.0216	-0.5152	0.221	-0.2709	0.2562	0.3674	0.288	0.2056	0.1901	0.1965	0.6944	0.0202	0.2813	0.0441
107302	0.3703	-0.0834	-0.7233	0.0317	0.3015	0.5161	0.3756	0.2103	0.2857	0.5843	-0.2273	-0.1468	0.1363	0.1281	0.1731	-0.1364	0.1043	0.1385	0.4607	0.0076	-0.4856	-0.1961	0.2841	0.1837	0.1765	0.5854	0.1833	0.3324	-0.0742	-0.5537	0.0274	-0.1668	-0.2463	-0.3944	-0.221	-0.5537	0.4779	0.1993	0.0425	-0.4338	-0.2072	0.586	-0.1321	0.3513	0.3725	0.4701	0.2256	0.0152	-0.139
107316	0.9	-0.2066	-0.1	-0.1768	0.3164	0.3613	0.0633	0.3448	0.2284	0.7419	-0.5248	-0.4744	-0.2174	0.3622	0.1169	0.0301	0.0649	0.0204	-0.1966	0.0726	0.2003	0.0056	0.0807	0.0922	0.5696	0.5834	-0.4238	-0.2672	0.1252	-0.5069	0.1139	-0.3015	-0.3679	-0.2117	-0.5462	-0.5119	-0.0721	0.2416	-0.0566	-0.1358	0.008	0.1737	0.2418	0.3454	0.4159	-0.2635	-0.1657	-0.1861	-0.0572
107338	-0.0137	0.1466	-0.547	-0.0254	-0.0272	0.077	0.2239	0.6743	0.2503	0.7922	0.4354	-0.4657	0.614	0.0043	0.353	-0.3592	-0.0936	0.6682	0.6983	0.0134	-0.2336	-0.1428	0.3553	-0.0266	0.0045	0.2623	-0.1635	-0.0102	-0.2311	-0.4939	0.1024	-0.2698	-0.13	-0.0875	0.4394	-0.4951	0.327	0.0625	0.2551	-0.1284	-0.294	0.1022	0.4904	0.4841	-0.7657	-0.0599	0.3239	-0.0026	-0.1813
107339	-0.4911	-0.0498	-0.3362	0.1813	-0.254	0.5314	0.0172	-0.4783	0.0838	0.318	-0.1223	0.3111	0.2933	-0.3639	-0.4587	-0.3255	-0.2059	-0.1498	0.189	0.0953	-0.2448	-0.1232	-0.225	-0.277	-0.0137	0.1966	0.1407	0.3118	0.0497	-0.3705	0.2795	0.239	0.3036	-0.3518	0.0582	-0.123	0.3703	0.3427	0.5552	0.0989	-0.427	0.1302	0.3027	-0.0216	-0.1163	0.1665	0.0425	-0.4468	0.1016
107344	0.318	0.415	-0.22	-0.1696	-0.1524	0.3446	0.0271	0.4804	0.1974	0.2545	-0.1307	0.1072	-0.1941	-0.0506	0.5447	-0.2008	-0.0378	0.2526	0.1804	0.0161	-0.1085	-0.1722	-0.2758	0.0104	-0.1621	0.1659	-0.1104	0.3559	-0.0549	-0.406	-0.2566	-0.3522	-0.135	-0.2059	-0.019	0.0409	0.34	0.1984	0.276	-0.209	-0.2634	0.1607	-0.004	0.1211	0.098	0.1191	0.0429	-0.1091	0.4993
107362	0.3076	-0.1446	0.1215	-0.372	-0.2737	0.4261	0.2055	-0.0116	-0.0417	-0.3322	-0.4333	-0.0748	-0.1999	0.2421	0.0394	0.0428	0.3083	0.0539	-0.2296	0.14	0.0741	0.1204	0.1594	0.1628	0.2855	0.293	0.0314	-0.0461	0.4013	-0.0132	0.287	0.1115	-0.1789	-0.1101	-0.6045	0.0661	-0.1821	0.3866	-0.5437	0.0229	0.0352	0.181	0.1417	0.1967	0.4788	0.4698	-0.2945	0.0442	0.1773
107385	0.4348	-0.0931	0.2778	-0.244	0.2904	-0.3401	0.3814	-0.2117	0.3955	0.1613	-0.4953	-0.001	-0.269	0.1404	0.0866	-0.0586	0.0525	-0.9005	-0.2629	0.5667	-0.1717	0.1307	0.2727	-0.1805	0.503	0.1387	0.2229	-0.0522	0.1431	-0.376	0.1198	0.0758	0.2738	0.1186	-0.3733	0.2466	0.1048	0.5883	0.0001	0.3311	-0.083	0.2023	-0.1599	0.2183	0.6091	-0.1031	3.5563	-0.5539	0.6678
107398	0.068	0.0606	-0.1588	0.185	-0.3821	0.6218	0.5965	0.4644	-0.1464	0.3016	0.2188	0.613	-0.1169	0.2023	0.6985	0.1801	0.9344	-0.016	0.7722	0.1803	0.454	0.2182	0.3043	0.0035	0.2941	0.0233	0.1648	0.7125	1.0362	-0.0693	-0.1947	0.2023	0.3101	-0.287	-0.0848	-0.0602	0.1329	1.2101	0.7631	0.1303	-0.4033	1.015	0.0992	0.2357	0.2302	0.8415	0.2656	0.3131	0.2916
107402	-0.1211	-0.3714	-0.3403	0.083	0.0247	0.3223	0.2593	0.3291	0.2337	0.2465	-0.0349	0.0696	-0.0797	0.1541	0.361	-0.2347	0.015	0.0465	0.3081	-0.4581	-0.1309	0.1869	0.0676	-0.038	-0.2077	0.169	0.2454	-0.0018	0.1356	0.0503	-0.1576	0.1403	0.0694	0.0049	-0.2045	-0.1266	0.1731	0.4606	0.4284	0.0306	-0.5985	0.0197	0.1092	0.2352	-0.0787	0.594	0.0569	-0.3866	0.2722
107414	-0.5819	-0.183	-0.5049	0.178	-0.0087	0.251	0.0824	-0.3467	-0.1821	-0.4837	0.3621	0.4315	-0.3143	-0.0703	-0.0152	0.1106	-0.186	-0.2568	-0.1408	0.1302	-0.0816	0.1734	0.0685	0.0504	-0.0949	0.3676	0.3143	0.2944	0.4307	0.2344	-0.5316	0.4073	0.2691	0.3296	0.072	0.4665	-0.3155	0.6289	0.2991	0.032	-0.0438	0.4396	-0.0823	0.0736	0.0427	0.5045	0.3344	0.0128	0.5753
107417	0.055	-0.1565	0.0479	-0.1682	-0.4997	0.3484	-0.0654	0.1969	-0.0408	0.0136	0.5923	0.2694	0.4235	0.0821	0.1635	-0.346	0.3214	-0.1483	0.3588	-0.2961	-0.2444	0.4412	0.0411	0.1029	-0.1381	0.4271	0.3654	0.4027	0.8296	-0.0626	0.4644	-0.0018	0.3672	-0.0233	-0.0885	0.501	0.1546	0.4103	0.0701	0.2477	-0.5025	0.2082	-0.0035	0.5154	0.3573	0.31	0.1709	0.0136	1.0046
107428	-0.2365	0.1441	-0.2396	-0.0342	0.1596	0.3649	-0.1652	-0.0255	-0.0338	0.0129	0.1462	0.3106	0.0328	-0.0033	0.1574	0.0783	-0.2189	-0.0937	0.2942	0.0067	-0.1519	0.2917	-0.0386	0.0244	0.0511	0.0055	0.2381	0.6079	0.7803	0.0958	0	0.0718	0.5531	0.1302	-0.1882	0.3883	0.0153	0.5958	0.774	0.0439	-0.2247	0.1454	-0.1401	0.2492	0.3089	0.107	0.2409	0.2049	0.3207
107437	-0.0133	0.1685	-0.2569	-0.0772	-0.1404	0.4754	0.0777	-0.0268	0.126	-0.0116	0.1303	0.3313	-0.1513	-0.0725	-0.2294	-0.1011	0.0359	0.0292	0.4059	0.1117	-0.2401	0.168	-0.1393	0.1291	0.0004	0.1166	0.3412	0.2487	0.4966	-0.0735	0.1136	0.2413	0.08	0.041	0.045	0.0064	-0.006	0.6463	0.3175	-0.0208	-0.2491	0.4452	0.037	0.4217	-0.2575	0.2835	0.0605	-0.0809	0.2618
107444	-0.0013	-0.3839	-0.6447	0.1176	0.3918	0.2271	0.3267	0.4578	-0.2355	0.4168	0.2818	-0.2679	-0.0158	0.0999	0.1561	-0.2206	-0.2435	0.4926	0.5935	-0.0291	0.0138	-0.2343	0.1537	-0.1699	0.1481	0.1525	0.1131	-0.3253	-0.7804	-0.4083	0.005	0.0252	-0.1909	-0.7295	0.1338	-0.6597	0.4916	0.0121	0.2445	0.0053	-0.3687	0.1567	0.1187	0.2972	0.1381	0.1375	0.2794	-0.0924	-0.2718
107450	-0.0647	-0.2146	-0.4687	0.3024	-0.4871	0.2098	-0.1072	-0.1214	0.2894	-0.0922	-0.0421	0.0732	0.2257	-0.0908	-0.1365	0.1319	0.1487	-0.3606	-0.296	0.1458	-0.4446	-0.0629	0.0069	0.0907	-0.4183	-0.016	-0.1918	0.4696	0.6169	-0.2097	-0.0118	-0.0815	-0.0577	0.154	0.0571	-0.0047	-0.2068	0.1187	0.1895	-0.1638	-0.0753	-0.1204	-0.5221	0.0173	-0.012	-0.3778	-0.2809	0.222	0.1791
107457	0.475	1.025	1.174	-1.2426	1.264	-0.437	-1.2897	-0.0818	0.1336	-1.2932	-1.2201	-1.2448	-0.4449	-0.4477	0.2191	0.0677	1.1002	0.3674	-0.2604	-0.0227	-1.7221	-1.5125	-0.5534	0.7548	-0.0038	-0.6746	-0.7939	0.501	-1.0654	-0.6221	-0.8675	-0.8874	-0.2151	-0.245	-2.0731	0.0057	0.269	-0.7892	0.2722	-1.3978	0.905	0.9361	-0.653	-1.3855	0.3852	-0.8798	0.4685	-0.4638	-0.537
107464	0.441	-0.1666	0.0249	-0.198	-0.0477	0.285	0.6091	0.1963	0.05	0.2143	-0.3585	-0.2054	-0.0985	0.1907	0.1812	0.2891	0.1769	0.0252	0.4887	-0.0514	0.38	0.0954	0.3063	-0.1638	0.4306	0.5064	0.104	0.0269	0.7705	-0.3287	-0.0531	0.0595	-0.4789	-0.1503	-0.415	-0.4074	0.2169	0.7244	0.0272	0.0823	-0.0596	0.3667	0.4617	0.1699	0.3479	0.9642	0.0935	-0.0239	0.0525
107487	0.1366	-0.0823	-0.3263	0.0771	0.1691	0.363	0.2127	0.3932	-0.0464	0.5498	0.2625	0.3422	-0.0325	0.2058	0.6625	-0.0645	0.0837	-0.1526	0.2093	0.0434	-0.061	0.2371	0.0385	-0.0898	0.4496	0.0937	0.1746	0.2341	-0.1264	0.1714	0.2415	-0.0988	0.0541	-0.3344	-0.2501	-0.0149	0.1338	0.3115	0.2534	0.1629	-0.6237	0.2146	0.1547	0.5353	-0.0189	0.5355	0.1305	0.0802	0.1593
107499	0.4861	-0.5273	-0.1616	-0.4664	0.1596	0.2155	-0.1009	-0.3446	0.1235	0.4825	-0.0599	-0.378	-0.2689	0.3996	-0.1792	0.0759	-0.2975	0.0104	-0.6256	-0.0942	0.1286	-0.0812	0.3784	0.4017	0.3065	0.3753	0.0031	-0.2913	0.4186	0.0003	0.4327	-0.0549	-0.2708	0.3588	-0.5439	-0.0896	-0.5598	0.2838	-0.4699	-0.2786	0.1795	0.1764	0.2049	0.0532	0.323	0.3901	-0.1599	-0.3521	0.0349
107511	0.6316	-0.4689	0.0076	-0.1251	0.2093	0.1284	0.5364	-0.1464	-0.1425	0.1064	-0.2293	-0.3087	0.0202	0.0933	0.3383	0.3313	-0.117	-0.1448	0.0316	0.0064	0.4175	0.2462	1.8179	0.4368	0.5493	0.586	0.1886	-0.2963	-0.7316	-0.0173	0.5312	0.0215	-0.0878	-0.1614	-0.4019	-0.4686	-0.0444	-0.1178	-0.3741	0.1832	-0.1003	-0.0454	0.328	0.1813	0.4402	0.4929	0.1578	-0.1179	-0.1906
107517	0.1041	-0.2559	-0.0307	-0.0058	-0.0421	0.234	0.1351	-0.1801	0.4249	0.0952	-0.1006	-0.2138	0.0899	-0.0425	-0.0594	-0.2561	0.2303	-0.1453	0.2307	-0.0738	-0.3441	0.0675	0.0343	0.0619	-0.3086	0.2243	-0.0517	0.3407	0.5768	-0.2447	0.4687	0.1017	0.1771	0.1745	-0.0967	0.3004	0.1136	0.4437	0.2739	0.0844	-0.316	0.228	-0.1895	0.1638	0.0742	0.0278	0.1771	-0.0079	0.3424
107518	0.1562	-0.9073	0.4097	0.0143	0.2311	0.3339	0.2248	-0.1002	0.0322	-0.1597	0.1251	0.4521	-0.0237	0.2693	0.2027	-0.0302	-0.3265	0.0519	0.3473	-0.2124	0.2541	0.4808	0.2633	0.1341	0.0369	0.3868	0.3495	0.7987	0.762	0.3354	-0.3626	0.4854	-0.1213	0.1004	-0.0435	-0.2668	-0.1745	0.9778	0.262	0.2904	-0.0493	-0.1237	0.3463	0.5396	-0.3154	0.652	0.4758	0.2822	-0.0649
107614	-0.6424	-0.3893	-0.2613	0.2297	0.2779	0.1666	0.3062	-0.2307	-0.0162	-0.0346	0.1347	0.4221	-0.0791	-0.1324	0.0347	-0.0897	0.1461	-0.2422	0.3191	-0.02	-0.0502	0.413	-0.0903	0.1446	-0.0657	0.1343	0.2116	0.6276	0.649	0.2265	-0.2891	0.1224	0.3277	-0.0609	0.1533	0.3338	0.1774	0.7053	0.3239	-0.1264	-0.3987	0.6022	0.0123	0.4018	-0.1181	0.2603	0.3176	0.2332	0.8497
107627	-0.0977	0.05	-0.6632	0.164	0.1594	0.4539	0.1488	0.5046	0.2871	0.5173	0.3164	0.0978	0.1586	-0.1062	-0.287	-0.3418	-0.2799	0.1824	0.3392	0.3552	-0.3464	-0.2577	-0.3173	-0.2393	-0.2342	0.3022	-0.3566	0.3204	0.0614	-0.5879	-0.0742	-0.1409	-0.2947	-0.1769	0.1003	-0.1445	0.3463	0.5167	0.5235	-0.0134	-0.4669	0.4335	0.2208	0.0655	-0.372	-0.0089	0.1965	0.1725	-0.1387
107640	-0.4064	-0.3499	-0.4526	0.0842	-0.1684	0.2471	0.1535	0.1766	-0.1728	0.2202	0.132	-0.0612	-0.1116	-0.1398	0.071	-0.3421	-0.0199	0.0093	0.2986	-0.4117	-0.3007	-0.1194	-0.2	-0.1871	-0.1453	0.1584	0.0884	0.4942	-0.5509	0.0449	-0.279	0.2276	0.0494	-0.3286	0.1456	-0.3932	0.3762	0.1411	0.2323	-0.1619	-0.4217	0.1946	-0.0971	0.318	-0.5254	0.0926	0.1534	-0.3161	0.0445
107645	-0.1465	-0.3147	-1.1128	-0.0507	0.3303	-0.0601	-0.2546	1.8334	0.6908	1.8074	-0.1627	-0.0754	0.0461	-0.2792	0.5927	-0.3809	-0.0832	0.7058	1.0065	0.6847	-0.0058	-0.9096	0.1879	-0.4043	-0.3845	0.1805	-1.0401	0.2364	-1.7914	-1.1941	-0.2214	-1.1567	-0.8082	-0.461	0.2167	-0.4666	0.9261	-0.2831	0.485	-0.5502	-0.1953	0.4947	0.5392	0.5224	-0.7406	-0.3098	0.1111	-0.2421	0.0331
107655	0.1516	-0.4952	-0.3404	0.0504	-0.2555	0.3788	0.3185	0.3214	0.1376	0.0602	0.3741	0.3983	0.1458	0.2917	-0.0599	-0.0867	-0.3732	0.0597	0.3883	0.0629	0.2129	0.848	0.04	-0.2088	-0.1393	0.2113	0.4589	0.5418	0.1014	0.0917	0.6688	-0.0206	0.1835	0.0529	0.468	0.1573	0.1297	0.8952	0.3235	0.2007	-0.6577	0.3393	0.1893	0.857	0.9889	0.3929	-0.0332	0.2419	0.2658
107690	-1.0577	-0.3912	-0.547	-0.354	-0.4825	-0.1612	0.0574	-0.2444	-0.2481	-0.7688	-0.3831	0.026	-0.4186	0.4123	-0.4917	-0.4029	-0.2413	-0.5969	-0.6333	0.2063	-0.8617	-0.6465	0.0067	0.4157	-0.5572	0.2286	-0.3571	-0.3077	0.0367	-0.018	0.1984	0.3016	-0.083	0.4391	0.378	0.9883	-0.1146	-0.2543	0.3573	0.2065	0.3395	-0.1778	-0.2739	-0.3438	-0.1995	-0.6357	0.6558	0.0375	0.5542
107691	0.9037	-0.1987	-0.1961	-0.1561	-0.0053	0.1147	0.345	0.0472	0.0786	0.2952	-0.9657	-0.7045	-0.7013	0.0708	-0.2841	0.39	-0.2193	-0.4277	-0.1519	0.2246	-0.0365	-0.4518	0.1617	0.0993	0.3498	0.2113	-0.2384	-0.6572	0.0663	-1.1287	0.4599	-0.2127	-0.2535	-0.219	-0.5073	-0.0795	-0.2073	-0.1802	0.2759	0.2147	0.083	0.2085	0.2129	-0.4599	0.3072	0.2068	0.0343	-0.8578	0.0839
107703	0.6861	-0.2226	-0.7153	0.5025	0.2374	0.7449	0.6018	0.3179	-0.1316	0.8742	-0.4662	0.0068	-0.442	0.1518	0.3431	-0.107	0.9734	0.5236	0.8774	-0.216	-0.3002	-0.5568	-0.7143	-0.1526	-0.0241	0.4873	0.168	0.1972	-0.7283	-0.2107	-0.8952	-0.5912	-0.3785	-0.8859	0.0269	-1.094	0.7956	0.6104	0.629	-0.2373	-0.2966	1.1293	0.0811	0.2506	-1.4045	0.6386	0.2394	-0.2483	0.1647
107710	0.3478	-0.3508	-0.5666	-0.052	0.0504	0.0588	0.1359	0.1457	0.1017	0.5371	-0.1201	0.0066	-0.0225	-0.0579	0.1682	-0.0681	-0.3741	-0.1203	-0.0763	0.1328	0.1276	-0.1867	0.0043	0.1864	0.2523	0.5225	-0.2019	0.0777	0.2672	-0.5785	-0.0048	-0.2447	0.039	-0.2218	-0.275	-0.3172	0.4078	-0.3612	0.124	-0.2308	-0.2395	0.2847	0.1704	0.2191	0.1702	0.2579	-0.033	-0.0909	0.0101
107725	-0.0957	0.1613	-0.1921	-0.2919	-0.5698	0.9727	-0.2158	-0.1414	0.7087	0.0849	-0.4988	-0.0687	-0.7433	-0.0996	-0.3641	-0.2628	0.0927	0.0269	-0.5698	0.2485	-0.5493	0.0725	-0.4912	0.4673	0.0126	0.1842	0.1531	0.3875	0.6939	0.0837	0.4652	-0.111	1.2717	-0.0928	-0.147	0.0917	0.1509	-0.0144	-0.2297	-0.521	-0.164	0.3659	0.1671	0.0211	0.2713	0.3366	-0.0862	-0.5917	0.1269
107730	-0.2689	0.6073	0.3581	0.7058	-0.2248	-0.7094	-0.0256	-0.2771	-0.0565	-0.1122	0.2253	0.5649	0.0629	-0.4488	-0.0722	0.1302	-0.358	0.3089	-0.2954	0.2993	0.097	-0.2304	0.0376	-0.3464	-0.6333	-0.6445	-0.2078	-0.1097	-0.2311	0.265	-0.7021	-0.3681	0.2478	0.4099	0.0981	0.0061	0.29	-0.9961	0.1687	-0.2313	0.5011	-0.6993	-0.1095	-0.3692	-0.0579	-0.6923	-0.4747	0.7819	-1.0187
107745	-0.2046	-0.0435	-0.9147	0.2329	0.3522	-0.0692	0.0328	1.2823	0.5136	0.9225	-0.1272	-0.1186	0.1757	-0.3875	0.2012	-0.2265	-0.2394	0.7684	0.7107	0.7552	-0.4235	-0.6111	-0.4018	-0.4875	-0.3989	-0.2154	-1.1057	0.0185	-0.3966	-0.682	-0.358	-0.8338	-0.517	-0.727	0.1173	-0.1818	0.751	0.1482	0.258	-0.5475	0.0021	0.5935	0.0535	-0.1336	-0.5668	-0.4442	-0.1146	-0.2353	-0.2834
107747	-0.0065	-0.1155	-0.5315	-0.031	-0.0119	0.2488	0.176	0.1946	0.1045	0.495	0.0564	0.3545	0.0673	-0.0477	0.1456	-0.0239	0.3125	-0.1881	0.5018	0.1806	-0.0781	0.0324	-0.0384	-0.0987	0.1808	0.2656	0.1106	-0.0445	0.3676	-0.3897	-0.1055	-0.0913	0.187	-0.1754	0.0386	-0.3193	0.5391	0.5466	0.7319	-0.1114	-0.4117	0.3505	-0.265	0.1854	-0.1696	0.2237	0.2294	0.0741	0.2268
107788	0.227	-0.2964	0.1441	0.6068	0.4283	-0.7836	0.6462	0.0709	-0.9359	-0.1071	0.293	-0.7827	0.752	0.7795	0.4076	0.3337	-0.7368	0.4807	0.4168	0.1478	-0.1895	-0.0985	0.4715	-0.0374	0.2692	0.3354	0.8061	-1.2682	-1.1909	-0.0754	0.7303	0.8036	-0.3257	-0.5398	0.1393	-0.0888	-0.3832	-0.5245	-0.7269	0.3135	0.0935	-0.416	0.3676	0.3501	-0.3657	-0.2485	0.4298	-0.0841	-1.2894
107810	0.1732	-0.0865	-0.4952	0.3453	0.1695	0.3491	0.4433	0.8273	-0.4242	0.6291	0.0651	-0.0999	0.2051	-0.0937	0.3549	-0.0629	-0.0993	0.1974	0.5687	0.1258	0.1445	-0.04	0.4173	-0.0369	0.2084	0.5012	0.127	0.5256	0.0127	-0.4379	0.2242	-0.1223	-0.1242	-0.2639	-0.0941	-0.5905	0.4378	-0.1719	0.412	0.0247	-0.2218	0.342	-0.0144	0.3902	0.0017	0.2038	0.4205	0.3405	-0.1623
107823	0.7259	-0.1589	-0.6053	0.1665	0.4555	0.1336	0.3154	0.8866	0.2581	0.9585	-0.2425	-0.7151	0.1276	-0.0681	-0.1229	-0.1174	0.1154	0.7611	0.672	0.4206	0.4422	-0.113	-0.0184	-0.236	0.5134	0.3748	-0.0517	0.3127	-0.7413	-0.8501	0.2839	-0.4489	-0.4571	-0.2131	-0.0558	-1.0127	0.4136	0.4048	0.4498	-0.2501	-0.0452	0.6634	0.0794	0.3844	0.0342	0.7044	-0.0387	-0.1107	-0.6014
107835	-0.0386	-0.0719	0.6484	-0.4651	-0.317	0.3357	0.9504	0.5285	-0.2329	0.1535	0.2574	0.3711	1.0209	0.1879	0.041	-0.0432	0.4245	-0.0015	0.3426	-0.0465	0.2102	0.1761	0.4665	1.0419	-0.1212	0.9825	0.296	-0.2544	0.692	0.2706	0.1408	0.3137	0.001	0.3588	-0.4418	-0.2394	-0.0362	0.8749	0.0651	0.3846	-0.6194	0.0068	0.1452	0.7212	0.1988	0.3587	0.3469	-0.1873	1.401
107842	-0.0509	-0.1815	-0.2213	-0.0677	0.3227	0.477	0.2365	0.6599	0.7082	0.4762	0.2642	0.222	0.213	-0.2357	0.3736	0.0016	0.062	0.439	0.4702	0.441	0.0838	-0.2618	-0.0627	-0.0542	0.491	0.508	0.1447	0.2812	-0.0086	-0.0222	-0.4402	-0.0265	-0.3299	-0.327	-0.1139	-0.4355	0.2055	0.5481	0.237	-0.0772	-0.4324	0.4204	0.1822	0.0526	-0.6365	0.6156	0.1782	0.0973	-0.0681
107851	0.2949	-0.2596	-0.2064	0.5315	0.3101	0.102	0.4187	0.691	0.2219	0.2994	-0.0404	-0.0627	0.0744	0.1655	0.5557	0.1107	-0.2373	0.0155	0.2111	0.0379	0.0741	-0.1487	0.2985	-0.328	0.2813	0.1533	0.2329	-0.3961	-0.0937	-0.319	0.1188	0.0346	-0.094	-0.2942	0.0718	-0.1297	0.3843	-0.2523	0.4766	0.255	-0.3359	0.3782	0.0345	0.1963	-0.5269	0.038	0.2824	-0.024	-0.0735
107874	0.7436	0.0507	-0.3897	0.0666	0.3438	0.3445	0.5256	1.1009	0.4114	1.0909	-0.1535	0.0265	0.2701	0.0035	0.4783	0.2382	0.4252	0.3794	0.7521	0.4002	0.4754	0.0645	0.3095	-0.1135	0.5038	0.5516	0.1166	0.2577	0.5489	-0.7966	0.0936	-0.1785	-0.0803	-0.5156	-0.156	-0.4755	0.4757	0.3556	0.4723	-0.0186	-0.1979	0.5912	0.1266	0.312	-0.0749	0.5736	0.0036	-0.2156	-0.1534
107876	-0.2762	-0.5501	0.4777	0.0451	-0.0089	-0.4961	-0.1066	-0.5489	-0.2602	-1.07	-0.0486	0.3662	0.4358	0.2908	-0.686	-0.175	-0.29	0.0267	-0.1082	0.4114	-0.125	-0.2123	-0.101	0.1306	0.5727	0.067	-0.0201	-0.1813	-0.3437	0.4265	0.1674	0.5902	-0.0083	0.2846	0.3485	0.3026	-0.3555	-0.1496	-0.2036	0.2515	0.0351	-0.2277	-0.2139	-0.1538	0.0978	0.0888	0.2386	0.0206	0.2055
107897	-0.3133	-0.6461	-0.1794	0.1568	-0.0501	0.0477	0.1443	-0.1512	-0.7062	-0.0766	0.4304	-0.1337	0.1974	0.1547	0.1114	-0.2405	-0.0086	-0.0413	0.3982	-0.1219	-0.3177	0.1555	0.2726	0.1182	0.1688	0.2705	0.2706	-0.202	-0.4626	0.106	0.0509	0.2296	0.3364	-0.2892	0.0299	-0.3221	0.169	0.0486	0.1447	0.1522	-0.4577	0.0234	0.0723	0.3804	-0.5892	0.1574	0.4364	-0.1294	-0.0151
107924	0.1417	-0.3459	-0.4821	0.2528	0.0113	0.6353	0.2479	0.6534	0.1121	0.184	0.3287	0.15	0.0812	0.0271	0.4017	-0.3687	-0.1143	0.1539	0.2945	-0.296	-0.2648	0.0616	-0.416	-0.2638	-0.2343	0.2787	0.1508	0.2214	0.0848	-0.1935	-0.2293	0.1265	-0.2241	-0.0869	0.0144	-0.011	0.1965	0.6783	0.3043	0.1844	-0.6162	0.2208	0.03	0.3596	-0.004	0.605	0.1986	0.3069	0.2851
107957	0.2998	-0.1901	0.4038	-0.1772	0.0496	0.8664	-0.1242	0.6059	0.0865	0.3346	0.2771	0.1068	0.4948	0.2283	-0.1595	0.2116	0.4926	0.0675	0.2836	0.5341	0.115	0.2925	0.6913	0.5997	0.2331	-0.0383	0.2492	0.2896	0.6237	-0.1021	0.6624	-0.0004	0.4133	0.1292	-0.1097	0.2148	0.1623	0.4572	-0.0436	0.2596	-0.3151	0.0535	-0.0105	0.1741	0.242	-0.0893	0.4288	0.2315	-0.1146
107975	1.0562	-0.1446	0.1648	-0.1101	0.0671	0.4405	0.469	0.5133	-0.0253	0.6418	-0.5553	-0.1487	-0.1977	0.2056	0.8229	0.5373	0.4488	0.3152	0.2338	-0.5189	0.5668	0.3849	-0.0551	-0.348	0.7893	0.286	0.2119	0.2874	0.5782	-0.0866	-0.1303	-0.1646	-0.727	-0.3822	-0.8097	-0.5181	0.2293	0.8584	0.4073	0.1849	-0.3696	0.3795	0.2638	0.4944	0.3797	1.0859	-0.0831	-0.1013	-0.0007
107988	-0.1535	-0.4808	-0.0926	-0.2934	-0.2016	0.5468	-0.1134	0.0327	0.117	-0.3212	0.2273	0.1273	-0.0884	-0.1644	-0.131	-0.0986	0.0397	-0.0523	0.336	0.1077	-0.0542	0.239	0.1611	0.1599	0.1597	0.2153	0.1876	0.1794	0.0821	-0.1574	0.1619	0.2125	0.3733	-0.0103	-0.2066	0.1392	0.0356	0.3962	0.0681	-0.1219	-0.1196	0.3511	-0.0309	0.1048	0.0048	0.4131	0.1411	0.1236	0.057
107989	-1.7307	-0.5848	-2.5418	-2.084	0.5809	0.9562	-1.7121	0.3011	-0.1599	0.6241	0.8652	-1.7385	-2.0668	-1.8699	0.9404	0.5514	0.3595	0.9831	1.2933	0.0236	0.0342	-0.3878	-0.1587	0.483	-2.2183	0.5758	-0.1918	0.2054	0.9376	-1.9153	-1.7023	-1.7504	0.4317	-0.1602	-1.6289	-2.3604	1.065	0.412	0.8265	-0.2543	0.0061	1.1101	0.4196	-1.8014	-0.465	-1.679	0.8633	-0.0195	0.9129
107994	0.5593	-0.0255	-0.6111	0.218	0.1534	0.5276	0.7116	1.0689	-0.0186	0.9896	-0.1205	0.1614	0.1287	0.0234	0.7301	0.2573	0.2033	0.2349	0.6841	0.3316	0.2752	0.0744	-0.0979	-0.4779	0.9749	0.1494	0.0245	0.5846	0.8637	-0.2868	-0.0151	-0.402	-0.6621	-0.9981	-0.4134	-0.6014	0.5363	0.8339	0.876	0.1836	-0.4091	0.9147	0.1929	0.5793	-0.5001	0.6685	0.0282	0.423	-0.0496
107996	-0.417	0.3062	-0.0441	0.2611	0.3437	0.154	-0.1104	0.094	0.9663	-0.6627	-0.033	0.4312	0.386	-0.5347	-0.5092	0.1089	0.4351	-0.0341	-0.4136	0.3782	-0.1796	-0.0046	0.3474	-0.452	-0.6772	0.4132	-0.0709	0.8303	-0.1393	-0.1676	-0.4831	0.1622	-0.2653	0.7315	0.3804	0.1778	0.155	0.3764	-0.2923	-0.4335	0.0704	-0.4138	0.0533	0.4149	0.3256	-0.602	-0.0301	0.2715	0.2682
108044	-0.017	-0.3464	-0.4432	0.2439	0.0676	-0.0317	-0.043	-0.4751	-0.3094	0.1144	0.2213	-0.038	-0.1026	0.2086	0.1445	-0.1674	0.205	0.1313	0.2293	0.1249	-0.1565	0.1299	-0.1723	0.1382	0.1622	0.1903	0.32	0.2452	0.194	-0.067	0.164	0.1439	0.188	0.1536	-0.1222	0.1598	-0.1448	0.4473	0.0419	0.1416	-0.0271	0.3344	0.0262	0.3031	-0.2166	0.1131	0.2416	-0.0637	-0.0798
108045	-0.1492	-0.6657	0.0044	-0.0921	0.1889	0.339	-0.0049	-0.2349	-0.06	-0.0679	0.1684	-0.0948	-0.2122	0.0609	0.1443	-0.0034	-0.2002	-0.0735	-0.1423	-0.4991	-0.0748	0.3066	0.1505	0.2166	-0.0757	0.2008	0.2284	-0.0526	0.1011	0.4209	-0.0794	0.1802	-0.2358	0.1379	-0.3148	0.1743	-0.2458	0.6421	-0.3249	0.3091	-0.4694	0.0794	0.195	0.308	0.0795	0.0085	-0.1124	-0.0542	0.4581
108049	0.1413	0.1174	-0.3205	-0.42	-0.2101	0.7467	-0.357	0.7081	0.5422	0.9296	-0.2939	0.0557	-0.3229	0.057	-0.5236	-0.284	-0.0698	0.6809	0.1559	0.2324	-0.0425	-0.3349	0.0114	-0.2139	-0.078	0.4176	-0.549	0.2709	-0.1463	-1.2743	0.6291	-0.4959	-0.1722	-0.566	-0.285	-0.315	0.2176	0.0238	0.1243	0.1411	-0.0506	0.4656	0.2871	0.1182	-0.1791	-0.0831	-0.2368	-0.2197	-0.1438
108059	0.5214	-0.5241	0.5996	-0.6196	-0.2272	-0.3513	-0.233	-0.9134	-0.2356	-0.3012	-0.508	-0.1817	-0.6585	0.4132	0.6394	0.0716	-0.2436	-0.6125	-0.4748	-0.0793	0.148	0.19	0.1622	0.6609	0.1431	0.5661	-0.1754	0.1246	0.6755	-0.1086	0.0875	-0.1145	-0.0992	0.1405	-0.6351	0.5886	-0.595	-0.1496	-0.5729	-0.1454	0.3527	-0.3331	0.1595	0.196	0.1823	0.1342	-0.0217	-0.232	0.6672
108112	-0.244	-0.5128	-1.2235	-0.1439	0.049	0.1294	-0.269	1.9962	0.9517	1.7598	-0.463	0.0643	0.1573	-0.2402	0.3471	-0.2154	0.4347	0.8544	1.0418	1.1137	-0.4155	-0.7281	-0.0937	-0.2662	-0.412	0.4328	-1.129	0.2995	0.3709	-1.4996	-0.3095	-1.0375	-0.59	-0.4188	0.2636	-0.6963	0.8769	0.4604	0.8039	-0.5219	-0.3206	0.9958	0.614	0.3776	-1.0017	-0.5483	0.1283	-0.2065	-0.2496
108119	0.872	-0.8272	0.2128	-0.2507	0.0131	-0.1848	0.1836	-0.6793	-0.1334	0.059	0.2312	-0.1586	-0.0334	0.0735	-0.2603	-0.1206	-0.5201	-0.796	-0.1454	0.3778	0.0695	0.059	0.7456	0.6244	0.2323	0.6092	-0.0355	-0.595	-0.5351	-0.0598	0.1473	0.1276	-0.0677	-0.0399	-0.1249	0.0567	-0.1174	-0.1493	-0.9324	-0.1088	0.3783	-0.1192	0.2261	0.1782	0.3259	0.2325	0.3261	0.0136	0.7311
108133	-0.0166	-0.8073	0.0735	0.0905	0.0893	0.4159	0.2665	0.5956	-0.195	0.4547	0.2238	-0.0396	0.442	0.0771	-0.2249	0.4858	0.2043	0.492	0.5318	0.2841	-0.1549	0.1358	0.4344	-0.0492	0.2847	0.4756	0.3704	0.1629	0.4211	0.44	0.355	0.6108	-0.6884	0.3097	-0.0486	0.0809	-0.1012	0.9847	0.2009	0.2151	-0.3904	0.5014	0.1548	0.2487	0.6061	0.6927	0.0611	-0.1906	-0.2218
108144	-0.1266	-0.0904	-0.3098	0.0407	-0.0402	0.0285	0.3982	1.1011	0.3997	1.2877	-0.6381	0.1531	0.3935	-0.1273	0.1336	0.1587	0.6584	0.3529	0.773	0.9294	-0.0132	-0.4897	-0.1656	-0.1098	-0.1568	0.3032	-0.2256	0.5987	0.6928	-1.0469	0.1617	-0.4126	-0.0043	-0.3645	0.4039	-0.2604	0.6035	0.3881	1.0593	-0.1019	-0.3002	0.5774	0.562	-0.0125	-0.6569	-0.0981	0.3437	-0.2325	-0.0133
108162	-0.7764	-0.6298	-0.2824	-0.3553	-0.2491	0.1649	-0.1786	-1.4845	3.1639	-0.7951	-0.0374	0.0097	-0.2564	0.1423	-0.1718	-0.2925	-0.4037	0.0371	-0.3521	-0.1779	-0.3825	-0.136	-0.5239	-0.0371	-0.7475	0.1443	0.006	0.1116	-0.03	0.2385	-0.0407	-0.0325	-0.0037	0.0651	0.1083	0.1763	-0.063	0.1545	-0.3424	-0.3026	0.2592	-0.2814	0.108	-0.2015	0.27	0.1487	-0.105	-0.3908	0.4567
108175	-0.1923	1.0189	0.7586	0.2112	-0.3041	-0.475	-0.5423	-0.0112	-0.0694	-0.6691	0.3036	0.4958	0.1082	-0.2762	-0.5948	0.0885	0.0621	0.3365	-0.2575	0.5001	0.4818	-0.1138	-0.4616	-0.3872	-0.3337	-0.7805	-0.011	0.0651	-0.5356	0.6169	-0.5229	0.0581	0.0737	0.3816	0.2556	0.3486	-0.2459	-1.0441	-0.8985	-0.068	0.6041	-0.6157	-0.4499	-0.8908	-0.3482	-0.7976	-0.7814	0.4802	-0.2749
108187	-0.235	-0.1611	-0.322	-0.0112	0.1022	0.1622	-0.0111	0.1255	-0.0873	0.0592	0.0064	0.1418	-0.1669	-0.1151	0.0964	-0.1839	-0.1943	-0.0927	0.4428	0.0409	-0.0938	0.097	-0.0803	-0.017	-0.1363	0.0964	-0.1153	0.0628	0.1182	-0.0579	-0.2623	-0.0965	0.0393	-0.1716	-0.0404	-0.1606	0.486	0.0714	0.5493	-0.2944	-0.0222	0.2226	-0.365	-0.0095	0.2056	0.1533	0.0484	0.0856	0.0921
108218	-0.1703	0.0162	-0.6522	0.0652	-0.3426	-0.0414	0.0784	-0.8042	0.2308	0.1411	-0.1632	0.0208	1.4043	0.1102	-0.1222	-0.0057	-0.1216	-0.5481	-0.1614	0.3838	-0.1915	-0.0595	-0.0111	-0.1483	-0.085	0.3994	-0.46	-0.4072	0.2196	-0.496	-0.3923	-0.0058	0.1239	-0.2915	0.4562	-0.2834	0.2496	0.5667	0.6692	0.1832	-0.0946	0.405	-0.4331	-0.7889	0.156	0.4167	0.3856	0.0942	-0.083
108223	1.1551	-0.4178	-0.2024	-0.2165	0.1886	0.4964	0.5749	0.4631	0.11	0.5189	-0.4585	-0.2702	-0.1973	0.0054	0.8647	0.3709	0.145	0.117	0.3847	0.3119	0.4728	0.0772	0.2237	0.1469	0.8302	0.4137	0.0028	-0.2123	-0.0835	-0.1682	0.0154	-0.2703	-0.5288	-0.3829	-0.6942	-0.8083	0.3069	0.6163	-0.087	0.2219	-0.1049	0.58	0.3544	0.3078	0.3061	1.0831	-0.2176	-0.0797	0.1374
108230	-0.2921	-0.0087	-0.4185	0.2306	-0.1601	0.3465	0.0287	0.1261	0.0452	0.031	0.2445	0.1553	-0.0491	-0.1624	-0.118	-0.2172	0.0493	0.0486	0.255	0.0004	-0.1695	0.0304	-0.294	0.0055	-0.1544	-0.0785	0.1716	0.2592	0.3283	0.0607	-0.0008	0.0987	-0.0749	0.0608	0.022	-0.1883	-0.0003	0.4959	0.2952	-0.1086	-0.277	0.3276	-0.0342	0.2783	-0.0665	0.0985	0.0415	0.1634	0.175
108231	-0.3026	0.5357	-0.5166	0.235	-0.2388	0.3476	-0.0623	0.442	0.3027	0.9819	0.066	-0.0527	0.3788	0.1757	0.4975	0.323	0.1399	1.1474	0.2927	-0.4988	0.2378	0.3772	0.0925	-0.5806	0.8935	0.3146	0.2139	-0.3139	-0.5718	-0.0076	0.0931	-0.063	0.1593	-0.0396	-0.1058	-0.7175	-0.3688	0.5177	0.5286	0.3527	0.0807	-0.1119	-0.0751	0.4152	0.1694	0.5258	-0.0789	0.4011	0.0985
108301	-1.4357	0.5439	-0.182	0.0933	0.9052	-0.7144	0.2511	0.5883	1.2702	0.3458	-0.407	0.7472	0.1004	-0.5121	-0.1562	0.0728	0.0462	0.4206	-0.1074	0.8411	0.7219	0.4217	-0.0819	-1.0909	0.3608	-0.3469	0.4994	1.2894	1.3468	-0.9804	-1.0466	0.8231	-0.1343	0.6439	0.1613	0.3808	0.2995	0.7215	1.8434	-0.094	0.263	0.487	0.451	0.1152	-0.3989	0.9247	0.2914	0.9524	-0.3075
108339	-0.027	-0.2239	-0.5017	0.2058	0.1732	-0.0321	0.3094	0.1849	0.0199	0.6092	-0.6004	0.2161	-0.0412	-0.1424	0.3774	0.1539	0.4594	-0.1804	0.4249	0.3658	0.1911	-0.134	0.2101	-0.3304	0.1796	0.4762	0.2068	-0.1561	0.3562	-0.347	-0.2798	0.0281	0.2943	-0.0996	0.1539	-0.5746	0.5082	0.5185	0.9114	0.0757	-0.1158	0.9413	-0.2459	-0.2267	-0.4092	0.6689	0.3487	-0.1814	0.1526
108367	-0.1619	-0.1907	-0.3955	-0.148	0.0167	0.4171	0.0656	-0.251	-0.0238	0.0395	0.0458	0.1409	-0.3897	0.1126	-0.0488	-0.248	-0.1948	-0.0627	0.119	-0.544	-0.2151	0.0803	-0.199	-0.1145	0.0242	0.0477	-0.111	0.3187	0.5173	-0.0384	-0.0548	0.0707	0.0728	0.2046	-0.2876	-0.013	-0.2084	0.6147	0.2404	-0.1834	-0.3245	0.2959	-0.2099	0.1322	0.3519	0.2883	-0.0782	-0.0408	0.4481
108383	0.599	0.2385	-0.3076	0.2178	-0.1324	0.5885	0.3627	0.7332	0.2854	0.476	-0.5717	0.0362	-0.0589	-0.2232	0.3553	0.1573	0.3616	0.208	0.0859	-0.012	0.1027	-0.1696	-0.203	-0.1913	0.069	0.2123	-0.1697	0.6015	0.7686	0.1031	-0.2956	-0.4095	-0.0396	-0.1401	-0.5402	0.1417	0.2416	0.5502	0.2887	-0.0078	-0.5606	0.6258	-0.0041	0.1187	-0.1042	0.6019	0.1544	-0.2056	0.3162
108400	-0.1415	-0.0497	-0.7057	0.0761	0.03	0.1477	-0.2298	-0.2806	-0.2237	0.0338	0.1315	0.0673	-0.0853	0.1591	0.4815	-0.0409	-0.0161	-0.1471	0.0085	-0.0003	-0.08	0.1839	0.0606	0.0117	0.0428	0.344	0.0834	0.5987	0.0928	0.1113	0.5624	-0.0306	0.6482	0.0385	-0.0039	0.0437	-0.0531	0.0342	0.1142	-0.1039	-0.3083	0.0358	-0.2247	0.3068	-0.3346	0.2778	0.1845	-0.0667	0.2785
108403	0.1394	-0.6628	-0.4337	0.608	-0.0903	-0.0542	0.179	-0.2898	-0.5433	0.2791	0.0659	-0.3849	-0.2885	0.0167	0.5396	0.0528	0.0262	-0.2732	0.0134	0.3586	-0.1654	0.0726	-0.5156	-0.3101	0.6236	-0.0446	-0.0623	0.06	0.022	-0.1125	-0.1887	0.0725	-0.5586	-0.1997	0.0596	-0.2677	0.3535	0.2394	0.2636	-0.3612	-0.0636	0.7911	-0.1301	-0.2131	-0.4103	0.4823	0.3854	0.1946	-0.0888
108418	-0.015	-0.1783	0.1371	-0.1039	-0.1303	0.3333	0.093	0.026	-0.2147	-0.294	0.2354	-0.0195	-0.0755	0.0459	-0.0559	-0.0912	-0.2265	-0.3109	-0.2372	0.0426	-0.2237	0.2327	0.021	0.164	0.0005	0.0903	0.1944	0.1863	0.5226	0.152	-0.0981	0.2177	0.2931	-0.1146	0.0042	0.0153	0.0923	0.2944	-0.2067	0.057	-0.2253	-0.1064	0.1505	0.0812	-0.032	0.4009	0.0078	-0.1461	0.1133
108419	0.1135	-0.1316	0.044	0.1057	0.5258	0.2522	0.3147	0.0396	-0.2543	-0.1952	0.47	0.1835	0.1517	0.1628	0.3975	0.0954	-0.2391	0.0837	0.3646	-0.0798	0.1852	0.3399	0.2825	0.1365	0.378	0.5002	0.4186	0.3431	0.3367	0.4038	0.1222	0.3312	0.3189	0.1698	-0.2736	-0.0712	0.082	0.7431	-0.3958	0.0494	-0.3655	0.1058	0.343	0.7307	0.0602	0.4602	0.4807	0.3503	0.1571
108442	0.0158	0.7884	0.9389	0.7109	-0.0312	0.6864	0.2738	-1.0009	0.3751	0.5638	-0.5575	0.4606	0.7045	0.5101	-0.8856	-0.3615	0.987	-0.2276	0.2928	1.2679	-0.6063	-0.2094	-0.2414	0.561	0.1497	0.6251	-0.0911	1.008	0.6313	-1.1275	0.3207	-0.5291	0.4369	0.2403	0.0191	0.1301	1.1547	1.0616	2.444	0.7955	-0.3967	0.0993	0.1441	0.3612	-1.1359	-0.1821	0.4362	-0.7932	0.7951
108451	0.5472	-0.2029	-0.6748	0.2073	0.3545	-0.1839	0.5809	0.4886	-0.7184	0.2561	0.4761	-1.1168	0.7905	0.1736	0.6995	-0.1755	-0.3211	0.9135	0.6009	-1.1189	-0.1369	-0.3875	0.5438	-0.1438	0.5459	0.3337	-0.0266	-0.4249	-0.3725	-0.3643	-0.0829	-0.345	-1.0007	-0.8549	0.3632	-1.375	0.3337	-1.4629	-0.2297	0.0056	-0.2061	-0.2555	0.6593	0.6887	-0.4643	-0.1845	0.8011	-0.2744	-0.6705
108456	-0.2058	-0.1654	-0.0812	0.1753	-0.0084	0.0017	0.0251	-0.4358	-0.2221	-0.1118	0.45	0.2555	0.1527	0.2017	0.5375	0.0933	0.0973	-0.2485	0.0457	-0.0225	-0.0316	0.3131	-0.03	0.2932	-0.0071	0.064	0.3703	0.4127	0.4128	0.415	0.2607	0.1765	0.1141	0.2305	-0.0378	0.6387	-0.4918	0.6847	0.003	0.0142	-0.1559	0.2321	0.0246	0.1637	-0.0332	0.2762	0.2686	0.1556	0.5318
108493	0.1423	1.1332	0.9673	0.4867	0.2483	0.4507	0.7722	-0.7162	0.3624	-0.3037	-1.3171	-0.1063	0.6697	0.2126	-0.7344	-0.053	0.668	-1.1075	0.3582	1.2362	-0.6821	0.7249	0.0402	0.8677	0.5331	0.2253	0.7207	0.724	1.3017	-0.3173	0.4721	0.1066	0.0448	0.2223	0.0353	-0.5787	0.1628	1.4954	2.0935	1.3971	-0.4633	-0.209	-0.5569	-1.3099	-0.7277	0.3673	0.9195	-0.4919	0.0244
108523	0.1741	-0.213	-0.5469	0.2981	0.0555	-0.2202	0.0216	0.5358	0.0321	0.3527	0.0257	-0.6079	-0.145	0.0676	0.4586	-0.0945	0.1236	0.0157	0.2339	0.4223	-0.2126	-0.0598	0.0529	-0.0587	0.0795	0.2125	-0.1907	-0.3327	-0.4721	-0.5036	-0.5051	0.109	-0.2471	-0.0957	-0.0819	-0.5032	-0.1409	0.351	0.5428	-0.0393	-0.019	0.4123	0.0291	-0.1798	-0.2742	0.4633	0.2012	-0.3342	0.2515
108545	-0.2373	0.1066	-0.418	0.3064	-0.0336	0.56	0.1372	-0.4545	0.1059	0.0897	0.4624	0.3573	-0.1774	-0.1773	-0.3497	-0.1625	-0.2548	-0.3673	0.4749	0.1568	-0.1891	0.4544	-0.0009	-0.0519	0.1034	0.3724	0.4994	0.6573	0.5058	-0.1322	0.2153	0.1661	0.044	0.1384	-0.3045	0.2273	0.2521	0.8475	1.0312	0.2665	-0.3736	0.5614	0.0232	0.3862	-0.3216	0.7015	0.1376	0.2087	0.6199
108572	0.3765	0.0002	-0.0398	-0.104	-0.1137	0.0845	0.2708	0.0889	0.0849	0.1236	-0.6705	0.1866	-0.2628	0.2296	-0.041	0.2762	0.1669	-0.6064	-0.36	0.2989	-0.4258	-0.0756	0.1462	-0.0041	-0.1899	0.2927	0.2411	-0.2919	0.2408	-0.3205	0.1156	-0.1953	-0.0289	-0.011	-0.1946	0.5782	-0.0487	0.5994	0.4474	0.1204	-0.2512	0.8784	0.0497	-0.699	-0.1104	0.4536	0.2856	-0.102	0.5294
108594	0.1423	-0.0711	-0.3949	0.1267	0.239	0.2795	0.5477	0.1934	-0.0912	0.0982	-0.0621	0.0625	0.0368	0.0486	0.4993	0.2018	0.2015	-0.128	0.5825	0.1796	0.0144	0.1872	0.2462	-0.0103	0.2365	0.4155	0.246	-0.1107	0.6964	-0.0024	-0.2074	0.0848	0.0351	-0.2566	-0.0314	-0.3969	0.2424	0.6221	0.3603	0.0922	-0.2165	0.3275	-0.0173	0.2054	0.0175	0.6055	0.2838	0.0479	-0.1296
108602	-0.1641	0.1715	-0.1834	-0.3338	-0.2472	-0.1472	-0.1721	-0.2277	0.01	-0.1227	-0.264	-0.3698	-0.1838	-0.3497	-0.429	-0.2044	0.1447	-0.0079	-0.2007	-0.397	-0.3301	-0.1081	-0.3677	-0.1788	-0.3952	-0.5105	-0.17	-0.1273	0.0682	0.0536	-0.1824	0.0369	-0.0058	-0.1762	0.1083	0.1964	0.151	-0.0393	-0.1715	0.0488	0.0421	-0.0767	-0.3847	-0.291	0.3979	-0.1861	-0.2117	0.0285	0.0695
108628	-0.217	-0.2299	-0.2671	0.1572	-0.3191	0.399	-0.1346	0.672	0.5184	0.4521	0.1155	-0.0274	-0.2946	-0.2271	0.1929	-0.124	0.048	0.0844	0.4651	0.3964	-0.3437	0.0998	-0.0343	-0.014	-0.4541	-0.0369	0.0082	0.3076	0.4877	-0.1447	0.014	0.3016	0.5163	-0.2625	0.0077	0.355	0.3228	0.142	0.3745	-0.2785	-0.1502	0.5768	-0.1852	0.142	-0.0835	0.0778	0.1044	-0.2209	0.0955
108645	-0.2888	-0.6608	-0.4726	0.1298	-0.0747	0.3303	0.0762	0.5591	-0.1003	0.3684	0.3926	-0.034	0.0917	0.0622	0.2581	-0.3814	-0.0893	0.3674	0.5892	-0.0679	-0.219	-0.1777	0.0493	-0.122	-0.0629	0.2274	0.0092	-0.1225	-0.7883	-0.4312	-0.0326	0.12	0.1253	-0.3559	0.2444	-0.5753	0.5511	-0.0652	0.1764	-0.0138	-0.3967	0.1301	0.0883	0.3976	-0.5045	0.0567	0.1378	-0.3173	-0.0358
108648	-0.1481	0.726	0.9603	0.0878	0.3794	-0.9196	-0.2701	-0.5248	-0.3548	-0.6886	0.1329	-0.3946	0.6103	-0.0815	0.0178	0.0368	-0.3068	0.1528	-0.3684	-0.5475	0.2258	-0.0854	-0.0822	-0.2447	0.0089	-1.0281	-0.0813	-0.2973	-0.1514	0.593	-0.3433	0.0716	-0.1728	0.4903	0.5397	0.3794	-0.2564	-0.9384	-0.5194	0.1847	0.4736	-0.9598	-0.1964	-0.682	0.0505	-0.9294	-0.3116	0.5941	-0.6931
108672	0.3299	2.865	1.2283	-0.7604	0.3221	-0.8989	-0.0067	1.2256	0.7821	-0.2121	-0.8049	0.2592	0.0519	0.0913	-0.171	0.1148	-0.0042	1.2419	0.1202	-0.3455	-0.0105	-0.9381	-0.8335	-0.6667	-1.5561	-1.6793	-0.6939	0.2142	-0.5226	-0.5401	-1.6279	-0.7893	-0.4997	-0.6005	0.4889	-0.8918	0.5348	-1.8528	0.0237	-0.9683	0.8412	-0.2421	-0.7538	-0.4498	-0.4863	-1.2365	-0.6321	0.3762	-1.5187
108678	0.1632	-0.0923	0.0411	-0.0551	0.0078	0.7587	0.3212	0.5881	-0.1006	0.0828	0.3767	0.2084	0.1472	0.0768	-0.0307	-0.0688	-0.0997	0.0343	0.2523	-0.6584	0.0553	0.5717	0.3866	-0.0636	-0.034	-0.0104	0.544	0.3267	-0.7513	0.1431	0.5775	0.5182	0.0681	-0.1273	-0.0568	-0.3026	0.0378	0.3779	0.2792	0.3645	-0.7839	-0.2326	-0.1411	0.7341	-0.2706	0.5602	-0.0264	-0.1707	0.6823
108702	-0.4151	0.6753	0.5705	-0.1114	0.0055	-0.166	-0.576	0.4049	0.4822	-0.3307	0.0616	-0.0231	-0.1658	-0.227	-0.4507	-0.0258	0.2787	0.5101	-0.1671	-0.2133	-0.26	0.1327	-0.009	-0.5029	-0.7396	-1.275	-0.2173	-0.2641	-0.7914	0.3855	-0.6219	-0.3571	0.1415	0.2133	0.2949	0.0544	0.4399	-1.0983	0.6337	0.037	0.4899	-0.4127	-0.7301	-0.3229	0.4717	-0.7592	-1.2889	-0.0845	-0.2083
108704	0.3632	-0.4238	0.1505	0.3089	0.1124	0.0763	0.1415	0.0071	-0.0426	-0.1139	-0.0756	0.0826	-0.1077	-0.1132	-0.2222	0.1297	-0.4676	-0.3493	0.076	0.0669	-0.1689	0.2111	-0.2093	0.0428	0.0939	0.4771	-0.1206	0.3151	0.2779	-0.0503	0.236	0.3163	0.0536	-0.1579	-0.3888	0.1332	-0.0166	0.4843	-0.0756	0.0141	-0.0845	0.1384	0.4774	-0.4416	0.1837	0.6024	-0.4482	0.0439	0.2807
108716	-0.305	-0.1133	-0.1058	-0.1819	-0.1441	-0.007	-0.3265	-0.9155	0.4642	-0.2628	0.2738	0.1779	-0.4014	0.2466	0.4086	-0.5784	0.3905	-0.1254	0.2641	0.1053	0.1854	0.3745	-0.2318	0.2013	0.0105	0.1886	0.005	0.8631	0.6853	0.4311	0.135	0.3103	0.4271	0.2087	-0.0927	0.3819	0.0449	0.6523	0.0551	0.0565	0.0034	0.3468	0.0084	0.5478	-0.745	0.3295	0.335	-0.0201	0.8237
108718	1.075	-0.3783	0.1938	-1.0424	-0.4545	0.4204	0.3286	0.1065	-0.5306	0.1865	0.1352	-0.5561	-0.5423	0.1742	0.1631	0.281	0.0848	0.6627	-0.2636	0.0635	0.212	-0.0927	0.0716	0.0741	0.9355	0.4333	-0.2458	-0.1117	0.2781	-0.291	0.8573	-0.6867	-1.4003	-0.368	-1.1105	-0.2693	0.0167	0.4413	-0.6002	-0.2813	0.1177	0.2302	0.7347	0.3911	0.3073	0.5523	-0.145	-0.2276	-0.1841
108743	0.0436	0.012	-0.1896	-0.4594	-0.2263	0.5741	0.0418	-0.2458	0.2082	-0.2575	0.0357	-0.1343	-0.2736	0.2332	0.0015	-0.0053	0.2134	-0.2197	-0.0804	0.0729	-0.0804	0.0917	0.1584	0.118	0.3687	0.2984	0.0971	0.1842	0.7094	0.1822	0.602	0.1661	0.3056	-0.0467	-0.5989	0.2077	-0.4677	0.2394	-0.2099	0.0754	0.032	-0.1479	-0.012	0.1969	0.2119	0.1691	0.2065	0.1021	0.2009
108756	0.3137	-0.2105	-0.5024	0.2291	0.2484	0.1219	0.2446	0.0757	0.3879	0.1022	-1.0134	0.2296	-0.5125	-0.1661	-0.5152	0.0336	-0.0508	-1.4308	-0.5319	0.7188	-0.5468	-0.6932	0.3754	-0.1424	-0.1348	0.2537	-0.3736	-0.9667	0.8272	-0.8209	0.0627	-0.4506	-0.6044	0.3	-0.0902	-0.2823	0.0151	0.7916	0.7252	0.1987	0.2369	0.9792	-0.0004	-1.05	-0.2561	0.6064	-0.0701	-0.4722	0.4228
108775	-0.4346	-0.0557	0.1347	-0.4055	-0.1912	0.2797	-0.435	-0.0492	0.0674	-0.4892	-0.1174	0.1669	-0.1242	-0.067	-0.4007	-0.0826	-0.1127	-0.3647	0.0026	-0.5114	-0.3715	0.0047	-0.2572	-0.2157	-0.5835	-0.2951	0.1137	0.1644	0.2172	0.15	-0.2217	0.1209	-0.1171	0.1455	-0.0557	0.0509	-0.3703	-0.1328	-0.2693	0.0761	-0.1673	0.0852	-0.484	0.0777	-0.1395	-0.1984	-0.0708	0.0499	0.279
108801	-0.1792	0.1076	0.1779	-0.0644	-0.158	0.2793	0.2283	-0.2772	-0.1637	-0.0365	0.1131	0.15	-0.2019	0.2401	0.3196	0.0455	-0.021	-0.1237	0.1815	0.2519	-0.0691	0.2992	0.1175	0.1709	0.1069	0.4686	0.1255	0.3363	0.4461	-0.0728	0.1186	-0.0047	0.2442	-0.2881	-0.1618	-0.296	0.1288	0.4157	-0.1088	0.1293	-0.2228	0.3606	0.3444	0.3691	-0.2269	0.2929	0.3152	0.0534	0.0097
108835	-0.6713	-0.5356	-0.8356	0.0161	-0.0237	-0.0602	-0.317	1.1374	0.5299	1.2451	-0.2267	-0.0014	-0.2127	-0.1984	0.4338	-0.4125	0.3358	0.5815	0.9366	0.6416	-0.3602	-0.4462	-0.3866	-0.153	-0.3811	0.2792	-0.8758	0.4571	0.1938	-1.1499	-0.4293	-0.8252	-0.1037	-0.5162	0.4936	-0.579	0.881	0.1996	0.7355	-0.5397	-0.4168	0.8014	0.2724	0.1952	-0.9969	-0.658	0.1017	-0.1199	-0.3551
108893	-0.1891	0.8062	1.096	0.2368	0.3964	-1.1303	-0.4357	-0.6003	-0.6906	-1.3015	0.3299	-0.2295	0.5256	-0.1202	-0.3328	0.2892	-0.2837	0.3518	-0.403	-0.8012	0.3204	0.0174	0.2037	-0.1254	0.141	-1.579	0.1853	-1.0616	-1.367	0.8417	-0.4868	0.1458	0.0871	0.416	0.5435	0.3497	-0.3953	-1.671	-1.2098	0.358	0.8872	-1.7423	-0.1664	-0.6599	0.5793	-1.004	-0.418	0.554	-1.3936
108931	-0.7017	0.5708	-0.6452	0.2323	0.2046	0.1988	0.8571	0.1161	0.3511	0.1685	-0.1817	0.7251	0.0394	0.1061	0.6259	0.2031	0.0474	-0.2334	0.0681	0.2153	0.4019	0.4222	-0.6578	-0.6081	0.2037	0.1626	0.5072	0.4071	0.9424	0.3012	-1.1167	-0.0643	0.1094	-0.0326	-0.156	0.9021	-0.0559	0.9026	0.4811	-0.1175	-0.2308	0.6997	0.3244	-0.1521	0.196	0.8048	-0.1788	0.2479	1.0332
108940	0.1808	-0.6438	-0.2772	-0.0902	0.1359	0.2082	0.2996	-0.1107	-0.206	-0.2043	0.0238	-0.1018	0.0843	-0.1794	0.4401	-0.0258	-0.0428	-0.4441	0.3846	0.0931	0.0483	0.4413	0.2521	0.1013	0.3569	0.5864	0.5101	0.2517	0.317	0.0414	-0.1425	0.0793	0.1281	0.0336	-0.2914	-0.3363	0.104	0.4596	-0.1968	0.0718	-0.5134	0.1924	0.1762	0.6539	0.2223	0.5285	0.2497	0.0001	0.0208
108944	0.1287	-0.4598	0.1399	0.0017	-0.2675	0.0115	0.0856	-0.808	0.1563	-0.2857	-0.365	0.2144	-0.7076	-0.2603	0.5543	-0.2721	-0.3983	-0.5942	-0.6629	-0.0586	-0.0089	-0.0326	-0.281	0.8518	-0.4391	0.1738	-0.5136	0.4991	0.5765	-0.2369	0.4267	-0.0274	0.6135	0.2198	-0.5653	0.5715	-0.0664	0.2628	-0.5763	-0.1184	0.5264	-0.0875	0.4532	0.0474	0.0212	0.7077	-0.828	-0.1147	0.7379
108946	-0.1984	0.1663	0.0938	-0.1977	0.208	0.129	0.2493	-0.1117	-0.0514	0.2545	-0.0453	0.0516	0.0703	0.2117	-0.0884	-0.188	0.3375	-0.1253	0.1716	0.0624	0.0108	0.2219	0.5341	0.2341	-0.2405	0.4448	0.3293	0.6178	0.724	0.1097	0.1958	0.2346	0.3792	0.1908	-0.0315	0.2354	-0.0908	0.6453	-0.3524	0.2943	-0.1522	0.5211	0.0501	0.3817	0.1851	0.2814	0.5854	0.2794	0.7482
108964	0.8756	-0.0454	0.2036	-0.3578	0.083	0.5351	0.074	-0.0518	0.1993	-0.0565	-0.4054	-0.1906	-0.7317	0.0774	0.2172	0.2208	-0.2275	-0.0618	-0.4199	-0.9214	0.1319	-0.1934	0.1089	0.3283	0.6636	0.4282	-0.0985	-1.8446	0.0164	-0.6321	0.1886	-0.3409	-0.3993	-0.4622	-0.7098	0.3042	0.0038	-0.0693	0.255	0.1029	-0.2293	-0.1076	-0.0483	-0.1036	0.5005	0.9246	-0.6181	-0.9907	0.0958
108971	-0.1445	0.004	-0.9797	-0.4267	0.1901	0.2936	-0.1188	1.0049	0.2134	0.0524	0.0622	0.1362	-0.4661	-0.0749	0.1005	-0.1531	-0.3863	-0.2185	0.8161	0.3315	0.225	0.0514	-0.5115	-0.2675	-0.1333	0.2263	-0.7692	0.1411	0.4105	-0.3187	0.1284	0.1489	-0.6589	0.3227	0.2437	0.1052	0.3241	0.4335	0.1717	0.7255	-0.789	0.3409	-0.0698	0.7894	-0.6224	-0.2811	0.2156	-0.4574	-0.1314
108974	-0.1472	0.1195	-0.1357	-0.0161	0.1537	0.3522	0.307	0.1202	-0.266	-0.0674	0.4463	0.35	0.3429	0.1483	0.1954	0.0581	0.0331	-0.1458	0.2692	0.2074	0.0412	0.2606	0.5575	0.2219	0.3252	0.4265	0.4168	0.2622	0.2599	0.3218	-0.0095	0.2059	0.2771	0.2954	-0.0339	-0.1045	0.0462	0.3963	0.0604	0.1293	-0.1134	0.1268	0.2703	0.4442	-0.017	0.5925	0.6181	0.3514	-0.0479
109003	0.1085	-0.3184	-0.7817	0.2826	0.2519	0.4499	0.3979	0.8872	0.3513	0.7616	0.4163	-0.0879	0.0319	-0.0822	0.196	-0.1844	-0.2554	0.182	0.692	0.287	-0.274	-0.3916	-0.025	-0.2452	0.0945	0.256	-0.0611	0.3518	0.3713	-0.5118	-0.1486	-0.3161	0.037	-0.6863	0.0243	-0.4658	0.7819	0.2484	0.5079	-0.0998	-0.5228	0.5363	0.2978	0.4461	-0.1749	0.2864	0.5079	-0.086	0.3027
109024	-0.3853	-0.6744	-0.9018	0.2288	-0.1089	0.1603	-0.2095	0.7867	0.3105	1.1868	-0.0682	0.0654	0.141	0.0295	0.8103	-0.4988	0.3355	0.3698	0.8412	0.1928	-0.3014	-0.4065	-0.2035	-0.026	-0.2438	0.1936	-0.375	-0.2523	-1.651	-0.812	-0.2437	-0.4615	-0.0586	-0.6897	0.3	-0.2536	1.1641	-0.3906	0.3664	-0.7246	-0.6886	0.4039	0.2165	0.1739	-0.6498	-0.0718	0.2232	-0.3756	0.1676
109042	-0.7197	-0.3093	0.1682	0.2936	-0.1296	-0.3108	-0.3563	-0.6216	-0.6693	-0.3963	0.1496	-0.1066	-0.1904	0.5928	0.0978	-0.3878	-0.0081	-0.3697	-0.6786	-0.0059	-0.0126	0.0584	0.1181	0.2383	-0.3138	0.5346	-0.2333	-0.192	0.5856	0.3164	0.4705	-0.0425	0.2431	0.3404	-0.0069	-0.022	0.0029	-0.3513	-0.4106	-0.405	0.4952	-0.256	-0.2729	-0.3172	-0.6781	-0.442	0.2391	-0.3471	0.6262
109048	-0.3564	0.3591	0.4535	0.0134	0.4223	-0.3197	-0.1364	-0.1333	-0.1234	-0.3929	0.249	0.0018	0.0714	-0.2811	-0.3032	-0.1277	-0.3797	0.419	0.0533	-0.5276	0.2297	-0.2177	-0.165	-0.2012	-0.2584	-1.2973	-0.2776	-0.4389	-1.3871	0.4451	-0.3312	-0.0275	-0.0944	0.3855	0.3365	0.4146	-0.2719	-1.6737	-0.7264	-0.1154	0.542	-0.765	-0.2822	-0.4351	0.6545	-0.8012	-0.8647	0.31	-0.8765
109080	-0.3078	-0.0875	0.3311	-0.1781	-0.0355	-0.3386	-0.288	-0.735	-0.0433	-0.9477	0.0459	-0.3912	-0.1353	0.2056	-0.077	0.2714	-0.0917	-0.0549	-0.5585	0.1342	0.0563	0.0013	0.1459	-0.0619	0.1224	-0.1391	-0.2535	-0.1206	-0.6095	0.465	0.2951	0.2851	0.1925	0.2248	0.1798	0.4838	-0.7458	-0.2509	-0.6399	-0.011	0.3388	-0.6759	-0.0047	-0.0344	-0.0371	-0.2766	-0.0391	-0.1036	0.1627
109088	-0.6597	0.1877	-0.0717	-0.1466	0.0319	0.4827	-0.2667	-0.1269	0.264	0.1652	0.2346	0.3697	-0.1008	0.115	0.1158	-0.3103	0.2935	-0.219	-0.0399	0.0217	-0.2506	0.2172	0.1086	-0.145	-0.1954	0.0872	0.7591	0.1407	0.5425	0.9674	0.3602	0.3562	0.3116	-0.2099	0.0305	0.8439	0.0843	0.6435	0.3232	0.2124	-0.1827	0.3328	-0.3069	-0.4959	-0.2611	0.1271	0.0713	-0.255	0.3848
109100	0.2876	-0.0644	-0.5246	-0.6429	-0.2062	-0.2565	-0.8611	0.6284	1.3719	1.1923	-1.0535	-1.1568	-0.5665	0.3822	-0.1527	0.6213	0.6107	0.8004	-0.1241	0.3208	0.3644	-0.6795	-0.1076	0.6076	-0.0057	0.2381	-1.1289	0.1749	0.3671	-1.4433	0.9589	-0.6882	-0.1336	-0.8083	-0.4669	-0.221	0.3518	-0.2975	-0.7901	-0.0738	-0.0904	0.5571	0.4868	0.0517	-0.0927	-0.8974	-0.6842	-0.7934	0.4146
109106	-0.536	-0.565	-0.9373	-0.1124	-0.0397	0.0877	-0.2171	1.6654	0.5398	1.3597	-0.4533	0.1082	-0.0532	-0.3386	0.4309	-0.1994	0.4128	0.606	0.9041	0.5909	-0.4792	-0.6382	-0.2622	-0.212	-0.4198	0.5283	-0.9852	0.3733	-0.2476	-0.9961	-0.3268	-1.0182	-0.2917	-0.5821	0.4362	-0.712	0.8432	0.136	0.6871	-0.5392	-0.3327	0.7921	0.3426	0.4101	-0.9457	-0.3885	-0.1286	-0.3786	-0.2714
109122	0.2725	0.5738	-0.2756	-0.2891	-0.3482	0.773	0.2393	-0.0611	-0.056	-0.3327	0.2531	0.0854	0.3352	0.3028	-0.167	0.1501	-0.0048	0.0736	0.1123	-0.5632	0.0765	0.2937	0.2186	0.1698	0.5177	0.2061	0.3131	0.2142	-0.7948	0.1041	0.659	-0.0084	0.3093	0.0578	-0.2976	0.0665	-0.1772	0.3058	-0.0273	0.3897	-0.2668	0.646	0.4002	0.4616	0.2875	0.7342	0.0509	0.4116	-0.156
109150	0.4862	-0.4065	0.1047	-0.1287	0.035	0.1792	0.3763	-0.0481	-0.1962	-0.0345	0.1186	-0.1894	-0.1986	0.2238	0.2014	0.1645	-0.545	-0.1387	-0.0641	-0.3903	0.0516	0.2295	-0.0911	0.1459	0.1504	0.4291	0.2372	-0.3931	-0.1152	0.0154	0.0209	0.0957	-0.4358	0.0123	-0.6589	-0.3198	-0.2471	0.3558	-0.6316	0.1059	-0.0202	0.1719	0.4145	0.1971	0.2939	0.7477	-0.0837	-0.2881	0.2342
109180	-0.1256	0.2868	0.4081	0.109	-0.1897	0.0201	0.0786	0.2311	-0.4055	0.1094	-0.0822	0.5114	-0.2313	-0.0392	-0.0144	0.0888	0.0584	-0.1067	0.3485	-0.0072	-0.2453	0.2668	-0.15	-0.1332	-0.0893	-0.2607	0.2981	0.2305	0.6884	0.0292	-0.1933	-0.0786	0.3012	-0.3561	-0.1379	-0.5341	0.3392	0.3874	1.1172	-0.3596	0.1114	-0.0074	-0.4353	-0.2399	-0.219	0.2736	-0.0039	0.3132	0.2706
109200	-0.0684	0.4286	-0.3223	0.0461	0.3615	0.1138	0.1674	0.6233	0.1749	0.424	0.0524	-0.257	-0.4824	-0.2729	0.0605	0.001	0.1388	0.4112	0.4776	0.2309	0.4254	-0.1177	-0.2724	-0.2716	-0.399	0.2728	0.15	0.4999	0.0219	-0.4551	-0.2156	-0.1602	-0.055	0.2086	-0.355	0.1474	-0.1831	0.3248	-0.1297	-0.2101	0.0213	0.7196	0.4205	-0.1266	0.1875	0.3438	0.4551	0.265	0.0127
109212	-0.3074	0.8295	0.9236	0.3365	-0.1882	-0.9298	-0.3867	-0.2987	-0.0508	-0.749	-0.2314	0.2421	-0.0067	-0.5156	-0.2115	0.2711	0.4565	-0.1198	-0.3869	-0.5165	0.3152	-0.1581	-0.3739	-0.3135	-0.2024	-1.2291	-0.0276	0.1261	-0.4457	0.8244	-0.3225	-0.0428	0.085	0.6076	0.2458	0.5239	-0.075	-1.3564	-0.3157	0.0673	0.8155	-0.8867	-0.4991	-0.8481	-0.0275	-1.2296	-0.6336	0.1037	-0.292
109219	-0.1835	-0.532	-0.4718	0.1286	-0.0018	0.0043	-0.0656	-0.9439	0.4899	0.3074	-0.005	-0.3716	-0.3969	-0.0861	-0.1739	0.3105	0.1125	-0.4734	-0.5789	0.216	-0.2277	-0.085	0.0107	0.1312	-0.018	0.2487	-0.0798	-0.3857	0.3648	-0.1652	0.0844	-0.3062	0.3784	-0.0872	0.105	0.3032	-0.1216	0.5473	0.6197	-0.2383	-0.2352	0.4596	-0.1121	-0.4534	-0.0516	-0.073	0.1351	-0.4757	0.6546
109221	-0.2462	0.2418	0.4626	0.1139	-0.0722	-0.7111	-0.0564	-0.4971	-0.1984	-0.8907	0.2459	0.2105	0.0295	0.2189	-0.1195	0.1421	-0.4164	0.1268	-0.3469	0.6297	0.2661	0.0033	-0.03	-0.1468	0.085	-0.2275	0.0804	-0.3643	-1.1586	0.4318	-0.1322	0.0409	-0.1745	0.1594	0.3489	0.0731	-0.1451	-0.8829	-0.5071	0.1538	0.2529	-0.5796	0.0025	-0.573	-0.0614	-0.3223	0.0205	0.1022	-0.5318
109238	0.2441	0.056	-0.1192	0.1195	0.0759	0.4055	0.6288	0.4364	0.1753	0.3855	-0.0499	0.3161	0.1572	0.0376	0.6129	0.1818	0.6789	0.0522	0.5057	0.093	0.2886	0.4549	0.2166	0.1431	0.3981	0.3883	0.3724	0.4038	0.672	0.0116	0.0801	0.1122	-0.0892	-0.1624	-0.2021	-0.1296	0.1437	0.7294	0.4178	0.2594	-0.4958	0.5452	0.0481	0.5259	0.2531	0.7342	0.2077	0.1793	0.3206
109240	0.0411	1.3273	0.5168	-1.1169	-0.0164	0.3362	-0.3991	0.772	0.6789	0.3409	0.412	-0.4089	-0.2769	-0.9927	-0.2064	-0.0484	0.8195	0.4564	0.029	0.0048	-0.3451	0.4623	0.0021	-0.0819	-0.42	-0.71	-0.9256	-1.1687	1.0783	-0.5886	-1.232	-0.2397	-0.0766	0.8458	1.1011	0.1909	0.6925	-0.8982	-0.3948	-0.3166	0.6076	-1.6448	0.0357	-0.3781	-0.0881	-0.2413	-1.2507	0.3341	-0.5864
109289	0.243	-0.2109	-0.1557	-0.1437	-0.0977	0.6448	0.0408	0.1104	0.0831	0.256	0.1862	0.0749	0.1284	-0.0547	0.137	-0.2233	0.3413	-0.3429	0.2304	0.0996	-0.1375	0.0746	0.1583	0.126	-0.3423	0.176	0.1904	0.5449	0.498	-0.1511	0.0377	0.0705	0.2273	0.0063	-0.0606	0.0544	0.1268	0.7525	0.317	0.0356	-0.4587	0.3958	0.0198	0.105	0.0169	0.4042	0.1111	0.14	0.4133
109306	-0.0714	-0.0344	-1.6839	0.4984	0.9057	0.634	0.716	1.1331	1.1384	0.8281	-0.1865	-0.3735	0.4004	-0.7814	0.3357	-0.0073	0.036	0.5637	0.5574	1.0143	0.0944	-0.6455	-0.2936	-0.2381	-0.7343	0.2458	-0.4053	0.4321	0.427	-1.5367	-1.0451	-0.6316	0.0373	-0.194	0.1059	-0.2317	0.5185	0.1368	1.0428	-0.8446	0.0594	0.4134	0.7023	-0.3612	-0.4227	0.3692	0.478	-0.4864	-0.1212
109321	0.2856	0.6607	-0.5313	0.5379	0.4902	0.2039	0.4737	-0.2908	0.169	0.4026	-0.092	0.788	0.3683	-0.1988	0.1241	0.3359	0.2555	0.3605	0.257	-0.0722	0.529	0.5997	-0.1603	-0.7168	0.4727	0.3747	0.2023	0.8247	1.0777	-0.561	-0.9472	0.3978	0.0135	0.0793	0.1065	-0.6586	0.5717	0.6641	1.6464	0.5056	0.1644	0.9151	0.3518	0.3384	-0.2269	0.8268	0.496	0.4205	0.1347
109325	0.7624	-0.3664	-0.2502	-0.1585	0.1698	0.2756	0.6488	0.4992	0.1079	0.6404	-0.1682	-0.2615	-0.1127	0.1349	0.5455	0.1602	0.0766	0.3335	0.5301	0.3632	0.4293	0.0482	0.417	0.042	0.6739	0.5082	0.0959	0.2002	0.282	-0.093	-0.0184	-0.0993	-0.3305	-0.4284	-0.3813	-0.757	0.6319	0.5046	0.1163	-0.0975	-0.4122	0.4224	0.3175	0.2049	0.288	0.673	-0.026	-0.3053	-0.1067
109337	-0.2511	0.4948	1.0085	0.0368	0.4128	-1.0784	-0.3806	-0.1861	-0.198	-0.7623	0.1812	-0.1252	0.3871	-0.1181	-0.165	-0.1556	0.0459	0.425	-0.1224	-0.4059	0.3994	-0.1459	-0.2833	-0.1586	0.0217	-1.5676	-0.2009	-0.4385	-0.4034	0.7993	-0.3238	0.0817	-0.0161	0.4994	0.6375	0.4714	-0.3671	-1.8297	-0.7333	0.0184	0.8745	-0.9234	-0.2762	-0.582	0.3379	-1.2989	-0.5623	0.5359	-1.1498
109347	0.0441	0.1973	-0.2742	-0.0844	-0.132	0.583	-0.0575	-0.0316	0.4093	0.5028	-0.0356	0.0787	-0.0287	0.0108	-0.1259	-0.0102	-0.0753	-0.0512	-0.2566	-0.373	-0.0424	-0.023	0.0725	0.1541	0.1584	0.2141	-0.2524	0.3627	0.0621	-0.1556	0.7598	-0.0974	0.0787	0.0458	-0.1728	0.0679	-0.0428	0.0124	-0.0508	-0.1151	-0.1673	0.4599	-0.0152	0.2007	0.1642	-0.3872	-0.3909	0.0104	0.3812
109356	-0.5359	-0.1521	-0.1419	-0.7451	0.2567	-0.5215	0.8117	-0.336	-0.3791	0.3658	-1.4932	-0.4118	-0.2639	0.0354	0.1784	-0.0922	-0.9068	-1.104	-0.3429	-0.8641	-0.4936	-1.4946	-0.8872	0.7862	0.3194	0.9908	0.2927	-1.1396	-0.6543	0.1573	0.1876	0.0119	0.7313	-0.0819	-0.4157	0.3492	-0.4543	-0.0573	-0.947	0.1276	0.3777	-0.1558	-0.1904	0.1998	0.5946	-0.0331	0.0454	-0.4507	0.29
109362	-0.0672	0.6039	-0.0667	0.2814	-0.1826	-0.2214	-0.1544	0.2501	-0.4244	-0.39	-0.2701	0.1326	-0.4634	-0.3785	-0.5273	0.1129	0.1124	-0.0541	-0.317	-0.1318	-0.1382	0.1479	-0.2157	0.2048	-0.3552	0.0419	0.0184	-0.0106	0.1618	-0.2188	-0.6034	-0.1028	-0.0189	0.458	0.3007	0.4003	-0.0433	0.1513	-0.0781	-0.1689	0.3732	0.2667	-0.1427	-0.4062	-0.2624	-0.1498	-0.4888	-0.2888	0.0337
109365	0.0948	-0.3211	0.2503	-0.3563	-0.3529	0.2665	-0.2741	0.2863	0.3011	0.0514	0.1729	-0.1337	0.0485	-0.0099	-0.5881	-0.2098	-0.0347	-0.0836	-0.3498	-0.3577	-0.3131	0.3622	0.0543	0.141	-0.2464	0.2127	-0.1328	0.2613	0.5732	-0.0682	0.8023	-0.1045	0.061	-0.085	-0.3937	0.1366	-0.0298	0.4163	-0.3973	-0.0058	-0.0446	0.0496	-0.1318	0.3672	0.3906	0.0771	-0.0954	-0.2499	0.7923
109372	-0.2571	0.2095	0.4401	0.3514	-0.1308	-0.3423	-0.1382	-0.6137	-0.3437	-0.7201	0.3142	-0.5652	0.3124	0.192	-0.1003	0.2048	-0.4321	-0.1455	-0.7633	-0.3885	0.0937	-0.1278	0.2831	-0.0147	0.162	-0.2111	-0.1608	-0.504	-0.753	0.4515	0.174	0.4543	0.259	0.1187	0.6099	0.2334	-0.1932	-0.2058	-0.2488	0.9199	0.3227	-0.6507	0.1643	-0.1302	0.0597	0.6897	-0.0686	-0.3909	-0.6415
109378	-0.2571	0.5411	0.4182	0.2105	-0.107	-0.54	-0.3958	-0.4541	-0.0476	-0.638	-0.0034	-0.034	0.1029	-0.1233	-0.0984	0.1346	0.2533	-0.1477	-0.1701	-0.1857	0.1241	-0.0664	-0.06	-0.2493	-0.1307	-0.5234	-0.0087	-0.1515	-0.2465	0.7163	-0.1958	0.0264	0.1942	0.2233	0.2977	0.463	-0.2364	-0.6913	-0.5743	-0.0691	0.4471	-0.6559	-0.2649	-0.3601	-0.25	-0.9272	-0.1761	0.4244	-0.2725
109385	-0.4192	0.4079	0.2729	-0.1801	0.165	0.505	-0.2991	-0.2136	0.3967	-0.0245	-0.3923	-0.0644	-0.3398	-0.0415	0.3606	-0.4041	-0.1508	-0.4478	-0.3351	-0.6172	-0.1768	0.3533	0.001	-0.1689	0.0347	0.2166	-0.1467	0.4892	0.2254	0.1886	0.2484	-0.009	0.4035	0.3713	-0.3426	1.0173	-0.8099	0.2897	0.0413	0.1668	-0.2229	0.3712	-0.0135	0.0952	-0.1285	0.6456	-0.3545	0.0437	0.5739
109390	-0.4473	-0.1003	-0.0648	-0.1402	-0.2611	0.3112	-0.0294	-0.2907	-0.3037	-0.3387	0.2878	0.0132	-0.084	0.1388	-0.1401	-0.207	-0.3982	0.2028	-0.1035	-0.367	-0.0492	0.1925	0.3466	0.4512	0.0589	0.3718	0.1194	0.1343	-0.1764	-0.0617	0.4245	0.1658	0.0728	0.3439	-0.1106	0.2014	-0.2392	0.2852	-0.2793	-0.0299	-0.0543	0.057	0.0625	0.451	0.1121	0.4714	0.215	-0.064	0.2344
109394	0.2016	-0.6413	-0.1192	-0.081	0.0822	0.2325	0.3783	-0.0147	-0.0798	0.262	-0.6836	-0.097	-0.3933	0.3153	0.3926	-0.1522	0.3348	0.0628	0.2477	0.0684	0.2546	0.0492	0.3039	0.1543	0.2083	0.5193	-0.0665	-0.4464	0.1216	0.0831	0.1923	0.0239	-0.2922	-0.0498	-0.7543	-0.3241	0.2692	0.2362	0.1899	0.0354	-0.1642	0.3398	0.1572	0.2392	0.2806	0.8079	-0.1748	-0.2808	0.078
109395	0.0934	0.106	-0.1179	0.0614	-0.381	0.2355	0.2551	0.2537	0.1546	0.2584	-0.1435	0.117	-0.1133	-0.0245	0.5182	-0.1552	0.3275	-0.2234	0.009	-0.0968	-0.0846	0.1801	0.0221	0.0749	-0.0854	0.1982	-0.2194	0.4978	0.7165	-0.1132	0.179	-0.0936	0.1261	0.0047	-0.1896	0.1995	0.116	0.6057	0.4409	-0.0428	-0.4196	0.4355	-0.238	0.2472	0.2214	0.4269	0.0598	0.0459	0.4545
109417	-0.2005	0.8825	0.1093	-0.156	-0.2144	-0.0748	-0.2973	-0.0035	0.5923	0.228	-0.3047	0.1915	-0.1412	-0.7197	-0.261	0.045	0.1779	0.2536	0.016	0.1284	-0.4291	-0.1104	-0.48	-0.0716	-0.539	-0.3259	-0.419	0.0798	0.5596	-0.0705	-0.2118	-0.5482	0.1181	-0.2763	0.2626	0.3312	0.4297	-0.2129	0.2645	-0.6921	0.3089	0.1014	-0.4181	-0.1666	0.0607	-0.7381	-0.6234	0.0843	0.0618
109437	0.173	0.1552	0.1691	-0.4878	-0.2094	0.3199	-0.2975	-0.6636	-0.0368	-0.3585	-0.1829	-0.0187	-0.3824	0.3234	-0.0058	-0.0924	-0.4733	-0.094	-0.5501	-0.3277	-0.0277	0.1352	-0.0783	0.4585	0.2734	0.2605	-0.1055	0.0744	0.1371	0.2635	0.5156	0.1425	0.4179	0.1887	-0.3719	0.1171	-0.578	0.3951	-0.5883	0.0276	0.1111	-0.0242	0.2027	0.039	0.1702	0.4155	-0.1624	-0.2749	0.0829
109438	0.2003	-0.0821	-0.2581	0.1843	0.331	0.4484	0.6033	0.5233	-0.1863	0.4043	0.3178	0.3301	0.2335	-0.0429	0.5145	-0.1845	-0.074	-0.1028	0.767	-0.7937	0.1866	0.3236	0.2723	-0.0862	0.0427	0.7413	0.1446	0.226	-1.0838	0.2752	-0.1793	-0.0245	-0.0764	-0.0679	-0.0767	-0.4132	0.5051	-0.1289	0.2847	-0.0684	-0.4421	0.2932	0.1507	0.741	0.1635	0.6548	0.6135	0.122	0.0158
109444	0.0868	0.3006	-0.1406	0.0221	0.0416	0.1447	0.0301	-0.1984	-0.0619	-0.0705	0.0517	-0.0167	0.0855	0.142	0.3857	-0.1285	0.1933	-0.3749	-0.2701	-0.0222	0.0515	0.2276	-0.0261	0.2107	-0.1656	0.1129	0.1735	0.2044	0.6633	0.4569	0.0908	0.282	-0.0031	0.073	-0.0244	0.304	-0.2992	0.6112	0.0069	-0.0739	-0.0412	0.1036	-0.0012	0.3267	0.0884	0.3213	0.1181	0.0615	0.4352
109450	-0.107	0.0102	-0.186	-0.0085	-0.2872	0.1629	0.1477	-0.0236	0.0051	-0.0556	-0.0233	0.2434	-0.0959	0.1321	0.269	0.0951	0.3904	-0.3365	0.1843	0.3118	-0.0847	0.0942	0.1002	0.2581	0.076	0.0564	0.1704	0.2308	0.758	-0.0297	0.0548	0.0321	0.3415	0.1089	0.0117	0.2629	-0.0104	0.6808	0.3978	0.0455	-0.0796	0.4245	-0.077	0.0024	-0.0393	0.447	0.2517	0.0397	0.4191
109451	-0.0271	0.8837	0.643	0.1818	0.3152	-0.7176	-0.0727	-0.3085	0.2293	-1.0412	0.4139	0.4416	-0.1281	-0.0999	-0.2372	0.5872	-0.3307	0.1093	-0.3918	-0.0723	0.3193	0.0789	-0.2817	-0.518	-0.1169	-0.9756	0.1285	-0.3633	-0.6286	0.6893	-0.701	-0.1425	0.0377	0.6578	0.3687	0.5825	-0.413	-0.9914	-0.6774	-0.0014	0.6194	-0.761	0.169	-0.3386	0.5257	-0.326	-0.3812	0.191	-0.3384
109524	-0.0662	0.0166	-0.1346	0.1343	0.0554	0.2255	0.0925	-0.5987	0.1434	-0.2143	0.3431	0.0215	0.0376	0.0578	0.0378	-0.1195	-0.096	-0.2479	0.0981	0.0424	0.0407	0.2957	0.0961	-0.0588	0.212	0.0325	0.2847	0.3376	0.0241	0.3326	-0.3805	0.384	0.2493	0.2052	0.0233	-0.0036	-0.1706	0.7506	0.1508	0.2869	-0.183	0.0524	-0.0753	0.2252	-0.125	0.3784	0.2456	0.183	0.4227
109525	-0.0244	-0.2187	-0.162	0.0483	-0.2301	0.2366	-0.1914	-0.1171	0.0643	-0.2341	-0.039	0.1137	-0.1655	-0.0036	-0.112	-0.3218	-0.2354	0.0499	-0.1939	-0.3663	-0.0485	0.0406	-0.1686	0.1208	-0.2173	-0.0852	0.0799	0.1749	0.4189	0.0323	0.069	0.1318	0.0865	0.1592	-0.0457	0.3484	-0.0053	0.511	0.0595	0.073	-0.2086	0.3422	0.0198	0.2908	-0.0225	0.18	0.0276	-0.046	0.4942
109532	0.5345	-0.465	0.3427	-0.4026	-0.0791	-0.0035	0.1471	0.314	0.3513	-0.1637	-0.283	-0.2812	-0.0091	-0.1763	0.1397	-0.0531	-0.2755	0.0495	-0.1153	-0.1185	0.1442	-0.0514	0.5052	0.2027	0.8243	0.5669	-0.4991	-0.3757	-0.3979	-0.0909	-0.0732	-0.0169	-0.4319	-0.3179	-0.7996	-0.7406	-0.1712	-0.0453	-0.6119	-0.1703	0.2356	-0.4096	0.5472	0.1247	0.6166	0.7654	0.2014	-0.3478	-0.0695
109539	0.1438	-0.3588	0.1827	-0.1522	0.0024	0.0506	-0.1302	-0.2818	-0.0654	-0.4076	0.081	0.0953	-0.1533	-0.0159	-0.1949	-0.1807	-0.1366	-0.0528	-0.2338	0.0047	-0.0666	0.138	0.1688	0.3953	0.0385	0.3151	0.0696	0.2865	0.7428	-0.118	0.2393	0.4765	0.257	0.1825	-0.0857	0.2307	-0.1871	0.5444	0.0588	-0.0425	-0.0069	0.1196	0.1232	0.2736	-0.0238	0.4459	0.3141	-0.1582	0.1552
109542	0.419	-0.2997	0.4981	-0.2769	-0.369	0.0715	0.1788	-0.108	-0.1736	0.1251	-0.0865	-0.0577	-0.0234	0.3017	0.1002	-0.2113	0.2803	-0.5886	0.1817	-0.2911	-0.0439	0.6255	0.1622	0.0976	-0.1444	0.2701	0.2997	0.1385	0.4794	0.032	-0.0888	-0.0262	-0.1987	0.1572	-0.242	0.0448	-0.141	0.5597	-0.3327	0.3674	-0.1842	0.1363	-0.1662	0.7167	0.3479	-0.0939	0.0113	-0.2214	0.6298
109551	-0.4978	-0.6719	-0.6192	0.1845	-0.3001	0.2479	0.0793	0.1279	-0.0442	0.594	0.0684	-0.1064	-0.2183	-0.1262	0.4903	-0.4501	0.1898	-0.1773	0.4618	0.0143	-0.3904	-0.2282	-0.3797	-0.1787	-0.2488	-0.0038	-0.1786	0.2459	0.1605	-0.1099	-0.4261	-0.1745	0.1686	-0.404	0.2546	-0.0277	0.4498	0.1598	0.4036	-0.4075	-0.4729	0.3536	-0.2453	0.0181	-0.6562	-0.236	0.022	-0.3436	0.5888
109557	-0.1689	0.393	0.3528	0.3488	0.3922	-1.1232	-0.3268	0.1977	0.0822	-0.0927	0.2633	0.1243	0.3908	0.165	-0.1182	0.4561	0.0798	0.8283	-0.0346	0.1085	0.0345	-0.1815	-0.0865	-0.3978	-0.3132	-0.7318	-0.3555	-0.2525	-0.0507	0.2076	-0.3093	-0.2567	-0.2937	-0.1855	0.2047	0.2317	0.1281	-0.6851	-0.3605	0.089	0.5219	-0.8528	0.0929	-0.8261	0.0947	-0.9833	-0.4179	0.4926	-0.666
109566	-0.206	-0.6035	0.4932	0.2332	-0.151	-0.1179	-0.4432	0.126	0.0672	-0.0045	0.1409	-0.1011	-0.2447	0.104	0.0909	0.0112	0.4037	-0.2795	0.2007	-0.4828	-0.0694	0.0808	-0.3491	0.2021	-0.0337	-0.0692	0.3681	-0.0552	-0.028	0.2955	0.3402	0.3925	0.5443	0.044	0.264	0.1037	0.3098	0.4327	0.166	-0.1993	-0.1869	0.0461	-0.1375	-0.0635	-0.1394	0.337	0.4081	0.2352	0.2987
109596	-0.3587	0.1468	-0.9584	0.4833	-0.4297	-0.0625	0.3282	0.4405	-0.8633	-0.077	-0.0366	0.9571	-1.0974	-0.3093	0.8341	-0.3269	-0.1769	-0.3644	0.8264	-0.5194	-0.3409	-0.4946	0.3257	-0.3718	-0.2733	0.6212	0.2894	1.0279	0.2329	0.7992	-1.7493	-0.3286	0.5441	-0.1423	0.0305	-0.6168	0.4806	0.3859	0.8453	-0.9757	-0.4807	0.3617	-0.2935	1.0276	-0.1408	0.736	-0.064	-1.391	0.2368
109622	-0.3657	-0.7969	-0.6785	0.5701	-0.1105	0.065	0.1147	-0.7354	0.1917	0.2967	0.3761	0.5962	0.1391	-0.3243	-0.1041	0.0127	0.4196	0.282	0.2281	-0.1939	-0.1044	0.3682	-0.0946	0.148	0.0752	0.3115	0.1795	0.3004	0.4557	0.2704	-0.4442	-0.1546	0.4476	0.26	0.0216	0.033	-0.1481	0.4909	0.177	-0.471	-0.4009	0.34	0.0541	0.1711	-0.5641	0.1321	0.2278	0.2455	0.322
109626	0.1603	-0.1398	-0.5045	0.1405	0.2077	0.2537	0.0728	-0.3668	-0.1232	-0.5106	0.18	0.1584	-0.4305	0.0412	-0.2763	-0.2852	0.3561	0.2478	0.0601	0.0343	0.2958	0.2526	0.0897	0.0951	-0.0775	0.2312	0.1514	-0.0749	-0.3465	-0.2554	0.0358	0.0365	0.3282	0.0491	0.0603	-0.0587	0.2768	0.4986	0.2398	0.0611	-0.0748	0.2569	-0.4128	0.2084	0.1814	0.427	0.47	-0.2008	0.2208
109627	-0.0726	-0.0616	0.3623	0.202	0.041	-0.5965	-0.3223	-0.5986	-0.0201	-0.7428	0.2553	-0.0283	-0.0519	-0.0736	-0.0365	0.0706	0.276	-0.0943	-0.0775	0.506	0.315	0.174	0.0768	0.0871	0.055	-0.3401	0.2954	-0.5518	0.0395	0.5697	-0.1808	0.0718	0.0135	0.1936	0.2329	-0.078	-0.0888	-0.2858	-0.5446	0.0776	0.313	-0.4524	-0.1169	-0.2875	-0.1728	-0.299	0.0137	0.3981	-0.3178
109628	-0.5305	-0.2302	-0.2979	0.0859	-0.3712	0.7479	-0.1206	0.0774	0.0877	0.0018	0.2188	0.3498	-0.0448	-0.2981	-0.459	-0.4852	0.1186	-0.2589	0.178	-0.1537	-0.2941	-0.0356	-0.1193	0.0181	-0.4264	0.1482	0.0119	0.4604	0.5605	0.0355	0.0754	0.1989	0.3905	-0.1039	0.2097	0.0355	0.0452	0.5063	0.1826	0.0399	-0.438	0.4281	-0.211	0.2052	0.0402	0.1502	-0.08	-0.1667	0.6458
109636	0.5211	-0.0674	-0.3073	-0.2111	0.3167	0.2274	0.8544	0.7721	0.3834	0.961	-0.1067	0.1117	-0.1881	-0.1061	0.7668	0.3246	0.3608	0.3506	0.5405	0.3121	0.4956	0.2863	0.1169	-0.217	0.5242	0.3239	0.2884	0.5647	0.3989	-0.1876	-0.0727	0.1955	-0.1114	-0.3694	-0.3232	-0.269	0.5559	0.5716	0.8511	0.2086	-0.1388	0.8809	0.0186	0.3758	0.0858	0.9741	0.0987	0.1734	0.0838
109660	0.0247	-0.0942	0.0876	-0.2236	0.038	0.2959	0.0311	-0.1714	-0.0875	0.1223	0.1806	0.0923	0.1491	0.1189	-0.3216	-0.097	-0.5041	0.0704	0.1265	0.1279	-0.1623	0.092	0.105	0.2155	0.0812	0.3085	0.13	0.1749	-0.528	0.0023	0.2702	0.277	-0.0118	0.2235	-0.0525	0.0497	-0.1896	0.3016	-0.1393	0.1108	-0.1989	0.1279	0.0663	0.2055	0.2683	0.2388	0.0553	-0.0255	0.0711
109673	-0.2432	-0.388	-0.2589	-0.0178	-0.1371	0.3857	-0.2087	-0.1708	0.1033	0.3046	0.2723	0.1527	0.0234	-0.0714	-0.3506	-0.2993	0.3614	-0.1359	-0.0117	0.103	-0.322	-0.0241	0.054	0.0503	-0.0579	0.0536	0.1744	0.3368	0.3961	-0.307	0.3081	0.2842	0.2964	0.11	-0.1126	0.2519	0.0671	0.2765	0.1391	-0.0475	-0.319	0.3052	-0.1385	0.2064	-0.155	0.2406	0.0221	-0.2091	0.5436
109706	0.3106	-0.3779	-0.0476	-0.5899	0.674	0.113	0.5888	0.5629	0.0916	0.0798	0.1608	0.0353	0.0821	0.1169	0.4347	0.2655	-1.0176	0.2909	0.677	0.049	0.0627	0.2504	0.1785	0.1425	0.3502	0.0177	0.2774	-0.0157	-0.0888	-0.0926	0.1925	0.4139	0.0358	-0.1177	-0.3392	0.1947	0.1807	0.2792	-0.0903	0.1406	-0.3196	0.0223	-0.0602	0.1808	0.0771	0.5322	0.0681	0.2763	0.0622
109708	-0.2857	-0.4606	-0.4317	0.1873	0.0406	0.3593	0.0003	0.2024	-0.2076	0.7112	-0.2698	0.2029	-0.2939	-0.0313	0.398	-0.0348	0.4439	-0.0691	0.6164	0.2996	-0.3607	-0.0342	-0.1065	-0.1881	-0.1851	0.3368	-0.267	0.4169	0.7567	-0.1106	-0.5798	-0.1581	-0.0504	-0.5062	0.2295	-0.2653	0.4566	1.013	0.794	-0.6742	-0.3593	0.6909	-0.1873	0.6209	-0.4235	0.5564	-0.1822	-0.0467	0.5556
109712	-0.3443	0.7681	0.8073	0.0385	-0.2124	-0.4785	-0.2788	-0.4128	-0.4325	-0.7647	0.1056	-0.5463	0.1019	0.0163	-0.028	0.2019	-0.1222	0.0442	-0.3635	-0.2487	0.2266	-0.0063	-0.1922	-0.0998	0.0467	-1.1729	0.0185	-0.5523	0.6475	0.6184	0.3403	0.337	-0.22	0.1008	0.2787	0.1447	-0.1784	-0.2716	-0.5851	0.2521	0.72	-0.7406	-0.0812	-0.6472	-0.1994	-0.9531	-0.5668	0.4279	-0.6932
109729	1.2296	-0.3719	0.0062	0.017	0.2129	-0.0108	-0.037	0.3538	0.6788	0.2875	-0.2791	0.1921	-0.1349	0.45	0.2445	-0.0706	-0.585	0.0342	-0.8126	0.4206	-0.2549	-0.3257	0.1245	0.4653	0.3084	0.6655	-0.378	0.3727	-0.1059	-0.642	-0.1012	-0.4064	-0.3717	0.3627	-0.8594	-0.2645	0.3431	-0.3193	-0.5892	-0.1303	0.0866	0.0253	0.4128	-0.1798	0.3905	0.1581	-0.1779	-0.3285	-0.1222
109744	0.5309	-0.0224	-0.0235	-0.1686	0.1402	0.0853	0.0768	-0.0462	0.2458	0.0786	0.0272	0.1166	-0.1229	0.0318	-0.0381	0.0789	-0.3466	-0.5852	-0.2603	-0.3341	-0.2904	0.2745	0.1628	0.0552	-0.0569	0.4106	-0.0413	0.0092	0.2426	-0.0503	0.4038	-0.0736	0.0593	-0.0775	-0.3128	-0.0057	0.0623	0.3998	-0.0505	0.1396	-0.2028	0.0663	-0.0092	0.2551	0.2491	0.3438	-0.0741	-0.1376	0.3252
109757	0.2251	-0.0343	-0.7935	-0.0528	-0.074	0.3409	-0.2277	0.8698	0.5908	1.0995	-0.3917	0.1528	-0.0446	-0.2396	0.151	0.0363	0.1413	-0.0009	0.1778	0.6342	-0.3977	-0.4496	-0.0525	-0.0058	-0.0886	0.1493	-0.6884	0.0861	0.2708	-0.8558	0.4037	-0.5212	0.1554	-0.2843	-0.0467	-0.0176	0.6126	-0.1302	0.6921	-0.326	-0.1679	0.7967	-0.1538	-0.1091	-0.363	-0.2022	-0.1626	-0.2184	0.2036
109758	0.0687	0.2802	-0.5644	0.2937	0.313	0.423	-0.5784	0.1838	-0.4079	0.4422	-0.1877	0.3692	-0.4073	-0.3781	0.3418	0.2908	0.7927	-0.1729	-0.3609	0.3233	0.0247	-0.2278	-0.1758	0.085	-0.0822	0.0498	-0.2091	0.4834	-0.0055	-0.0813	0.2372	-0.6816	0.0094	-0.0207	-0.5823	0.624	-0.1258	0.4926	-0.0349	-0.173	0.0335	0.209	-0.31	0.1373	-0.0418	0.5237	-0.2571	0.2113	0.1539
109765	-0.0593	-0.5046	-0.1512	0.0599	0.0275	0.1676	-0.1277	-0.5107	-0.0211	-0.1322	0.3062	0.483	-0.2648	-0.0537	0.0242	-0.0805	-0.35	-0.1209	-0.0777	-0.1415	-0.1313	0.0987	-0.0494	0.2648	-0.0792	0.0976	0.0925	-0.2837	0.3715	0.2108	0.0152	0.2682	0.3446	0.2168	0.0468	0.2963	-0.156	0.1687	-0.2737	-0.1619	-0.2717	0.1696	0.0524	0.0751	0.2468	0.3084	-0.1295	-0.1037	0.4353
109767	0.0685	0.0606	0.0273	-0.357	0.4172	0.3109	-1.0311	-0.2121	-0.0368	-0.4222	0.6485	0.299	-0.4024	0.5272	-0.1045	-0.136	-0.4952	0.5741	-0.0918	-0.2401	0.3888	0.2464	0.7492	0.4825	0.2873	-0.5135	-0.6417	0.1434	0.0606	0.3873	-0.2325	-0.0759	0.7384	-0.9773	-0.5365	0.9911	0.1143	-0.4632	0.6711	0.2567	0.0112	-0.6209	-0.3223	0.3277	0.6185	-0.658	0.5001	0.272	-0.4541
109770	-0.1661	0.2634	-0.3229	0.4922	0.183	0.3977	0.1595	0.1303	0.2029	0.3443	-0.1111	0.1808	0.0304	0.0549	-0.3903	-0.2394	0.0454	-0.7039	0.0701	-0.0052	-0.2764	0.1078	-0.0165	-0.0096	-0.324	0.2004	-0.0215	0.1222	0.6929	0.0886	0.2413	0.0725	0.2051	0.2077	-0.2914	-0.043	-0.1294	0.8199	0.5784	0.4267	-0.3567	0.3476	-0.198	0.1227	-0.4992	0.2759	0.1534	-0.2645	0.7446
109788	-0.0074	0.0771	-0.5981	0.1097	0.0912	0.3518	0.4719	0.2351	0.0758	0.3403	0.1572	0.321	-0.1312	-0.0126	0.4789	-0.026	0.1339	-0.0679	0.4323	0.0819	-0.1374	-0.0146	-0.1162	-0.0874	0.1012	0.4618	-0.036	0.4854	0.3447	-0.3619	-0.6196	-0.2591	-0.0367	0.1592	-0.0993	-0.3719	0.1707	0.712	0.5263	-0.2099	-0.5339	0.6212	0.0356	0.3073	-0.1249	0.3757	0.2291	0.4055	0.176
109792	-0.5994	0.1462	0.0182	0.2456	0.0404	-0.0381	0.146	-0.5826	0.2498	-0.4228	0.2416	0.2266	0.2418	-0.0369	-0.3092	-0.1626	-0.3277	-0.1272	-0.0459	-0.6457	-0.0521	0.1807	0.1196	0.0462	-0.2467	0.2261	0.3268	0.2663	-0.5048	-0.0443	0.0836	0.3616	0.1984	0.1575	0.187	0.2222	-0.3859	0.1256	0.4929	0.3281	-0.1622	0.0719	-0.0832	0.0785	0.3673	0.4725	0.2704	-0.0611	-0.0345
109808	0.4898	-0.0295	0.4123	-0.6377	-0.3788	0.8686	0.4041	0.4054	0.4661	0.1183	-0.1443	0.4758	0.9733	0.2061	0.0927	-0.203	0.2393	0.2276	0.1937	-0.0352	-0.1199	0.3328	0.6339	0.5466	0.2064	0.9636	-0.1778	0.4449	1.0975	0.552	1.3154	-0.2118	0.2576	0.3362	-0.1933	-0.415	-0.3346	0.7173	0.2842	0.5558	-0.5271	0.3143	0.3207	0.1051	0.4449	-0.1252	0.2499	0.0397	0.1937
109811	0.0546	-1.1133	0.2037	-0.1437	0.0716	0.0413	-0.1053	-0.2452	-0.2914	-0.3683	0.219	0.0614	-0.1912	0.1502	0.0084	-0.0732	-0.4569	-0.2279	0.0022	-0.2459	0.1305	0.1667	0.0637	0.4061	0.1978	0.8086	-0.0213	-0.167	-0.3918	0.2087	0.1945	0.1966	-0.0549	0.0079	-0.365	0.128	-0.2493	0.2735	-0.4443	-0.1609	0.3463	0.1658	0.1761	0.33	0.1249	0.4989	0.1547	-0.1458	0.2375
109821	0.4028	0.2353	0.6607	0.0798	0.1153	-0.7535	0.2312	-0.4709	-0.8631	-0.5413	0.0661	-0.6417	0.632	0.5024	0.3644	0.3704	0.213	-0.1338	-0.4596	-0.4043	0.5079	0.3218	0.4241	0.3602	0.6536	-0.0756	0.2813	-0.6403	-0.4677	0.7369	0.7166	0.535	-0.0313	0.0892	-0.0448	-0.1281	-0.8378	-0.313	-0.4903	0.5036	0.291	-0.3016	0.3382	0.154	0.1098	0.3233	0.4653	0.1502	-0.741
109825	-0.0758	1.0983	0.8868	0.1361	-0.4275	-0.4671	-0.632	-0.21	0.2358	-0.8601	0.0615	0.2992	-0.0047	-0.5027	-0.4839	0.1811	0.3544	0.2617	-0.5443	-0.0362	0.215	-0.1674	-0.2206	-0.0936	-0.0566	-1.5786	0.0104	-0.5247	0.2204	0.6252	-0.4422	0.2521	0.2207	0.2972	0.1199	0.4423	0.041	-1.316	-0.9602	0.0047	0.7237	-0.9343	-0.5105	-0.5743	-0.235	-0.5959	-0.6733	0.3309	-0.2522
109833	0.7692	-0.0363	-0.2623	-0.0382	0.3252	0.3825	0.6543	0.5859	-0.1853	0.1109	-0.0484	-0.1005	0.2266	0.2698	0.6603	0.2505	0.1636	-0.0162	0.2048	-0.0803	0.4431	0.3587	0.3145	0.1146	0.5997	0.3699	0.2045	0.0726	0.7733	-0.1216	-0.2948	0.0603	-0.2076	-0.0446	-0.3135	0.003	0.2439	0.3972	0.3021	0.0297	-0.3709	0.1829	-0.0268	0.327	0.6679	0.8124	0.0871	0.138	0.1555
109839	0.0628	-0.0272	-0.3784	-0.0577	-0.1034	-0.5533	0.1522	0.4721	-0.187	0.2012	-0.1602	0.1526	-0.5695	-0.1191	0.7517	0.0826	-0.1539	0.2594	0.3772	-0.1384	0.0958	-0.2168	0.1621	-0.2855	-0.007	0.0408	0.0023	-0.2214	0.1227	0.0964	0.0456	0.1365	0.1542	0.037	-0.0404	0.0496	0.1827	0.1968	0.2617	-0.1951	-0.2825	0.1245	-0.1253	0.2553	0.2643	0.2003	0.2236	0.3099	0.0215
109841	0.8848	0.0975	0.0754	-0.3525	0.2799	0.7882	0.6867	0.7256	-0.0831	0.2045	-0.1554	-0.1597	0.0822	0.1302	0.4422	0.3512	-0.0665	0.1992	0.2711	0.1417	0.4823	0.3619	0.6373	0.1979	0.891	0.4779	0.5174	-0.2282	0.2445	-0.1072	0.2421	0.1332	-0.0466	-0.2972	-0.5929	-0.4864	0.2182	0.492	-0.0602	0.2377	-0.1553	0.1082	0.1915	0.4047	0.7672	0.8863	0.1051	-0.0398	-0.1847
109856	0.4188	-0.0454	-0.2078	0.1577	0.2171	-0.0306	0.1409	0.1711	0.0234	-0.044	-0.0732	0.1487	0.1608	0.133	0.5146	0.2368	0.0246	-0.2294	0.3827	0.2271	-0.0921	0.3737	0.4166	0.405	0.1263	0.5166	0.2624	-0.0553	0.3497	-0.544	0.1295	0.0353	0.0659	0.0085	-0.0951	0.0007	0.1922	0.4363	0.4396	0.2484	-0.3374	0.4018	-0.0647	-0.0638	-0.1338	0.3401	0.4111	0.1997	0.1728
109858	1.1087	-0.4493	0.0762	-0.1489	0.5028	-0.1312	-0.0328	-0.3667	-0.0367	0.1891	-0.7068	-0.2468	-0.3211	0.7105	0.2364	0.4347	-0.347	0.0334	-0.2858	-0.3058	-0.6615	0.1478	0.3025	0.1227	0.3872	0.9805	0.0719	0.3868	0.2016	-0.7168	-0.0786	-0.4976	-0.8184	-0.2383	-0.4617	0.1523	0.2157	0.1351	-0.5609	0.1593	0.4061	0.1122	0.9878	0.7205	0.5159	0.6987	-0.195	-0.1122	0.252
109862	0.0546	0.3054	-0.2191	0.1642	-0.0942	0.469	0.1712	0.4261	0.7552	0.4395	-0.0634	0.1959	0.1255	-0.065	0.1474	-0.1907	-0.2075	0.1227	0.5489	0.088	-0.0215	-0.3803	-0.1481	-0.1138	-0.1838	0.2232	-0.2817	0.2786	0.3243	-0.29	0.0113	-0.1485	-0.4053	-0.0887	-0.1961	-0.1174	0.5639	0.465	0.1544	-0.0987	-0.4337	0.2453	0.2011	0.2897	-0.0253	0.1886	-0.0486	-0.1735	0.288
109879	0.6732	-0.0399	-0.0233	-0.2384	-0.1619	0.3285	0.2101	0.216	0.3168	0.7933	-0.7654	-0.1158	-0.2019	-0.2948	0.0786	0.0712	0.2947	-0.2417	0.1092	0.2237	0.166	-0.2035	0.0881	0.2146	0.2609	0.2546	-0.3531	-0.0609	0.7463	-0.5713	0.3466	-0.4743	-0.1014	-0.3546	-0.1392	-0.3893	0.3533	0.1849	0.3625	-0.1887	-0.1763	0.6368	-0.1521	-0.2642	-0.0456	0.0242	-0.1628	-0.2532	0.4016
109887	-0.3301	-0.0643	-0.1319	-0.1648	-0.2017	0.307	0.0214	-0.1906	0.0394	-0.1075	0.4168	0.3219	-0.0539	-0.0674	-0.0687	-0.1321	-0.1287	-0.158	0.1314	0.0303	-0.0521	0.225	0.0024	0.1107	-0.2814	0.2245	0.2523	0.4027	0.5921	0.2416	0.1861	0.3594	0.1472	0.2594	0.0567	0.1965	-0.084	0.5884	0.1447	0.1458	-0.2017	0.3613	-0.1072	0.4084	-0.0326	0.2335	0.0954	-0.0109	0.3973
109943	-0.039	0.2316	-0.2423	-0.1153	-0.0944	0.0639	-0.0183	-0.4677	-0.0582	-0.1873	-0.0167	0.0922	-0.1462	0.1238	0.2754	-0.018	-0.379	-0.1601	-0.1043	-0.6528	0.1059	0.2327	-0.1079	-0.0073	0.0048	0.1332	0.0449	0.0014	0.3255	0.3576	-0.0225	0.1632	-0.1401	0.1678	-0.3676	0.1578	-0.1254	0.3228	-0.1906	-0.0661	-0.347	0.0094	-0.0653	0.3611	0.492	0.1629	-0.0892	-0.0147	0.4666
109946	0.5066	-0.2795	-0.3132	-0.0469	-0.0757	0.1422	0.3071	0.2786	0.2675	0.7312	0.035	-0.0069	0.1869	-0.0403	-0.0639	-0.0501	-0.2717	0.2019	-0.1357	0.1037	0.1836	0.0253	0.2889	0.0119	0.4491	0.5871	-0.1805	0.2564	-0.0059	-0.4656	0.4297	-0.3009	-0.0251	-0.0516	-0.2054	-0.2877	0.1281	-0.1595	0.1643	0.0352	-0.1042	-0.0219	0.0437	0.1674	0.3371	0.1611	0.0799	-0.0017	0.0534
109967	-0.2413	0.4038	0.499	0.0853	0.3705	-0.679	-0.2822	-0.2261	-0.2837	-0.7214	0.2392	-0.1159	0.3391	-0.0812	-0.2666	0.2203	-0.2612	0.4888	-0.3487	-0.3282	0.2968	-0.2434	-0.0872	-0.1908	-0.1085	-1.1542	-0.1027	-0.7102	-0.6856	0.4947	-0.2391	-0.0087	-0.1023	0.3588	0.403	0.3074	-0.3327	-1.2857	-0.6856	0.0884	0.4626	-0.971	-0.1938	-0.5033	0.5529	-0.8344	-0.5037	0.2731	-0.8975
109974	0.1544	0.3271	0.5311	0.3968	0.5463	-0.4042	-0.2386	-0.1329	-0.3596	-0.2774	0.0421	0.1834	0.2623	-0.2044	0.3956	0.1228	-0.0201	-0.2394	-0.0373	0.0173	0.2794	-0.0004	0.0583	-0.141	0.1573	-0.6021	0.5576	-0.1821	0.0295	0.3488	-0.1815	-0.2297	0.1861	0.1345	-0.0814	0.1548	-0.0323	-0.6659	-0.4863	-0.0316	0.5646	-0.4408	-0.1688	-0.0263	-0.0352	-0.0313	-0.1073	0.2649	-0.1541
109978	-0.0942	-0.1702	0.3117	0.0551	-0.0338	-0.3887	-0.3293	-0.7721	-0.3972	-0.6458	0.1	-0.3406	0.0312	0.1904	-0.0659	0.0381	0.1004	-0.3459	-0.4559	-0.3285	0.0163	-0.0517	-0.0611	0.2515	0.1701	0.0926	0.1012	-0.6576	-0.4726	0.4711	0.4326	0.0349	0.0054	0.3537	0.1892	0.2543	-0.3702	-0.3653	0.0325	0.0342	0.5954	-0.3546	-0.1431	0.0867	-0.0843	-0.311	0.2239	-0.1374	-0.2789
109981	0.3124	0.1326	-0.6509	0.28	0.0704	0.914	0.0553	0.7049	0.91	0.8661	0.0128	-0.1043	0.0541	-0.0488	-0.2732	0.1607	-0.0416	0.3009	0.3352	0.4098	-0.3618	0.2546	-0.2744	-0.1248	-0.4025	0.3552	0.2005	0.6517	0.621	0.1786	0.3233	0.1204	0.525	-0.1849	-0.3722	-0.2596	0.5394	1.1929	0.7737	0.1494	-0.2059	0.5379	-0.0138	0.2885	-0.51	0.4727	0.1514	-0.1753	0.5126
109998	0.3295	-0.1236	-0.7106	0.2342	0.2781	0.155	0.4345	0.7471	0.3858	0.5192	-0.0923	-0.2412	0.023	-0.0883	0.4187	0.0943	0.5978	-0.0532	0.5529	0.5559	-0.0575	0.0088	-0.2297	0.0789	0.0452	0.3967	-0.043	0.295	1.185	-0.2691	-0.439	-0.0623	0.2006	-0.1791	-0.1419	-0.2348	0.4896	0.6848	0.6018	-0.18	-0.3223	0.7667	0.1283	0.0049	-0.3265	0.4071	0.4042	0.2917	0.5033
110009	0.8791	-0.4091	0.1801	-0.0726	0.1345	0.5031	0.691	0.594	-0.2966	0.3761	0.1541	-0.1034	0.2475	0.0461	0.4542	0.3865	0.0328	0.2946	0.2747	-0.1723	0.6619	0.3039	0.618	0.3279	0.5961	0.2846	0.5473	-0.1596	0.3636	-0.0967	0.2774	-0.0212	-0.2763	-0.5684	-0.4627	-0.4807	0.1443	0.627	-0.1789	0.6222	-0.1553	0.2735	0.3579	0.2445	0.7866	1.0683	-0.0801	-0.0518	-0.1827
110046	-0.0666	-0.0772	-0.4011	0.1941	-0.2192	0.1587	-0.1532	0.3157	0.4641	0.6699	-0.1582	0.082	0.033	0.2257	0.1411	-0.0367	0.3505	0.126	0.3225	0.5053	-0.1854	-0.3098	-0.1398	-0.0933	-0.0458	0.2166	-0.1251	0.1379	0.3125	-0.3647	-0.164	-0.5085	-0.3339	-0.1582	0.1111	-0.3053	0.0985	0.402	0.6437	-0.1072	-0.1094	0.7303	-0.1108	-0.0254	-0.3341	0.1294	-0.0288	0.1958	-0.0158
110074	0.7892	-0.5804	1.0441	-0.5144	-0.6945	0.4879	-0.604	-0.249	-0.0673	-0.0182	-0.2321	0.4127	-0.186	0.183	-1.1287	-0.7453	0.2019	-0.3968	-0.5247	-0.2666	-0.6435	-0.049	-0.0148	0.0828	0.2893	-0.2081	-0.6301	0.2917	-0.2147	0.2419	1.1572	-0.5757	-0.242	0.2662	0.3761	-0.3575	0.112	0.153	-0.7262	0.4537	0.1856	1.1344	-0.4301	0.2325	0.6886	0.2656	-0.2123	-0.4542	0.0784
110081	-0.6049	0.1654	-0.6269	-0.0993	-0.7434	0.2074	-0.8158	0.226	-0.0582	-0.2158	0.3456	0.2998	0.035	-0.0045	-0.4093	-0.4175	-0.0891	-0.5409	0.1084	0.1573	-0.7237	0.1794	-0.4798	-0.3494	0.1529	-0.3302	0.1866	0.0907	0.4508	0.2613	0.2342	-0.2184	0.4089	-0.1678	-0.1777	0.7625	-0.2752	-0.1361	0.0052	-0.0767	-0.4642	0.0354	-0.5274	-0.3519	-0.0087	-0.2027	-0.89	-0.0436	0.5441
110153	-0.1045	-0.0484	0.2391	-0.1275	0.2491	-0.3194	-0.2361	-0.4656	0.5658	-0.5132	0.0229	-0.3281	-0.1384	0.5259	-0.0485	0.0972	-0.3434	-0.3069	-0.1182	0.0921	0.2697	0.1693	0.376	0.0942	-0.1454	-0.006	0.1705	-0.8238	0.192	0.557	0.0965	0.4751	-0.2166	0.1399	0.0525	0.128	-0.3712	0.0168	-0.483	0.3533	0.0713	-0.6785	0.1167	-0.1802	0.0425	0.1955	0.2275	-0.0317	-0.3992
110161	-0.3881	-0.632	-0.9806	0.1203	-0.1506	0.3004	-0.0282	0.9332	0.3405	1.3397	-0.1365	0.1249	0.0414	0.0435	0.5344	-0.4244	0.4825	0.3583	0.9997	0.5482	-0.2682	-0.4694	-0.303	0.0513	-0.3172	0.3503	-0.4692	-0.0302	-0.2206	-0.8568	-0.1941	-0.4938	-0.1109	-0.9589	0.2955	-0.7922	1.2318	0.261	0.489	-0.8656	-0.822	0.7741	0.277	0.2647	-0.8833	-0.0402	0.3497	-0.4043	-0.062
110171	-0.451	-0.0004	0.0031	0.0347	-0.0437	-0.2131	-0.2338	-0.4018	0.0067	-0.2852	0.2607	-0.2044	0.1252	0.0495	-0.0843	0.0123	0.1688	-0.2259	-0.1822	-0.4107	0.1389	-0.0704	0.1933	-0.1322	0.0621	-0.2888	0.2409	-0.4701	-1.0016	0.277	0.0766	0.1186	0.1058	0.2434	0.3134	0.2002	-0.4084	-0.3516	-0.3412	0.3009	0.0668	-0.4035	0.2921	-0.2364	0.1463	-0.2244	0.037	0.0175	0.0309
110176	0.1803	-0.0098	0.3966	-0.0414	0.2062	0.4176	-0.0835	-0.1807	-0.5377	-0.5261	0.1237	0.049	-0.2708	0.0924	0.0698	0.0019	-0.5967	-0.373	-0.0473	2.3583	0.2283	0.1961	0.1153	0.0923	0.0471	0.2423	0.1912	0.0804	-0.2846	0.3669	0.3338	0.1883	-0.2247	0.2036	-0.3994	-0.1791	-0.4544	0.4756	0.0973	0.2076	0.0065	0.1014	-0.161	0.2325	0.0989	0.2882	0.0514	-0.108	-0.353
110179	-0.2078	-0.6535	-0.4067	0.1088	-0.2041	0.078	-0.171	-0.6371	-0.5165	-0.2721	0.2894	-0.2609	-0.0812	0.0276	-0.0464	-0.3969	0.0978	-0.5895	0.0791	-0.2709	-0.2608	-0.0066	0.0699	0.3395	-0.1534	0.3557	0.0672	0.3283	0.215	0.104	-0.0456	-0.0215	0.3268	0.0043	0.2501	0.1752	-0.3058	0.1044	0.0046	-0.2349	-0.2963	0.1601	-0.3119	0.6746	-0.6366	0.0026	0.1782	-0.2248	0.3946
110183	-0.2204	-0.5908	-0.3233	0.3292	-0.0556	0.1386	-0.0559	-0.31	0.0977	0.1806	0.2564	0.1458	-0.0886	-0.0517	0.2263	-0.0377	0.2211	0.0517	0.094	-0.5082	-0.0386	-0.1535	-0.2185	-0.0669	-0.1202	-0.2574	-0.0004	0.3996	-0.3121	-0.078	0.3079	-0.0157	-0.0074	0.0795	0.0306	0.5536	-0.0335	-0.412	0.1154	-0.0998	-0.059	-0.1726	-0.0154	0.0941	-0.0905	-0.1393	-0.0944	-0.2046	0.3772
110188	0.6253	-0.5091	0.0674	-0.1282	0.1853	-0.5636	-0.1478	-0.6808	0.2969	0.6568	-0.7282	-0.7203	-0.782	0.2225	0.1367	0.3624	-0.1057	-0.4388	-0.7537	0.554	-0.132	-0.0401	0.4163	0.5511	0.423	0.2376	-0.0919	-0.9824	0.4331	-0.3916	-0.4	0.1503	-0.1866	0.0506	-0.015	0.3208	-0.3795	-0.2024	0.235	0.5436	-0.5796	-0.0418	-0.0639	-0.5981	0.6926	0.4474	-0.4478	-0.4653	0.6449
110198	-0.0823	-0.3032	-0.3485	0.2107	-0.5193	0.0325	0.4445	0.1555	-0.3	-0.253	0.4375	0.0914	-0.1626	-0.1476	-0.3854	-0.2096	0.3535	-0.0835	0.151	-0.123	-0.335	-0.0936	0.1261	0.2237	-0.6247	0.3147	0.3801	0.6274	0.5894	0.2626	-0.7355	0.47	0.4636	0.2977	0.4708	-0.0115	0.0365	0.5344	0.1152	-0.2051	-0.2413	0.1402	-0.1417	0.353	-0.3145	0.1126	0.4121	0.2358	0.2667
110205	0.0991	0.2633	0.0393	0.1572	0.0017	0.2603	0.2664	0.3265	-0.092	0.5158	0.1154	-0.101	0.2718	-0.0598	0.1769	-0.2039	0.0569	0.0027	0.2368	0.1418	-0.2095	-0.1013	0.0165	-0.1346	0.0351	0.0288	-0.0716	0.0239	-1.3871	-0.1346	-0.0095	-0.0272	-0.1274	-0.2666	0.1837	-0.488	0.2027	-0.0132	0.1404	0.0501	-0.332	0.2261	0.0196	0.1234	-0.4478	0.0511	0.3782	0.023	-0.1871
110210	-0.3126	-0.7715	-0.7675	0.4245	0.3203	-0.278	-0.2325	-0.497	-0.572	-0.3021	0.4031	0.3967	-0.0814	0.1226	-0.8007	-0.3188	-0.1174	-0.169	0.4178	0.2042	-0.2413	0.0836	-0.0093	0.7485	-0.0924	0.8277	0.7291	0.3337	-0.1681	-0.204	0.3711	0.1529	0.1282	0.6779	0.3922	0.2523	0.513	0.6741	0.2636	-0.6068	-0.6271	0.3752	-0.5843	0.5741	-0.8182	-0.0128	0.876	-0.2017	0.6591
110226	-0.3468	-0.5229	-0.6692	0.2021	0.3046	0.0908	0.1149	0.3741	0.4461	0.3454	0.0836	0.0639	-0.1032	0.029	0.1195	-0.3888	-0.2315	0.6823	0.3495	0.6067	0.0273	-0.3495	-0.1674	-0.0628	-0.1429	0.0901	-0.2741	0.3005	0.0455	-0.5601	-0.1833	-0.1951	0.0339	0.0707	0.3902	-0.0242	0.3592	0.3399	0.3112	-0.1365	-0.3228	0.4286	0.436	-0.2281	-0.3776	0.1066	0.0995	-0.0224	0.047
110243	-0.4325	0.9428	0.1292	-0.5344	-0.2578	1.3351	0.0581	0.7739	0.4228	-0.2258	0.6126	-1.0447	-0.472	-0.1349	-0.7931	-0.0126	0.6369	0.6509	-0.1405	-0.1517	-0.3909	-0.298	-0.1529	0.1406	0.2015	-0.2663	-0.1259	1.6967	-0.4716	0.7288	1.6898	0.5846	1.4439	0.1894	-0.6627	-0.0567	-0.2874	-0.1608	-0.2446	0.546	-0.0329	0.6962	-0.0813	-0.0186	-0.3912	0.1754	-0.4397	0.2715	-0.6585
110268	0.1416	-0.4178	0.0252	-0.0708	-0.0331	-0.0593	0.0925	-0.5131	-0.0419	0.0497	0.0544	-0.2059	0.0493	0.2589	0.4126	0.0526	-0.377	-0.2242	-0.1258	0.0109	0.1646	0.3543	0.5241	0.4017	0.1446	0.4992	0.1296	-0.1336	-0.0974	0.1144	0.5286	0.2676	0.1943	0.4772	0.065	0.0743	-0.2887	0.0457	-0.1983	0.0533	-0.2113	0.0917	0.125	0.2198	0.2343	0.1945	0.2067	0.1125	0.3493
110310	0.0729	0.0723	-0.2543	0.0039	-0.0882	0.8192	-0.0943	-0.5731	0.0508	0.28	0.0143	0.0582	-0.4017	0.1365	0.3125	-0.2604	0.2728	-0.2325	-0.091	-0.2163	-0.0924	0.1364	-0.2376	0.207	0.2133	0.1213	-0.2445	0.6134	0.5926	0.1069	0.5553	0.013	0.5958	-0.1083	-0.3323	-0.0136	-0.0226	0.2082	0.0445	-0.1532	-0.115	-0.0085	-0.0143	0.2313	-0.0861	0.3112	-0.0858	-0.0355	0.243
110330	-0.2173	-0.5271	-0.5942	0.2481	-0.1517	0.2833	0.0006	-0.3618	-0.435	-0.0313	0.3334	0.0416	-0.0701	-0.0557	0.1736	-0.2037	0.0852	-0.0077	0.2959	0.2365	-0.2768	-0.0926	0.0533	0.2245	0.054	0.3223	0.0545	0.2653	0.3006	-0.0137	-0.3014	0.2611	0.1982	-0.0391	0.4698	-0.5558	-0.0409	0.506	0.2866	-0.0292	-0.2096	0.1172	-0.1935	0.1199	-0.3784	0.0275	0.2769	-0.0786	0.1452
110411	0.8628	-0.1117	0.1246	-0.2541	0.1855	0.465	0.8722	0.775	0.1852	0.9682	-0.2235	-0.3967	0.1096	0.0858	0.575	0.3467	0.4188	0.467	0.3474	0.1989	0.6543	0.2483	0.4928	-0.0165	0.901	0.5137	0.0004	-0.0981	0.5825	-0.3841	0.1832	-0.0388	-0.316	-0.5402	-0.7406	-0.8887	0.2861	0.8305	0.2974	0.2495	0.0432	0.5108	0.4651	0.545	0.7281	0.9206	-0.2019	-0.0907	-0.407
110417	0.0783	-0.1901	0.2154	-0.2128	-0.1457	0.0268	0.0782	-0.6054	-0.3092	-0.4428	-0.0819	0.0437	-0.1815	0.2182	-0.3303	0.501	-0.119	-0.871	-0.5179	0.1101	-0.1093	0.2734	0.2773	0.4867	0.0474	0.1079	0.0265	-0.566	-0.0043	-0.1036	0.3031	0.2969	-0.0267	0.268	-0.3758	0.2583	-0.4086	0.3541	0.0923	0.1262	0.1009	0.6246	-0.2659	-0.6185	0.2249	0.3517	0.1157	-0.075	0.3848
110418	0.2341	-0.2145	0.1813	-0.4388	-0.0364	0.5087	-0.6049	-0.5983	0.0264	1.1289	-0.7652	-0.3539	-0.0569	-0.0227	0.2104	0.239	0.0077	-0.2291	0.1964	-0.3577	0.7152	-0.6331	-0.1708	0.2434	0.7293	-0.2618	-0.3508	-0.611	-1.2789	-0.4114	0.2191	-0.2024	-0.4326	-0.1126	-1.3144	0.0956	0.0603	0.1525	-0.6851	0.1381	-0.488	-0.5131	0.234	0.2622	0.4661	1.0737	-0.729	-0.4307	2.3649
110460	-0.0151	-0.3389	0.1953	-0.4423	-0.2015	0.9705	-0.1914	-0.0748	0.0352	0.3734	0.0168	-0.787	-0.4306	0.0893	-0.7262	0.0712	-0.2032	-0.7343	0.0089	0.7781	-0.8329	-0.2097	0.1571	0.3246	0.16	0.4168	0.0541	0.1706	-0.5826	-0.2377	1.2627	0.0404	0.0195	0.1386	-0.4179	0.0086	-0.3613	0.3302	0.2559	0.2337	-0.1929	0.6017	-0.166	-0.6731	0.1247	-0.0219	0.4112	-0.2234	0.0417
110461	0.4507	-0.438	0.3408	0.3656	0.2008	-0.6846	-0.3444	-0.4954	-0.6743	-0.4638	-0.1323	-0.4459	-0.0593	0.3222	0.1792	0.1365	-0.3998	-0.1445	-0.5409	-0.5328	0.3758	-0.1239	0.0786	0.295	0.3806	0.1627	-0.0461	-0.5994	-0.5164	0.3333	0.1854	0.1132	-0.3311	-0.0883	-0.0511	-0.1676	-0.6259	-0.5494	-0.7001	0.0053	0.3499	-0.2775	0.3306	-0.4158	0.2732	-0.3125	0.0959	-0.0075	-0.4878
110462	0.0462	-0.1221	-0.3914	-0.2105	-0.0535	0.4684	-0.1327	0.3504	0.4597	0.4523	-0.21	0.015	-0.4629	-0.0884	-0.0449	-0.0835	0.0179	-0.5683	-0.1814	-0.1908	-0.2306	-0.1369	-0.4418	-0.375	-0.0395	-0.1702	-0.2776	0.2902	0.2974	-0.2148	0.6289	-0.2072	0.1766	-0.2982	-0.2979	0.0279	0.0416	0.3866	0.3939	-0.1832	-0.3752	0.3186	-0.2621	0.0206	-0.1654	0.2131	-0.322	-0.1319	0.403
110475	-0.066	0.1512	0.6902	0.1226	0.2168	-0.705	-0.1369	-0.218	-0.3195	-0.4986	0.0973	0.0041	0.2803	-0.0269	-0.0645	0.2378	-0.1927	-0.001	-0.2866	-0.4048	0.1963	-0.0844	0.108	-0.0604	0.1462	-0.5359	0.1253	-0.3056	-0.4814	0.4986	-0.0815	0.0957	0.0507	0.1936	0.2057	0.0959	-0.0938	-1.0128	-0.4236	0.1687	0.4464	-0.6861	-0.1148	-0.4371	0.0238	-0.5701	-0.1078	0.1887	-0.564
110477	-0.4063	-0.1105	-0.3899	-0.1955	0.2901	0.2043	0.5316	0.1737	-0.2191	-0.2793	0.436	0.4182	0.2828	0.2566	-0.1937	0.099	-0.4246	0.1529	0.0585	0.2658	0.343	0.476	0.3528	0.0393	0.2667	0.4269	0.5808	0.4035	0.1287	0.1803	0.0288	0.3956	-0.1027	0.3058	-0.1259	0.184	-0.0987	0.6205	0.0372	0.2336	-0.1946	0.4659	0.3503	0.3783	0.5122	0.64	0.4959	0.1771	-0.008
110496	0.1739	-0.1876	0.8637	-0.8084	-0.4672	-0.078	-0.2434	-1.2411	0.067	-0.2029	-0.0684	-0.0469	-0.8125	0.6515	-0.1449	-0.0916	-0.7846	-0.0784	-1.2109	-0.7457	0.1398	0.2313	-0.2394	0.5421	-0.0415	0.5249	-0.2923	-0.3159	-0.1635	0.0738	0.5853	-0.0207	-0.1418	0.0391	-0.7707	0.04	-1.0111	-0.1509	-1.3662	-0.1974	0.6807	-0.4395	0.5424	-0.0518	0.4786	0.1461	-0.044	-0.4986	0.2929
110507	-0.3844	-0.7995	-0.778	-0.008	-0.0717	-0.0075	-0.1231	0.8501	0.2305	0.9615	-0.1572	0.032	0.1463	-0.082	0.3132	-0.3497	0.0599	0.2639	0.5653	0.066	-0.4089	-0.3838	-0.058	-0.1877	-0.0257	0.4699	-0.5365	-0.057	-1.3581	-0.743	-0.2574	-0.5774	-0.2648	-0.6356	0.4244	-0.4806	0.6098	-0.925	0.4414	-0.332	-0.3849	0.131	0.2028	0.2444	-0.7708	-0.3681	0.313	-0.1523	-0.0623
110557	-0.0924	-0.8376	0.9128	-0.4491	-0.4475	0.4504	-0.5243	0.1994	0.6785	-0.0594	0.5861	0.4061	0.4595	0.3387	-0.8865	-0.3871	0.7796	-0.6485	-0.2852	-0.2915	-0.249	0.6244	0.4305	0.9469	-0.4194	0.2113	-0.2917	0.6522	0.9995	-0.064	0.5446	0.1567	0.1574	0.2847	-0.4385	0.5541	-0.3536	0.8304	-0.3241	0.6737	-0.8546	0.4933	0.0343	0.6463	0.5208	0.143	0.0334	0.1832	0.6952
110562	-0.0487	0.2793	-0.3049	-0.0701	-0.0599	0.4296	0.0308	0.414	0.3238	0.2298	0.0647	0.1271	0.194	-0.2296	-0.1987	-0.0828	0.1122	-0.0762	0.2052	0.1379	-0.1898	0.1169	-0.154	-0.1096	-0.3341	0.0951	-0.0605	0.4085	0.6729	-0.3055	0.1488	-0.0881	0.1321	-0.1515	-0.1317	-0.0387	0.1204	0.5449	0.5571	0.0695	-0.1849	0.3116	0.0318	0.1585	-0.0519	0.1503	0.0747	0.0468	0.4594
110576	0.035	-0.3961	-0.171	-0.4216	0.2636	-0.1808	0.0013	-0.6189	-0.0569	-0.1241	-0.5678	-0.2665	-0.5691	0.2969	-0.4175	0.4333	-0.1332	-0.6825	-0.6006	0.3644	-0.2757	0.2186	0.3618	0.3216	0.0138	0.4634	-0.0369	-0.7874	0.5274	-0.2168	0.1083	0.2709	0.0829	0.4088	-0.1798	0.1379	-0.3639	0.4569	0.006	0.0078	0.0186	0.1421	-0.2028	-0.4831	0.4134	0.2241	0.0462	-0.3434	0.503
110587	-0.1414	-0.1516	1.031	-0.7429	-0.2444	1.0033	0.7849	0.3358	-0.0803	0.0003	0.6717	0.2458	1.057	0.2864	-0.3063	-0.0621	0.2862	0.3957	-0.0874	-0.21	0.0738	0.7834	0.7567	0.3625	-0.0047	0.7731	-0.0143	1.1727	0.463	0.1487	1.2717	0.5971	0.108	-0.179	-1.3124	0.6776	-0.1951	0.7342	0.1927	0.7573	-0.3973	0.2413	0.6151	1.0185	0.802	0.7286	0.1265	0.3612	1.0359
110602	0.609	-0.6658	0.3637	-0.5431	-0.1649	-0.1597	0.0117	-0.3648	0.0028	-0.0716	-0.4367	-0.2021	-0.3823	0.3963	0.3004	0.2242	-0.0822	-0.4857	-0.597	-0.2583	0.1143	-0.0387	0.3628	0.681	0.3756	0.1775	-0.1535	-0.3998	0.3857	-0.258	0.2848	-0.1423	0.1664	-0.1262	-0.7908	-0.3823	-0.135	-0.2344	-0.6514	-0.1491	0.2124	-0.2763	0.1911	-0.5203	0.3592	0.3205	-0.2892	-0.4624	0.329
110608	-0.7038	-0.1801	-0.2406	0.2058	0.1147	0.0887	0.2089	-0.1708	-0.4588	-0.2807	0.4236	0.4648	0.0365	0.0682	0.0004	-0.3432	-0.3311	0.0835	0.25	-0.1761	0.0214	0.149	-0.0641	-0.0645	-0.0109	0.4534	0.3875	0.1155	-0.1074	0.2336	-0.6299	0.2811	-0.1481	0.2832	0.2771	-0.0445	-0.2461	0.7428	0.0097	0.1425	-0.0257	0.043	0.1885	0.2678	0.0289	0.6497	0.3846	0.3099	-0.0436
110609	0.6388	0.3321	0.3637	-0.3025	-0.4059	0.8059	-0.0764	0.8085	0.7704	0.4286	0.4024	0.1819	0.3415	0.0647	-0.2986	-0.2574	0.3834	0.5366	0.2524	0.1636	-0.1715	0.3123	0.4695	0.4003	-0.2065	0.0618	-0.0737	0.6023	0.7672	-0.2892	1.0702	0.074	0.3012	-0.2616	-0.1091	0.3401	0.0528	0.4222	-0.0416	0.0447	-0.3157	-0.0987	0.214	0.4264	0.5007	0.2561	-0.0239	0.344	0.1539
110611	0.0941	0.2731	0.5378	0.0376	-0.0348	-0.3722	-0.2482	-0.4048	0.113	-0.6032	0.1225	-0.0358	-0.0836	0.0129	-0.0408	-0.2331	0.2676	-0.2638	0.0814	0.1353	0.0485	0.1152	-0.3445	-0.011	0.0307	-0.4479	-0.0476	-0.2135	1.2327	0.5738	0.0274	0.2662	-0.0245	0.1495	0.0293	0.4322	-0.2969	0.4443	-0.2487	0.202	0.329	-0.1882	-0.034	-0.1837	0.0614	-0.5142	-0.0243	0.3385	-0.3015
110634	-0.3395	-0.7205	-0.4369	0.1044	-0.1121	-0.0975	0.1674	0.3706	-0.0458	0.3253	0.1506	-0.097	0.1558	0.0034	0.2382	-0.332	-0.07	0.0867	0.4165	0.2861	-0.3152	-0.2051	-0.4227	0.0097	-0.1889	0.1081	-0.1777	0.0663	-0.4753	-0.3021	-0.2475	-0.2805	0.0032	-0.6561	0.3186	-0.321	0.5056	-0.4145	0.2337	-0.1347	-0.0593	0.0305	-0.0591	0.1456	-0.4755	-0.5115	0.0521	-0.1844	-0.2529
110649	0.343	-0.0298	-0.1055	-0.0006	0.7986	0.4284	0.4067	-0.0617	-0.8131	-0.1634	-0.1383	-0.1458	0.2355	0.1776	0.4187	0.1687	-0.0112	0.3663	0.4022	-0.0256	0.0717	0.9756	1.2111	0.1462	0.0494	0.4161	0.6124	0.5307	0.6118	-0.0211	0.2669	0.2843	-0.7752	-0.2292	-0.1246	0.2797	-0.223	0.7456	0.5886	-0.2401	-0.0684	0.2127	0.7806	0.4794	0.624	0.9678	0.1143	0.6936	0.2777
110675	0.6402	-0.0503	-0.4413	0.2422	-0.1774	0.2817	0.3318	0.9572	0.3332	0.8844	-0.1142	0.0155	0.4559	-0.2296	0.1064	-0.2937	0.3658	0.0901	0.5816	0.2722	-0.3108	-0.2103	-0.2592	-0.4011	0.1485	0.0644	0.1036	0.3412	0.8094	-0.4184	-0.6502	-0.1547	0.0082	-0.6184	0.2164	-0.3846	0.5296	0.803	0.8324	-0.2294	-0.5413	0.6127	-0.1804	-0.0355	-0.5881	0.3488	0.2477	-0.0027	0.0723
110689	-0.007	-0.1244	-0.2205	0.1027	-0.1798	0.2352	-0.0095	-0.2665	0.0911	-0.0003	0.2595	0.281	0.0439	0.0073	-0.2471	0.0579	-0.1024	-0.346	-0.0505	-0.0269	-0.2003	0.1272	0.2428	0.099	-0.1073	0.089	0.2136	-0.0097	0.2678	-0.1095	0.1116	0.184	0.0819	0.1241	0.1768	0.3118	-0.0028	0.3675	0.2063	0.1141	-0.2385	0.236	-0.0499	-0.0352	0.2794	0.1466	0.1676	-0.1643	0.3554
110703	0.8198	-0.3858	0.0845	-0.2621	0.0072	-0.0233	0.2408	0.1629	0.2354	0.4716	-0.2468	-0.3281	0.0017	0.404	0.5131	0.296	0.3011	-0.0816	0.0208	0.1726	0.3827	0.2405	0.4713	0.2744	0.7071	0.7365	-0.1429	0.0955	0.5898	-0.3154	0.4374	-0.157	-0.0918	-0.236	-0.2701	-0.312	0.123	0.213	0.0709	0.0756	-0.0917	-0.0043	0.182	0.3398	0.3313	0.521	-0.0304	-0.2078	0.0964
110704	-0.6655	-0.745	-0.6207	0.3352	-0.2687	0.1385	-0.1807	-0.604	-0.6082	-0.3828	0.2219	-0.0695	-0.4457	0.3053	0.2983	-0.2706	0.0718	-0.6692	0.1114	-0.048	-0.9224	0.1547	-0.4968	0.0611	-0.1246	0.2353	-0.1105	-0.1535	-0.1799	-0.0351	-0.2209	0.0389	0.1967	0.0431	0.4473	0.7117	-0.2119	0.2673	0.4222	-0.0816	-0.1408	-0.5102	-0.1178	0.2644	-0.6194	-0.2349	0.1476	-0.0143	0.59
110709	-0.1033	-1.5039	-1.4758	0.8209	0.4619	-0.2715	-0.0037	-0.0144	0.1548	0.1382	0.3434	0.7032	-0.545	0.0018	-0.5375	-0.5186	0.2664	0.3845	0.6224	0.226	-0.7383	-0.209	0.2605	0.8382	-0.0465	1.0261	0.8962	0.7535	0.1239	-0.4723	0.4023	-0.2081	0.0136	0.7336	0.1878	0.7201	0.7189	0.7817	0.5698	-1.4905	-0.9005	0.2989	-1.198	1.0422	-0.6932	0.0988	1.3358	0.0488	0.4614
110718	-0.0741	0.4001	0.0499	-0.1662	0.2263	-0.0216	-0.2533	0.5336	0.5409	0.062	-0.2056	0.2089	0.1949	-0.4493	-0.1576	-0.0974	-0.0557	0.4729	0.1947	0.034	-0.01	-0.1673	-0.0352	-0.4326	-0.4196	-0.6955	-0.3298	0.1025	-0.2711	-0.3725	-0.5094	-0.049	0.1306	-0.0655	0.3199	0.033	0.3842	-0.7178	0.0207	-0.2275	0.0892	-0.4059	-0.3353	-0.175	0.0513	-0.6338	-0.648	0.0939	-0.2893
110745	-0.4492	-0.6003	-0.923	0.1676	0.1443	0.4355	0.2947	0.2744	-0.2861	0.206	0.4291	0.0889	-0.0257	-0.1366	-0.0421	-0.4537	-0.7224	-0.0572	0.4207	-0.1077	-0.3634	-0.0982	-0.0563	-0.0603	-0.2602	0.3769	-0.1174	0.0307	-0.8363	-0.1418	-0.5226	0.0264	0.122	-0.4596	0.3374	-0.64	0.4463	-0.0105	0.0305	-0.196	-0.507	0.097	-0.1528	0.2715	-0.1042	0.1302	0.2646	-0.3504	-0.2067
110763	-0.14	-0.0487	-0.3793	0.3452	0.1822	0.3802	0.349	0.8656	-0.3002	0.1425	0.3043	0.1925	0.2704	0.0145	0.4139	-0.1215	-0.1061	-0.0173	0.3919	0.0962	0.0422	-0.1182	-0.2185	-0.3326	-0.0064	0.2834	0.2592	0.4313	0.1478	0.1105	-0.2464	0.1306	-0.3819	0.0927	0.0244	-0.5378	-0.1573	0.8001	0.7315	0.0486	0.0207	0.5971	0.1916	0.3067	-0.4694	0.8417	0.2172	0.1326	0.1655
110781	0.3725	-0.2439	0.0478	-0.2715	0.0004	-0.0277	-0.057	-0.0411	0.211	0.0459	-0.1316	-0.1438	-0.2606	-0.0869	0.1114	0.0415	-0.3104	-0.006	-0.2253	-0.3097	-0.1103	0.182	-0.1192	-0.0193	-0.0392	0.044	0.0644	0.3522	0.1198	-0.0457	-0.0112	-0.143	-0.0803	-0.0506	-0.0541	0.2528	-0.0557	0.1539	-0.0707	0.0942	0.1194	-0.0416	0.1511	0.1253	0.2123	0.0814	-0.0779	-0.2851	0.3728
110790	-0.0102	-0.0901	-0.1692	0.159	0.0015	0.4652	0.3753	-0.3982	-0.4954	-0.116	0.4511	0.3965	0.1083	0.2658	0.1659	0.3898	0.0728	0.0027	0.3507	0.1203	0.2931	0.2582	0.4069	0.4608	0.4681	0.2508	0.6052	0.3144	0.5164	0.2263	0.622	0.2824	0.3528	0.5044	-0.0695	0.3943	0.2245	0.2919	-0.1129	0.0609	-0.3309	0.0955	-0.0231	0.4318	0.097	0.3031	0.4464	0.1152	0.0961
110791	-0.3467	0.2592	-0.3177	0.1289	-0.105	0.2559	-0.0671	-0.4638	-0.1866	-0.3093	0.2048	0.4875	-0.0514	0.095	-0.1627	-0.3288	0.1141	-0.2116	0.2283	0.1357	-0.2434	0.2926	-0.1253	0.1218	-0.1612	0.2499	0.3582	0.4819	0.5832	0.3219	-0.108	0.2123	0.3189	-0.0439	-0.083	0.0012	-0.2003	0.8087	0.1574	0.0866	-0.2085	0.4986	0.0162	0.1911	-0.0773	0.3762	0.3661	0.2283	0.3205
110799	-0.168	0.3668	-0.036	0.0419	-0.4063	1.0034	-0.3606	-0.1933	0.0739	0.5398	-0.2822	0.1299	0.217	-0.1519	-0.0768	-0.4646	0.1399	-0.1654	-0.2387	0.0494	-0.1189	-0.0291	-0.0359	0.1311	-0.1838	-0.2552	0.0441	0.4269	0.1128	0.2127	0.4264	-0.1603	0.2478	-0.0184	-0.2105	0.155	-0.2268	-0.0652	0.2166	0.1712	0.0368	-0.013	-0.2137	0.0821	-0.0566	-0.0343	-0.3835	0.1827	0.4499
110802	-0.132	0.1614	-0.3087	0.144	0.0791	-0.0576	0.0798	0.5171	0.0768	0.4356	0.072	-0.0961	0.3658	-0.1022	-0.2594	-0.2683	0.183	0.0157	0.0757	0.0028	-0.1363	-0.2533	-0.0495	-0.2841	-0.0306	-0.1139	-0.1632	-0.0186	-0.9444	-0.4445	-0.2637	-0.2424	-0.0436	-0.2	0.2098	-0.2179	0.4864	-0.7565	0.4195	-0.117	-0.2115	-0.1619	-0.0066	0.1876	-0.2954	-0.3399	0.1766	0.1148	-0.2022
110804	-0.0549	-0.3024	-0.0337	-0.0595	-0.1488	0.2989	0.147	-0.337	-0.1436	0.0594	-0.274	-0.0947	-0.1514	0.0504	0.171	0.2158	0.193	-0.3513	0.2406	0.1085	-0.0558	-0.0135	0.0381	0.3057	0.0733	0.3725	0.1458	0.2776	0.342	-0.0668	0.3154	-0.0475	0.1986	0.0908	-0.0882	-0.0647	-0.2427	0.4198	0.0281	-0.0296	-0.087	0.1005	-0.0108	0.1405	0.1823	0.3367	0.2076	-0.2324	0.1071
110807	0.229	-0.1671	-0.2286	-0.2369	-0.0392	0.4154	0.1015	0.3162	0.4772	0.4222	-0.1611	-0.1727	-0.1388	0.0066	-0.1264	-0.1878	-0.2509	0.0507	-0.1948	-0.0934	-0.1701	-0.3049	0.0067	-0.0949	-0.0908	-0.0022	-0.3426	0.1403	-0.1685	-0.2879	0.2116	-0.2373	-0.2142	-0.1921	-0.3778	-0.0628	0.1143	0.2372	-0.0065	-0.2085	-0.166	0.2941	0.256	0.2508	0.1579	0.4283	-0.1566	0.0256	0.1914
110811	-0.4051	0.1146	0.0044	0.3287	-0.2478	-0.0489	-0.1715	-0.5309	0.1786	-0.3799	0.2113	0.3134	-0.0185	-0.2875	-0.3104	0.0201	0.0331	-0.0654	-0.3372	0.2785	0.2695	-0.0895	-0.224	-0.1885	-0.3663	-0.023	0.0582	0.3473	0.2307	-0.1163	-0.2947	-0.2417	0.0355	0.443	0.2507	0.0432	0.1197	-0.193	-0.0785	-0.3048	0.2398	-0.3314	-0.1696	-0.2357	-0.2208	-0.4865	-0.1517	-0.0251	0.1998
110819	0.0285	0.3854	0.3888	-0.031	-0.3183	-0.1834	-0.2188	0.431	0.3463	0.1446	-0.2387	0.1406	-0.3432	-0.0427	0.1728	0.0564	0.2097	0.224	-0.1613	-0.1007	-0.0173	0.1011	-0.2321	-0.0715	-0.2247	-0.6829	0.1179	0.0527	0.4095	-0.0805	-0.4085	-0.384	0.3973	-0.4811	0.0947	0.2471	0.2651	-0.521	0.3623	-0.1984	0.2116	-0.0655	-0.6318	-0.2434	0.5001	-0.5999	-0.5302	-0.1027	0.2121
110829	0.1797	0.0679	-0.1754	-0.1162	-0.183	0.0615	0.048	-0.1415	-0.2248	-0.0215	0.2081	0.2268	0.0112	0.1389	0.0696	-0.1481	0.0618	-0.2943	0.1143	-0.1356	-0.1284	0.448	0.0118	0.1627	-0.0665	0.134	0.1624	0.4081	0.6225	0.0463	-0.0898	0.1725	0.1852	0.0684	-0.1268	0.2247	-0.1231	0.6492	0.3121	0.1256	-0.3359	0.2959	-0.0684	0.45	-0.1948	0.298	0.2404	0.0985	0.4324
110884	0.5906	-0.4634	-0.0429	-0.2558	0.115	0.3533	0.514	0.706	0.0819	0.5997	-0.298	-0.0858	0.0384	0.0033	0.3219	0.3264	0.2612	0.4318	0.4305	-0.1729	0.3167	0.0472	0.3868	0.109	0.7632	0.4558	0.2281	0.1333	0.2274	-0.3152	0.0515	-0.3074	-0.4631	-0.2755	-0.3547	-0.7436	0.1553	0.6988	0.201	0.0193	-0.1645	0.1017	0.2985	0.2212	0.102	0.741	-0.1289	-0.1264	-0.4617
110900	0.7658	0.1371	-0.0882	-0.9085	-0.2358	0.7206	-0.4512	-0.647	-0.0678	0.452	-0.6317	-0.2926	-0.9293	0.2376	-0.5898	0.0158	-0.3844	-0.6277	-1.1738	-0.516	-0.1936	-0.2924	-0.3984	0.3734	0.6565	0.1605	-0.361	0.4067	0.299	-0.451	0.8359	-0.2915	0.2169	-0.2694	-0.9741	-0.3233	-0.2228	-0.7793	-0.7328	-0.0908	0.1767	-0.4049	0.2885	-0.0178	0.5376	-0.5105	-0.4142	-1.0083	0.2237
110905	0.311	-0.2326	-0.0717	-0.0084	-0.1331	0.2978	-0.0574	-0.0889	0.2035	0.3377	-0.1021	0.0276	-0.2134	0.0325	0.2039	0.0143	0.351	-0.1035	0.1925	0.1004	0.0867	0.1436	-0.0531	0.169	0.1577	0.1117	0.037	0.5776	0.5301	-0.1892	0.2255	0.161	-0.0382	0.1547	-0.1966	-0.0995	-0.0446	0.6229	0.261	0.0184	0.081	0.5041	0.1035	0.2865	0.0239	0.3335	0.0187	0.2868	0.4475
110914	-0.2274	0.1112	0.2294	-0.022	-0.1787	0.1115	-0.2595	-0.1453	-0.1149	-0.1456	0.2403	0.0632	0.294	-0.2284	-0.203	0.0725	-0.2326	0.0039	-0.3466	-1.3937	-0.0584	0.0192	-0.0519	-0.3769	-0.3626	-0.2898	-0.0217	0.0897	-0.08	0.4662	0.0311	0.0143	0.0899	0.0473	-0.1621	0.0639	-0.171	0.2027	-0.5053	0.0556	-0.0595	-0.003	-0.066	0.1143	0.0245	-0.0527	-0.1799	0.0594	1.5457
110926	0.865	-0.3216	-0.4096	-0.2695	0.4308	0.4217	0.5706	0.5132	0.137	0.5815	-0.0886	-0.3252	-0.0065	0.0345	0.5156	0.457	-0.1243	0.1072	0.4295	0.2741	0.4855	0.0324	0.4847	0.1434	0.7308	0.6316	-0.1288	0.0408	0.4718	-0.399	0.0646	-0.3269	-0.0478	-0.4994	-0.4126	-0.6742	0.462	0.3829	-0.0154	0.0027	0.0426	0.374	0.3752	0.2587	0.5565	0.6763	-0.0059	0.0051	-0.3853
110928	-0.2016	0.4005	-0.1678	0.0181	-0.0716	-0.135	0.0555	-0.2704	-0.2931	-0.6287	0.1079	-0.2478	0.0535	0.1983	0.0155	0.0516	-0.0764	-0.3886	-0.1697	-0.2403	0.1167	0.0808	-0.1041	0.1683	0.2904	0.1023	-0.1196	0.238	0.1427	0.278	0.3252	0.3257	-0.0144	0.1251	0.0093	0.2327	-0.6058	0.3908	0.9391	0.1601	0.303	0.1487	-0.1386	-0.2239	-0.0531	0.1276	0.2874	0.0816	-0.0208
110931	-0.0403	-0.2129	-0.3175	0.2154	0.111	0.1505	0.4731	-0.163	-0.2424	0.2121	0.0803	0.0998	0.2141	0.2322	0.4474	-0.0098	0.3588	-0.0389	0.4712	-0.249	-0.081	0.1233	-0.1106	0.1135	0.2745	0.305	0.3856	0.1177	-0.0365	0.0062	-0.3528	0.2061	0.1057	-0.3112	0.019	-0.3736	0.0298	0.5125	0.4237	-0.0918	-0.291	0.3363	0.0342	0.1796	-0.0368	0.4325	0.4588	0.1675	0.0783
110960	0.0149	0.3269	0.3379	0.0213	-0.2372	-0.1463	-0.1787	-0.2587	-0.0114	-0.4648	0.0033	-0.0188	0.0814	0.0645	-0.1368	-0.0962	-0.1642	0.043	-0.1951	-0.1731	0.1526	-0.0828	-0.2616	-0.1236	-0.1281	-0.1321	-0.0263	0.0409	-0.4927	0.3573	-0.1494	0.1798	-0.3057	0.0511	0.1052	0.1881	-0.2094	-0.0525	-0.3032	0.079	0.2259	-0.2442	0.0189	-0.0868	0.3282	-0.1756	-0.051	0.04	-0.2611
110972	-0.1136	-0.0757	-0.2205	0.3043	-0.3552	0.397	0.1587	-0.0375	-0.0638	0.051	-0.2376	0.1536	-0.0674	-0.2046	-0.0953	-0.1457	0.2474	-0.0473	0.1832	0.3662	-0.0627	0.0011	-0.0579	-0.0178	-0.054	0.1071	0.1104	-0.0301	0.0729	-0.0556	-0.0669	0.2137	-0.2262	0.1064	-0.1747	-0.2156	0.2228	0.2705	0.1342	0.079	-0.2514	0.2701	-0.2186	0.1833	-0.2317	0.5085	-0.088	-0.0211	0.1409
110988	0.0258	0.3002	-0.0194	0.1193	0.0201	0.1848	0.111	0.535	0.1065	0.2971	-0.0625	0.2498	0.081	-0.0171	0.1143	0.0454	0.0926	0.19	0.3261	0.2128	-0.3148	0.0571	-0.3205	-0.1146	-0.2908	-0.0173	-0.1177	0.3375	0.4161	-0.284	-0.0672	-0.2643	-0.2041	-0.1035	0.1935	0.0605	0.3401	0.2915	0.4061	-0.6489	-0.0813	0.3317	-0.2058	0.0983	-0.1601	-0.0022	0.0565	0.2353	-0.1458
110995	-0.3552	-0.1534	-0.3552	0.1654	0.1477	-0.0326	-0.1017	-0.1207	-0.2077	0.0179	-0.0366	0.1512	0.1311	-0.0247	-0.0875	-0.1279	-0.0427	-0.1257	0.2915	0.0755	-0.3638	-0.0383	-0.1139	-0.0327	-0.4793	-0.0115	0.1788	0.4695	0.4421	-0.02	-0.1099	0.1636	0.1445	0.1457	0.1398	0.4212	-0.1501	0.3164	0.2142	-0.1392	-0.2136	0.2381	0.0274	0.181	-0.059	0.0348	-0.0115	0.111	0.4322
111003	0.2718	-0.1515	-0.9686	0.5693	0.1687	0.2917	0.0205	0.744	0.3044	0.9748	-0.1069	0.0467	-0.1109	-0.6826	0.5185	-0.1995	0.7436	0.425	1.159	0.3062	0.2316	-0.2218	-0.4859	-0.1769	0.2293	0.1562	-0.1368	0.6271	0.9268	-0.7593	-0.7882	-0.7758	-0.2587	-0.2747	0.3353	-0.8611	0.4024	0.8901	0.8999	-0.2265	-0.5403	0.6591	-0.1193	0.3006	-0.5484	0.2267	0.4139	0.0612	0.0411
111014	-0.0994	0.1874	0.6776	-0.0549	-0.0177	-0.4628	-0.3177	-0.501	-0.0755	-0.9763	0.0256	0.165	-0.0034	0.1172	-0.2138	0.191	-0.3903	0.1059	-0.3801	-0.2503	0.2016	0.0584	-0.0048	-0.1743	-0.1796	-0.573	0.3438	-0.1018	-0.7217	0.6808	0.0187	0.2789	-0.1096	0.0092	0.2692	0.2847	-0.0817	-0.5471	-0.6702	-0.0194	0.4122	-0.8728	0.011	-0.0861	0.1502	-0.4443	-0.0163	0.051	-0.8773
111016	-0.1817	-0.0913	-0.1713	0.3027	0.2392	0.149	0.2784	0.1822	-0.1905	-0.0801	-0.1098	0.229	0.2107	0.3071	0.0395	-0.2717	0.0103	-0.0512	0.226	0.2522	-0.1541	0.2848	0.0651	0.3111	-0.2064	-0.0404	0.2479	0.4451	0.3361	0.0778	-0.2611	0.3148	0.1514	-0.2607	0.1847	0.1361	-0.2632	0.5459	0.2252	0.0913	-0.6478	0.303	-0.0621	0.1604	0.0882	0.1274	0.3791	0.2893	0.1005
111032	0.6739	-0.5173	-0.1389	-0.8018	-0.3424	0.2677	-0.2598	0.4776	0.3184	0.3751	-0.7767	-0.278	-0.3158	0.073	0.6274	0.026	0.1808	-0.0027	-0.3891	-0.5822	0.0379	-0.0292	0.329	0.3946	0.821	0.2088	0.1774	-0.012	0.1286	-0.139	0.7049	-0.3652	0.1004	-0.1655	-0.4512	-0.3031	0.0828	0.1753	0.1772	-0.2054	-0.6894	0.421	0.3434	0.2743	0.5316	0.406	-0.6134	-0.6571	-0.1345
111054	-0.2743	0.4998	0.617	0.2083	0.1084	-1.1845	-0.1264	-0.0587	-0.1768	-0.7543	0.3123	-0.2438	0.4823	0.1449	-0.154	0.4141	-0.227	0.8955	-0.355	-0.0871	0.3153	-0.2013	0.1014	-0.1868	0.0045	-0.8809	-0.1283	-0.4749	-0.9729	0.4103	-0.1226	0.0555	-0.3185	0.0009	0.4416	-0.2079	-0.092	-1.3963	-0.5086	0.3506	0.4786	-0.6925	-0.0788	-0.8965	-0.0313	-0.4808	-0.1456	0.3073	-0.2672
111056	-0.0633	0.4098	0.5921	0.3573	-0.1475	-0.7707	-0.4137	-0.3754	-0.2605	-0.674	0.2668	-0.263	0.0633	0.0373	-0.1562	0.1704	0.1806	0.2798	-0.4978	-0.2367	0.1052	-0.1172	-0.176	-0.088	0.0263	-0.6815	-0.087	-0.3858	0.1916	0.4896	-0.141	-0.1259	-0.0982	0.2188	0.3543	0.3084	-0.361	-0.5115	-0.388	0.0561	0.5982	-0.5673	-0.1242	-0.4572	0.2002	-0.6995	-0.3242	0.285	-0.7574
111111	0.1322	-0.2566	-0.2819	0.2985	0.4148	-0.3014	-0.2537	-0.2719	-0.2667	0.4787	-0.1755	0.0192	0.0698	-0.1123	0.0838	-0.1448	-0.1079	0.0909	0.2141	0.5842	0.0038	-0.0741	0.1957	-0.0612	0.0901	0.7371	-0.6842	0.3838	0.6389	-0.2084	-0.0528	-0.2484	0.0681	-0.3024	0.276	-0.2123	-0.6197	0.5761	0.5865	-0.7577	-0.3314	0.5469	-0.1101	0.4029	-0.4685	0.1916	0.438	0.2163	0.1718
111141	-0.702	-0.6838	-0.2734	0.203	-0.0352	-0.5579	-0.2095	-0.4244	-0.6233	-0.57	-0.0043	0.1552	-0.2891	0.2898	0.0719	-0.352	0.2016	-0.0867	0.472	-0.1072	-0.4594	0.1336	0.0212	0.0916	-0.0681	0.0403	0.0674	0.3963	0.8958	-0.3775	0.1896	0.007	0.5393	0.3317	0.3829	-0.0983	0.4146	0.1481	0.2082	-0.3171	-0.0128	-0.0433	-0.2527	0.2405	-0.8884	-0.569	0.2739	0.076	0.4984
111149	-0.5647	-0.4076	-0.4672	0.0948	-0.224	0.1079	-0.2574	0.426	0.123	0.3773	0.004	-0.0694	-0.1364	-0.2786	-0.1258	-0.3698	0.0006	0.1305	0.3417	0.1254	-0.3817	-0.2608	-0.3486	-0.0678	-0.2551	-0.0057	-0.2965	0.1381	0.1334	-0.2569	-0.1363	-0.092	-0.0915	-0.2153	0.2385	-0.1488	0.0831	0.322	0.3463	-0.187	-0.1302	0.3034	-0.1411	0.1761	-0.4177	-0.184	-0.1717	-0.2097	0.0832
111161	-0.2442	0.0175	0.4119	-0.2705	-0.0562	-0.3829	-0.1721	-0.084	-0.0743	-0.372	-0.0739	-0.4062	0.0345	0.0857	0.0147	-0.2181	-0.2367	0.014	-0.1022	0.0582	0.2043	0.0245	0.0466	0.0706	0.0753	0.0913	0.0858	-0.1653	-0.4925	0.4763	0.1363	0.2591	-0.1618	-0.0239	0.0888	0.0806	-0.4984	-0.3907	-0.6242	0.5343	0.1983	-0.403	0.0308	-0.2889	-0.1166	-0.2599	0.1766	-0.3114	-0.2816
111164	-0.538	0.6134	0.1762	0.46	0.0297	-0.0344	-0.1709	-0.3769	0.0377	-0.5309	0.2322	0.2852	-0.0364	-0.18	-0.4423	0.0942	0.146	-0.0116	-0.54	0.1196	0.5414	-0.3659	-0.1559	-0.2083	-0.4562	-0.078	0.2534	0.1234	0.4116	-0.0303	-0.4828	-0.4912	-0.642	0.8377	0.1021	0.1711	-0.0631	-0.1593	-0.4304	-0.6293	0.3508	-0.3748	-0.0909	-0.5021	-0.2336	-0.5197	-0.2329	0.1535	0.1091
111166	-0.0476	0.2593	-0.0094	-0.3114	-0.157	0.134	0.0202	0.0069	0.1025	0.2824	-0.5339	-0.1026	-0.1557	-0.2695	0.6515	0.0991	0.1047	-0.5719	-0.306	-0.0014	-0.063	0.0006	-0.147	0.0819	-0.1983	-0.281	-0.3276	0.4363	0.9953	0.1759	0.4645	-0.0294	0.3118	-0.1879	-0.1295	0.7227	-0.302	0.2102	0.0576	-0.0813	-0.0088	-0.251	-0.2354	0.0192	-0.1678	-0.0821	-0.4181	-0.2875	0.5964
111179	-0.0016	0.0545	-0.1128	0.0005	-0.1713	0.3417	0.1084	-0.256	-0.1495	-0.0432	0.1204	0.2761	0.0234	0.0036	-0.1564	-0.1655	0.0035	-0.3847	-0.1584	-0.1943	-0.335	0.3235	-0.1627	0.1255	-0.0867	0.0905	0.2181	0.4294	0.9217	0.1391	0.1796	0.0306	0.2475	0.1111	-0.1268	0.315	0.0059	0.8219	0.251	0.0884	-0.2672	0.3139	-0.1815	0.2783	0.0692	0.2641	-0.0402	-0.0234	0.4056
111202	-0.2013	-0.2141	-0.4502	0.0615	0.1599	0.0995	0.2315	0.1518	0.1018	0.1735	0.2733	0.0809	0.0192	-0.0505	0.4919	-0.0336	0.1201	0.3676	0.384	0.1007	0.007	0.2522	-0.0619	0.0096	0.0871	0.1656	0.3017	0.2397	0.5381	0.0224	-0.3734	0.1357	-0.1253	-0.0939	0.1255	-0.2422	0.1844	0.8451	0.1609	0.2259	-0.4922	0.0864	-0.0136	0.427	-0.1955	0.5691	0.1562	0.1772	0.5108
111216	-0.3952	-0.5177	-0.6482	-0.0477	-0.3941	0.3684	0.009	0.4836	-0.0471	0.6582	0.0022	-0.0124	-0.1818	-0.2484	0.0728	-0.398	0.2693	-0.3323	0.4541	0.2833	-0.4832	-0.1767	-0.3852	0.0019	-0.34	0.2142	-0.2931	0.3427	0.3478	-0.2581	-0.2012	-0.2259	0.0282	-0.3445	0.1496	-0.3104	0.2541	0.4661	0.563	-0.2914	-0.4652	0.6431	-0.3518	0.1701	-0.5112	-0.1251	0.0488	-0.3962	0.2701
111239	0.0112	-0.239	-0.4942	0.056	0.2943	0.3214	0.184	0.1876	0.1532	0.0525	0.4874	0.1709	0.1062	-0.0064	-0.0514	-0.1686	-0.3977	0.2443	0.1571	-0.0676	0.1386	0.1841	0.2304	-0.0142	0.2742	0.2888	0.2664	0.1578	-0.1468	-0.2154	0.0676	0.1016	-0.0441	-0.0053	0.1829	-0.272	0.1755	0.6152	0.0412	0.1242	-0.3604	0.2512	0.2447	0.3707	0.1063	0.0753	0.1346	0.1191	-0.0047
111253	0.5016	0.3633	0.3772	-0.3236	-0.0338	0.105	-0.2291	0.0504	0.1187	0.0501	0.1219	0.2871	0.2043	-0.4954	0.1188	0.1493	0.1091	0.092	-0.2445	-0.4065	0.0618	-0.0544	-0.158	-0.0887	-0.3003	-0.6203	-0.2786	-0.0257	-0.1602	-0.0045	-0.3744	-0.2894	0.1011	-0.2921	-0.062	0.1354	-0.0939	-0.9046	-1.0323	-0.2	0.4323	-0.8588	0.0618	0.2222	0.3078	-0.11	-0.4601	-0.2036	0.0835
111278	0.3048	0.0534	-0.4636	-0.1384	0.1287	0.3217	0.2219	0.4472	0.1918	0.4462	0.16	0.1067	0.1004	0.0044	0.2174	-0.0594	-0.2772	0.0016	0.5489	0.2856	0.0188	-0.2638	0.0859	-0.0859	0.1761	0.3319	0.1683	0.44	-0.2852	-0.1616	-0.5676	0.001	-0.0738	-0.5118	-0.5069	0.1595	0.6188	0.3552	0.3626	0.1164	-0.2746	0.4367	0.2149	0.5033	-0.0213	0.7822	0.1905	0.059	0.2677
111298	0.1385	-0.287	-0.1421	-0.1274	-0.0719	0.2723	0.3082	0.1862	0.0916	0.3704	-0.0183	-0.0959	0.0965	0.1592	0.2422	-0.0548	0.0791	0.316	0.2008	0.2991	0.0574	-0.0528	0.1053	0.0233	0.1536	0.3527	0.0358	0.2188	0.247	-0.3269	0.1552	0.062	-0.2636	-0.1467	0.0397	-0.4495	-0.0965	0.6399	0.2365	-0.0151	-0.1476	0.6789	0.1801	0.3207	0.1273	0.535	0.0873	0.0609	-0.2018
111318	0.1004	-0.113	-0.4221	-0.1056	-0.0778	0.4216	0.108	0.3329	0.4463	0.3608	-0.1228	0.1414	-0.16	0.0954	-0.2098	-0.2004	-0.2141	0.0792	-0.0308	0.126	-0.2295	-0.107	-0.2457	-0.1398	0.0193	0.1918	-0.1018	0.3947	-0.0882	-0.3956	-0.0636	-0.2306	-0.1811	-0.3615	-0.1143	-0.0585	0.1126	0.1085	0.4181	-0.1694	-0.3126	0.2487	0.0274	0.2203	0.2127	0.2744	-0.1276	-0.2316	0.282
111335	-0.0251	-0.5072	0.2387	0.0891	-0.0176	-0.51	0.17	-0.0127	-0.5126	-0.097	0.0466	-0.5613	0.613	0.3525	0.4777	-0.1538	-0.2264	-0.0274	-0.0699	-0.61	0.1664	-0.1429	0.0344	0.2601	0.1595	0.0618	0.0034	-0.7517	-0.5409	0.0611	0.1199	0.1963	-0.5143	-0.1644	-0.2361	-0.2048	-0.39	-0.5393	-0.409	0.3504	0.155	-0.3562	0.1358	-0.1253	0.0842	0.2151	0.099	-0.395	-0.5907
111342	0.1352	0.1476	0.2952	0.0406	-0.2071	-0.5579	-0.0761	-0.6598	-0.2698	-0.2976	-0.1105	-0.3755	0.1325	0.1056	-0.0728	-0.1036	0.0056	-0.1017	-0.0878	-0.1641	0.0759	0.013	-0.1055	0.0561	0.0999	-0.214	-0.1002	0.4766	-0.2095	0.2586	0.3307	0.1836	-0.2938	-0.0398	0.2109	0.3346	-0.4771	-0.3359	-0.0572	0.1797	0.456	-0.1314	0.0488	-0.2641	-0.1007	-0.4887	0.0231	0.0542	-0.3296
111349	0.0151	-0.0624	-0.4261	0.1664	0.1091	0.4177	0.0686	0.9944	0.5135	0.9847	-0.0647	0.0678	0.2061	-0.279	-0.0047	-0.3914	-0.0163	0.184	0.415	0.4095	-0.2373	-0.3838	-0.239	-0.1717	-0.2261	0.1013	-0.3558	0.1214	-0.5558	-0.5365	0.0082	-0.5247	-0.1602	-0.4863	0.0541	-0.1885	0.3817	0.0398	0.7002	-0.2389	-0.4252	0.4177	0.0932	0.4025	-0.1906	-0.0718	0.1523	0.1448	0.0237
111356	0.9731	0.2551	0.0367	-0.5646	0.2264	0.637	0.0826	0.3571	0.5368	0.4933	-0.6672	-0.4379	-0.0635	0.2338	-0.1504	0.5842	0.7555	-0.2382	-0.1168	-0.1936	0.2096	0.053	0.3853	0.1048	0.6165	0.5246	0.2835	-0.0971	0.7305	0.1645	0.1549	0.152	-0.0648	0.3583	-0.1475	-0.2606	-0.0932	0.7455	0.1025	-0.2422	0.0192	0.1256	-0.051	0.3299	0.7002	0.3662	0.3677	-0.2659	0.06
111362	0.1236	-0.2121	-0.3307	-0.1004	-0.288	0.2189	0.0289	-0.2384	0.345	-0.1974	0.3006	0.0171	-0.2342	-0.0737	0.1118	-0.0763	-0.1201	-0.6422	-0.0345	0.0168	-0.4639	0.1216	-0.0114	0.1189	0.0276	0.201	-0.025	-0.2102	0.1487	0.0506	0.3129	0.2446	0.6292	0.0655	0.0046	0.3377	0.3756	0.0209	-0.1125	-0.3037	-0.1591	0.1286	0.2238	0.1783	-0.1084	0.1031	-0.0083	-0.3664	0.4064
111373	-0.2917	-0.1663	-0.2896	-0.0078	-0.071	0.3604	0.0843	0.2003	0.1137	0.0197	-0.1331	-0.0275	-0.1507	-0.1271	-0.2432	-0.1677	-0.1479	0.0472	0.0638	0.1254	-0.3112	-0.0202	-0.1052	-0.0187	-0.274	0.189	-0.1329	0.203	0.3385	-0.344	-0.0099	0.1551	0.1648	0.0191	0.1828	-0.134	0.1474	0.413	0.3069	-0.0376	-0.329	0.1585	-0.0082	0.1871	0.0076	0.2882	0.1032	-0.186	0.2045
111374	0.0263	-0.441	-0.0617	-0.5472	-0.1767	0.2144	-0.065	-0.0519	-0.0282	-0.1399	0.2193	0.103	-0.0445	0.067	-0.165	0.0783	-0.0109	-0.4028	-0.3775	-0.1748	-0.1138	0.5136	0.4152	0.3955	-0.1478	-0.0248	0.1004	0.2672	1.1963	0.3134	0.551	0.1737	0.1439	0.1733	-0.385	0.8183	-0.2509	0.6801	0.0052	0.1164	-0.2976	0.3649	0.1759	0.1758	0.5952	0.0063	-0.4236	0.1591	0.3779
111378	-1.0493	0.3945	0.2775	0.1642	1.0177	-1.6722	1.2248	-0.737	1.5057	-1.9234	0.3881	1.506	-0.3213	0.3702	0.0341	0.8825	-0.6085	-0.2049	-1.024	0.7843	0.5108	1.4691	0.0495	-0.5279	1.0478	0.3792	1.5908	0.489	0.6907	0.4622	-0.8203	0.4093	1.5976	1.2686	0.4698	1.4018	-0.6071	0.7161	0.9824	0.2472	0.2272	1.3692	1.6419	0.0757	1.2038	1.3836	0.9192	0.3584	1.1218
111405	-0.0988	-0.1734	-1.1921	0.0033	0.3287	-0.0254	-0.1587	2.7846	0.8756	2.0264	-0.3663	-0.1924	0.3191	-0.1899	0.6073	-0.4228	0.0015	1.0209	1.0944	1.3776	-0.0423	-0.793	0.2995	-0.3264	-0.676	0.3987	-0.9448	0.4923	-0.0164	-1.1036	-0.202	-0.9124	-0.7312	-0.6546	0.0253	-0.5077	0.9073	0.3828	0.5963	-0.2944	-0.3566	0.6718	0.8156	0.5893	-0.6731	-0.4911	0.2761	-0.1165	-0.2619
111408	0.0441	-0.0961	-0.113	0.1491	0.1318	0.1795	0.1714	-0.0239	-0.6741	0.2996	0.1044	0.1287	-0.1926	-0.1058	-0.0332	-0.1523	-0.1456	-0.2543	0.3044	-0.8369	-0.0701	0.0658	-0.332	-0.0451	-0.2024	0.0546	0.3688	0.4095	0.7381	-0.1826	-0.0374	0.1492	0.1039	0.0111	-0.1839	0.1202	-0.9979	0.2601	0.2362	0.3492	-0.5202	0.6599	-0.1507	0.6049	-0.0487	0.286	0.0131	-0.1906	0.6342
111409	-0.3419	-0.6112	-0.6129	0.0813	-0.0326	0.8353	0.285	0.9407	0.4032	0.688	0.053	-0.0914	-0.4917	-0.2345	0.1719	-0.6786	-0.1745	0.1225	0.5979	0.0663	-0.3894	-0.3342	-0.4968	-0.3797	-0.4976	-0.0046	-0.4807	0.1171	-0.7709	-0.3649	-0.3162	-0.2861	-0.2196	-0.6464	0.2422	-0.2558	0.6977	0.0789	0.6528	-0.4238	-0.4045	0.5208	0.0413	0.2449	-0.7239	0.1452	0.041	-0.5194	0.5659
111424	-0.2768	-0.0207	0.2505	0.1248	-0.0789	-0.1682	-0.1369	-0.1776	-0.0284	-0.1296	0.2766	0.05	0.0165	-0.0374	0.0192	-0.1432	-0.3008	0.0962	0.1741	-0.2599	0.0904	0.0523	-0.4034	-0.0399	-0.316	-0.2238	-0.1013	-0.0479	-0.6019	0.3251	-0.1469	0.0854	-0.043	0.0778	0.2815	0.1523	-0.1351	0.2648	-0.1575	0.0871	0.0331	-0.1607	0.1015	-0.0539	-0.3717	-0.0107	0.009	0.0127	0.0695
111432	-0.1829	0.5977	0.7842	0.1199	0.1148	-0.9014	-0.3848	-0.4897	-0.2893	-0.6632	-0.0053	-0.2408	0.1174	0.0211	-0.1296	0.1711	0.1301	0.1009	-0.381	-0.1064	0.2281	0.0742	-0.0149	-0.0395	0.0011	-0.974	-0.086	-0.4436	-0.3348	0.6475	-0.1209	0.1565	-0.1296	0.2863	0.3937	0.4321	-0.3583	-1.028	-0.5962	0.0693	0.6578	-0.7564	-0.1878	-0.5337	0.1944	-0.9234	-0.2594	0.3741	-0.7466
111458	-0.1613	0.3302	0.3536	0.2561	-0.1013	-0.544	-0.2338	-0.0676	-0.1437	-0.2169	0.1075	-0.0523	0.1196	-0.0956	-0.1204	0.0337	0.2195	0.0654	-0.2462	-0.2701	-0.0472	-0.1931	-0.3233	-0.2739	-0.0746	-0.7657	-0.1349	-0.1074	-0.4095	0.3098	-0.2659	-0.153	-0.2245	0.2346	0.4197	0.2506	-0.3241	-0.7672	-0.1184	0.0274	0.3299	-0.2977	-0.3727	-0.4809	-0.1213	-0.632	-0.2641	0.1306	-0.5066
111473	0.2932	-0.3487	-0.0352	-0.3893	-0.7838	-0.6437	0.2139	-0.4215	-0.2443	0.2429	0.0783	-0.193	-0.5465	-0.2273	0.3138	-0.1115	-0.4632	-0.702	-0.2306	0.6306	-0.0366	0.1065	0.3513	0.6431	-0.148	0.3969	-0.4764	-0.4631	0.2139	-0.1358	-0.073	-0.1187	-0.0296	0.0525	-1.0098	0.1027	-0.1508	0.2098	-0.4035	0.0902	0.5605	-0.1564	0.4269	0.3462	0.0167	0.8812	-0.1061	-0.3322	0.993
111487	-0.5085	0.437	-0.8401	-0.2513	0.2261	0.0813	0.6035	0.2487	0.3863	0.2727	0.0524	0.1681	0.0065	-0.0087	0.2587	-0.2671	-0.3414	0.3414	0.2257	-0.1698	0.0411	0.5167	-0.1396	0.018	-0.3111	0.1315	0.2973	0.3641	-0.0431	-0.1118	0.0955	0.4062	-0.1346	-0.1394	-0.1486	-0.0085	0.2029	0.4945	0.1852	0.354	0.0375	0.3054	0.0969	0.678	-0.3172	0.4874	0.3043	-0.1602	0.0089
111490	-0.2118	0.3086	0.384	0.2887	-0.0295	-0.6022	-0.2493	-0.4636	-0.1865	-0.6513	0.2075	0.0173	-0.0069	-0.0465	-0.0727	0.1744	0.0624	-0.0412	-0.2999	-0.3801	0.1514	0.0158	-0.0697	-0.258	-0.048	-0.5252	0.0674	-0.4345	-0.2689	0.3956	-0.1613	0.1342	-0.1984	0.3833	0.2222	0.2627	-0.244	-0.657	-0.5733	-0.013	0.3883	-0.695	0.0227	-0.4329	0.0703	-0.6133	0.0101	0.2274	-0.395
111497	0.1722	-0.5251	-0.6339	0.3435	0.2001	-0.1919	0.3999	0.1793	-0.37	0.6895	0.0727	-0.3409	-0.0645	0.099	0.8056	0.0287	-0.1509	0.034	0.2151	0.3367	0.0253	-0.048	0.0206	-0.1359	0.3612	0.1889	-0.1092	-0.4034	0.4023	-0.4276	-0.0886	-0.1678	-0.2451	-0.4291	-0.1916	-0.1342	0.3888	0.1188	0.268	0.0689	0.0096	0.4807	-0.0129	-0.1005	-0.3173	0.2461	0.2644	-0.206	-0.0618
111499	-0.173	-0.0325	-0.5952	0.2838	-0.2006	0.2934	-0.3401	-0.3633	0.1968	0.2122	-0.3506	0.3113	0.1111	-0.4354	-0.002	0.1493	-0.1087	0.0561	-0.2921	0.1881	-0.6797	-0.2017	-0.3704	0.2435	-0.5438	0.1626	-0.3558	0.1804	0.3232	-0.7494	-0.7294	-0.3053	0.601	-0.2168	0.3952	-0.4063	0.0249	0.4184	0.4047	-0.4806	0.1741	0.4615	-0.2775	-0.2857	-0.121	0.1603	0.512	0.0975	-0.1843
111503	0.0065	-0.0359	0.7128	0.0858	0.0801	-0.7486	-0.2022	-0.6805	-0.413	-0.8434	0.1421	-0.4817	0.2553	0.4621	0.0385	0.1963	-0.0439	-0.0892	-0.59	-0.172	0.2188	0.2122	0.2647	0.3218	0.2301	-0.3616	0.1402	-0.6245	-0.0513	0.5071	0.0918	0.3532	0.0764	0.1611	0.1507	0.1772	-0.4907	-0.4834	-0.579	0.6655	0.341	-0.5785	0.2131	-0.5288	0.2894	-0.4821	0.0754	-0.1071	-0.7304
111518	-0.5444	-0.1367	-0.5373	0.0754	-0.3054	0.4282	-0.1928	-0.6485	-0.6797	-0.1954	0.1346	-0.0067	-0.2653	0.1511	0.0668	-0.0891	-0.1143	-0.367	-0.2864	1.4324	-0.8026	-0.2254	-0.4696	0.0751	-0.0136	0.0963	0.0001	-0.1728	-0.6026	-0.0719	0.2964	0.0507	0.2436	0.1236	0.2897	-0.03	-0.3581	0.1962	0.3321	-0.3828	-0.2226	0.1563	-0.1698	-0.4137	-0.4759	-0.0125	0.3732	-0.2728	0.2494
111527	-0.0114	-0.2704	-0.2298	-0.1129	-0.4259	0.53	0.287	0.0631	0.2696	0.3411	0.3251	0.1382	0.0524	0.008	-0.1297	-0.427	-0.2082	-0.3955	0.0118	-0.5847	0.2586	0.058	0.3413	0.2076	0.106	0.36	0.6048	0.4551	0.6852	-0.0743	0.1793	0.036	0.1215	0.4455	-0.1652	0.2647	0.0614	0.6782	0.0063	-0.6551	-0.3641	0.596	-0.4631	0.1699	0.2619	-0.1286	0.1512	0.1184	0.5965
111534	-0.2788	0.7474	0.652	0.1694	0.1599	-1.1518	-0.1349	-0.2954	-0.2037	-0.8711	0.1944	-0.0697	0.3053	0.0025	-0.0603	0.1423	-0.1186	0.2003	-0.3237	-0.2989	0.356	-0.096	-0.0858	-0.3041	-0.065	-0.9032	0.0884	-0.4475	-0.553	0.7383	-0.2327	0.0686	0.0249	0.3113	0.473	0.2649	-0.3062	-1.2704	-0.946	0.1807	0.7409	-0.8328	-0.1246	-0.5332	0.1365	-0.8506	-0.2324	0.3622	-0.9185
111538	0.0984	0.3693	-0.1155	-0.0247	-0.2452	0.2283	0.2474	0.1765	0.1451	0.2139	-0.1589	-0.1333	-0.1503	-0.0675	0.1188	-0.2189	0.35	-0.3829	0.18	-0.0753	0.14	-0.0592	0.1221	0.0636	0.0431	0.2651	-0.0712	0.1934	0.2227	-0.2665	0.2428	-0.0767	0.2385	-0.2488	-0.113	-0.2759	0.2762	-0.0304	0.3792	-0.1812	-0.3159	0.2945	-0.0944	0.1939	0.0421	0.3313	0.1694	0.0259	0.2979
111542	-0.2183	0.5307	0.1226	-0.1074	0.0685	0.0535	0.1666	-0.0584	0.2885	0.0476	-0.7967	0.5587	-0.2895	0.1106	-0.4598	0.3091	0.1596	-0.9596	-0.0371	0.1044	-0.5962	0.4179	-0.053	-0.2097	0.1414	-0.1157	0.1782	0.5153	1.0224	-0.2167	0.1169	-0.0355	0.2254	0.0973	-0.4359	0.5091	-0.0865	0.4486	0.1435	-0.0201	-0.0072	0.0458	0.3094	-1.0362	0.113	0.3754	-0.2774	0.2137	-0.4745
111545	-0.4503	0.5086	0.0649	0.1878	0.295	-0.0572	0.1918	-0.384	0.4091	-0.122	0.1155	0.5208	0.1123	-0.0398	-0.0852	0.1192	-0.3527	0.0587	-0.3827	-0.4106	0.0359	0.04	-0.1837	-0.632	-0.1953	-0.349	0.0843	0.5375	0.3873	0.2808	-0.4626	0.7302	0.1131	0.1917	-0.1226	0.4972	-0.365	0.4186	0.4679	0.2866	0.1876	0.4789	0.2182	-0.3418	-0.0733	0.3493	-0.2097	0.2855	0.0156
111550	-0.4765	-0.3025	-0.0759	0.1589	-0.5654	0.0033	-0.2605	0.369	0.7067	0.4454	-0.1655	0.0982	0.393	-0.2596	-0.5341	-0.5242	-0.1402	0.0658	0.0133	0.2122	-0.2341	-0.0816	-0.4459	-0.0855	-0.2339	-0.0013	-0.3153	0.2904	0.1386	-0.3362	0.3586	0.0245	0.0817	-0.6744	0.1355	-0.5391	0.5689	-0.335	0.941	-0.028	0.0801	0.0526	-0.0222	-0.5196	-0.378	-0.3874	0.4622	-0.1773	-0.05
111556	0.4057	-0.3844	-0.5961	0.1273	0.3993	0.262	0.7492	0.9789	-0.009	1.1616	-0.002	-0.144	-0.0603	-0.1033	0.9036	0.1986	0.2433	0.2063	0.7587	0.2977	0.231	-0.3222	-0.017	-0.3747	0.555	0.5974	-0.0654	0.2975	-0.0176	-0.2464	-0.1814	-0.2609	-0.3007	-0.3745	-0.032	-0.7639	0.424	0.1068	0.5618	-0.3162	-0.2941	0.8081	0.177	0.4946	-0.2496	0.6564	0.1841	-0.0064	-0.0447
111573	-0.2595	-0.2036	-0.3854	-0.0062	-0.2525	0.2389	0.0816	0.2016	0.0768	0.3711	0.2133	0.2217	0.0288	-0.1107	-0.0322	-0.3485	-0.1026	-0.1861	0.1888	-0.0239	-0.2961	0.1729	-0.217	-0.0307	-0.293	0.2016	-0.0586	0.487	0.4555	-0.1413	0.0366	0.1134	0.1452	-0.1793	0.0894	0.0842	0.076	0.4259	0.3681	0.0289	-0.4579	0.3224	-0.1618	0.3727	-0.0594	0.1378	0.0679	-0.1251	0.411
111587	-0.4112	1.0345	0.9097	0.3588	-0.0547	-1.1481	-0.3181	-0.4625	-0.4275	-0.804	0.243	-0.3113	0.367	-0.1726	-0.3435	0.2945	-0.142	0.5127	-0.3341	-0.5472	0.1941	-0.0264	-0.2965	-0.3467	0.0806	-1.4838	0.1056	-0.6451	-1.2141	1.0768	-0.4688	0.2567	-0.1874	0.4132	0.5908	0.5229	-0.5429	-1.0942	-0.9458	0.3747	0.8123	-0.9549	-0.2352	-1.1087	0.0324	-1.0853	-0.597	0.3262	-0.9992
111605	-0.0528	-0.315	-0.3762	0.0651	0.0643	0.2252	0.5723	0.5449	0.257	0.1638	0.3152	0.0259	0.2417	0.1331	0.1123	0.0472	0.2228	0.2625	-0.3013	0.1097	0.1308	0.2419	0.097	0.064	0.1034	0.4501	0.3538	-0.8069	0.1939	-0.1782	0.1237	0.3911	0.3133	-0.0838	-0.0422	-0.1153	-0.0437	-0.8073	0.2734	0.3727	-0.4425	-0.7376	-0.1004	0.0425	0.1945	0.6174	0.1536	0.2541	0.1736
111617	-0.3401	0.9432	1.078	0.1763	0.0432	-1.0772	-0.2902	-0.5375	-0.6428	-1.2458	0.2055	-0.4769	0.5205	0.1256	-0.3107	0.3341	-0.1248	0.6238	-0.6308	-0.9402	0.2928	0.0167	0.2036	-0.1516	0.1991	-1.5961	0.1877	-1.0449	-2.7165	0.9706	-0.2766	0.2876	-0.0465	0.2557	0.6175	0.4048	-0.3683	-2.494	-1.1169	0.3179	0.8864	-1.5341	-0.2824	-0.5738	0.3823	-1.0604	-0.5416	0.3681	-1.349
111671	-0.1646	0.4597	0.2321	0.2054	-0.3363	0.0921	-0.243	0.0175	-0.0902	-0.6378	0.3203	0.4294	-0.5066	-0.4386	-0.395	0.0297	0.2473	-0.0747	-0.1895	0.7645	0.0191	0.1301	-0.2332	-0.2318	-0.3802	-0.7222	-0.0757	0.0255	-0.3124	0.437	-0.1568	0.3085	0.3928	0.0684	0.2352	0.4078	0.364	-0.0544	-0.7986	-0.3031	0.202	-0.0921	-0.2231	-0.3359	0.1807	-0.2982	-0.5206	0.1356	-0.0821
111685	0.6523	-0.2062	-0.3486	-0.1063	0.1474	0.369	0.4472	0.2901	-0.0824	0.1614	-0.0203	-0.3167	-0.0615	0.16	0.5527	-0.0499	-0.1967	0.4812	0.3648	0.0184	0.3366	0.0359	0.3464	0.1528	0.5177	0.5809	0.2498	0.1041	-0.1154	-0.3429	0.1951	0.1179	-0.1722	-0.4427	-0.3019	-0.3045	0.1824	0.4624	-0.1035	-0.1342	-0.1533	0.2358	0.2975	0.4177	0.4222	0.5385	0.1178	-0.2055	-0.3222
111702	-0.396	0.5224	0.643	0.2252	0.1441	-0.5012	-0.2839	-0.3223	-0.4023	-0.5834	0.1197	-0.1065	0.2046	-0.2986	-0.2978	0.0014	0.0141	0.33	0.0803	-0.4237	0.1184	-0.0617	-0.301	-0.1388	-0.0414	-0.6096	0.0507	-0.2784	-0.136	0.7881	-0.4255	0.1528	0.1804	0.3172	0.5432	0.2749	-0.4054	-0.2284	-0.3904	-0.0467	0.5218	-0.3609	-0.2142	-0.5191	-0.0644	-0.5337	-0.2087	0.1205	-0.4134
111712	0.4491	-0.1024	-0.0364	-0.0535	0.2378	0.3257	0.3699	0.3308	0.2462	0.4696	-0.1949	0.1183	0.0117	0.0929	0.3901	-0.0398	0.0605	-0.0744	0.153	-0.108	-0.0469	0.1832	0.0235	-0.0479	0.1947	0.3898	0.0534	0.1857	0.3068	-0.3006	0.1775	-0.1506	-0.1562	-0.1993	-0.2314	-0.0299	0.2184	0.4168	0.2877	-0.1137	-0.3768	0.2328	0.0459	0.2782	0.0344	0.4404	0.1632	0.0493	0.275
111749	-0.0121	0.5632	0.1784	0.3466	0.2043	-0.3612	-0.0008	0.2825	0.1801	-0.156	0.3599	0.4381	0.2042	0.0275	-0.3211	0.2831	-0.2777	0.6601	-0.1538	-0.0693	0.242	-0.1926	-0.3577	-0.3254	-0.4308	-0.7096	-0.4769	-0.244	-0.6881	0.0002	-0.2317	-0.4253	-0.2353	-0.0808	-0.04	-0.0197	0.1241	-0.5013	-0.5501	-0.1679	0.5053	-0.2455	0.1415	-0.7892	0.4536	-0.4927	-0.7123	0.0727	-0.2
111800	-0.5286	0.1773	0.4593	0.2454	0.1076	-0.5765	-0.1074	-0.385	-0.3508	-0.5942	0.1368	-0.4097	-0.0426	-0.0626	0.115	0.0035	0.1965	-0.1008	-0.0773	-0.3115	0.0665	-0.2122	-0.1329	-0.1199	-0.2008	-0.1189	-0.1193	-0.2347	0.3638	0.5648	0.1741	0.142	0.0428	0.1889	0.0416	0.2664	-0.0564	-0.0281	-0.4872	-0.0328	0.1824	-0.1383	-0.0942	-0.0972	-0.3471	-0.4975	0.2948	0.1117	-0.2943
111806	0.0805	0.2513	0.4856	0.1053	-0.2031	-0.2866	0.1778	-0.3285	-0.0933	-0.3169	0.2282	-0.0641	-0.0409	0.1657	0.6174	0.6425	0.0985	0.0569	-0.619	0.318	-0.0482	0.058	-0.0565	0.2254	-0.217	-0.0482	0.0707	0.2148	0.1946	0.313	0.5722	0.2362	-0.5999	0.2133	0.1053	-0.1867	-0.1012	-0.7098	0.0085	-0.0325	0.2905	-0.6405	0.1083	0.2489	-0.5764	-0.2197	0.0555	0.1352	0.5214
111812	0.1761	-0.2132	-0.2175	-0.1206	0.0194	-0.0722	0.135	-0.103	-0.2974	-0.0784	0.0947	-0.0155	-0.1985	0.1042	0.0407	-0.1601	-0.1002	-0.3242	0.0948	0.231	-0.2412	0.17	0.0147	0.3901	-0.0631	0.3181	0.0839	0.0492	-0.0222	-0.0758	-0.0539	0.0512	0.0223	0.044	0.0169	-0.0786	-0.203	0.2453	0.3841	-0.1573	-0.0503	0.3294	0.004	0.0206	0.3086	0.3074	0.1831	-0.0541	0.1539
111826	-0.0449	-0.1327	-0.6938	0.0636	0.1093	0.6399	-0.0275	0.6257	0.526	0.5739	0.011	0.2357	0.0353	-0.0871	-0.3025	-0.4204	0.0567	0.1706	0	0.0508	-0.2218	-0.2108	-0.1682	-0.3654	-0.218	0.3012	-0.349	0.5437	-1.0728	-0.6006	-0.0108	-1.6566	-0.1775	-0.2529	-0.048	-0.149	0.3383	0.0682	0.6643	-0.0086	-0.6308	0.4982	0.1066	0.4147	-0.0437	0.1675	0.0208	0.0318	0.0537
111836	0.413	-0.1108	-1.0099	0.077	0.6142	0.522	0.9672	1.1894	0.0528	0.9118	0.0541	0.2117	0.3739	-0.1568	0.559	0.3386	0.4494	0.4171	1.0506	0.7484	0.3482	-0.0857	0.3061	-0.1378	0.7255	0.9352	0.8048	0.3911	0.2017	-0.4713	-0.3254	-0.2477	-0.3679	-0.0089	0.114	-1.2858	0.8462	0.8175	0.6385	-0.2328	-0.5927	0.7189	0.0928	0.4375	-0.5345	0.7242	0.6729	0.1169	-0.0749
111838	-0.2179	-0.2736	0.3546	-0.2339	-0.2385	0.1334	-0.1028	-0.3552	-0.2625	-0.3589	-0.0268	0.3425	-0.1348	0.1083	0.0102	-0.0047	-0.0875	-0.2826	-0.1538	-0.1072	0.0142	0.198	0.1173	0.373	0.003	0.0379	0.319	0.2179	0.4223	0.3985	0.2002	0.3311	-0.1516	0.1264	-0.0384	0.4874	-0.4506	0.3163	-0.155	0.1146	0.1512	-0.1166	0.0079	0.3754	0.167	0.247	-0.031	-0.0148	0.4001
111840	-0.649	-0.7485	-1.0064	-0.3479	0.217	-0.527	0.628	-0.1466	-1.0913	-0.5547	-0.1835	0.7679	-1.0794	0.3536	0.4343	-0.5313	0.1962	-0.648	0.4466	-0.844	0.7871	-0.8553	-1.5354	-0.565	0.2528	0.0051	-0.2705	-0.3173	-1.0843	0.83	-1.1933	0.1951	0.7301	-0.7265	1.3856	-0.8848	-0.0013	1.3893	-0.1962	-0.1368	-0.6471	0.5584	0.1857	0.0823	-0.6467	2.6092	0.3477	-1.3697	0.488
111844	0.5504	0.2863	0.0183	-0.2843	0.0601	0.1594	-0.0222	0.0978	0.563	0.4856	-0.6076	-0.0715	-0.4111	-0.1101	0.0286	0.1766	-0.2815	-0.1388	-0.5457	-0.3342	-0.4246	-0.259	-0.2613	0.3269	-0.0285	-0.0543	-0.6594	0.0461	0.5874	-0.035	0.2121	-0.1667	0.2449	-0.2527	-0.6354	0.1543	0.3237	0.057	0.6656	0.1319	0.2384	-0.2873	-0.1857	-0.2332	0.0878	0.2145	-0.5439	-0.5281	0.4794
111851	-0.3245	-1.239	-0.0211	0.2871	-0.1636	-0.1272	1.2264	0.7434	-0.4584	0.8846	0.5334	-0.3489	1.6106	-0.522	-0.3781	-0.656	1.0669	0.1758	0.9539	0.091	-0.1891	0.697	1.0435	0.8386	-0.7672	1.2262	0.5315	0.32	1.1273	0.1611	1.2552	0.0448	-0.7367	-0.499	-0.4343	-0.1996	0.4361	0.6549	-0.0144	0.6514	-0.3235	0.7713	0.3692	1.132	-0.0545	0.3439	0.8853	0.3913	1.0045
111895	0.3251	0.1996	-0.4904	0.1637	-0.3275	0.2496	0.0367	0.2779	0.1763	0.3781	0.006	0.1218	0.1492	-0.2668	0.1521	-0.1065	-0.0315	-0.0146	0.1076	-0.0832	-0.406	-0.0889	-0.2873	-0.3227	-0.6386	0.4113	-0.0598	0.2145	0.0671	-0.3293	-0.0752	-0.2054	-0.2099	0.0922	0.0015	-0.1608	0.0131	0.5992	0.3783	-0.0404	-0.2622	0.3445	-0.1142	0.0331	-0.348	0.1972	0.1835	-0.067	0.0241
111899	-0.4264	-0.543	-0.3364	0.0934	-0.3192	0.5557	0.0585	0.1836	0.0432	0.3075	0.2077	0.2069	0.2812	-0.187	-0.3568	-0.3274	0.0193	0.0399	0.3203	0.0623	-0.2991	0.1719	-0.0613	-0.0058	-0.3036	0.1501	0.0442	0.1919	0.3359	-0.3296	0.0225	0.0061	-0.0154	-0.1327	0.1567	-0.2997	0.2258	0.4795	0.3507	-0.0178	-0.4786	0.1361	-0.0717	0.436	-0.0561	0.0545	0.0385	-0.1359	0.2516
111923	0.2573	-0.3021	-0.5594	-0.2548	0.2565	0.2209	-0.0733	0.7732	0.4384	0.8812	0.3377	-0.1998	0.3014	0.2218	0.1099	-0.1492	-0.273	0.6389	0.3849	0.6158	0.1378	-0.0712	0.2922	0.0164	0.1529	0.3984	-0.0539	0.2694	0.2474	-0.6662	0.2645	-0.0995	-0.2359	0.0432	0.2816	-0.3584	0.4985	0.4229	0.3724	-0.1072	-0.1717	0.2591	0.3766	0.3987	-0.0136	0.0345	0.054	-0.0238	-0.1267
111931	0.2445	-0.1853	-0.1245	-0.0942	0.1909	0.3825	0.4148	0.4708	-0.0871	0.097	0.3355	-0.2043	-0.0073	0.1201	0.4707	0.1147	-0.206	0.3551	0.5831	0.1146	0.1551	0.0925	0.3766	0.0534	0.4805	0.3729	0.2227	0.1108	-0.4654	0.0759	0.1953	0.1821	-0.1826	0.0464	-0.1974	-0.2862	-0.03	0.7053	-0.1354	0.1074	-0.0705	0.4045	0.1529	0.4684	-0.059	0.6871	0.351	0.1365	0.0917
111934	-0.0217	-0.187	-0.2535	0.0392	0.0234	0.5332	0.1162	-0.0101	0.3695	0.4128	0.2235	0.3442	-0.1584	0.1077	-0.2289	-0.3319	0.3723	0.2989	-0.0743	0.2735	-0.2025	0.1424	-0.1037	0.0498	-0.0494	0.1235	0.1231	0.4361	0.0506	0.2268	0.3158	0.1642	-0.1639	-0.118	0.2427	0.068	-0.5164	0.547	0.224	-0.0294	-0.661	0.1277	-0.1415	0.3597	-0.4029	-0.2165	-0.189	0.0319	0.5853
111951	-0.3164	-0.2245	-0.1042	0.2898	-0.1448	0.1889	0.0681	0.1932	-0.2831	0.1537	0.2331	-0.0725	0.1926	-0.1153	0.2311	-0.1309	-0.0469	-0.241	0.2021	-0.3274	-0.1693	0.1868	0.1306	0.0127	0.0119	0.0984	0.2074	0.0705	-0.3141	0.0854	0.1505	0.1259	0.2049	-0.1149	0.3437	0.0897	0.1045	0.0013	0.2576	0.2091	-0.3776	-0.0355	-0.151	0.1072	-0.2745	-0.0941	0.342	-0.1073	0.2313
111979	-0.0413	0.098	0.1185	-0.1757	-0.0475	0.0688	0.2246	-0.4357	0.0052	0.0807	-0.1173	-0.07	-0.0611	0.3	0.3636	-0.0826	0.2043	-0.2949	0.0756	0.2418	-0.0575	0.0872	0.2392	0.2775	0.3477	0.2024	0.134	0.3047	0.7045	-0.0355	-0.0505	0.1669	-0.0056	0.0365	-0.0958	-0.2026	-0.145	0.5048	0.2623	-0.1581	-0.4029	0.0024	-0.0977	0.3403	-0.4131	0.251	0.162	-0.1397	0.3413
111980	-0.101	0.2494	0.0786	0.3372	0.2856	-0.4713	0.0104	0.2259	0.097	-0.0172	-0.0115	-0.3484	0.0352	-0.1887	-0.5678	0.4433	-0.237	-0.1486	-0.3078	-0.056	-0.2604	0.2816	-0.2791	0.0727	-0.3857	0.4641	0.2089	0.2503	-0.1125	-0.0298	-0.0943	0.3613	0.0372	0.7386	0.391	-0.099	-0.5593	0.3295	-0.0132	0.2702	-0.3349	0.0189	-0.1421	0.2285	0.3597	0.1307	0.1725	-0.0508	0.5528
111987	0.459	-0.3607	-0.4722	-0.1219	0.1462	0.5381	0.4964	1.004	0.2592	0.9816	-0.0983	-0.0183	0.1343	-0.1856	0.0284	-0.0701	0.164	0.4001	0.7367	0.6614	0.069	-0.1537	0.057	-0.1463	-0.0497	0.4991	0.2866	0.6745	0.1647	-0.8256	-0.0944	-0.4181	-0.5825	-0.3914	-0.1622	-0.7379	0.1861	0.6829	0.8094	0.0867	-0.0043	0.736	0.3117	0.2599	0.267	0.2991	0.0009	-0.0295	-0.0004
112005	-0.342	0.5397	0.4722	0.1949	-0.8056	-0.4783	-0.3042	0.0618	0.0112	-1.0072	0.0512	0.0454	-0.1341	0.0306	-0.3273	0.0601	-0.2422	0.1495	-0.5678	-0.5419	0.1509	0.0239	-0.0269	-0.2674	-0.121	-0.4606	0.3503	-0.2544	-0.4197	0.2856	-0.1735	0.1294	-0.2622	0.2936	0.1395	0.223	-0.1854	-0.75	-0.0024	-0.0604	0.3058	-0.6517	-0.3072	-0.2052	0.1471	-0.4802	-0.1055	0.2968	-0.7568
112021	-0.1663	-0.1754	0.186	-0.2503	-0.3549	-0.6458	-0.2831	-0.7318	0.0418	-0.3442	-0.2488	0.037	-0.2311	0.0343	-0.0338	0.0651	-0.0149	-0.1212	-0.7403	-0.6416	0.0263	0.182	-0.5194	0.4417	-0.1328	-0.4427	-0.0981	-0.4749	-0.5724	0.0975	0.1871	-0.4762	-0.1463	-0.0374	-0.0229	0.2194	-0.5606	-0.0167	-0.5732	0.0817	0.2277	-0.0519	0.1947	-0.4477	0.2899	0.433	0.0103	0.003	0.1259
112025	-0.2337	-0.1465	0.1066	0.1559	0.0574	0.3794	-0.4684	-0.3011	0.146	-0.2433	0.1191	0.266	-0.1979	-0.1858	-0.304	-0.2151	-0.1386	-0.0754	-0.1634	-0.3169	-0.0838	-0.0604	-0.0898	-0.2489	0.0061	0.0311	0.1833	0.0774	-0.1415	0.0601	0.3051	0.223	0.4556	-0.1185	-0.0843	0.1223	-0.0745	0.0526	-0.1866	-0.0066	-0.3347	-0.0495	-0.0749	0.2287	0.3002	-0.1411	-0.1804	-0.1324	-0.015
112044	-0.38	1.3208	0.2061	0.0321	-0.6307	-0.4191	-0.5169	-0.103	-0.0356	-0.8777	-0.043	0.13	-0.3781	0.0092	-0.4505	-0.1387	0.088	0.1053	-0.3235	-0.3875	0.0387	-0.0874	-0.1242	-0.221	-0.8977	-0.4557	-0.2433	-0.3636	0.4088	0.4477	-0.2008	-0.1639	0.1154	-0.0031	-0.0325	0.2342	-0.0176	0.0627	-0.3726	0.0371	0.3463	-0.0174	-0.0986	0.0348	-0.431	-0.2862	-0.1962	0.0677	0.0592
112045	-0.4531	0.424	0.1551	0.1336	-0.3288	-0.6797	-0.1473	-0.2496	-0.1949	-0.2958	-0.3331	-0.0944	0.291	0.2193	0.2338	-0.0747	0.0611	0.0821	-0.0527	0.0173	0.2771	0.0184	-0.0235	0.1305	0.1261	0.0962	0.2187	-0.4685	-0.5762	0.3756	0.4132	-0.1862	-0.1448	0.0715	0.2573	-0.1946	-0.7472	-0.9835	-0.0956	0.1447	0.1459	-0.4194	0.047	-0.2649	-0.0167	-0.734	0.3017	-0.2004	-0.4642
112049	0.4807	0.1293	-0.2067	0.0961	0.0089	0.629	-0.0617	0.4633	0.5031	0.9412	-0.5223	-0.151	-0.2801	-0.0835	0.61	0.5589	0.4276	-0.0383	-0.3681	0.4702	-0.4025	-0.2269	0.1557	-0.1021	0.613	0.0101	-0.5752	0.2241	-0.0882	-0.4703	0.2369	-0.3768	0.2773	-0.4898	-0.5727	-0.3639	0.2522	0.3043	0.6548	-0.0523	0.1639	0.3118	0.1149	0.0754	-0.4818	0.3791	-0.4277	-0.6368	0.3025
112052	-0.2524	0.8627	1.05	0.1708	0.0484	-0.9302	-0.3999	-0.379	-0.1151	-1.0532	0.1957	-0.131	0.2882	-0.1536	-0.3454	0.2143	0.1201	0.367	-0.4713	-0.2966	0.299	-0.189	-0.2055	-0.3842	-0.1467	-1.4207	-0.0296	-0.52	-0.5447	0.8642	-0.5258	0.0206	-0.1588	0.3375	0.4187	0.4164	-0.3458	-1.3011	-0.9	0.1042	0.8027	-1.0524	-0.3186	-0.6686	0.1825	-1.1337	-0.6936	0.4524	-0.9051
112056	0.4499	-0.0444	-0.2851	-0.2203	0.0206	0.1252	0.2206	0.5105	0.2001	0.6102	-0.251	-0.0546	0.0136	0.1075	0.4796	-0.0728	0.0871	-0.0401	0.1038	0.1214	0.1388	0.0072	0.0491	-0.1132	0.2287	0.4761	-0.042	0.4982	0.4336	-0.1671	0.0575	-0.224	-0.3155	-0.2701	-0.3919	-0.1751	-0.0177	0.3074	0.1863	-0.0601	-0.2952	0.3636	0.2029	0.3175	-0.0501	0.2865	0.0414	-0.0378	0.1795
112057	0.808	0.1707	-0.2157	-0.195	-0.0087	0.1653	0.6793	0.3923	0.15	0.3901	-0.544	-0.3583	-0.0374	0.2818	0.3676	0.2247	-0.0019	0.2585	0.0499	-0.0317	0.402	0.0293	0.1467	0.3029	0.6245	0.6251	-0.15	-0.2888	-0.6373	-0.4874	0.3734	-0.2037	-0.3202	-0.282	-0.3868	-0.5394	0.2574	0.1821	-0.0288	0.1006	-0.0091	0.0089	0.4194	0.2226	0.5366	0.5509	-0.2217	-0.2876	-0.0661
112058	0.7154	0.1184	-0.2013	-0.1928	-0.2533	0.5375	0.066	0.5578	0.6324	0.4695	-0.7709	-0.1043	0.1163	0.0663	-0.0035	-0.1675	0.0353	0.1705	-0.3803	-0.1069	-0.3466	-0.344	-0.138	-0.1731	0.3459	0.2012	-0.5611	0.187	0.6055	-0.3783	0.2281	-0.5036	-0.3108	-0.581	0.2164	0.0044	-0.2347	0.189	0.3531	-0.2917	-0.3003	0.3709	0.4477	0.2057	-0.0907	0.2313	-0.1974	-0.097	0.2392
112066	-0.0101	-0.0086	-0.2537	0.1483	0.1126	0.0577	-0.0186	0.2674	0.1297	0.3687	0.0303	0.0303	0.0529	-0.0828	-0.0953	-0.1666	-0.1007	0.1214	0.1349	0.0961	-0.2775	-0.0438	0.0818	-0.1584	-0.2468	0.1259	-0.0779	0.1201	0.0561	-0.4697	0.2085	-0.044	0.0108	-0.0668	0.1807	0.0062	0.0921	0.0993	0.161	0.0534	-0.1595	0.2732	0.1829	0.0784	0.0015	-0.1195	0.0355	-0.0799	-0.1405
112071	-0.0349	0.6067	0.6934	0.2371	0.0602	-0.8197	-0.3434	-0.3447	-0.081	-0.506	0.0191	-0.2617	0.1555	-0.1027	-0.0775	0.2052	0.3056	-0.0548	-0.538	-0.2549	0.3438	0.0014	-0.0664	-0.0694	-0.1489	-1.0279	0.0885	-0.2713	-0.5461	0.56	-0.1715	0.0118	0.113	0.2801	0.3553	0.2177	-0.2267	-1.0719	-0.4128	0.1378	0.7353	-0.5771	-0.2439	-0.5492	0.0586	-0.7257	-0.332	0.1512	-0.4516
112075	-0.2069	-0.2029	-0.7407	-0.1343	-0.0869	-0.0638	-0.0026	0.1207	-0.1293	0.2744	0.046	0.056	-0.1966	-0.0514	-0.115	-0.0382	-0.2089	-0.2045	-0.2148	0.4077	-0.1815	0.0382	-0.0465	-0.005	-0.3116	0.2081	0.0597	-0.178	0.2757	-0.3024	-0.2412	0.1119	0.0832	-0.0294	0.1554	0.1406	0.0457	0.5057	0.243	0.0568	-0.3869	0.5406	-0.1567	-0.4664	-0.3816	0.1743	0.2484	-0.0383	0.5223
112107	0.192	0.3229	0.2025	-0.0463	0.2948	-0.2753	-0.1006	-0.1577	0.0274	0.0172	-0.1218	0.1262	-0.4309	-0.0642	0.3133	-0.0035	0.2447	0.1394	-0.2502	-0.3183	0.1295	-0.1074	-0.0898	0.0739	-0.0724	-0.5467	-0.162	-0.0133	-0.5208	0.1254	-0.4202	-0.2404	-0.1165	0.2003	-0.0001	0.4661	-0.012	-0.7433	0.268	-0.3898	-0.0369	-0.3277	-0.2492	0.0233	0.435	-0.1597	-0.7134	0.2524	0.3669
112110	0.3447	-0.0258	0.1563	-0.2208	-0.0991	0.3127	0.3587	0.1031	0.1968	0.1703	0.1076	0.0747	-0.2188	0.1762	0.7101	0.0564	-0.2389	-0.2704	0.2396	-0.494	0.1708	0.3045	0.1042	0.291	0.2431	0.2409	-0.0427	0.4263	0.3601	0.0645	0.4304	0.7316	0.2501	-0.1678	-0.3544	-0.0814	-0.0594	0.6836	-0.0061	-0.0779	-0.3508	0.1891	0.186	0.706	0.1025	0.394	-0.0535	0.3312	0.5589
112112	0.0118	-0.6841	-0.4132	0.081	0.1264	0.3181	0.7858	0.6433	-0.2505	0.2763	0.2524	0.25	0.1704	0.3073	-0.1526	-0.2702	0.2245	-0.0342	0.3839	0.1321	-0.3648	-0.1165	-0.202	0.1412	0.2334	0.1905	0.242	0.1735	0.571	-0.1002	0.057	0.1657	0.3553	-0.2481	0.2734	-0.2565	0.2867	0.7273	0.1653	0.0695	-0.2652	0.6416	0.1188	0.0412	-0.4591	0.4193	0.4436	-0.0968	0.0166
112123	-0.3036	0.2212	0.1938	0.245	-0.014	-0.4733	-0.1877	-0.3258	-0.1782	-0.4176	0.187	0.1106	0.0735	0.0318	-0.1664	-0.1348	-0.0446	-0.0064	-0.2306	-0.1804	0.0953	-0.0805	-0.1775	-0.0865	-0.1979	-0.3794	-0.0769	-0.0758	-0.2423	0.3843	-0.3297	0.0433	-0.1101	0.2855	0.3729	0.3068	-0.2942	-0.0664	-0.0127	0.0602	0.2747	-0.1457	-0.1797	-0.2784	-0.0852	-0.4931	0.0445	0.2012	-0.3467
112126	0.1845	-0.1003	-0.0887	0.0224	-0.0404	0.448	-0.1166	0.176	0.5073	0.4418	0.1473	0.4464	-0.0266	-0.2856	-0.5146	-0.255	-0.037	-0.3768	0.3067	0.0615	-0.337	0.1928	-0.1229	-0.0821	-0.5515	0.1305	0.1956	0.6252	0.7051	-0.3122	0.1632	0.0143	0.3704	-0.1861	0.0994	-0.023	0.0274	0.5778	0.4063	0.0275	-0.4427	0.2313	-0.2363	0.4579	-0.1569	-0.0562	0.0288	-0.2744	0.5279
112167	-0.3562	-0.4094	-0.6176	0.0984	-0.0772	0.2297	0.1649	0.302	-0.3102	0.7732	0.0666	-0.0889	0.1934	-0.0299	0.2023	-0.3868	-0.0013	-0.1369	0.2468	-0.373	-0.3433	-0.1152	-0.1099	-0.1173	-0.07	0.2663	-0.0809	0.1484	-1.3111	-0.1658	-0.0446	-0.1335	0.1936	-0.5046	0.2019	-0.4585	0.4683	-0.8318	0.4742	-0.2061	-0.4406	0.2449	-0.2032	0.1839	-0.4428	-0.0497	0.2194	-0.3782	0.1202
112169	0.4905	-0.2654	-0.4559	-0.3496	0.134	0.2201	0.241	-0.2087	0.3319	-0.0087	-0.3094	-0.2967	-0.3262	-0.0394	-0.0172	0.3248	0.1915	-0.3413	-0.2301	0.4494	0.1171	-0.1826	-0.195	0.4848	0.615	0.1838	0.0604	-0.3219	0.9923	-0.2184	0.1169	-0.4789	-0.0489	-0.0439	-0.5661	0.0414	0.2851	0.4042	-0.2725	-0.1402	-0.1392	0.0829	0.2763	0.0089	0.5621	0.411	-0.323	-0.3268	0.3945
112181	-0.1835	-0.0976	-0.0887	0.2652	-0.0895	0.2357	0.3273	-0.0478	0.0932	0.0412	0.099	0.1503	-0.115	0.2046	0.227	0.049	0.3415	-0.0681	0.17	-0.041	0.0906	0.3535	0.1907	0.1293	0.0956	0.2349	0.2442	0.2166	0.2795	0.1266	0.2148	0.3056	0.0438	-0.0206	-0.0505	-0.3104	-0.1267	0.4662	0.2554	0.155	-0.5808	0.5581	0.2099	0.4669	0.2034	0.4578	0.2284	0.2029	0.086
112182	0.507	-0.7361	0.0097	-0.0097	-0.2627	-0.6472	0.185	-0.4407	0.0377	0.0051	-1.0938	-0.347	-0.608	0.2757	-0.0157	0.4153	0.083	-0.9429	-0.483	0.5231	0.1283	-0.4467	-0.1657	0.4515	-0.0962	0.3906	-0.4456	1.039	0.5735	-0.6134	-0.1066	-0.0106	-0.3392	-0.1845	-0.064	0.1145	-0.3937	0.1716	-0.0469	0.3445	0.1281	0.0699	-0.0364	-0.5611	-0.1564	0.2562	-0.3214	-0.672	0.3683
112185	0.0368	0.1717	-0.5749	0.1816	0.0872	0.3109	-0.0944	0.297	0.2071	0.6075	0.2675	0.1508	0.0021	-0.0511	-0.3101	-0.17	-0.0336	-0.0641	0.1469	0.2003	-0.1139	0.0614	-0.0027	0.1601	-0.1537	0.2185	0.1212	0.5644	0.4711	-0.1689	0.1897	0.0407	0.2458	0.2443	-0.1134	0.0695	0.2442	0.8101	0.4375	-0.226	-0.4968	0.4588	-0.1447	0.2769	-0.381	-0.1445	0.0406	-0.1756	0.5122
112186	-0.3397	0.3734	0.3196	0.2453	-0.031	-0.4913	-0.2134	-0.2885	-0.1713	-0.4645	0.1197	-0.1755	0.0569	0.0244	-0.1966	0.0459	0.1038	-0.0924	0.0515	0.0355	-0.0365	-0.1409	-0.2905	-0.121	-0.034	-0.4167	-0.0544	-0.4042	-0.2538	0.4887	-0.509	0.1052	0.0165	-0.0092	0.4847	-0.0058	0.1071	-0.275	-0.2748	-0.025	0.262	-0.408	-0.2396	-0.4193	-0.2232	-0.9256	0.1876	0.0626	-0.5195
112192	-0.198	0.7224	0.7077	0.1643	0.1576	-1.0058	-0.4976	-0.3044	-0.1748	-0.6967	0.1024	-0.6641	0.4386	-0.1464	-0.2016	0.1404	-0.1696	0.1511	-0.3381	-0.2123	0.3153	-0.0524	0.1388	-0.1928	0.0727	-1.1422	0.0508	-0.5849	-0.7869	0.8738	-0.493	0.1484	0.1921	0.2499	0.3786	0.3378	-0.3001	-1.4469	-0.8298	0.266	0.7705	-1.4421	-0.2725	-0.4786	0.4208	-1.0205	-0.425	0.2248	-1.1572
112198	1.0425	-0.165	-0.4752	0.1768	0.2691	0.3086	0.8272	0.7899	0.1052	0.7285	-0.0208	-0.0708	0.3039	-0.1891	0.79	0.4667	0.5277	0.4502	0.6687	0.3013	0.566	0.0655	0.7141	-0.0358	0.9179	0.7412	0.4071	-0.011	0.1089	-0.2445	-0.0851	0.0741	0.1144	-0.4294	-0.0136	-0.6249	0.6608	0.4966	0.65	0.0796	-0.247	0.5642	0.4864	0.232	0.431	1.1108	0.0615	0.1242	-0.0496
112214	-0.1025	0.1727	-0.1864	0.0672	-0.1603	0.1893	-0.1467	-0.249	-0.0992	-0.0159	0.1496	0.1628	0.084	-0.0441	-0.2017	-0.3199	0.0344	-0.2507	0.1665	-0.119	-0.2086	0.2288	0.1692	0.1439	-0.1988	0.1974	0.1602	0.1292	0.2196	0.0191	0.1676	0.1765	0.1712	0.1332	0.1465	0.0309	-0.12	0.1674	0.1518	-0.1513	-0.1525	0.0566	-0.2948	0.2927	-0.1554	-0.0496	0.1381	-0.0175	0.3794
112225	0.1082	0.263	0.091	-0.0712	-0.0979	0.1152	0.208	-0.1723	-0.123	-0.2107	-0.0308	0.0867	0.1488	0.2432	0.2491	-0.1011	-0.1075	-0.0443	0.0377	-0.1859	0.0873	0.2129	0.0879	0.1424	0.0315	0.2503	0.0959	-0.182	-0.1108	0.0167	-0.0885	0.2621	-0.1583	0.0077	-0.2308	0.0639	0.0903	-0.0982	0.1064	-0.0337	-0.0191	-0.2667	-0.035	0.1485	0.0979	0.3238	0.0211	-0.2265	0.1605
112240	0.7034	-0.4228	-0.1881	-0.7249	0.3409	0.145	0.1875	-0.185	0.1132	-0.3215	-0.8697	-0.0541	-0.7482	-0.0019	-0.2324	0.3235	-0.5499	-0.8452	-0.5844	0.6226	-0.0212	-0.1115	0.2989	0.1956	0.5479	0.5802	-0.1185	-0.2318	0.4501	-1.0325	0.6122	-0.2801	0.0436	0.0722	-0.2896	-0.1373	-0.4215	0.554	0.0545	0.1676	0.0047	0.083	0.37	-0.4653	0.0233	0.1115	-0.0014	-0.7557	0.3884
112248	0.3056	-0.4995	0.9157	0.0545	-0.3124	0.0015	0.2678	0.3867	-0.1667	0.6204	0.1775	0.326	1.0354	-0.4689	-0.3332	-0.5885	0.9233	0.1164	0.1485	-0.5197	-0.0823	0.4483	0.3043	-0.1301	-0.2983	0.0654	0.1821	0.3062	-0.0331	0.2108	-0.0084	0.4219	-0.0733	-0.2475	0.0068	0.4748	0.0276	0.0953	-0.4286	0.5922	0.1356	-0.2151	0.323	0.2406	0.4144	-0.7469	0.1286	-0.0329	0.2301
112284	0.7031	-0.5779	0.1234	-0.3664	0.4842	0.067	-0.0005	0.2039	0.0695	0.1124	-0.6883	-0.1812	-0.2748	0.227	-0.1236	0.1502	0.4058	-1.2165	-0.4326	-0.7661	-0.4829	0.4307	0.368	0.1998	0.4313	0.2967	-0.093	-0.6415	0.7485	-0.108	0.3061	-0.0822	0.3372	0.204	-0.7666	0.2559	-0.2917	0.6307	-0.1872	-0.0934	-0.1526	-0.1804	0.4271	-0.5007	0.7305	0.4025	-0.3838	-0.2835	0.0457
112287	-0.7605	-0.0975	0.2466	0.1068	-0.0554	-0.0632	-0.4902	-0.9455	0.0045	-0.6795	0.1092	-0.0653	-0.3116	0.359	-0.2712	-0.5412	-0.2635	-0.2622	-0.0138	-0.4251	0.0936	-0.0021	0.0555	0.0422	0.1361	-0.1168	0.2903	-0.386	-0.1099	0.431	0.203	0.559	0.1684	0.1796	0.0249	0.2108	-0.69	0.523	-0.4932	0.0647	0.1685	-0.3373	0.128	-0.9501	-0.8474	0.2066	0.0664	-0.4157	-0.3624
112290	-0.2909	-0.0289	-0.1501	0.0573	-0.0596	0.1876	0.0481	-0.4151	0.0137	-0.1544	0.3837	0.0862	-0.0067	0.1443	-0.0957	-0.1581	-0.0592	0.1811	0.1256	0.0305	0.0376	0.2226	0.3058	0.182	0.0923	0.1536	0.2516	0.4603	0.5734	0.2029	-0.042	0.3213	0.133	0.2489	0.1121	0.393	-0.118	0.562	0.1112	0.1841	-0.0651	0.3449	0.1175	0.4777	-0.2403	0.2539	0.2108	0.2038	0.198
112342	0.3245	-0.154	-0.8987	0.1777	0.2524	0.2038	0.4683	1.0173	-0.1792	1.0705	-0.228	-0.2585	-0.0726	-0.2147	0.7196	0.0688	0.2634	0.2114	0.6364	0.081	0.2927	-0.0685	0.3621	-0.3213	0.5212	0.2287	-0.0272	0.6721	-0.0266	-0.5985	-0.1696	-0.2124	-0.2531	-0.3864	-0.0864	-0.8967	0.6965	0.1234	0.8946	-0.0297	-0.1258	0.4219	0.1791	0.1475	-0.4371	0.7773	0.3022	0.0437	0.1136
112344	-0.1086	0.5924	-0.0447	0.0065	-0.0642	-0.6132	-0.0496	0.1917	0.161	-0.3259	-0.2926	-0.3123	0.3654	-0.1123	0.167	0.4265	0.2711	0.1594	0.0643	0.0611	0.3935	-0.4702	-0.2207	-0.0789	-0.2428	-0.7359	-0.7486	-0.1917	0.3331	0.0044	-0.2483	0.1312	-0.2122	0.3994	0.7422	-0.2561	0.1384	-1.279	0.8732	-0.1288	0.5286	-1.2769	-0.5685	-0.4982	0.563	-0.7644	-0.6987	0.2983	-0.882
112346	-0.5067	-0.1629	0.1873	-0.2538	-0.0293	0.2665	0.1908	0.1517	-0.0365	-0.14	0.0453	-0.0115	-0.3263	0.023	0.1521	-0.2836	-0.0307	-0.282	0.3748	0.0035	-0.2469	0.2863	-0.8221	-0.3713	-0.3088	0.496	-0.433	0.3831	0.2737	-0.595	-0.3998	0.0313	-0.2379	0.4528	0.1353	0.0429	-0.2065	0.0097	-0.1107	-0.3579	-0.6771	0.5457	0.0133	-0.1756	-0.0663	0.2758	0.0277	-0.4368	0.5355
112355	0.8016	-0.6328	0.4997	-0.151	0.0848	0.522	-0.3958	0.1945	0.1632	0.323	0.2095	-0.4426	0.2001	0.041	0.411	0.1499	-0.1133	0.514	0.046	0.1412	0.4341	0.3779	0.1471	0.2848	0.4157	0.6245	0.3706	0.2957	-0.0554	-0.1419	0.6144	0.2665	-0.1888	-0.1096	-0.6439	-0.2919	-0.1109	0.5853	-0.3511	0.3851	-0.0412	0.4095	0.3154	0.3067	0.6559	0.8035	-0.162	0.5218	-0.2678
112357	-0.2435	0.3119	-0.3724	-0.0395	0.2418	0.2877	0.313	-0.121	0.0322	-0.1429	0.2197	0.577	-0.0331	0.0367	0.0394	0.1566	-0.1408	0.0326	0.0783	-0.0045	0.1146	0.1809	-0.3045	-0.0702	0.056	0.2425	0.6385	0.4185	0.398	-0.0921	-0.1308	0.2204	0.2259	0.18	0.0981	0.0302	-0.0208	0.7691	0.4628	0.0379	-0.1945	0.5456	0.3264	0.2245	-0.1764	0.7589	0.3504	0.017	0.1343
112362	-0.1572	0.4272	0.7204	0.1669	0.0743	-0.8012	-0.3901	-0.3213	-0.1998	-0.672	0.0842	-0.1776	0.0852	-0.1365	0.0147	0.2374	-0.0077	0.0243	-0.275	-0.4614	0.3002	-0.0274	-0.0231	-0.2922	0.182	-0.8748	0.0371	-0.4452	-0.496	0.7017	-0.3058	0.0135	0.0387	0.1663	0.3657	0.4034	-0.2297	-1.4798	-0.6695	0.0745	0.652	-0.9675	-0.2078	-0.4752	0.0947	-1.1468	-0.3633	0.315	-0.4717
112366	-0.4302	0.2478	0.408	0.184	0.1652	-0.8926	-0.0801	-0.5018	-0.3724	-0.7023	0.0208	-0.1244	0.2157	-0.1342	-0.1205	0.2249	0.2358	0.0148	-0.2318	-0.2125	0.2748	-0.0703	-0.0411	-0.0973	-0.1036	-0.5925	0.0167	-0.4008	-0.3327	0.5422	-0.3592	0.1288	0.0416	0.3405	0.2518	0.3014	-0.0454	-0.9187	-0.5637	0.0775	0.314	-0.8955	-0.125	-0.4488	-0.1477	-0.7402	-0.1457	0.2298	-0.5132
112379	0.1057	0.9248	0.9925	0.026	-0.8146	-0.4251	-0.1068	-0.3218	0.316	-0.846	0.0724	-0.2015	0.0851	-0.2913	-0.1855	0.2955	0.3754	0.2532	-0.6652	-0.3832	0.286	-0.1722	0.3684	-0.2872	-0.2701	-0.534	0.1757	-0.691	-0.6338	0.4756	-0.3305	0.132	-0.2467	0.4297	0.034	0.205	-0.2123	-0.8098	-0.7934	0.0257	0.3395	-0.6588	-0.1524	-0.7656	-0.0582	-0.6813	-0.2718	0.0909	-0.2196
112383	0.4557	0.171	0.2179	-0.1046	0.0117	0.2905	0.1757	0.477	0.4166	0.4154	-0.0555	0.1588	-0.1252	-0.0235	0.1437	-0.0199	-0.2456	-0.0998	-0.2082	-0.1782	-0.104	-0.1469	-0.2148	-0.4275	-0.2241	-0.0544	-0.0236	-0.1599	0.1106	0.0637	0.1892	0.0806	-0.3319	0.1227	-0.289	0.1778	-0.1973	0.5743	0.0031	-0.1911	-0.2831	0.1631	0.0034	0.1321	0.3468	0.0899	-0.3133	-0.1819	0.5455
112410	-0.2561	0.5578	0.5308	0.7449	-0.339	-0.1953	-0.1774	-0.2841	-0.0331	-0.567	0.3043	0.2425	-0.0036	-0.2813	-0.4867	0.203	-0.1094	0.2772	-0.3524	-0.142	0.5537	-0.2164	-0.2221	-0.2728	-0.4188	0.1842	0.1428	-0.1397	-0.3486	0.0122	-0.5913	-0.5255	-0.3138	0.5137	0.0126	0.1389	0.0433	-0.1712	-0.8131	-0.4185	0.1104	-0.513	0.1783	-0.4798	-0.5527	-0.5355	-0.1541	0.0983	-0.3648
112415	-0.1899	0.2221	-0.8252	0.1283	-0.1464	0.4295	0.038	0.3261	0.3178	0.6185	0.3705	0.1993	0.3274	-0.2026	-0.0814	-0.1325	-0.1446	-0.1075	0.2976	0.2924	-0.0606	-0.093	-0.1864	-0.184	-0.1736	0.1493	-0.2235	0.3965	0.6549	-1.0127	0.1326	-0.3961	0.7342	-0.3539	0.1673	-0.1599	0.2466	-0.4821	0.4989	0.2814	-0.6239	0.109	0.0589	0.2548	-0.3742	-0.3096	0.0861	-0.0235	0.2214
112430	-0.0901	0.0638	0.2645	0.0944	0.0718	-0.3701	-0.0568	-0.622	-0.2804	-0.3258	0.0492	-0.3641	0.2863	0.3215	0.017	0.0981	0.0524	-0.1731	-0.32	-0.0321	0.0166	-0.0212	-0.0751	0.1921	0.3016	-0.3291	-0.0732	-0.4038	0.0037	0.3157	0.2008	0.2206	0.239	0.1188	0.2222	0.2577	-0.4395	-0.3118	-0.1259	0.1742	0.2814	-0.218	-0.0146	-0.2082	0.0626	-0.4043	0.0761	0.1038	-0.2671
112440	0.7485	0.5958	0.1722	0.0646	-0.7511	-0.1098	0.2932	-0.4034	-0.4157	0.0086	0.0612	-0.235	-0.1685	-0.0358	0.4653	0.1447	-0.0816	-0.3652	-0.1813	0.0954	0.0356	0.2032	0.5643	0.1495	-0.1573	0.0711	-0.079	-0.4583	-0.113	-0.2564	0.1725	0.0136	-0.2912	-0.0847	-0.4801	0.0194	-0.4092	-0.2913	-0.1272	-0.0123	0.3443	-0.1204	0.1141	-0.3242	0.0654	0.5322	-0.1701	0.0304	0.3651
112443	-0.0547	0.7042	0.2962	-0.2359	0.1769	0.2605	-0.5683	-0.0879	-0.0726	1.4215	-0.1149	0.1168	-0.5277	-0.2609	-0.0801	0.0078	-0.2917	-0.1111	-0.0298	-0.1244	-0.11	-0.2778	-0.432	-0.0057	0.1047	-0.8774	0.0988	-0.0757	0.2981	0.5136	-0.4262	0.2287	0.3704	0.0774	-0.3278	0.7689	-0.3148	-0.2016	0.252	0.0282	-0.079	-0.248	-0.6693	-0.1579	0.3349	-0.5604	-0.3526	-0.012	-0.2194
112457	0.4018	-0.3924	0.1343	-0.0841	-0.0931	0.168	0.2126	0.109	0.2214	0.5984	-0.1898	-0.1614	-0.1324	0.0925	-0.1208	-0.0767	-0.1912	-0.1053	-0.1401	-0.0667	-0.1573	-0.2236	0.0825	-0.02	-0.0378	0.6418	-0.2236	-0.092	-0.2156	-0.6689	0.2527	-0.1944	-0.418	-0.3998	-0.4624	-0.3611	0.0033	-0.4878	0.058	-0.0105	0.1507	0.3293	0.0702	0.0709	0.1449	0.3254	0.1064	-0.4202	0.018
112458	0.6651	0.4649	0.0066	-0.3366	0.0803	1.2573	-0.0717	1.1795	0.5117	1.1779	-0.1477	-0.6661	0.1649	-0.0012	0.1941	0.0241	0.1237	0.7596	0.0193	0.31	0.4641	-0.3606	0.5156	-0.344	0.4648	0.079	-0.3957	0.3155	-0.2739	-0.4939	1.0461	-0.3734	-0.3356	-0.4066	-0.3697	-0.6995	0.1715	0.3518	0.4991	-0.0897	-0.2098	0.3319	0.2489	0.2398	0.2323	0.3283	-0.1579	-0.0445	-0.7743
112462	0.8123	-0.257	-0.6799	-0.2041	0.4062	-0.3268	0.3035	1.2004	0.6085	1.0974	-0.4822	-0.6517	-0.1444	-0.1898	0.4365	-0.1591	0.2949	0.2341	0.6158	0.7854	0.3492	-0.1551	0.0829	0.039	0.1423	0.5663	-0.3726	0.4086	0.0634	-0.6437	0.2419	-0.3845	-0.7369	-0.2418	-0.274	-0.9295	0.4231	0.1946	0.2611	-0.5	0.0534	0.7157	0.3717	0.1875	-0.0385	0.2835	0.2041	0.1801	-0.0477
112467	0.5509	0.215	0.2275	-0.8432	-0.1082	0.7039	0.2755	0.4904	0.4865	0.7654	-0.7687	0.0249	-0.3198	0.2099	0.2013	0.4493	0.5699	0.1526	-0.0354	0.0694	0.0024	0.0457	0.4418	-0.0909	0.0412	0.3236	0.0994	0.3975	-0.2732	-0.3118	0.7956	-0.2137	0.1953	-0.1655	-0.8196	-0.5055	0.1842	0.1865	0.0639	0.0668	-0.1542	0.0674	-0.0934	0.5594	0.0105	0.5225	0.1962	-0.2524	0.3007
112482	0.5517	0.2033	0.2203	0.032	-0.3459	0.1551	0.3653	-0.1412	0.1614	-0.1543	-0.3208	0.3377	-0.1651	-0.1304	0.238	0.5288	0.2328	-0.3288	-0.2372	0.3409	0.1286	0.2439	0.3912	0.2657	0.2441	0.3709	-0.0088	0.557	0.2874	-0.2595	0.4802	0.4363	0.1048	0.3269	-0.6094	0.2321	-0.1585	0.501	0.3207	-0.0318	0.3688	0.1624	0.2568	0.2098	0.0143	0.5267	0.2175	-0.0618	0.0309
112516	-0.2772	-0.413	0.2602	0.0973	-0.2097	0.161	-0.0301	-0.1458	-0.3837	-0.4214	0.3305	-0.1716	-0.0779	0.0681	0.2406	0.0596	0.0963	0.4715	-0.0983	-0.1557	-0.053	0.2303	-0.1579	0.162	-0.0255	-0.0219	0.3452	0.1474	0.0466	0.3381	0.0553	0.4954	-0.0456	0.2514	0.0342	0.0118	-0.2678	0.4823	-0.1157	0.1506	0.0238	0.1397	0.0842	0.115	-0.1087	0.3024	0.0348	-0.2578	0.5467
112524	-0.2719	0.4011	0.5283	0.0198	0.041	-0.6067	-0.1909	-0.2657	-0.2367	-0.4213	-0.1851	-0.1976	0.1706	-0.007	-0.159	0.3192	0.0979	-0.112	-0.1913	-0.0494	0.2456	-0.0457	-0.0786	-0.0321	-0.0911	-0.6034	0.0046	-0.324	0.1615	0.5248	-0.0479	0.0428	-0.0472	0.256	0.2036	0.3561	-0.5167	-0.4481	-0.3446	0.2896	0.414	-0.5709	-0.1111	-0.3353	-0.0872	-0.702	-0.1781	0.2859	-0.4393
112548	0.044	-0.4515	-0.0239	-0.4185	-0.0304	0.3456	-0.4481	-0.7924	-0.3099	-0.2203	-0.0388	-0.0934	-0.4107	0.1691	-0.1372	0.0258	-0.6737	-0.1659	-0.6582	-0.1707	-0.2186	-0.1414	-0.0699	0.1554	0.1012	0.2309	-0.049	-0.2278	0.0422	-0.1553	0.587	0.1325	-0.0125	0.1798	-0.4654	0.1949	-0.3536	-0.153	-0.2609	0.0003	-0.0162	-0.2447	-0.0491	0.045	0.4632	0.1025	0.1402	-0.3045	0.2221
112560	-0.0546	0.5179	0.6886	0.2251	0.0014	-0.5647	-0.2621	-0.3907	-0.2265	-0.745	0.1893	-0.2365	0.1469	0.0068	-0.3374	0.1585	0.2	0.1363	-0.0934	-0.09	0.0974	0.2846	-0.1	0.0759	-0.2498	-0.3987	0.1445	-0.1659	-0.3963	0.7718	0.0326	0.2733	-0.2052	0.483	0.2662	0.4426	-0.6989	-0.4096	-0.6558	0.2864	0.3028	-0.2749	-0.0821	-0.5018	0.0308	-0.8637	-0.0752	0.2028	-0.1192
112567	0.989	-0.4893	0.1461	-0.4341	-0.2451	-0.0357	-0.0446	-0.6015	-0.1653	0.0062	-0.5892	-0.2369	-0.4592	0.173	0.2538	0.1322	-0.1457	-0.7695	-0.3531	-0.0432	0.0474	0.3819	0.3891	0.5651	0.2678	0.4447	-0.1164	0.1059	0.569	0.2417	0.2634	-0.0556	0.109	0.2315	-0.5841	0.1236	-0.2765	0.0781	-0.4555	-0.042	-0.029	-0.2736	-0.2637	0.3784	0.6163	0.265	-0.409	-0.2899	0.5082
112568	0.9618	-0.3982	0.3394	-0.4593	0.0486	-0.0451	0.0663	-0.2447	-0.2601	-0.0634	-0.4881	-0.6985	-0.2174	0.3636	0.0968	0.1879	-0.0358	-0.3716	-0.2987	-0.1887	0.1393	0.2474	0.3569	0.4948	0.7368	0.2053	0.3701	-0.8566	0.2109	-0.381	0.0103	0.1359	0.079	-0.0812	-0.4503	-0.2127	0.093	-0.0991	-0.9596	0.0448	-0.3099	-0.2466	0.2325	0.0964	0.4918	0.4527	-0.5249	-0.5954	0.0929
112571	0.0324	-0.5159	-0.2617	-0.1812	-0.3884	-0.112	-0.0992	-0.1481	-0.7357	-0.1616	-0.2008	-0.2392	-0.9202	0.4438	0.2134	0.1307	-0.1487	0.1768	-0.5942	-0.0354	0.3501	0.3656	0.0625	0.4852	0.454	0.3131	0.0276	0.4111	0.6116	-0.0438	0.0843	-0.0886	0.0372	-0.0207	-0.6557	0.5873	0.1246	0.6027	-0.3691	-0.2477	-0.4591	0.0991	0.1828	0.5769	0.8561	0.3174	-0.1649	-0.2172	0.4762
112577	-0.4969	-0.5942	-0.5015	0.2018	-0.3645	0.3002	0.0352	0.0844	-0.0812	0.3561	0.0456	0.0477	-0.2712	-0.269	-0.1227	-0.461	0.2342	-0.2839	0.5394	-0.0898	-0.4606	-0.1631	-0.4452	-0.1373	-0.3829	0.072	-0.1788	0.4236	0.4209	0.0508	-0.4781	-0.0118	0.3753	-0.3237	0.2504	-0.46	0.3266	0.4601	0.3705	-0.3111	-0.437	0.3505	-0.2334	0.0786	-0.5406	-0.0597	0.0775	-0.3561	0.4012
112586	0.8544	-1.5205	-1.5565	-0.0882	-0.3643	0.8517	0.6197	1.4384	1.3129	-0.1127	-0.1215	1.2149	-0.6181	-0.1528	-0.3787	-0.3019	-0.8528	0.095	0.2219	0.2569	-0.2116	0.6311	0.6481	-0.1247	-0.2504	0.4097	0.0364	-1.8535	1.4479	-1.873	-0.2679	-0.1423	-0.9447	-0.2667	-0.5671	0.7689	0.743	0.669	0.8977	0.3409	0.5685	-0.7498	0.4958	0.7451	1.0058	-0.9842	0.3984	-0.9094	0.4374
112601	-0.3567	-0.2892	-0.1508	0.2072	-0.2458	0.4836	0.1667	-0.0587	-0.0395	0.0584	0.6404	0.2748	0.0388	-0.2014	-0.1347	-0.4191	-0.245	0.1729	0.222	0.3479	-0.1469	0.1456	-0.0559	0.1113	-0.6435	0.0432	0.1991	0.0757	0.1361	0.0218	0.4008	0.701	0.1605	0.2478	0.1198	0.3329	-0.1365	0.2054	0.0166	0.2757	-0.498	0.2846	0.0284	0.5298	-0.0144	-0.0249	0.0693	-0.2032	0.7045
112606	-0.199	-0.3539	-0.4639	-0.0308	0.0292	0.212	0.153	-0.0537	-0.0676	0.0865	0.2597	0.0484	-0.0185	-0.035	-0.2095	-0.2066	-0.3683	0.0229	0.1711	0.1113	-0.2263	-0.0785	-0.0513	0.0681	-0.0859	0.2713	0.0117	0.2302	-0.0106	-0.1321	-0.0379	0.0013	-0.1322	-0.0931	0.1366	-0.0676	0.0963	0.5233	0.1322	-0.0958	-0.3069	0.3204	0.0344	0.236	0.091	0.2626	0.2717	-0.0228	0.1587
112640	1.1147	-0.7184	1.0839	-0.9531	-0.7186	-0.5015	-0.351	-0.5995	0.9074	0.05	-0.0086	0.1745	-0.2116	0.373	0.1549	-0.413	-0.5834	-0.4958	-1.3076	-0.7482	-0.0503	0.1755	-0.0928	0.6614	-0.8297	1.0361	-1.0036	-1.0711	0.1092	-0.3182	0.3236	-0.099	-0.7708	-0.0837	-0.8179	-0.1367	-1.088	-0.2693	-1.6261	-0.6627	1.3807	-0.1924	0.3278	0.3712	-0.0027	0.1008	-0.2278	0.25	1.3783
112661	-0.3212	-0.1141	0.0789	-0.2367	-0.3737	0.43	-0.153	-0.5082	-0.4311	-0.5011	0.2257	0.5025	-0.3441	0.1655	0.2875	-0.2525	0.2083	-0.2897	0.4728	-0.0785	0.0034	0.3691	-0.2034	0.1309	-0.2009	0.3089	0.3987	0.5805	0.2884	0.4991	-0.3576	0.3062	0.0794	0.4506	-0.0125	0.3076	-0.3744	0.638	-0.0941	-0.1197	0.0269	0.0306	0.1515	0.4608	-0.0468	0.615	0.324	0.3025	0.3831
112668	0.0802	0.2291	-0.5745	0.2878	-0.2384	-0.081	0.0999	0.1001	0.1916	0.6145	-0.3796	0.2328	-0.2401	-0.1151	-0.4672	-0.0987	-0.2436	-0.1937	0.1921	0.4636	-1.0153	-0.4438	-0.0966	0.1346	-0.5578	0.2679	-0.3186	-1.2344	-0.4815	-1.6374	-0.7771	-0.7678	-0.0863	-0.4111	-0.0125	-0.2423	0.5924	-0.0443	0.9406	-0.0796	-0.2385	1.1065	-0.1466	-1.1212	-0.3003	-0.2058	0.4603	-0.0779	-0.595
112676	0.691	-0.2685	0.6183	-0.2387	0.2873	-0.0751	0.0755	-1.4179	0.3119	0.3177	-1.6171	-0.3555	-0.4611	0.5819	0.6059	-0.5496	-0.5092	-1.1016	-0.5719	-0.2133	-0.1621	-0.0395	0.0819	0.4488	-0.0307	0.2606	-0.4191	0.4653	0.7183	-0.3565	0.5947	-0.2941	0.6282	0.0702	-0.882	0.6073	0.1574	0.0121	-1.0991	-0.1556	-0.0585	0.04	-0.5632	-0.0789	-0.5548	0.1409	-0.8378	-0.4814	1.3219
112686	-0.2846	0.7422	0.8851	0.0584	-0.2813	-0.4585	-0.4247	-0.0842	0.1135	-0.8144	-0.1003	0.1068	0.0543	-0.0621	-0.3924	0.1051	0.0753	0.4545	-0.4088	-0.2155	0.2253	-0.1687	-0.0767	-0.4194	-0.2777	-0.8137	-0.0608	-0.245	0.1039	0.658	-0.4669	-0.0083	0.0318	0.4925	0.3101	0.4075	-0.5669	-0.8602	-0.5739	0.077	0.5136	-0.6403	-0.1497	-0.4042	0.2261	-0.9343	-0.4441	0.3279	-0.6032
112697	-0.3452	0.117	0.4606	-0.302	0.0703	-0.3785	-0.3766	0.0741	-0.2666	-0.4188	0.2284	-0.1075	0.1854	0.0798	-0.2508	0.0957	0.0624	-0.2253	-0.547	-0.0415	0.2095	0.0361	0.0661	-0.1331	-0.4709	-0.427	0.3784	0.1822	-0.4251	0.534	-0.0415	0.5283	-0.1007	0.2494	-0.0156	0.2308	-0.2283	-0.5108	-0.2348	0.3411	0.3066	-0.3485	-0.0842	-0.3246	0.2308	-0.5186	-0.1334	0.1915	-0.111
112698	-0.0069	-0.1642	0.126	0.0303	0.002	-0.0999	0.1078	-0.3756	-0.267	-0.2612	0.0373	0.1563	-0.2362	-0.0108	-0.0282	-0.0621	-0.2887	-0.2912	-0.2516	-0.3265	0.099	0.0508	-0.2548	-0.0612	-0.1459	0.0932	-0.0278	0.3198	0.0097	0.357	-0.1087	0.1933	-0.0746	0.2675	-0.1586	0.1422	-0.2383	0.2979	-0.2449	0.1226	-0.1616	0.2282	0.2707	0.2033	0.1654	0.3843	-0.2108	-0.0942	0.1285
112710	-0.1123	0.3301	0.6168	0.1998	-0.0346	-0.8963	-0.2443	-0.5398	-0.4377	-0.5499	0.0625	-0.268	0.4988	0.1807	-0.0703	0.076	-0.0742	-0.0404	-0.5299	-0.3301	0.1781	-0.058	0.1473	0.1308	0.1221	-0.5268	0.1125	-0.6932	-0.5542	0.6066	0.0873	0.2418	0.1005	0.1235	0.1113	0.1487	-0.0459	-1.0467	-0.651	0.1858	0.451	-1.0145	-0.0384	-0.3339	0.2448	-0.5844	-0.0866	0.119	-0.6634
112712	-0.0931	0.441	0.8015	0.0757	-0.0339	-0.6559	-0.4006	-0.5301	-0.1808	-0.4453	0.0152	-0.0543	0.3259	0.0376	-0.0886	0.2501	0.0592	0.3609	-0.436	-0.3512	0.0782	-0.1645	-0.1173	-0.1321	0.0054	-0.7036	-0.1075	-0.3421	-1.2788	0.3763	0.0975	-0.1042	-0.011	0.3385	0.3379	0.0984	-0.051	-1.0512	-0.3552	-0.0815	0.5163	-0.9418	-0.0663	-0.4963	0.0726	-0.5507	-0.2742	0.2175	-0.7783
112718	0.493	-0.049	0.1536	-0.1072	0.002	0.4196	0.0299	-0.3271	-0.1229	-0.1294	0.1307	0.1712	-0.2185	0.0942	-0.197	-0.0214	-0.5692	-0.5029	-0.3293	-0.6231	-0.1299	0.4205	-0.0596	0.1388	0.0615	0.4253	0.158	-0.18	0.0293	0.2275	0.2192	-0.0097	-0.0072	0.0734	-0.3342	0.103	-0.2299	0.6889	-0.0067	0.0881	-0.374	0.1078	0.2623	0.3996	0.358	0.7148	-0.0827	-0.2136	0.3679
112723	0.4996	-0.0135	0.4793	-0.1847	0.117	0.3182	-0.1114	0.0291	0.1847	-0.2069	-0.2971	-0.284	-0.1964	0.2221	0.1448	0.0143	0.3481	0.0873	-0.1567	-0.3373	0.1415	0.071	-0.0019	0.2782	-0.2793	0.227	-0.2229	-0.0425	0.4252	-0.1486	0.1212	-0.0818	-0.2051	-0.199	-0.6565	0.0937	-0.2155	-0.101	0.0211	0.1199	0.2384	-0.0554	-0.0179	0.1058	0.3039	0.3254	-0.3679	-0.3233	0.5227
112729	-0.221	1.1092	0.2642	0.8448	-0.687	0.3546	0.6978	-0.3944	0.5767	0.317	-0.7103	-0.0164	0.2927	0.0789	-1.6688	-0.3792	1.0456	-0.9916	0.1961	1.4717	-0.8356	0.1441	-0.4418	0.3594	0.2882	0.264	0.7171	0.8131	1.4647	-1.0532	0.55	-0.3365	0.0062	-0.1597	0.1519	0.3537	0.4274	1.1124	2.1721	1.3194	-0.4584	0.052	-0.8041	-0.2165	-0.7984	-0.2814	0.57	-0.7472	0.2363
112734	-0.0673	-0.17	-0.1525	-0.1296	-0.2574	0.2845	0.2667	-0.1408	-0.5007	-0.3482	-0.0414	0.2494	-0.1073	0.1721	0.0079	-0.02	-0.2189	0.2493	-0.0581	-0.4929	-0.1099	0.2011	-0.049	0.0808	-0.1624	0.2273	0.2005	0.3803	-0.0367	0.1993	0.0811	0.2114	-0.0466	0.2277	-0.0028	0.4188	-0.2642	0.4525	0.0364	0.0938	-0.0847	-0.0265	0.1251	-0.0656	-0.0401	0.2476	-0.04	-0.1475	0.4852
112738	-0.3692	-0.5657	-0.4306	0.211	-0.0954	0.0947	0.1092	0.1097	-0.2864	0.5691	0.1508	-0.1606	0.0587	-0.0671	0.4975	-0.2996	-0.0734	-0.1742	0.3307	-0.1003	-0.1707	-0.258	-0.1017	0.0985	-0.0368	0.3103	0.129	0.1054	-1.1292	-0.1072	-0.0304	-0.012	0.2375	-0.1952	0.2802	-0.0627	0.1716	0.0405	0.2902	-0.1889	-0.4635	0.2101	0.0258	0.2495	-0.6661	-0.1223	0.4142	-0.2098	0.167
112763	-0.1358	0.3149	0.4677	-0.0707	-0.3358	-0.5631	-0.3257	-0.3674	-0.3086	-0.7082	-0.0033	-0.105	0.0452	0.0434	-0.3848	0.1633	-0.1513	0.0711	-0.4035	-0.2295	0.0384	0.1343	0.0191	0.1024	-0.0187	-0.4175	0.0151	-0.3151	-0.2244	0.4807	-0.0303	0.1863	0.1642	0.2534	0.2025	0.3661	-0.4364	-0.4497	-0.6703	0.1224	0.5037	-0.3439	-0.1397	-0.4876	0.094	-0.4481	-0.2109	-0.0674	-0.1791
112767	0.4606	0.0741	0.1004	-0.4756	-0.0714	0.1001	-0.0226	-0.7	-0.2298	-0.2517	-0.0873	-0.8406	-0.1188	0.1632	-0.1075	-0.1258	-0.3403	-0.3113	-0.7116	-0.2513	0.2222	-0.2816	-0.0373	0.848	-0.0292	-0.0485	0.4084	-0.0055	-0.1263	0.1194	0.796	0.2691	0.261	0.0229	-0.1537	0.0272	-0.2805	-0.4056	-0.3924	0.255	0.4787	0.242	-0.1067	0.3861	-0.1178	-0.0971	-0.1622	-0.17	-0.3527
112769	0.4744	-0.684	-0.3491	-0.3059	-0.4408	0.029	0.0376	-1.1337	-0.511	-0.1447	0.0978	-0.392	-0.1334	0.1058	0.0852	0.1512	-0.3634	-0.725	-0.789	0.209	-0.0442	-0.1724	0.055	0.4231	0.1832	-0.0019	-0.0218	-0.6063	0.1326	-0.2255	0.0367	0.251	0.1765	0.2994	-0.0032	0.3273	-0.5545	0.0871	-0.0745	-0.3204	-0.1595	0.3867	-0.1293	-0.2124	0.2676	0.2559	-0.0713	-0.3008	0.4316
112771	-0.5004	-0.5968	-0.076	-0.1093	-0.1749	0.5414	-0.124	-0.1444	-0.0434	-0.2561	0.2963	-0.0089	-0.146	-0.2214	0.3003	-0.2566	0.2008	-0.1802	0.2365	-0.2794	-0.4346	0.1098	-0.2091	0.0433	-0.3984	0.1538	0.0106	0.3182	0.518	0.3997	-0.0838	0.1784	0.3707	0.118	0.182	0.8997	-0.2124	0.4597	-0.1092	0.0335	-0.3466	0.2976	-0.1426	0.397	-0.1009	-0.1004	-0.0365	-0.3707	1.0806
112773	-0.1562	0.8185	0.6852	0.1983	-0.1625	-0.3714	-0.3408	-0.1078	0.216	-0.4477	0.0433	0.6002	0.0097	-0.0782	-0.4538	0.1472	0.1486	-0.2728	0.1672	-0.285	0.3498	-0.151	-0.1603	-0.3388	-0.4415	-0.0466	0.034	0.3682	0.2029	0.1529	-0.4504	-0.3514	-0.0688	0.15	-0.1469	0.1965	0.0371	-0.54	-0.4277	-0.2736	0.4259	-0.5825	-0.1579	-0.4584	-0.079	-0.1179	-0.3068	0.2042	0.0836
112798	-0.0622	-0.1315	0.204	-0.0346	0.0513	-0.324	-0.1233	-0.3972	-0.1776	-0.2073	-0.0196	-0.1911	0.1703	0.0418	-0.0832	0.0356	-0.0504	-0.1981	-0.2368	-0.1317	0.0908	0.0754	-0.143	-0.1909	0.1848	-0.1028	0.0504	0.0057	0.1986	0.1824	0.4152	-0.1839	-0.0354	0.2905	-0.0367	-0.0393	-0.4057	-0.043	-0.1085	-0.001	0.0569	-0.0732	0.1649	-0.1635	0.2425	-0.4448	-0.2471	0.0398	-0.3634
112800	-0.0193	0.7636	0.0631	0.5119	-0.7093	-1.0185	-0.6736	0.1227	0.3126	0.1846	-0.0015	0.7848	-0.1917	-0.4318	-0.1395	-0.1632	-0.5114	0.2158	0.1978	-0.4326	-0.191	-0.0885	-0.5096	-0.0989	-0.4422	-0.3742	-0.4506	-0.8252	0.4437	-0.3449	-0.3312	-0.8225	0.1176	-0.3162	-0.0847	0.4767	0.2463	-0.2242	-0.1706	-0.8255	0.4014	-0.3068	-0.1202	-0.1491	-0.3913	-0.4704	-0.2171	0.089	0.1958
112810	-0.0214	-0.5268	0.4092	-0.0407	-0.1545	0.4767	-0.0106	-0.4036	-0.198	-0.22	0.1203	-0.0268	-1.0746	-0.3404	-0.0424	0.1332	0.6301	-0.4243	-0.1285	-0.2123	0.2998	0.1605	-0.0531	0.3979	-0.0362	0.185	-0.3879	-0.2499	0.5334	0.2736	-0.0648	0.0826	0.088	-0.0243	-0.1673	0.0628	-0.5207	0.716	0.0317	-0.1111	0.6696	0.507	0.2075	-0.0764	0.3652	-0.0999	-0.5672	-0.231	0.5831
112829	-0.2526	0.2965	0.4977	-0.0456	0.178	-0.7895	0.1406	-0.1387	-0.0812	-0.6897	0.3442	0.19	0.5115	0.1467	-0.192	0.2918	-0.2425	-0.0147	-0.6547	-0.3359	0.4467	0.5263	-0.108	-0.3994	-0.0068	-0.1979	0.6057	0.0632	-0.5662	0.4296	0.1619	0.2645	-0.0288	0.317	0.0968	0.18	-0.5427	-0.0784	-0.0139	0.477	0.3693	-0.0094	0.0658	-0.342	0.0442	-0.286	0.1675	0.2194	-0.6702
112846	-0.3429	-0.7483	-0.3364	-1.0043	-0.0334	0.0604	0.1238	-0.0612	0.2008	0.2344	-0.6849	-0.6402	-0.8358	0.4686	-0.1744	-0.3708	0.3923	-0.9512	0.2108	-0.3522	0.0878	-0.1047	0.1853	0.7684	0.0382	0.3111	-0.5981	0.5515	0.9783	-0.38	0.971	-0.2553	-0.0497	-0.0621	-0.7613	0.0876	-0.3388	0.2456	0.417	0.1953	-0.004	0.1283	-0.1151	0.4757	0.7813	0.1834	-0.2026	-0.6551	0.3323
112855	-0.1785	0.8789	0.4722	0.1289	-0.1238	-1.0107	-0.3196	-0.171	0.4513	-0.8462	0.2573	0.1131	0.1701	0.127	-0.5327	0.2332	0.1198	0.2975	-0.1784	-0.1403	0.2954	-0.1332	-0.3354	-0.1357	-0.4585	-0.994	-0.0613	-0.4648	-0.6739	0.7378	0.1778	-0.0547	-0.4943	0.1104	0.4185	0.6186	-0.3246	-0.5415	-0.2495	0.1048	0.7055	-0.4341	-0.1226	-1.1274	0.5885	-0.6239	-0.4248	0.1733	-0.6436
112861	0.0436	0.5602	0.7985	0.3075	-0.0903	-0.4268	-0.2686	-0.2324	-0.5009	0.0038	-0.0648	-0.0532	0.0709	-0.2366	-0.2332	0.3233	0.0826	-0.0287	-0.4051	-0.5095	0.1057	-0.1007	-0.2221	-0.4375	0.0538	-1.0375	-0.2815	-0.5416	-0.3056	0.5759	-0.3079	0.0398	-0.2339	0.2283	0.4415	0.5078	-0.3041	-0.9677	-0.3908	0.2083	0.5371	-0.5963	-0.3337	-0.4412	-0.1186	-0.7976	-0.2756	0.1176	-0.6502
112880	-0.0255	-0.1793	-0.3177	-0.1162	0.0736	0.3134	0.1417	-0.2206	-0.2236	-0.1022	-0.0286	-0.0144	-0.0659	0.1227	0.0389	0.269	-0.2242	0.0566	0.1639	0.042	-0.0493	0.0063	0.18	0.3807	0.104	0.3958	0.2695	0.1273	-0.0152	-0.0356	0.2773	-0.0427	0.1726	0.1302	-0.1224	-0.1862	-0.1568	0.3896	-0.1585	0.0208	-0.0406	0.0065	0.0837	0.1463	0.3961	0.49	0.2288	-0.3028	0.0374
112888	0.4757	2.2553	0.7163	-0.907	-0.2495	-0.6543	-0.4243	0.5517	0.1966	-0.3132	-0.392	1.1085	0.0238	-0.2229	0.2524	0.2818	0.343	0.9967	0.3975	-0.7209	0.1053	-0.4386	-0.6377	-0.2602	-0.1332	-2.5061	-1.0174	0.3338	-0.0752	-0.2149	-0.9507	-1.0632	0.0394	0.0053	-0.6636	-0.8912	0.8813	-1.3948	1.4464	-1.0116	0.7515	-0.6622	-0.4641	-0.2428	0.0685	-1.1978	-1.0712	0.5655	-0.4692
112894	-0.0902	0.7285	0.5054	-0.2463	0.1262	-0.2772	-0.5425	0.1112	-0.181	-0.6322	0.5147	0.0395	-0.0292	-0.1298	-0.6629	0.0426	-0.1627	0.3668	-0.1405	-0.0101	0.195	-0.249	-0.1972	-0.1052	-0.9265	-0.1563	0.0294	-0.5236	-0.7022	0.3576	-0.2014	0.1355	0.3436	0.277	0.0454	0.2356	0.0506	-1.0102	-0.548	0.2504	0.7313	-0.3944	0.0562	-1.0342	0.7475	-0.5705	-0.4506	0.1649	-1.0805
112902	-0.0817	0.3889	0.3756	0.1453	0.1574	-0.8445	-0.2402	0.1133	0.1915	-0.6189	0.1268	-0.1961	0.2913	0.0498	0.1391	0.2738	0.0035	0.7545	-0.1209	0.0801	0.1777	-0.283	-0.2061	-0.1944	-0.2335	-0.7694	-0.2274	-0.3038	-0.8673	0.2983	-0.1888	-0.1118	-0.1284	-0.1329	0.603	-0.056	-0.0935	-0.986	-0.585	-0.0512	0.5416	-0.579	0.0452	-0.6778	0.1324	-0.5147	-0.3326	0.203	-0.8501
112908	-0.1915	-0.026	-0.1545	0.2259	-0.0069	-0.077	-0.1893	-0.2305	-0.0555	0.1118	0.1152	0.0635	0.0303	-0.024	-0.0285	-0.2469	0.0247	0.0009	0.0753	-0.0869	-0.0605	-0.079	-0.2301	-0.0623	-0.1201	0.1622	-0.0229	0.5265	0.3265	0.1439	-0.2224	0.0225	0.015	0.2446	0.1784	0.3069	-0.1031	0.0951	-0.1034	-0.249	0.0868	0.1665	-0.0654	0.0466	-0.0771	-0.0217	-0.081	0.0781	0.381
112918	-0.5776	-0.1854	0.0241	0.129	-0.1106	0.3261	0.5773	0.0079	-0.0692	0.0362	0.7107	0.309	-0.1334	0.1536	-0.4104	-0.5103	-0.0245	-0.2298	0.4623	-0.1905	-0.6544	0.2809	-0.0128	0.1318	-0.2722	0.0114	0.5032	0.1735	0.4851	-0.25	0.1735	0.0619	0.6349	-0.0427	0.1504	0.3505	0.1579	0.3879	-0.0366	-0.0617	-0.5241	-0.1985	-0.0124	0.4436	-0.0541	0.3141	0.0212	-0.2905	0.3083
112923	0.0577	0.3233	0.0574	0.0969	-0.1383	-0.0046	-0.2263	-0.0469	0.2446	0.1049	0.1069	0.1829	-0.1526	-0.0918	0.2751	-0.3213	0.0848	-0.2848	-0.0514	-0.0941	-0.0516	0.1579	-0.075	0.0577	-0.2098	-0.2117	0.1358	0.1988	0.3399	0.1274	0.0577	-0.0116	0.1923	0.0591	0.0267	0.6292	-0.1	-0.0119	0.2053	-0.091	-0.0135	0.0005	-0.2878	0.0905	0.1206	-0.1976	-0.2538	-0.1238	0.7835
112927	-0.1837	1.0156	0.7845	-0.0529	-0.1754	-0.6477	-0.2412	-0.3849	-0.3805	-0.6239	0.2548	-0.0557	0.2399	-0.2094	-0.5388	0.1346	0.2013	0.171	-0.3173	-0.2837	0.0978	-0.188	-0.1645	-0.2713	-0.1266	-0.8919	-0.0591	-0.3306	0.1391	0.6004	-0.2264	-0.0379	0.0258	0.1492	0.248	0.2992	-0.0181	-0.7552	-0.395	0.2356	0.5601	-0.5481	-0.1165	-0.4024	-0.0237	-0.6527	-0.4116	0.0784	-0.7025
112934	0.8537	0.6349	0.4873	0.1788	-0.0943	-0.6942	-0.0504	-0.0645	0.0475	-0.1869	0.3476	-0.1441	0.4063	-0.2002	-0.0305	0.4011	0.3815	0.2365	-0.1947	0.2275	0.4053	-0.0213	0.8315	0.0669	-0.0332	-0.5917	-0.0788	-0.3679	-0.0236	0.2551	-0.0348	0.0734	-0.3802	0.1475	0.2136	-0.0617	0.0923	0.0037	-0.3061	-0.233	0.4575	-0.4634	-0.1598	-0.419	0.0211	-0.1681	0.1574	0.4516	-0.4265
112942	1.4109	0.0625	1.2526	-1.2324	0.1576	1.3202	0.2668	0.3822	0.1318	-1.2394	-0.7744	-0.4884	0.1861	0.9575	-0.1447	0.5159	-0.7321	-0.4858	-0.5647	-0.2592	0.3425	0.0288	-0.4171	1.6608	0.2499	0.0932	0.6167	-1.3174	0.3568	0.6119	0.1966	-0.0023	-0.2069	-0.3779	-1.0828	0.0429	-1.3661	0.4072	-0.3061	-0.2333	0.5927	-0.4856	0.5134	0.1983	-0.1902	0.8459	-1.5544	-0.3609	0.2139
112953	-0.3556	0.1299	0.3575	0.5001	0.1259	0.3371	0.3151	-0.5814	-0.6116	-0.6937	0.2286	-0.3724	0.7522	-0.2014	-0.3893	-0.1464	0.1741	0.013	-0.068	0.0064	0.3716	0.5109	0.0781	-3.7174	-0.0364	-0.1983	0.4624	-0.4124	-0.3747	0.9627	-0.0282	0.8205	0.253	0.2848	0.163	0.3778	-0.4487	-0.0592	-0.8261	0.7101	0.2279	-0.6317	-0.154	-0.1689	-0.4436	-0.3688	0.5403	0.0985	-0.3383
112985	-0.1242	0.4437	0.9347	0.2338	0.1487	-0.6681	-0.1815	-0.4668	-0.2949	-0.8372	0.1223	-0.4459	0.2225	-0.0448	-0.1008	0.2789	-0.1117	0.3762	-0.0106	-0.7067	0.3961	-0.214	0.0167	-0.2004	-0.03	-1.1462	-0.0236	-0.5022	-1.0897	0.8558	-0.1038	0.2497	-0.1632	0.3688	0.3609	0.3733	-0.3615	-0.8884	-0.8153	0.2133	0.5742	-0.9047	-0.0734	-0.682	-0.1323	-0.6869	-0.375	0.1923	-0.5695
113019	-0.1059	0.1308	0.6341	0.0376	0.0478	-0.6534	-0.2988	-0.5833	-0.3447	-0.6242	-0.0186	-0.3656	0.1322	0.2053	-0.0977	0.1495	-0.0025	-0.0411	-0.3729	-0.2518	0.1698	-0.1327	-0.1104	-0.0043	0.0963	-0.5154	-0.0544	-0.3591	0.0695	0.5833	0.0627	0.1373	0.1989	0.087	0.2777	0.2795	-0.4103	-0.525	-0.5368	0.1642	0.4038	-0.4516	-0.0383	-0.4578	-0.0469	-0.6963	-0.1371	-0.0101	-0.5355
113024	-0.0104	0.4221	0.2581	-0.1992	0.11	-0.5404	-0.0801	-0.1481	0.1121	-0.2628	0.0084	-0.3755	0.108	0.2576	-0.0701	0.4101	0.1776	-0.4358	-0.6065	-0.0698	0.2084	0.1159	-0.2364	-0.2008	-0.0928	-0.2609	-0.0155	-0.0368	0.1461	0.496	-0.0047	0.172	-0.4669	0.0708	0.3788	0.3253	-0.2173	-0.5231	-0.5197	0.2687	0.3687	-0.256	-0.2267	-0.2875	-0.1124	-0.4482	-0.1115	-0.0612	-0.1144
113038	0.8829	-0.2875	-0.13	-0.1523	0.3308	0.1619	0.5516	0.7446	0.1781	0.9221	-0.1661	-0.1656	-0.1468	0.0572	0.5302	0.2581	0.2884	0.237	0.5571	0.4021	0.6375	0.1883	0.1618	-0.1473	0.6108	0.5762	0.1124	0.2332	0.548	-0.4134	-0.0674	-0.3818	-0.5609	-0.5414	-0.4959	-0.6387	0.2626	0.8908	0.4063	-0.0917	-0.2398	0.6076	0.3174	0.2888	0.4234	0.7616	0.0903	-0.0117	0.0169
113045	-0.1227	-0.7009	-0.543	0.3584	0.129	0.3675	0.2429	-0.3571	-0.3885	-0.0955	0.4802	0.2228	-0.0051	0.2786	0.1691	-0.0794	-0.109	0.2057	0.4761	-0.0074	-0.088	0.3625	0.2421	0.0132	0.2048	0.3551	0.3997	0.2825	-0.5614	0.2924	-0.2056	0.3515	-0.0193	0.2303	0.3908	0.0144	-0.2528	0.429	0.0842	-0.0847	-0.2299	0.4076	0.0254	0.454	-0.1163	0.6521	0.2406	0.283	0.2532
113047	-1.5945	-0.5293	-2.5834	-2.0799	0.4586	1.0998	-1.8343	0.4839	0.075	0.7503	0.6741	-1.5545	-2.133	-1.975	0.9025	0.4492	0.5896	0.814	1.4154	0.2152	0.0462	-0.4742	-0.3097	0.4543	-2.5495	0.5554	-0.3096	0.4926	1.6502	-2.0081	-1.7268	-1.8987	0.3139	0.0967	-1.6525	-2.126	1.0185	0.7293	1.0368	-0.3532	0.0269	1.4552	0.2427	-1.6623	-0.3306	-1.7007	0.8262	-0.0852	1.2743
113059	0.3041	0.5394	-0.0688	-0.1996	0.1005	0.4491	-0.2936	-0.2563	-0.2366	-0.128	-0.0326	0.5634	-0.7379	-0.0938	-0.2985	0.3647	-0.4664	-0.3853	0.2998	0.259	0.1638	0.0489	0.1302	0.1318	0.2202	0.563	0.6538	-0.3866	-0.052	0.2711	-0.2779	0.571	0.7776	0.0118	-0.5425	0.8927	0.3157	0.4159	0.0546	-0.1075	-0.0811	-0.09	-0.8054	0.3691	0.423	0.2503	0.0339	0.3364	-0.0962
113071	0.1821	0.353	0.1585	0.2761	-0.36	0.0106	-0.2679	0.0503	0.1734	-0.139	0.3246	0.2287	0.2167	-0.1543	-0.055	-0.0096	0.1841	-0.3257	-0.152	-0.3086	0.1364	0.0995	0.0693	-0.1129	-0.5145	-0.2144	0.155	0.2235	0.0831	0.2873	0.2481	0.0014	0.2696	0.276	0.0561	0.5003	0.1852	-0.3304	-0.0177	-0.1486	0.1933	-0.147	-0.1653	0.1464	0.0076	-0.1411	-0.0743	0.047	0.4409
113090	-0.0888	-0.0809	-0.3774	0.0336	-0.2133	0.4738	0.037	0.5979	0.2443	0.5985	0.128	0.0932	-0.0389	-0.1679	-0.1333	-0.3845	0.2257	-0.1455	0.2083	0.202	-0.365	-0.1373	-0.2091	-0.0933	-0.2354	0.2608	-0.1501	0.2716	0.554	-0.4441	0.1057	-0.1116	0.1955	-0.3931	0.0108	-0.0887	0.256	0.4622	0.5268	0.1059	-0.3634	0.4199	-0.0359	0.2155	-0.1892	-0.0622	0.2196	0.0492	0.2586
113095	-0.762	-0.3742	-1.4807	0.5447	0.0412	0.0927	0.2267	-0.1551	-0.4317	0.3573	0.0355	0.1775	0.1706	-0.193	0.2505	-0.4055	-0.2049	0.054	0.5794	0.0286	0.4495	-0.4987	-0.303	0.0692	0.057	0.1201	-0.3416	0.5311	0.259	-0.7094	-0.6209	0.0092	0.2435	0.0142	0.5033	-0.425	0.2165	0.0918	0.3969	-0.0994	-0.5068	0.5121	-0.1382	-0.0072	-0.214	-0.1333	0.3208	0.179	0.4086
113096	0.3993	-0.7144	-0.1231	0.1347	0.3049	-0.2059	0.6966	0.3563	-0.396	0.748	-0.4394	-0.2952	-0.2411	0.1296	0.8289	0.4908	-0.2015	-0.2081	0.018	0.0423	0.4973	-0.0689	0.6705	0.1263	0.1116	0.8322	-0.137	-0.291	0.4643	-0.6835	-0.3898	-0.6013	-0.5146	-0.485	-0.5884	-0.6132	0.4203	-0.4014	-0.1777	-0.006	-0.0518	-0.0097	0.6804	0.2113	0.7256	0.7975	0.1199	-0.285	-0.4858
113098	0.1227	0.9271	0.4783	-0.2501	0.392	-0.4499	-0.5767	-0.0584	-0.0714	-0.5159	-0.03	-0.1905	-0.3883	-0.0992	-0.0491	0.0568	-0.1796	0.1103	0.2833	0.04	0.0859	-0.079	-0.0448	-0.0731	0.0954	-0.9155	0.0165	-0.6938	-0.1523	0.5486	-0.7316	0.238	0.6047	-0.1057	-0.0661	0.5944	0.0159	-0.9506	-0.1865	0.3374	0.1501	-1.0165	-0.6224	-0.5556	-0.0404	-0.608	-0.084	0.0192	-0.6647
113110	-0.0409	-0.0888	-0.3193	-0.1294	-0.2353	0.4715	0.6159	0.338	-0.1255	0.5184	0.4108	-0.2677	0.0961	0.1102	0.8009	-0.0372	0.4595	0.5792	0.6546	0.1042	0.4714	0.2612	-0.0018	-0.0567	0.2085	0.0886	0.4274	0.4093	0.1387	0.3597	-0.1391	0.1642	-0.4035	-0.2515	0.0931	-0.3704	0.4729	0.7496	0.4669	0.0116	-0.7074	0.5887	0.031	0.3954	0.352	0.7689	0.0725	0.3126	0.3349
113118	0.3783	-0.2332	-0.3084	0.0086	0.0321	0.0663	0.2598	0.4446	-0.3136	0.2479	-0.2885	-0.0388	-0.0565	0.0406	-0.0079	-0.1579	-0.1841	-0.1945	0.2009	1.4539	0.5743	-0.1799	-0.0758	-0.0639	0.3344	0.3723	0.0934	0.2282	0.733	-0.1226	-0.0228	-0.1014	-0.3367	-0.4484	-0.503	-0.5876	0.0647	0.3347	-0.352	0.1703	-0.0376	0.5372	-0.0044	-0.0506	0.2416	0.7668	0.046	0.1251	-0.3882
113121	-0.5235	-0.7382	-0.6611	0.0291	-0.1355	0.3549	-0.0743	0.2174	-0.1102	0.3485	0.1643	0.1262	-0.2094	-0.2704	0.0578	-0.49	-0.1084	-0.0207	0.3496	-0.0905	-0.4791	-0.1948	-0.3507	-0.0876	-0.4624	0.1299	-0.1481	0.0505	-0.6168	-0.2866	-0.4939	-0.1325	0.1897	-0.3448	0.3465	-0.4354	0.4254	0.0322	0.2614	-0.3642	-0.5107	0.2189	-0.1926	0.2486	-0.334	-0.0903	0.0028	-0.3217	0.2893
113125	0.1779	-0.3692	-0.2512	-0.309	0.1512	0.4132	0.502	0.0129	-0.5631	0.4703	0.4425	0.0057	-0.0151	0.2442	0.3812	0.108	-0.4274	0.2472	0.3524	0.3304	0.679	0.4072	0.3958	0.1622	0.6552	0.3605	0.3464	-0.2613	0.4605	0.0411	-0.0032	0.2059	0.1178	-0.4504	-0.3313	-0.6785	-0.1584	0.4708	-0.0004	0.549	-0.1786	0.1847	0.2077	0.638	0.0921	1.1166	0.3396	0.2804	-0.0351
113149	-0.3468	-0.1684	-0.8626	0.1527	0.093	0.0917	-0.2555	1.6291	0.6902	1.0402	-0.3095	-0.0614	0.0694	-0.4935	-0.0051	-0.2353	-0.0142	0.5348	0.5991	0.6529	-0.4632	-0.8414	-0.4168	-0.5561	-0.5153	-0.3543	-1.0751	0.6036	0.0374	-0.8505	-0.4911	-0.9132	-0.4834	-0.7665	0.1467	-0.2139	0.7131	-0.1586	0.4082	-0.5699	-0.0853	0.6335	-0.0036	-0.0135	-0.5343	-0.54	-0.2342	-0.2914	-0.3471
113154	0.3617	-0.2004	-0.5161	0.2512	0.5436	0.2155	0.7572	0.7725	0.0255	0.7504	0.1895	0.1152	0.1915	0.1686	0.3636	0.0098	0.1182	0.2966	0.6512	0.7284	-0.0751	0.0763	0.5339	-0.1629	1.0121	0.2585	0.5031	-0.2212	0.1254	-0.2048	0.2849	-0.0731	-0.0635	-0.4846	-0.2231	-1.1171	0.0681	0.4736	0.8429	0.1511	-0.4781	0.1919	0.2827	0.4695	-0.0482	0.6095	0.1823	-0.1437	-0.272
113157	0.602	0.2296	0.004	-0.2387	-0.0054	0.0665	-0.0586	0.0608	0.0563	0.1941	-0.2023	-0.4987	-0.6759	0.2408	-0.1953	0.1419	-0.2984	-0.0616	-0.1862	0.1266	-0.4866	0.0654	0.0033	0.1594	-0.0991	0.1948	-0.1104	-0.2007	0.3733	-0.3205	0.3742	0.0077	0.4377	-0.1783	-0.6308	0.3378	0.1784	0.231	0.0901	-0.0485	-0.1273	0.022	0.0904	0.0812	-0.0618	0.0392	-0.2294	-0.3878	0.2002
113190	0.2378	-0.4799	0.4795	-0.6361	-0.0727	-0.1121	-0.3163	-0.7428	-0.1201	-0.0547	-0.6977	-0.2437	-0.3127	0.5056	-0.1987	0.1046	-0.17	-0.8283	-0.8932	-0.109	-0.0568	-0.0453	0.1901	0.4672	0.2172	0.4287	-0.1386	-0.6031	0.0605	-0.3146	0.6107	0.0422	-0.0466	0.2255	-0.5135	0.1911	-0.6382	-0.1598	-0.3817	-0.0115	0.2762	-0.0606	0.0653	-0.1384	0.2568	0.1821	0.0223	-0.5762	0.2852
113197	1.5156	-0.303	-0.3519	-0.5703	0.4729	0.6069	0.2581	0.5453	0.6028	0.808	-0.749	-0.6067	-0.2154	-0.0696	0.3506	0.5468	0.1645	0.3018	-0.122	-0.0005	0.4535	0.0396	0.7742	0.1776	1.1431	0.8584	0.2356	0.2978	0.1731	-0.6028	0.3675	-0.4028	0.02	0.0199	-0.2032	-0.7092	0.3801	0.2443	-0.0856	-0.1811	-0.1897	0.1704	0.3643	0.2901	0.7767	0.582	-0.3668	-0.4675	-0.0608
113212	-0.1721	0.0454	-0.3564	-0.2702	-0.1072	0.2862	-0.1302	-0.1423	0.1786	0.0048	-0.2018	0.0832	-0.3673	-0.0076	0.1632	-0.2494	-0.3001	-0.3733	-0.3429	-0.3473	-0.2729	0.2332	0.0374	0.0972	0.0409	0.3161	-0.0154	0.482	0.7335	-0.1742	0.6238	0.3398	-0.0542	0.1205	-0.7403	0.1233	0.1219	0.4736	0.0638	-0.094	0.5239	0.0465	-0.0669	0.5154	0.2938	0.4874	-0.2829	-0.1746	0.5276
113230	-0.4078	-0.067	-0.1089	0.14	-0.2586	0.3406	-0.0948	0.1338	-0.0781	0.079	0.2406	0.0922	-0.0935	-0.2073	-0.4402	-0.3768	0.0348	-0.1519	0.1338	-0.1276	-0.2705	-0.0985	-0.2715	-0.1898	-0.4797	-0.1472	0.0769	0.3579	0.0664	0.0335	-0.0821	0.2204	-0.0007	0.0947	0.1665	0.041	-0.0773	0.1933	0.1113	0.1244	-0.1896	0.3239	-0.2656	0.1334	-0.2278	-0.0938	-0.215	-0.1003	0.0396
113244	-0.1791	0.3316	0.5683	-0.0109	-0.0001	-0.662	-0.2348	-0.6214	-0.4233	-0.7736	-0.0193	-0.3983	0.1217	0.1693	-0.3455	0.0914	-0.341	0.122	-0.4941	-0.414	0.2296	-0.1762	0.1296	0.0465	0.1492	-0.3789	0.2228	-0.5521	-1.3836	0.6374	0.1095	0.3142	-0.0132	0.2041	0.3554	-0.0064	-0.3213	-0.7169	-0.81	0.2991	0.4146	-0.9082	0.1023	-0.4856	0.2845	-0.3968	-0.0128	0.0474	-0.6684
113258	-0.1668	-0.5711	-0.6118	0.4154	0.5598	-1.0615	-0.0672	0.6553	-0.5178	0.7644	0.1069	-0.6443	0.5933	0.1127	0.7757	0.0401	-0.7583	0.6385	0.4397	0.1716	0.0906	-0.213	0.7851	0.1314	0.4758	0.3282	-0.3689	-0.7097	-2.3679	-0.4844	0.3191	-0.3766	-0.5339	-0.5597	0.6191	-0.8066	0.5289	-2.0509	0.3326	0.011	0.2345	-0.3145	0.3418	-0.3188	-0.687	-0.7516	0.5412	-0.0289	-1.1912
113260	-0.2567	-0.5645	-0.7908	0.4133	-0.137	0.2852	0.0641	0.7861	0.1286	0.9768	-0.1576	0.1097	-0.3121	-0.2261	0.3643	-0.4366	0.3604	0.0418	0.6788	-0.0538	-0.274	-0.3022	-0.4529	-0.2246	-0.1967	0.4829	-0.3394	0.3245	-0.3359	-0.6955	-0.4032	-0.4793	0.0344	-0.8152	0.0544	-0.623	0.7074	0.2227	0.6849	-0.5779	-0.5449	0.6202	-0.0565	0.2844	-0.719	0.2921	0.225	-0.4332	0.3517
113291	-0.1445	0.0536	0.5441	0.2106	-0.1032	-0.2657	-0.2123	-0.4605	-0.4557	-0.591	0.0235	-0.2767	0.0812	0.0543	0.0266	0.2264	0.1657	-0.2794	-0.7384	0.1522	0.1415	-0.288	-0.218	-0.1341	-0.1365	-0.4547	-0.1277	-0.303	0.0792	0.5173	0.2974	0.0151	-0.2195	0.2931	0.3158	0.3534	-0.523	-0.3208	-0.199	0.4182	0.6006	-0.2975	-0.0196	-0.2208	0.427	-0.7907	-0.08	0.5485	-0.5577
113302	0.0761	-0.1362	-0.1923	0.0217	-0.2734	0.1217	0.009	-0.1533	0.054	0.2345	0.3736	-0.0694	0.0537	0.0156	-0.039	-0.2492	-0.0566	-0.1741	-0.1282	0.408	-0.4259	0.1714	0.0298	0.1391	0.1903	0.1577	-0.0497	0.3178	-0.5304	0.1419	0.314	0.1782	0.3312	0.142	0.0293	0.2044	-0.026	0.0521	0.5305	0.0989	-0.1584	-0.1461	0.0817	0.2472	-0.0768	-0.0065	-0.0558	-0.2396	0.3141
113335	-0.3901	-0.4884	-0.5459	0.1279	-0.0651	0.2876	0.1253	0.1204	0.0051	0.3941	0.3152	0.2707	0.2238	-0.0863	0.1067	-0.1904	0.2331	-0.0752	0.436	0.0818	-0.1932	0.0413	-0.0112	-0.0246	-0.152	0.3337	0.2698	0.2486	0.2508	-0.062	0.0619	-0.045	0.1329	-0.0476	0.2845	-0.1729	0.0943	0.4696	0.3262	-0.3847	-0.5199	0.3911	-0.2008	0.3543	-0.455	-0.2116	0.2665	-0.135	0.2527
113338	0.0814	-0.6267	-0.061	-0.1236	0.1022	-0.0906	-0.0569	-0.7908	-0.2191	-0.6119	0.2595	-0.1126	0.0011	0.2427	0.1319	-0.0373	-0.4622	-0.2405	-0.3069	-0.2967	-0.3064	0.1535	0.491	0.5044	0.276	0.4133	0.1269	-0.5544	-0.4964	-0.1071	-0.0632	-0.1706	0.1714	0.3058	-0.1304	0.479	-0.3358	-0.2621	-0.973	0.1149	0.0016	-0.6196	0.4094	0.1287	0.3602	0.3932	0.0973	-0.3805	0.1015
113347	-0.0458	-0.7549	-0.6958	0.2772	0.4021	0.154	0.4641	0.3503	-0.5229	0.6032	0.086	0.1375	0.4458	0.0949	0.6143	-0.2361	0.5641	0.3514	0.5485	0.1386	0.4217	0.1369	0.3175	-0.2231	0.3472	0.4004	0.0443	0.1403	0.2056	-0.3887	-0.4951	0.1818	0.4416	-0.3098	0.2453	-0.1682	0.0863	0.4441	0.5845	-0.2061	-0.2588	0.8441	0.0395	0.2278	0.1638	0.6446	0.4832	0.2301	-0.183
113356	-0.1516	-0.0282	0.215	0.1796	0.6559	-0.0111	0.2547	-0.4207	-0.7793	-0.2894	-0.0028	0.3298	0.1444	-0.1643	0.1315	-0.0638	0.4327	0.1986	0.408	-0.0497	0.2372	0.3569	-0.2198	0.0788	-0.2463	0.2068	-0.4125	0.5237	0.7462	-0.0936	-0.5457	0.1392	-0.14	-0.0587	0.1845	0.1955	-0.4929	0.5582	0.2328	0.0419	-0.0477	0.2127	-0.2231	0.2126	-0.1029	0.3059	0.2105	0.1004	0.5851
113380	0.0368	-0.2539	-0.1703	-0.2191	-0.1834	0.6004	-0.0731	-0.0952	0.3483	0.1494	0.1873	0.1232	-0.0153	0.0196	-0.3332	-0.1819	-0.3711	0.125	-0.2343	-0.1851	-0.0705	-0.1177	0.1731	0.1931	0.1047	0.2225	-0.1495	0.141	0.2559	-0.276	0.5202	0.0491	0.3041	0.0053	0.0259	0.0085	0.0581	-0.0106	-0.3188	-0.0312	-0.2345	0.2566	0.0115	0.238	0.1396	-0.275	-0.366	-0.2116	0.3461
113393	-0.1107	-0.518	0.3172	-0.3629	0.0803	0.0696	0.2009	0.8201	0.4338	0.5288	0.2212	0.3783	0.4446	0.204	-0.3718	0.153	0.5735	-0.6739	-0.0967	0.1151	-0.2509	0.4773	0.2193	0.2455	-0.1857	0.1563	0.2594	0.847	0.4891	-0.037	0.4808	0.1338	-0.2655	0.2082	0.0823	0.6341	0.3531	0.4554	0.3637	0.3486	-0.4034	0.4206	-0.0875	0.2331	0.462	0.351	0.021	0.3295	0.406
113409	0.0668	-0.1106	-0.5027	-0.2177	0.2183	0.4659	0.065	0.2985	0.4612	0.4915	0.1668	0.2354	0.0721	-0.2447	-0.4804	-0.1797	-0.3	-0.0605	0.0868	0.1118	-0.3094	-0.1637	0.1342	-0.0117	-0.1012	0.2391	-0.1865	0.2793	-0.3402	-0.282	0.1392	-0.3595	0.0724	0.036	-0.0459	-0.0335	0.482	-0.082	0.0375	-0.2786	-0.2799	0.4266	0.0171	0.2281	0.246	0.2739	-0.0689	-0.003	0.406
113421	-0.7415	-0.1316	-0.5528	-0.4851	-0.0167	0.476	-0.0525	-0.1346	-0.2454	0.0527	0.0439	-0.0271	0.1945	-0.2243	-0.013	0.4664	-0.6827	-0.4798	-1.0579	0.322	0.2044	-0.2547	0.5173	0.1889	0.2663	0.4539	-0.1452	-0.791	0.0707	-0.6478	0.6005	-0.0458	-0.0754	0.0689	-0.3416	0.1689	-0.1196	0.3056	0.4525	0.1312	0.0626	0.6138	0.4688	-0.078	0.3938	0.0518	0.2107	-0.3041	0.5521
113462	-0.2029	0.0723	-0.6593	0.0701	0.2196	0.7034	-0.0024	1.0388	0.5466	1.1073	-0.1739	0.0446	0.1673	-0.1766	0.26	-0.3282	-0.0211	0.7553	0.587	0.2415	-0.0646	-0.3051	-0.2252	-0.3074	0.1759	0.2454	-0.4633	0.3631	-0.5564	-0.8083	0.4516	-0.3799	0.0073	-0.3145	0.1247	-0.6488	0.4415	0.2765	0.6443	-0.1817	-0.3249	0.6124	0.2845	0.3429	-0.2406	0.0335	-0.2844	0.0506	-0.5357
113467	0.5416	1.2668	0.6661	-0.3083	-0.1162	-0.9391	-0.013	0.6551	0.3013	-0.0381	-0.0919	0.3347	-0.3495	-0.7127	-0.3328	0.4594	0.4437	0.6395	0.4453	-0.5667	-0.1254	0.0076	-0.3978	-0.2622	-0.6263	-2.1203	-0.1485	-0.2816	0.2927	-0.6328	-1.2795	-0.617	-0.2468	-0.358	0.4426	0.1663	0.4551	-0.9331	0.5023	-0.7472	0.985	-0.5205	-0.884	0.2849	0.3961	-1.1754	-0.7175	0.6601	-0.6612
113484	0.1272	0.1365	-0.4345	-0.2104	-0.1968	0.2793	-0.3761	-0.5378	0.3635	0.0105	-0.752	-0.045	-0.6365	0.0203	-0.1688	0.0656	-0.0157	-0.611	-0.6123	0.1608	-0.4115	-0.2396	-0.2061	0.2696	0.0406	0.275	-0.3062	0.1427	0.1922	-0.2383	0.7172	-0.0628	0.6422	-0.1707	-0.2227	0.5995	-0.2811	0.3265	0.1959	-0.1819	-0.0984	0.3967	-0.2517	-0.3952	0.0667	0.193	0.0868	-0.418	0.3336
113507	-0.2875	0.0625	-0.2243	0.2392	0.0124	0.3576	0.2287	0.1225	-0.1398	-0.0249	0.5341	0.3675	-0.2773	0.0986	0.1065	-0.0368	-0.1369	0.277	0.335	-0.0733	-0.1331	0.3229	-0.5787	-0.2583	0.1118	0.3014	0.1563	0.3119	0.1915	0.0359	-0.1136	-0.0941	0.2026	0.0759	0.3102	0.1178	-0.0337	0.5345	0.5527	0.0689	-0.4733	0.5813	0.0347	0.4015	-0.0542	0.4996	0.2717	-0.0745	0.4405
113536	0.3037	-0.4777	-0.3667	-0.2389	0.5403	0.0806	-0.0174	-0.0943	-0.1439	-0.3267	-0.2076	-0.4103	0.1811	0.1133	-0.2501	0.0256	-0.0945	0.215	-0.317	0.0399	0.304	0.0853	0.12	0.6078	0.5661	0.5096	-0.0445	-0.3594	0.3293	0.2146	0.7627	-0.0581	-0.0872	-0.2667	-0.2577	-0.1966	-0.3074	0.1285	-0.5159	-0.1225	-0.3485	-0.1479	-0.2543	0.2128	0.2352	0.1199	0.2734	-0.4756	0.0691
113563	-0.053	-0.0228	0.4332	-0.2362	-0.2359	0.148	-0.3643	-0.2962	0.0644	-0.2416	0.2562	-0.0206	0.1156	0.0257	-0.2956	-0.1566	0.2954	-0.3852	-0.0881	-0.1016	-0.0883	0.1774	0.1011	0.1698	-0.0934	-0.0836	0.0469	0.2803	0.6057	0.5494	0.2546	0.1663	-0.0749	0.0704	-0.1472	0.5709	-0.6659	0.4084	-0.3675	0.0896	0.0671	-0.0353	-0.1135	0.1296	0.1754	-0.3593	-0.217	0.1122	0.4461
113567	0.2082	-0.2337	0.2417	-0.0158	-0.1199	-0.0665	0.4443	-0.51	-0.3608	-0.4166	-0.1086	-0.1894	-0.1882	0.0747	0.1278	-0.0446	-0.2527	0.0613	-0.2709	-0.2506	0.0205	0.0857	0.0219	0.1088	0.1859	-0.2187	0.1106	-0.1658	0.1866	0.1245	0.1297	0.3486	-0.3412	0.0865	-0.1284	0.2175	-0.6576	-0.1473	-0.79	0.3039	0.0479	-0.514	0.1342	0.0847	0.2273	-0.0843	-0.3151	-0.4179	0.4794
113570	0.092	-0.0288	-0.4921	0.2825	0.0576	0.1247	0.2475	0.6025	0.2902	0.6329	-0.3735	-0.0061	0.0777	-0.1681	0.3105	-0.1354	0.0785	-0.3567	0.243	0.5984	-0.339	-0.345	-0.0505	-0.3242	-0.2049	0.172	-0.1294	-0.0131	-0.4057	-0.5934	0.0394	0.0357	-0.21	0.1044	-0.0947	0.142	0.0655	0.4819	0.7546	-0.0898	-0.0401	0.8646	0.211	-0.1213	-0.406	0.3675	0.2404	0.0855	0.5797
113574	-0.2148	0.387	0.7478	0.2312	0.3268	-0.4668	-0.4424	-0.4248	0.0021	-1.1211	0.3576	-0.219	0.4933	0.0916	-0.1613	-0.1233	0.2487	0.4924	-0.2083	-0.2503	0.2501	0.2965	-0.1694	-0.1953	0.1901	-0.8527	-0.0436	-0.2859	-0.7756	0.8726	0.0883	0.3327	-0.1449	0.3483	0.4243	0.2809	0.097	-0.6578	-0.6257	0.3278	0.3113	-0.9322	-0.1822	-0.5071	0.3463	-0.2809	0.0978	0.147	-0.5407
113600	-0.0617	0.1082	-0.6184	-0.2075	-0.1763	0.2306	0.0839	0.2082	0.1256	0.7661	-0.2714	0.0556	-0.3719	-0.1878	-0.0509	0.0946	0.128	0.0396	0.2925	-0.0542	-0.1898	-0.2651	-0.1116	-0.1335	-0.0362	0.4327	-0.1819	0.4125	0.2597	-0.2603	-0.0361	-0.2043	0.0952	-0.3324	-0.3807	0.1163	0.3204	0.281	0.4621	-0.2628	-0.111	0.3152	-0.2554	-0.2826	-0.4188	0.2104	-0.3307	-0.2707	0.5927
113623	-0.1476	0.5667	0.6236	0.1004	-0.0305	-0.3148	-0.3008	-0.2904	-0.033	-0.2745	-0.1477	0.2181	0.1671	-0.1791	-0.3233	0.1337	0.2417	-0.1638	-0.3994	-0.0579	-0.0346	0.0288	-0.2887	-0.2461	-0.4483	-0.5825	-0.0521	-0.1151	0.3525	0.315	0.1013	-0.0896	-0.2767	0.1261	0.2048	0.5526	0.1111	-0.3163	-0.3982	-0.0442	0.1004	-0.5814	0.0028	-0.3253	-0.2001	-0.6243	-0.2857	0.1173	-0.322
[truncated: 10,142 more rows]
[truncated: 81 more columns]
